# Supplementary material for: Exploring the Role of a Cytokinin-Activating Enzyme LONELY GUY in Unicellular Microalga Chlorella variabilis
Source: Front Plant Sci. 2021 Jan 29;11:611871. doi: 10.3389/fpls.2020.611871 (PMC7891180; doi:10.3389/fpls.2020.611871)
Supplement: Supplementary Table 2 — List of differentially expressed genes in LOG OX1 versus wild type by RNA-Seq, 1.5-fold change, adjusted p-value (q-values) ≤ 0.05. [file Table_2.XLSX]

## Sheet: Upregulated genes in LOG OX1
Table S2-List of genes upregulated in LOG OX1 versus WT (1.5-fold change, adjusted p-value (q-values) ≤0.05)
Gene_ID	Gene_ID	Name	CC Expression	CT Expression	FoldChange	log2FoldChange	P Value	Adjusted P Value	Regulation	Protein_name (Uniprot database algae reviewed)	Gene_Symbol	Organism_name	Pathway	Gene_Ontology	Gene_Ontology_IDs	GO_MF	GO_BP	GO_CC
gene4545	17355079	CHLNCDRAFT_35424	518.007	933.476	1.80205	0.84964	0.00177453	0.0140806	UP	Sulfate_permease_2, chloroplastic	SULP2_CHLREDRAFT_116547	Chlamydomonas_reinhardtii (Chlamydomonas_smithii)	ABC_transporters [02010]; Sulfur_metabolism [00920]; Transporters [02000]	chloroplast_membrane [GO:0031969]; integral_component_of_membrane [GO:0016021]; plasma_membrane [GO:0005886]; ATPase-coupled_sulfate_transmembrane_transporter_activity [GO:0015419]	GO:0005886; GO:0015419; GO:0016021; GO:0031969	GO:0015419~sulfate_transmembrane-transporting_ATPase_activity	NA	GO:0005886~plasma_membrane;GO:0016021~integral_component_of_membrane;GO:0031969~chloroplast_membrane
gene8312	17351237	CHLNCDRAFT_37143	3657.42	6980.53	1.90859	0.932508	0.00666268	0.0409243	UP	Glutamate-1-semialdehyde_1,2-aminomutase	hemL	Lepidodinium_chlorophorum (Dinoflagellate) (Gymnodinium_chlorophorum)	Amino_acid_related_enzymes [01007]; Porphyrin_and_chlorophyll_metabolism [00860]	glutamate-1-semialdehyde_2,1-aminomutase_activity [GO:0042286]; pyridoxal_phosphate_binding [GO:0030170]; transaminase_activity [GO:0008483]; tetrapyrrole_biosynthetic_process [GO:0033014]	GO:0008483; GO:0030170; GO:0033014; GO:0042286	GO:0008483~transaminase_activity;GO:0030170~pyridoxal_phosphate_binding;GO:0042286~glutamate-1-semialdehyde_2,1-aminomutase_activity	GO:0033014~tetrapyrrole_biosynthetic_process	NA
gene9329	17350301	CHLNCDRAFT_37654	1006.56	1740.18	1.72884	0.789804	0.00607603	0.0381025	UP	Glucose-1-phosphate_adenylyltransferase (EC_2.7.7.27)	DIS18_05260	Algibacter_sp. ZY111	Amino_sugar_and_nucleotide_sugar_metabolism [00520]; Starch_and_sucrose_metabolism [00500]	ATP_binding [GO:0005524]; glucose-1-phosphate_adenylyltransferase_activity [GO:0008878]; glycogen_biosynthetic_process [GO:0005978]	GO:0005524; GO:0005978; GO:0008878	GO:0005524~ATP_binding;GO:0008878~glucose-1-phosphate_adenylyltransferase_activity	GO:0005978~glycogen_biosynthetic_process	NA
gene2857	17356743	CHLNCDRAFT_143431	1440.07	3097.42	2.15089	1.10493	0.000388987	0.00398298	UP	Glutamine_synthetase (EC_6.3.1.2)	Esi_0188_0004	Ectocarpus_siliculosus (Brown_alga) (Conferva_siliculosa)	Arginine_biosynthesis [00220]; Glyoxylate_and_dicarboxylate_metabolism [00630]; Alanine, aspartate_and_glutamate_metabolism [00250]; Exosome [04147]; Nitrogen_metabolism [00910]	ATP_binding [GO:0005524]; glutamate-ammonia_ligase_activity [GO:0004356]; glutamine_biosynthetic_process [GO:0006542]	GO:0004356; GO:0005524; GO:0006542	GO:0004356~glutamate-ammonia_ligase_activity;GO:0005524~ATP_binding	GO:0006542~glutamine_biosynthetic_process	NA
gene7242	17352470	CHLNCDRAFT_59751	751.876	2202.26	2.92901	1.55042	1.39062e-07	3.55977e-06	UP	Proliferating_cell_nuclear_antigen	Esi_0003_0098	Ectocarpus_siliculosus (Brown_alga) (Conferva_siliculosa)	Base_excision_repair [03410]; Nucleotide_excision_repair [03420]; DNA_replication_proteins [03032]; Mismatch_repair [03430]; DNA_replication [03030]; DNA_repair_and_recombination_proteins [03400]	nucleus [GO:0005634]; DNA_binding [GO:0003677]; DNA_polymerase_processivity_factor_activity [GO:0030337]; DNA_replication [GO:0006260]; regulation_of_DNA_replication [GO:0006275]	GO:0003677; GO:0005634; GO:0006260; GO:0006275; GO:0030337	GO:0003677~DNA_binding;GO:0030337~DNA_polymerase_processivity_factor_activity	GO:0006260~DNA_replication;GO:0006275~regulation_of_DNA_replication	GO:0005634~nucleus
gene6798	17352709	CHLNCDRAFT_26108	616.539	1021.73	1.65721	0.728754	0.00734003	0.0442655	UP	Spermidine/spermine_synthase	Esi_0149_0059	Ectocarpus_siliculosus (Brown_alga) (Conferva_siliculosa)	beta-Alanine_metabolism [00410]; Arginine_and_proline_metabolism [00330]; Cysteine_and_methionine_metabolism [00270]; Glutathione_metabolism [00480]	transferase_activity [GO:0016740]; polyamine_biosynthetic_process [GO:0006596]	GO:0006596; GO:0016740	GO:0016740~transferase_activity	GO:0006596~polyamine_biosynthetic_process	NA
gene4885	17354734	CHLNCDRAFT_35597	462.145	1303.1	2.81968	1.49553	6.54962e-08	1.80631e-06	UP	3-ketoacyl-(Acyl-carrier-protein) reductase, 3-oxoacyl-[acyl-carrier-protein] reductase (EC_1.1.1.100)	Esi_0002_0211	Ectocarpus_siliculosus (Brown_alga) (Conferva_siliculosa)	Biotin_metabolism [00780]; Lipid_biosynthesis_proteins [01004]; Fatty_acid_biosynthesis [00061]; Prodigiosin_biosynthesis[00333]	3-oxo-glutaryl-[acp] methyl_ester_reductase_activity [GO:0102131]; 3-oxo-pimeloyl-[acp] methyl_ester_reductase_activity [GO:0102132]; 3-oxoacyl-[acyl-carrier-protein] reductase (NADPH) activity [GO:0004316]; NAD_binding [GO:0051287]; fatty_acid_biosynthetic_process [GO:0006633]	GO:0004316; GO:0006633; GO:0051287; GO:0102131; GO:0102132	GO:0004316~3-oxoacyl-[acyl-carrier-protein] reductase (NADPH) activity;GO:0051287~NAD_binding	GO:0006633~fatty_acid_biosynthetic_process	NA
gene1826	17357547	CHLNCDRAFT_56997	118.974	1086.85	9.13519	3.19144	1.36487e-27	4.10528e-25	UP	Acetolactate_synthase_large_subunit (EC_2.2.1.6)	BN1012_Phect2295	Candidatus_Phaeomarinobacter_ectocarpi	C5-Branched_dibasic_acid_metabolism [00660]; Valine, leucine_and_isoleucine_biosynthesis [00290]; Butanoate_metabolism [00650]; Pantothenate_and_CoA_biosynthesis [00770]	acetolactate_synthase_activity [GO:0003984]; thiamine_pyrophosphate_binding [GO:0030976]	GO:0003984; GO:0030976	GO:0003984~acetolactate_synthase_activity;GO:0030976~thiamine_pyrophosphate_binding	NA	NA
gene1808	17358038	CHLNCDRAFT_19601	1546.63	2783.91	1.79999	0.847988	0.00582847	0.0369559	UP	Chloroplast_sedoheptulose-1,7-bisphosphatase (EC_3.1.3.37)	SBP	Euglena_gracilis	Carbon_fixation_in_photosynthetic_organisms [00710]	integral_component_of_membrane [GO:0016021]; sedoheptulose-bisphosphatase_activity [GO:0050278]; carbohydrate_metabolic_process [GO:0005975]	GO:0005975; GO:0016021; GO:0050278	GO:0050278~sedoheptulose-bisphosphatase_activity	GO:0005975~carbohydrate_metabolic_process	GO:0016021~integral_component_of_membrane
gene4757	17355085	CHLNCDRAFT_31168	3357.08	6278.51	1.87023	0.903214	0.00788823	0.0467657	UP	Phosphoribulokinase (EC_2.7.1.19)	PRK_Esi_0000_0466	Ectocarpus_siliculosus (Brown_alga) (Conferva_siliculosa)	Carbon_fixation_in_photosynthetic_organisms [00710]	ATP_binding [GO:0005524]; phosphoribulokinase_activity [GO:0008974]; carbohydrate_metabolic_process [GO:0005975]	GO:0005524; GO:0005975; GO:0008974	GO:0005524~ATP_binding;GO:0008974~phosphoribulokinase_activity	GO:0005975~carbohydrate_metabolic_process	NA
gene1864	17357562	CHLNCDRAFT_34303	438.126	1077.45	2.45923	1.29821	2.18714e-06	4.23566e-05	UP	Ribose-5-phosphate_isomerase (EC_5.3.1.6)	RPI_Esi_0126_0081	Ectocarpus_siliculosus (Brown_alga) (Conferva_siliculosa)	Carbon_fixation_in_photosynthetic_organisms [00710]; Pentose_phosphate_pathway [00030]	ribose-5-phosphate_isomerase_activity [GO:0004751]; pentose-phosphate_shunt, non-oxidative_branch [GO:0009052]	GO:0004751; GO:0009052	GO:0004751~ribose-5-phosphate_isomerase_activity	GO:0009052~pentose-phosphate_shunt, non-oxidative_branch	NA
gene5153	17354397	CHLNCDRAFT_35742	254.959	682.258	2.67596	1.42005	2.04132e-07	5.01218e-06	UP	Peptidyl-prolyl_cis-trans_isomerase (PPIase) (EC_5.2.1.8)	Esi_0014_0052	Ectocarpus_siliculosus (Brown_alga) (Conferva_siliculosa)	Chaperones_and_folding_catalysts [03110]	peptidyl-prolyl_cis-trans_isomerase_activity [GO:0003755]; protein_folding [GO:0006457]	GO:0003755; GO:0006457	GO:0003755~peptidyl-prolyl_cis-trans_isomerase_activity	GO:0006457~protein_folding	NA
gene8637	17350987	CHLNCDRAFT_140078	781.485	1493.96	1.91169	0.934849	0.000859216	0.00784187	UP	Caltractin (Centrin) (Fragment)	NA	Tetraselmis_striata (Green_microalga)	Chromosome_and_associated_proteins [03036]	calcium_ion_binding [GO:0005509]; cell_cycle [GO:0007049]; cell_division [GO:0051301]	GO:0005509; GO:0007049; GO:0051301	GO:0005509~calcium_ion_binding	GO:0007049~cell_cycle;GO:0051301~cell_division	NA
gene4991	17354762	CHLNCDRAFT_56178	1117.75	2434.49	2.17803	1.12302	0.000191322	0.00216135	UP	Obg-like_ATPase_1	OLA1_Esi_0072_0060	Ectocarpus_siliculosus (Brown_alga) (Conferva_siliculosa)	Chromosome_and_associated_proteins [03036]	cytoplasm [GO:0005737]; ATP_binding [GO:0005524]; ATPase_activity [GO:0016887]; GTP_binding [GO:0005525]; ribosomal_large_subunit_binding [GO:0043023]; ribosome_binding [GO:0043022]	GO:0005524; GO:0005525; GO:0005737; GO:0016887; GO:0043022; GO:0043023	GO:0005524~ATP_binding;GO:0005525~GTP_binding;GO:0016887~ATPase_activity;GO:0043022~ribosome_binding;GO:0043023~ribosomal_large_subunit_binding	NA	GO:0005737~cytoplasm
gene8743	17350924	CHLNCDRAFT_59234	764.043	1606.67	2.10286	1.07235	0.000141092	0.00165409	UP	SMC2 (STRUCTURAL_MAINTENANCE_OF_CHROMOSOMES_2)	Esi_0101_0095	Ectocarpus_siliculosus (Brown_alga) (Conferva_siliculosa)	Chromosome_and_associated_proteins [03036]	chromosome [GO:0005694]; integral_component_of_membrane [GO:0016021]; ATP_binding [GO:0005524]; chromosome_organization [GO:0051276]	GO:0005524; GO:0005694; GO:0016021; GO:0051276	GO:0005524~ATP_binding	GO:0051276~chromosome_organization	GO:0005694~chromosome;GO:0016021~integral_component_of_membrane
gene5089	17354550	CHLNCDRAFT_134635	235.82	879.487	3.72948	1.89897	4.57895e-12	2.65497e-10	UP	Structural_maintenance_of_chromosomes_protein	Esi_0056_0090	Ectocarpus_siliculosus (Brown_alga) (Conferva_siliculosa)	Chromosome_and_associated_proteins [03036]	chromosome [GO:0005694]; nucleus [GO:0005634]; ATP_binding [GO:0005524]; chromosome_organization [GO:0051276]	GO:0005524; GO:0005634; GO:0005694; GO:0051276	GO:0005524~ATP_binding	GO:0051276~chromosome_organization	GO:0005634~nucleus;GO:0005694~chromosome
gene2270	17357361	CHLNCDRAFT_142415	261.533	643.595	2.46085	1.29916	1.95522e-06	3.84847e-05	UP	Uncharacterized_protein	Esi_0153_0004	Ectocarpus_siliculosus (Brown_alga) (Conferva_siliculosa)	Chromosome_and_associated_proteins [03036]	methyltransferase_activity [GO:0008168]; protein_methylation [GO:0006479]	GO:0006479; GO:0008168	GO:0008168~methyltransferase_activity	GO:0006479~protein_methylation	NA
gene5492	17353996	CHLNCDRAFT_135132	140.437	370.86	2.64075	1.40095	3.28296e-06	6.08834e-05	UP	Uncharacterized_protein	Esi_0114_0045	Ectocarpus_siliculosus (Brown_alga) (Conferva_siliculosa)	Chromosome_and_associated_proteins [03036]	condensin_complex [GO:0000796]; mitotic_chromosome_condensation [GO:0007076]	GO:0000796; GO:0007076	NA	GO:0007076~mitotic_chromosome_condensation	GO:0000796~condensin_complex
gene4225	17355330	CHLNCDRAFT_145362	183.401	488.512	2.66362	1.41339	6.10072e-07	1.36875e-05	UP	Putative_microtubule-associated_protein_EB1	Esi_0107_0056	Ectocarpus_siliculosus (Brown_alga) (Conferva_siliculosa)	Chromosome_and_associated_proteins [03036]; Cytoskeleton_proteins [04812]	microtubule [GO:0005874]; microtubule_binding [GO:0008017]	GO:0005874; GO:0008017	GO:0008017~microtubule_binding	NA	GO:0005874~microtubule
gene1640	17358343	CHLNCDRAFT_34202	244.411	684.782	2.80177	1.48634	5.5686e-08	1.56262e-06	UP	DNA_helicase (EC_3.6.4.12)	Esi_0063_0095	Ectocarpus_siliculosus (Brown_alga) (Conferva_siliculosa)	Chromosome_and_associated_proteins [03036]; DNA_replication [03030]; DNA_replication_proteins [03032]	MCM_complex [GO:0042555]; nucleus [GO:0005634]; ATP_binding [GO:0005524]; DNA_replication_origin_binding [GO:0003688]; helicase_activity [GO:0004386]; DNA_replication_initiation [GO:0006270]	GO:0003688; GO:0004386; GO:0005524; GO:0005634; GO:0006270; GO:0042555	GO:0003688~DNA_replication_origin_binding;GO:0004386~helicase_activity;GO:0005524~ATP_binding	GO:0006270~DNA_replication_initiation	GO:0005634~nucleus;GO:0042555~MCM_complex
gene6636	17352872	CHLNCDRAFT_25737	131	619.117	4.72609	2.24065	5.71383e-15	5.04547e-13	UP	DNA_helicase (EC_3.6.4.12)	Esi_0029_0091	Ectocarpus_siliculosus (Brown_alga) (Conferva_siliculosa)	Chromosome_and_associated_proteins [03036]; DNA_replication [03030]; DNA_replication_proteins [03032]	MCM_complex [GO:0042555]; nucleus [GO:0005634]; ATP_binding [GO:0005524]; DNA_binding [GO:0003677]; helicase_activity [GO:0004386]; DNA_replication_initiation [GO:0006270]	GO:0003677; GO:0004386; GO:0005524; GO:0005634; GO:0006270; GO:0042555	GO:0003677~DNA_binding;GO:0004386~helicase_activity;GO:0005524~ATP_binding	GO:0006270~DNA_replication_initiation	GO:0005634~nucleus;GO:0042555~MCM_complex
gene1966	17357738	CHLNCDRAFT_10568	184.203	418.238	2.27053	1.18303	3.89316e-05	0.000547832	UP	Cyclin_B2	cycB2_Esi_0295_0026	Ectocarpus_siliculosus (Brown_alga) (Conferva_siliculosa)	Chromosome_and_associated_proteins [03036]; DNA_replication_proteins [03032]	nucleus [GO:0005634]	GO:0005634	NA	NA	GO:0005634~nucleus
gene835	17358677	CHLNCDRAFT_137783	264.582	954.848	3.60889	1.85156	1.74865e-11	9.19714e-10	UP	DNA_topoisomerase_II (EC_5.99.1.3)	TOP2_Esi_0042_0095	Ectocarpus_siliculosus (Brown_alga) (Conferva_siliculosa)	Chromosome_and_associated_proteins [03036]; DNA_replication_proteins [03032]	ATP_binding [GO:0005524]; DNA_binding [GO:0003677]; DNA_topoisomerase_type_II (ATP-hydrolyzing) activity [GO:0003918]; DNA_topological_change [GO:0006265]	GO:0003677; GO:0003918; GO:0005524; GO:0006265	GO:0003677~DNA_binding;GO:0003918~DNA_topoisomerase_type_II (ATP-hydrolyzing) activity;GO:0005524~ATP_binding	GO:0006265~DNA_topological_change	NA
gene7937	17351701	CHLNCDRAFT_139139	347.515	648.073	1.86488	0.89908	0.000718787	0.00672335	UP	Origin_recognition_complex_subunit_1	Esi_0035_0148	Ectocarpus_siliculosus (Brown_alga) (Conferva_siliculosa)	Chromosome_and_associated_proteins [03036]; DNA_replication_proteins [03032]	nucleus [GO:0005634]; ATP_binding [GO:0005524]; chromatin_binding [GO:0003682]; DNA_binding [GO:0003677]; DNA_replication [GO:0006260]	GO:0003677; GO:0003682; GO:0005524; GO:0005634; GO:0006260	GO:0003677~DNA_binding;GO:0003682~chromatin_binding;GO:0005524~ATP_binding	GO:0006260~DNA_replication	GO:0005634~nucleus
gene7208	17352435	CHLNCDRAFT_10750	40.8813	133.578	3.26747	1.70817	8.21313e-05	0.00104771	UP	Possibly_a_dual-specificity_PK	PK_Esi_0045_0049	Ectocarpus_siliculosus (Brown_alga) (Conferva_siliculosa)	Chromosome_and_associated_proteins [03036]; Protein_kinases [01001]	ATP_binding [GO:0005524]; protein_serine/threonine/tyrosine_kinase_activity [GO:0004712]; chromosome_separation [GO:0051304]; mitotic_cell_cycle_checkpoint [GO:0007093]	GO:0004712; GO:0005524; GO:0007093; GO:0051304	GO:0004712~protein_serine/threonine/tyrosine_kinase_activity;GO:0005524~ATP_binding	GO:0007093~mitotic_cell_cycle_checkpoint;GO:0051304~chromosome_separation	NA
gene1993	17357645	CHLNCDRAFT_57054	782.233	1741.5	2.22632	1.15466	5.60713e-05	0.000752201	UP	Cysteine_synthase (EC_2.5.1.47)	CYS_Esi_0646_0004	Ectocarpus_siliculosus (Brown_alga) (Conferva_siliculosa)	Cysteine_and_methionine_metabolism [00270]; Sulfur_metabolism [00920]	cysteine_synthase_activity [GO:0004124]; cysteine_biosynthetic_process_from_serine [GO:0006535]	GO:0004124; GO:0006535	GO:0004124~cysteine_synthase_activity	GO:0006535~cysteine_biosynthetic_process_from_serine	NA
gene7201	17352429	CHLNCDRAFT_26240	11.7358	43.3991	3.698	1.88675	0.00253869	0.0191496	UP	Kinesin (Subfamily)	Esi_0027_0071	Ectocarpus_siliculosus (Brown_alga) (Conferva_siliculosa)	Cytoskeleton_proteins [04812]	ATP_binding [GO:0005524]; microtubule_binding [GO:0008017]; microtubule_motor_activity [GO:0003777]; microtubule-based_movement [GO:0007018]	GO:0003777; GO:0005524; GO:0007018; GO:0008017	GO:0003777~microtubule_motor_activity;GO:0005524~ATP_binding;GO:0008017~microtubule_binding	GO:0007018~microtubule-based_movement	NA
gene3542	17356050	CHLNCDRAFT_8821	44.4828	156.92	3.52765	1.81871	1.07695e-05	0.000177799	UP	Kinesin-like_protein	Esi_0016_0165	Ectocarpus_siliculosus (Brown_alga) (Conferva_siliculosa)	Cytoskeleton_proteins [04812]	microtubule [GO:0005874]; ATP_binding [GO:0005524]; ATP-dependent_microtubule_motor_activity, minus-end-directed [GO:0008569]; microtubule_binding [GO:0008017]; microtubule-based_movement [GO:0007018]	GO:0005524; GO:0005874; GO:0007018; GO:0008017; GO:0008569	GO:0005524~ATP_binding;GO:0008017~microtubule_binding;GO:0008569~ATP-dependent_microtubule_motor_activity, minus-end-directed	GO:0007018~microtubule-based_movement	GO:0005874~microtubule
gene3012	17356658	CHLNCDRAFT_10198	20.8302	89.5532	4.2992	2.10407	3.40342e-05	0.000487468	UP	Uncharacterized_protein	Esi_0023_0170	Ectocarpus_siliculosus (Brown_alga) (Conferva_siliculosa)	Cytoskeleton_proteins [04812]	ATP_binding [GO:0005524]; microtubule_binding [GO:0008017]; microtubule_motor_activity [GO:0003777]; microtubule-based_movement [GO:0007018]	GO:0003777; GO:0005524; GO:0007018; GO:0008017	GO:0003777~microtubule_motor_activity;GO:0005524~ATP_binding;GO:0008017~microtubule_binding	GO:0007018~microtubule-based_movement	NA
gene9337	17350283	CHLNCDRAFT_59403	268.363	479.082	1.7852	0.836085	0.00226545	0.0173745	UP	Uncharacterized_protein (Fragment)	Esi_0128_0037	Ectocarpus_siliculosus (Brown_alga) (Conferva_siliculosa)	Cytoskeleton_proteins [04812]	ATP_binding [GO:0005524]; microtubule_binding [GO:0008017]; microtubule_motor_activity [GO:0003777]; microtubule-based_movement [GO:0007018]	GO:0003777; GO:0005524; GO:0007018; GO:0008017	GO:0003777~microtubule_motor_activity;GO:0005524~ATP_binding;GO:0008017~microtubule_binding	GO:0007018~microtubule-based_movement	NA
gene7289	17352162	CHLNCDRAFT_9136	33.6778	140.468	4.17093	2.06037	2.68152e-06	5.09065e-05	UP	Kinesin-like_protein	Esi_0037_0124	Ectocarpus_siliculosus (Brown_alga) (Conferva_siliculosa)	Cytoskeleton_proteins [04812]; Chromosome_and_associated_proteins [03036]	microtubule [GO:0005874]; ATP_binding [GO:0005524]; ATP-dependent_microtubule_motor_activity, minus-end-directed [GO:0008569]; microtubule_binding [GO:0008017]; microtubule-based_movement [GO:0007018]	GO:0005524; GO:0005874; GO:0007018; GO:0008017; GO:0008569	GO:0005524~ATP_binding;GO:0008017~microtubule_binding;GO:0008569~ATP-dependent_microtubule_motor_activity, minus-end-directed	GO:0007018~microtubule-based_movement	GO:0005874~microtubule
gene5844	17353635	CHLNCDRAFT_36044	113.534	217.755	1.91798	0.939587	0.00540759	0.0348381	UP	Uncharacterized_protein (Fragment)	Esi_0128_0037	Ectocarpus_siliculosus (Brown_alga) (Conferva_siliculosa)	Cytoskeleton_proteins [04812]; Chromosome_and_associated_proteins [03036]	ATP_binding [GO:0005524]; microtubule_binding [GO:0008017]; microtubule_motor_activity [GO:0003777]; microtubule-based_movement [GO:0007018]	GO:0003777; GO:0005524; GO:0007018; GO:0008017	GO:0003777~microtubule_motor_activity;GO:0005524~ATP_binding;GO:0008017~microtubule_binding	GO:0007018~microtubule-based_movement	NA
gene4918	17354768	CHLNCDRAFT_134358	74.1822	190.178	2.56366	1.3582	0.000232876	0.00256163	UP	DEAD_box_helicase	Esi_0163_0012	Ectocarpus_siliculosus (Brown_alga) (Conferva_siliculosa)	DNA_repair_and_recombination_proteins [03400]	ATP_binding [GO:0005524]; DNA-directed_DNA_polymerase_activity [GO:0003887]; helicase_activity [GO:0004386]; nucleic_acid_binding [GO:0003676]; DNA-dependent_DNA_replication [GO:0006261]	GO:0003676; GO:0003887; GO:0004386; GO:0005524; GO:0006261	GO:0003676~nucleic_acid_binding;GO:0003887~DNA-directed_DNA_polymerase_activity;GO:0004386~helicase_activity;GO:0005524~ATP_binding	GO:0006261~DNA-dependent_DNA_replication	NA
gene701	17358820	CHLNCDRAFT_48454	882.579	1595.08	1.80729	0.853832	0.0026758	0.0200425	UP	Uncharacterized_protein	Esi_0006_0151	Ectocarpus_siliculosus (Brown_alga) (Conferva_siliculosa)	DNA_repair_and_recombination_proteins [03400]	deoxyribodipyrimidine_photo-lyase_activity [GO:0003904]; DNA_repair [GO:0006281]	GO:0003904; GO:0006281	GO:0003904~deoxyribodipyrimidine_photo-lyase_activity	GO:0006281~DNA_repair	NA
gene7819	17351808	CHLNCDRAFT_26745	574.369	1047.44	1.82364	0.866823	0.00137985	0.0113736	UP	DNA_polymerase_epsilon_catalytic_subunit (EC_2.7.7.7)	Esi_0006_0016	Ectocarpus_siliculosus (Brown_alga) (Conferva_siliculosa)	DNA_replication [03030]; Base_excision_repair [03410]; DNA_replication_proteins [03032]; Nucleotide_excision_repair [03420]; DNA_repair_and_recombination_proteins [03400]	epsilon_DNA_polymerase_complex [GO:0008622]; 4_iron, 4_sulfur_cluster_binding [GO:0051539]; DNA_binding [GO:0003677]; DNA-directed_DNA_polymerase_activity [GO:0003887]; metal_ion_binding [GO:0046872]; nucleotide_binding [GO:0000166]; DNA_repair [GO:0006281]; DNA_replication [GO:0006260]	GO:0000166; GO:0003677; GO:0003887; GO:0006260; GO:0006281; GO:0008622; GO:0046872; GO:0051539	GO:0000166~nucleotide_binding;GO:0003677~DNA_binding;GO:0003887~DNA-directed_DNA_polymerase_activity;GO:0046872~metal_ion_binding;GO:0051539~4_iron, 4_sulfur_cluster_binding	GO:0006260~DNA_replication;GO:0006281~DNA_repair	GO:0008622~epsilon_DNA_polymerase_complex
gene8879	17350677	CHLNCDRAFT_28165	347.595	800.593	2.30323	1.20366	8.47022e-06	0.000142279	UP	DNA_helicase (EC_3.6.4.12)	Esi_0246_0019	Ectocarpus_siliculosus (Brown_alga) (Conferva_siliculosa)	DNA_replication [03030]; DNA_replication_proteins [03032]	MCM_complex [GO:0042555]; nucleus [GO:0005634]; ATP_binding [GO:0005524]; DNA_binding [GO:0003677]; DNA_helicase_activity [GO:0003678]; DNA_replication_initiation [GO:0006270]	GO:0003677; GO:0003678; GO:0005524; GO:0005634; GO:0006270; GO:0042555	GO:0003677~DNA_binding;GO:0003678~DNA_helicase_activity;GO:0005524~ATP_binding	GO:0006270~DNA_replication_initiation	GO:0005634~nucleus;GO:0042555~MCM_complex
gene7844	17351740	CHLNCDRAFT_139024	198.258	769.321	3.88041	1.95621	2.35053e-12	1.45652e-10	UP	DNA_polymerase (EC_2.7.7.7)	Esi_0115_0081	Ectocarpus_siliculosus (Brown_alga) (Conferva_siliculosa)	DNA_replication [03030]; DNA_replication_proteins [03032]	nucleus [GO:0005634]; 4_iron, 4_sulfur_cluster_binding [GO:0051539]; DNA_binding [GO:0003677]; DNA-directed_DNA_polymerase_activity [GO:0003887]; metal_ion_binding [GO:0046872]; nucleoside_binding [GO:0001882]; nucleotide_binding [GO:0000166]; DNA_replication [GO:0006260]	GO:0000166; GO:0001882; GO:0003677; GO:0003887; GO:0005634; GO:0006260; GO:0046872; GO:0051539	GO:0000166~nucleotide_binding;GO:0001882~nucleoside_binding;GO:0003677~DNA_binding;GO:0003887~DNA-directed_DNA_polymerase_activity;GO:0046872~metal_ion_binding;GO:0051539~4_iron, 4_sulfur_cluster_binding	GO:0006260~DNA_replication	GO:0005634~nucleus
gene1270	17357848	CHLNCDRAFT_10114	157.152	342.736	2.18092	1.12494	0.000183348	0.00208843	UP	DNA_polymerase_alpha_subunit_B	Esi_0090_0069	Ectocarpus_siliculosus (Brown_alga) (Conferva_siliculosa)	DNA_replication [03030]; DNA_replication_proteins [03032]	nucleus [GO:0005634]; DNA_binding [GO:0003677]; DNA-directed_DNA_polymerase_activity [GO:0003887]; DNA_replication [GO:0006260]	GO:0003677; GO:0003887; GO:0005634; GO:0006260	GO:0003677~DNA_binding;GO:0003887~DNA-directed_DNA_polymerase_activity	GO:0006260~DNA_replication	GO:0005634~nucleus
gene6712	17352930	CHLNCDRAFT_8099	216.455	430.937	1.99088	0.993407	0.000456978	0.00456266	UP	DNA_primase_large_subunit (EC_2.7.7.-)	Esi_0192_0018	Ectocarpus_siliculosus (Brown_alga) (Conferva_siliculosa)	DNA_replication [03030]; DNA_replication_proteins [03032]	4_iron, 4_sulfur_cluster_binding [GO:0051539]; DNA_binding [GO:0003677]; DNA_primase_activity [GO:0003896]; metal_ion_binding [GO:0046872]	GO:0003677; GO:0003896; GO:0046872; GO:0051539	GO:0003677~DNA_binding;GO:0003896~DNA_primase_activity;GO:0046872~metal_ion_binding;GO:0051539~4_iron, 4_sulfur_cluster_binding	NA	NA
gene5830	17353652	CHLNCDRAFT_17561	11.5989	55.38	4.77459	2.25538	0.000188459	0.00213955	UP	Uncharacterized_protein	Esi_0071_0051	Ectocarpus_siliculosus (Brown_alga) (Conferva_siliculosa)	DNA_replication_proteins [03032]	nucleus [GO:0005634]; DNA_replication [GO:0006260]	GO:0005634; GO:0006260	NA	GO:0006260~DNA_replication	GO:0005634~nucleus
gene2275	17357444	CHLNCDRAFT_142420	65.193	140.941	2.1619	1.1123	0.0048981	0.0321804	UP	DEAD_box_helicase	Esi_0088_0014	Ectocarpus_siliculosus (Brown_alga) (Conferva_siliculosa)	DNA_replication_proteins [03032]; DNA_repair_and_recombination_proteins [03400]	ATP_binding [GO:0005524]; ATP-dependent_helicase_activity [GO:0008026]; nucleic_acid_binding [GO:0003676]; zinc_ion_binding [GO:0008270]; DNA_recombination [GO:0006310]	GO:0003676; GO:0005524; GO:0006310; GO:0008026; GO:0008270	GO:0003676~nucleic_acid_binding;GO:0005524~ATP_binding;GO:0008026~ATP-dependent_helicase_activity;GO:0008270~zinc_ion_binding	GO:0006310~DNA_recombination	NA
gene8835	17350793	CHLNCDRAFT_28106	238.792	434.979	1.82158	0.865191	0.00186752	0.0146974	UP	Cytokinin_riboside_5'-monophosphate_phosphoribohydrolase (EC_3.2.2.n1)	BKP44_17915	Formosa_algae	Enzymes_with_EC_numbers[99980]	hydrolase_activity [GO:0016787]; cytokinin_biosynthetic_process [GO:0009691]	GO:0009691; GO:0016787	GO:0016787~hydrolase_activity	GO:0009691~cytokinin_biosynthetic_process	NA
gene7340	17352175	CHLNCDRAFT_26350	167.321	311.004	1.85873	0.894321	0.00308094	0.0223973	UP	D-lactate_dehydrognease_2, putative	Esi_0197_0042	Ectocarpus_siliculosus (Brown_alga) (Conferva_siliculosa)	Enzymes_with_EC_numbers[99980]	FAD_binding [GO:0071949]; oxidoreductase_activity [GO:0016491]	GO:0016491; GO:0071949	GO:0016491~oxidoreductase_activity;GO:0071949~FAD_binding	NA	NA
gene6329	17353357	CHLNCDRAFT_56246	736.009	1535.76	2.0866	1.06116	0.000161032	0.00185621	UP	Triosephosphate_isomerase/glyceraldehyde-3-phosphate_dehydrogenase (EC_5.3.1.1)	GAP_TPI_Esi_0187_0027	Ectocarpus_siliculosus (Brown_alga) (Conferva_siliculosa)	Exosome [04147]; Inositol_phosphate_metabolism [00562]; Fructose_and_mannose_metabolism [00051]; Glycolysis / Gluconeogenesis [00010]; Carbon_fixation_in_photosynthetic_organisms [00710]	NAD_binding [GO:0051287]; NADP_binding [GO:0050661]; oxidoreductase_activity, acting_on_the_aldehyde_or_oxo_group_of_donors, NAD_or_NADP_as_acceptor [GO:0016620]; triose-phosphate_isomerase_activity [GO:0004807]; glucose_metabolic_process [GO:0006006]; glycolytic_process [GO:0006096]	GO:0004807; GO:0006006; GO:0006096; GO:0016620; GO:0050661; GO:0051287	GO:0004807~triose-phosphate_isomerase_activity;GO:0016620~oxidoreductase_activity, acting_on_the_aldehyde_or_oxo_group_of_donors, NAD_or_NADP_as_acceptor;GO:0050661~NADP_binding;GO:0051287~NAD_binding	GO:0006006~glucose_metabolic_process;GO:0006096~glycolytic_process	NA
gene8349	17351226	CHLNCDRAFT_37179	17968.8	38602	2.14828	1.10319	0.00137298	0.011353	UP	Fructose-bisphosphate_aldolase, class_I	NA	Chlamydomonas_sp. (strain_W80)	Exosome [04147]; Pentose_phosphate_pathway [00030]; Glycolysis / Gluconeogenesis [00010]; Membrane_trafficking [04131]; Fructose_and_mannose_metabolism [00051]; Chromosome_and_associated_proteins [03036]; Carbon_fixation_in_photosynthetic_organisms [00710]	fructose-bisphosphate_aldolase_activity [GO:0004332]; glycolytic_process [GO:0006096]	GO:0004332; GO:0006096	GO:0004332~fructose-bisphosphate_aldolase_activity	GO:0006096~glycolytic_process	NA
gene3223	17356448	CHLNCDRAFT_143919	584.61	1083.52	1.8534	0.890173	0.00107108	0.00923737	UP	Molybdenum_cofactor_sulfurase (MCS) (MOS) (MoCo_sulfurase) (EC_2.8.1.9) (Molybdenum_cofactor_sulfurtransferase)	Esi_0553_0005	Ectocarpus_siliculosus (Brown_alga) (Conferva_siliculosa)	Folate_biosynthesis [00790]	lyase_activity [GO:0016829]; Mo-molybdopterin_cofactor_sulfurase_activity [GO:0008265]; molybdenum_cofactor_sulfurtransferase_activity [GO:0102867]; molybdenum_ion_binding [GO:0030151]; pyridoxal_phosphate_binding [GO:0030170]; Mo-molybdopterin_cofactor_biosynthetic_process [GO:0006777]	GO:0006777; GO:0008265; GO:0016829; GO:0030151; GO:0030170; GO:0102867	GO:0008265~Mo-molybdopterin_cofactor_sulfurase_activity;GO:0016829~lyase_activity;GO:0030151~molybdenum_ion_binding;GO:0030170~pyridoxal_phosphate_binding	GO:0006777~Mo-molybdopterin_cofactor_biosynthetic_process	NA
gene8333	17351191	CHLNCDRAFT_49159	748.963	1319.38	1.76161	0.816895	0.0032776	0.0234724	UP	N-acetylglucosaminephosphotransferase (EC_2.7.8.15)	DPAGT1_Esi_0111_0044	Ectocarpus_siliculosus (Brown_alga) (Conferva_siliculosa)	Glycosyltransferases [01003]; N-Glycan_biosynthesis [00510]	integral_component_of_membrane [GO:0016021]; phospho-N-acetylmuramoyl-pentapeptide-transferase_activity [GO:0008963]; UDP-N-acetylglucosamine-dolichyl-phosphate_N-acetylglucosaminephosphotransferase_activity [GO:0003975]; dolichol-linked_oligosaccharide_biosynthetic_process [GO:0006488]	GO:0003975; GO:0006488; GO:0008963; GO:0016021	GO:0003975~UDP-N-acetylglucosamine-dolichyl-phosphate_N-acetylglucosaminephosphotransferase_activity;GO:0008963~phospho-N-acetylmuramoyl-pentapeptide-transferase_activity	GO:0006488~dolichol-linked_oligosaccharide_biosynthetic_process	GO:0016021~integral_component_of_membrane
gene537	17359576	CHLNCDRAFT_59545	12978.3	31747.7	2.44622	1.29056	0.000238062	0.00261569	UP	Ribulose_bisphosphate_carboxylase_small_chain_1, chloroplastic (RuBisCO_small_subunit_1) (EC_4.1.1.39)	RBCS-1_CHLRE_02g120100v5_CHLREDRAFT_82986	Chlamydomonas_reinhardtii (Chlamydomonas_smithii)	Glyoxylate_and_dicarboxylate_metabolism [00630]; Carbon_fixation_in_photosynthetic_organisms [00710]	chloroplast [GO:0009507]; monooxygenase_activity [GO:0004497]; ribulose-bisphosphate_carboxylase_activity [GO:0016984]; carbon_fixation [GO:0015977]; photorespiration [GO:0009853]; photosynthesis [GO:0015979]	GO:0004497; GO:0009507; GO:0009853; GO:0015977; GO:0015979; GO:0016984	GO:0004497~monooxygenase_activity;GO:0016984~ribulose-bisphosphate_carboxylase_activity	GO:0009853~photorespiration;GO:0015977~carbon_fixation;GO:0015979~photosynthesis	GO:0009507~chloroplast
gene538	17359197	CHLNCDRAFT_29368	14163.2	40445.4	2.85567	1.51383	1.48681e-05	0.00023693	UP	Ribulose_bisphosphate_carboxylase_small_chain_1, chloroplastic (RuBisCO_small_subunit_1) (EC_4.1.1.39)	RBCS-1_CHLRE_02g120100v5_CHLREDRAFT_82986	Chlamydomonas_reinhardtii (Chlamydomonas_smithii)	Glyoxylate_and_dicarboxylate_metabolism [00630]; Carbon_fixation_in_photosynthetic_organisms [00710]	chloroplast [GO:0009507]; monooxygenase_activity [GO:0004497]; ribulose-bisphosphate_carboxylase_activity [GO:0016984]; carbon_fixation [GO:0015977]; photorespiration [GO:0009853]; photosynthesis [GO:0015979]	GO:0004497; GO:0009507; GO:0009853; GO:0015977; GO:0015979; GO:0016984	GO:0004497~monooxygenase_activity;GO:0016984~ribulose-bisphosphate_carboxylase_activity	GO:0009853~photorespiration;GO:0015977~carbon_fixation;GO:0015979~photosynthesis	GO:0009507~chloroplast
gene1378	17357972	CHLNCDRAFT_140434	446.551	1133.99	2.53944	1.34451	9.61223e-07	2.06513e-05	UP	Malonyl-CoA:ACP_transacylase	Esi_0043_0063	Ectocarpus_siliculosus (Brown_alga) (Conferva_siliculosa)	Lipid_biosynthesis_proteins [01004]; Prodigiosin_biosynthesis[00333]; Fatty_acid_biosynthesis [00061]	[acyl-carrier-protein] S-malonyltransferase_activity [GO:0004314]	GO:0004314	GO:0004314~[acyl-carrier-protein] S-malonyltransferase_activity	NA	NA
gene3546	17356051	CHLNCDRAFT_12548	88.423	183.559	2.07592	1.05375	0.00402456	0.0277216	UP	Lipoyltransferase	Esi_0071_0057	Ectocarpus_siliculosus (Brown_alga) (Conferva_siliculosa)	Lipoic_acid_metabolism [00785]	lipoyl(octanoyl) transferase_activity [GO:0033819]; protein_lipoylation [GO:0009249]	GO:0009249; GO:0033819	GO:0033819~lipoyl(octanoyl) transferase_activity	GO:0009249~protein_lipoylation	NA
gene6231	17353463	CHLNCDRAFT_25269	304.43	600.477	1.97246	0.979997	0.000293459	0.00312104	UP	Dihydrodipicolinate_reductase (EC_1.3.1.26)	DHDPR_Esi_0012_0041	Ectocarpus_siliculosus (Brown_alga) (Conferva_siliculosa)	Lysine_biosynthesis [00300]; Monobactam_biosynthesis [00261]	4-hydroxy-tetrahydrodipicolinate_reductase [GO:0008839]; NADPH_binding [GO:0070402]; lysine_biosynthetic_process_via_diaminopimelate [GO:0009089]	GO:0008839; GO:0009089; GO:0070402	GO:0008839~4-hydroxy-tetrahydrodipicolinate_reductase;GO:0070402~NADPH_binding	GO:0009089~lysine_biosynthetic_process_via_diaminopimelate	NA
gene2195	17357753	CHLNCDRAFT_57124	2002.64	3632.77	1.81399	0.859169	0.00733716	0.0442655	UP	Uncharacterized_protein	Esi_0333_0005	Ectocarpus_siliculosus (Brown_alga) (Conferva_siliculosa)	Membrane_trafficking [04131]	NA	NA	NA	NA	NA
gene3259	17356483	CHLNCDRAFT_51440	168.575	435.636	2.58422	1.36973	1.89958e-06	3.76203e-05	UP	DNA_helicase (EC_3.6.4.12)	phytr_660	Candidatus_Phycorickettsia_trachydisci	Mismatch_repair [03430]; Nucleotide_excision_repair [03420]; DNA_repair_and_recombination_proteins [03400]	ATP_binding [GO:0005524]; ATP-dependent_DNA_helicase_activity [GO:0004003]; DNA_binding [GO:0003677]	GO:0003677; GO:0004003; GO:0005524	GO:0003677~DNA_binding;GO:0004003~ATP-dependent_DNA_helicase_activity;GO:0005524~ATP_binding	NA	NA
gene7864	17351647	CHLNCDRAFT_26915	47.3942	181.735	3.83454	1.93905	8.18826e-07	1.77905e-05	UP	Unconventional_myosin_heavy_chain	ccm	Chara_corallina (Stonewort) (Green_alga)	Mitochondrial_biogenesis [03029]; Membrane_trafficking [04131]; Cytoskeleton_proteins [04812]; Messenger_RNA_biogenesis [03019]	myosin_complex [GO:0016459]; actin_filament_binding [GO:0051015]; ATP_binding [GO:0005524]; motor_activity [GO:0003774]; actin_filament_organization [GO:0007015]	GO:0003774; GO:0005524; GO:0007015; GO:0016459; GO:0051015	GO:0003774~motor_activity;GO:0005524~ATP_binding;GO:0051015~actin_filament_binding	GO:0007015~actin_filament_organization	GO:0016459~myosin_complex
gene4365	17355362	CHLNCDRAFT_15570	829.509	1532.37	1.84732	0.885433	0.00168684	0.0135073	UP	30S_ribosomal_protein_S15, chloroplastic	rps15	Coleochaete_scutata	NA	chloroplast [GO:0009507]; ribosome [GO:0005840]; structural_constituent_of_ribosome [GO:0003735]; translation [GO:0006412]	GO:0003735; GO:0005840; GO:0006412; GO:0009507	GO:0003735~structural_constituent_of_ribosome	GO:0006412~translation	GO:0005840~ribosome;GO:0009507~chloroplast
gene8540	17351143	CHLNCDRAFT_14832	2837.39	5339.59	1.88187	0.912166	0.00677576	0.0414601	UP	50S_ribosomal_protein_L22, chloroplastic	rpl22	Staurastrum_punctulatum (Green_alga) (Cosmoastrum_punctulatum)	NA	chloroplast [GO:0009507]; large_ribosomal_subunit [GO:0015934]; rRNA_binding [GO:0019843]; structural_constituent_of_ribosome [GO:0003735]; translation [GO:0006412]	GO:0003735; GO:0006412; GO:0009507; GO:0015934; GO:0019843	GO:0003735~structural_constituent_of_ribosome;GO:0019843~rRNA_binding	GO:0006412~translation	GO:0009507~chloroplast;GO:0015934~large_ribosomal_subunit
gene2861	17356406	CHLNCDRAFT_34831	1888.93	3539.38	1.87374	0.905923	0.00457153	0.0305987	UP	50S_ribosomal_protein_L6, chloroplastic	rpl6_FVCPDNA_124	Fucus_vesiculosus (Bladder_wrack)	NA	chloroplast [GO:0009507]; ribosome [GO:0005840]; rRNA_binding [GO:0019843]; structural_constituent_of_ribosome [GO:0003735]; translation [GO:0006412]	GO:0003735; GO:0005840; GO:0006412; GO:0009507; GO:0019843	GO:0003735~structural_constituent_of_ribosome;GO:0019843~rRNA_binding	GO:0006412~translation	GO:0005840~ribosome;GO:0009507~chloroplast
gene2993	17356710	CHLNCDRAFT_21648	115.952	411.081	3.54527	1.82589	9.97752e-10	4.03503e-08	UP	Acetoacetyl-CoA_synthetase / Long-chain-fatty-acid--CoA_ligase (EC_6.2.1.16) (EC_6.2.1.3)	BN1012_Phect2379	Candidatus_Phaeomarinobacter_ectocarpi	NA	acetoacetate-CoA_ligase_activity [GO:0030729]; acyl-CoA_ligase_activity [GO:0003996]; decanoate-CoA_ligase_activity [GO:0102391]; long-chain_fatty_acid-CoA_ligase_activity [GO:0004467]	GO:0003996; GO:0004467; GO:0030729; GO:0102391	GO:0003996~acyl-CoA_ligase_activity;GO:0004467~long-chain_fatty_acid-CoA_ligase_activity;GO:0030729~acetoacetate-CoA_ligase_activity	NA	NA
gene3575	17356180	CHLNCDRAFT_144431	749.382	1279.84	1.70786	0.772188	0.0053218	0.0343774	UP	Aldo/keto_reductase	Esi_0257_0008	Ectocarpus_siliculosus (Brown_alga) (Conferva_siliculosa)	NA	NA	NA	NA	NA	NA
gene8180	17351418	CHLNCDRAFT_37081	177.27	1256.36	7.08725	2.82522	1.06159e-22	2.174e-20	UP	ARC5, dynamin-related_protein_involved_in_plastid_division	ARC5_Esi_0121_0052	Ectocarpus_siliculosus (Brown_alga) (Conferva_siliculosa)	NA	GTP_binding [GO:0005525]; GTPase_activity [GO:0003924]	GO:0003924; GO:0005525	GO:0003924~GTPase_activity;GO:0005525~GTP_binding	NA	NA
gene5284	17354383	CHLNCDRAFT_48889	2.58144	26.5694	10.2925	3.36352	3.75898e-05	0.000530502	UP	CoA-disulfide_reductase / polysulfide_binding_protein_and_transferase_domain_protein (EC_1.8.1.14)	REIFOR_00899	Reinekea_forsetii	NA	cell [GO:0005623]; CoA-disulfide_reductase_activity [GO:0050451]; flavin_adenine_dinucleotide_binding [GO:0050660]; transferase_activity [GO:0016740]; cell_redox_homeostasis [GO:0045454]	GO:0005623; GO:0016740; GO:0045454; GO:0050451; GO:0050660	GO:0016740~transferase_activity;GO:0050451~CoA-disulfide_reductase_activity;GO:0050660~flavin_adenine_dinucleotide_binding	GO:0045454~cell_redox_homeostasis	GO:0005623~cell
gene3545	17356133	CHLNCDRAFT_51607	471.728	854.343	1.81109	0.856861	0.00150628	0.0122346	UP	DEAD/DEAH_box_helicase	phytr_10910	Candidatus_Phycorickettsia_trachydisci	NA	ATP_binding [GO:0005524]; helicase_activity [GO:0004386]; nucleic_acid_binding [GO:0003676]	GO:0003676; GO:0004386; GO:0005524	GO:0003676~nucleic_acid_binding;GO:0004386~helicase_activity;GO:0005524~ATP_binding	NA	NA
gene2358	17357091	CHLNCDRAFT_57183	200.811	383.764	1.91107	0.934384	0.00108161	0.00929509	UP	Decarboxylase	decarboxylase_Esi_0089_0024	Ectocarpus_siliculosus (Brown_alga) (Conferva_siliculosa)	NA	catalytic_activity [GO:0003824]	GO:0003824	GO:0003824~catalytic_activity	NA	NA
gene4602	17355174	CHLNCDRAFT_133943	256.281	441.46	1.72256	0.784555	0.00442187	0.0296795	UP	DNA-directed_RNA_polymerase_subunit (EC_2.7.7.6)	RPA_Esi_0183_0035	Ectocarpus_siliculosus (Brown_alga) (Conferva_siliculosa)	NA	nucleus [GO:0005634]; DNA_binding [GO:0003677]; DNA-directed_5'-3' RNA_polymerase_activity [GO:0003899]; zinc_ion_binding [GO:0008270]; transcription, DNA-templated [GO:0006351]	GO:0003677; GO:0003899; GO:0005634; GO:0006351; GO:0008270	GO:0003677~DNA_binding;GO:0003899~DNA-directed_RNA_polymerase_activity;GO:0008270~zinc_ion_binding	GO:0006351~transcription, DNA-templated	GO:0005634~nucleus
gene316	17359445	CHLNCDRAFT_133261	195.41	408.293	2.08941	1.0631	0.000198746	0.00223473	UP	Endo-1,3-beta-glucanase, family_GH16 (EC_3.2.1.39)	Esi_0121_0080	Ectocarpus_siliculosus (Brown_alga) (Conferva_siliculosa)	NA	glucan_endo-1,3-beta-D-glucosidase_activity [GO:0042973]; carbohydrate_metabolic_process [GO:0005975]	GO:0005975; GO:0042973	GO:0042973~glucan_endo-1,3-beta-D-glucosidase_activity	GO:0005975~carbohydrate_metabolic_process	NA
gene753	17358931	CHLNCDRAFT_137680	241.87	456.001	1.88532	0.914807	0.000977864	0.00866675	UP	Expressed_protein	SdH_Esi_0000_0562	Ectocarpus_siliculosus (Brown_alga) (Conferva_siliculosa)	NA	oxidoreductase_activity [GO:0016491]	GO:0016491	GO:0016491~oxidoreductase_activity	NA	NA
gene4682	17354922	CHLNCDRAFT_52380	295.984	561.703	1.89775	0.924289	0.000665858	0.00631417	UP	GDT1_family_protein	Esi_0053_0007	Ectocarpus_siliculosus (Brown_alga) (Conferva_siliculosa)	NA	integral_component_of_membrane [GO:0016021]	GO:0016021	NA	NA	GO:0016021~integral_component_of_membrane
gene5757	17353589	CHLNCDRAFT_24776	135.985	417.365	3.06919	1.61786	3.55064e-08	1.05154e-06	UP	Glutaredoxin (EC_1.20.4.1)	GRX_Esi_0197_0012	Ectocarpus_siliculosus (Brown_alga) (Conferva_siliculosa)	NA	cell [GO:0005623]; arsenate_reductase (glutaredoxin) activity [GO:0008794]; electron_transfer_activity [GO:0009055]; protein_disulfide_oxidoreductase_activity [GO:0015035]; cell_redox_homeostasis [GO:0045454]	GO:0005623; GO:0008794; GO:0009055; GO:0015035; GO:0045454	GO:0008794~arsenate_reductase (glutaredoxin) activity;GO:0009055~electron_carrier_activity;GO:0015035~protein_disulfide_oxidoreductase_activity	GO:0045454~cell_redox_homeostasis	GO:0005623~cell
gene6404	17353069	CHLNCDRAFT_59729	218.67	460.602	2.10638	1.07476	0.000118408	0.0014257	UP	Glyoxylate/hydroxypyruvate_reductase_A	LX95_01120	Mesonia_algae	NA	NAD_binding [GO:0051287]; oxidation-reduction_process [GO:0055114]	GO:0051287; GO:0055114	GO:0051287~NAD_binding	GO:0055114~oxidation-reduction_process	NA
gene4246	17355390	CHLNCDRAFT_22679	91.7984	208.921	2.27587	1.18642	0.000687668	0.00646368	UP	Haloacid_dehalogenase-like_hydrolase	Esi_0206_0037	Ectocarpus_siliculosus (Brown_alga) (Conferva_siliculosa)	NA	hydrolase_activity [GO:0016787]	GO:0016787	GO:0016787~hydrolase_activity	NA	NA
gene1032	17358492	CHLNCDRAFT_29581	1421.35	9324.18	6.56007	2.71371	8.13928e-14	6.12036e-12	UP	Hybrid-cluster_protein	HCP	Yamagishiella_unicocca	NA	cytoplasm [GO:0005737]; iron-sulfur_cluster_binding [GO:0051536]; oxidoreductase_activity, acting_on_other_nitrogenous_compounds_as_donors [GO:0016661]	GO:0005737; GO:0016661; GO:0051536	GO:0016661~oxidoreductase_activity, acting_on_other_nitrogenous_compounds_as_donors;GO:0051536~iron-sulfur_cluster_binding	NA	GO:0005737~cytoplasm
gene4747	17354866	CHLNCDRAFT_134121	17.2131	109.397	6.35543	2.66799	1.35046e-07	3.46618e-06	UP	Lignostilbene-alpha_beta-dioxygenase	Esi_0155_0052	Ectocarpus_siliculosus (Brown_alga) (Conferva_siliculosa)	NA	metal_ion_binding [GO:0046872]; oxidoreductase_activity, acting_on_single_donors_with_incorporation_of_molecular_oxygen, incorporation_of_two_atoms_of_oxygen [GO:0016702]	GO:0016702; GO:0046872	GO:0016702~oxidoreductase_activity, acting_on_single_donors_with_incorporation_of_molecular_oxygen, incorporation_of_two_atoms_of_oxygen;GO:0046872~metal_ion_binding	NA	NA
gene9324	17350269	CHLNCDRAFT_141743	71.7808	166.481	2.3193	1.21369	0.00167662	0.0134367	UP	Lipolytic_enzyme, G-D-S-L	Esi_0061_0125	Ectocarpus_siliculosus (Brown_alga) (Conferva_siliculosa)	NA	integral_component_of_membrane [GO:0016021]	GO:0016021	NA	NA	GO:0016021~integral_component_of_membrane
gene7489	17352027	CHLNCDRAFT_138549	761.354	1474.49	1.93666	0.953573	0.000641467	0.00613555	UP	Multidrug_resistance-associated_protein-like_protein	Esi_0077_0055	Ectocarpus_siliculosus (Brown_alga) (Conferva_siliculosa)	NA	integral_component_of_membrane [GO:0016021]; ATP_binding [GO:0005524]; ATPase_activity, coupled_to_transmembrane_movement_of_substances [GO:0042626]	GO:0005524; GO:0016021; GO:0042626	GO:0005524~ATP_binding;GO:0042626~ATPase_activity, coupled_to_transmembrane_movement_of_substances	NA	GO:0016021~integral_component_of_membrane
gene6400	17353125	CHLNCDRAFT_136336	425.31	707.629	1.6638	0.734479	0.00611712	0.0383066	UP	Myb-related_protein_2 (Myb_family_transcription_factor_PHL9) (Protein_NITROGEN_STARVATION_RESPONSE_1) (AtNSR1) (Protein_PHR1-LIKE_9)	MYR2_NSR1_PHL9_At3g04030_T11I18.14	Arabidopsis_thaliana (Mouse-ear_cress)	NA	nucleus [GO:0005634]; DNA_binding [GO:0003677]; DNA-binding_transcription_factor_activity [GO:0003700]	GO:0003677; GO:0003700; GO:0005634	GO:0003677~DNA_binding;GO:0003700~sequence-specific_DNA_binding_transcription_factor_activity	NA	GO:0005634~nucleus
gene8325	17351184	CHLNCDRAFT_139670	419.293	680.185	1.62222	0.697969	0.00830266	0.0488168	UP	NA	NA	NA	NA	NA	NA	NA	NA	NA
gene7342	17352346	CHLNCDRAFT_138348	326.82	535.465	1.63841	0.712297	0.00778869	0.0464298	UP	NA	NA	NA	NA	NA	NA	NA	NA	NA
gene6631	17352891	CHLNCDRAFT_136679	297.79	488.679	1.64102	0.714593	0.00852635	0.0498579	UP	NA	NA	NA	NA	NA	NA	NA	NA	NA
gene1311	17358361	CHLNCDRAFT_140353	354.378	581.618	1.64124	0.714782	0.00779539	0.0464298	UP	NA	NA	NA	NA	NA	NA	NA	NA	NA
gene5868	17353672	CHLNCDRAFT_58265	431.482	708.574	1.64219	0.715618	0.00824978	0.0485652	UP	NA	NA	NA	NA	NA	NA	NA	NA	NA
gene8678	17350952	CHLNCDRAFT_140160	432.169	709.922	1.6427	0.716066	0.00773826	0.046204	UP	NA	NA	NA	NA	NA	NA	NA	NA	NA
gene5020	17354626	CHLNCDRAFT_57999	605.22	995.811	1.64537	0.718411	0.00833324	0.0489623	UP	NA	NA	NA	NA	NA	NA	NA	NA	NA
gene305	17359604	CHLNCDRAFT_49502	455.232	754.36	1.65709	0.728651	0.00716134	0.0434328	UP	NA	NA	NA	NA	NA	NA	NA	NA	NA
gene3543	17356116	CHLNCDRAFT_13313	643.683	1067.03	1.6577	0.729183	0.00752361	0.0450901	UP	NA	NA	NA	NA	NA	NA	NA	NA	NA
gene2526	17357222	CHLNCDRAFT_48645	395.851	657.158	1.66012	0.731285	0.00679153	0.0415301	UP	NA	NA	NA	NA	NA	NA	NA	NA	NA
gene1715	17358211	CHLNCDRAFT_140842	474.505	787.837	1.66034	0.731476	0.006286	0.03914	UP	NA	NA	NA	NA	NA	NA	NA	NA	NA
gene3768	17355667	CHLNCDRAFT_17725	249.304	414.621	1.66311	0.733884	0.00837383	0.0491152	UP	NA	NA	NA	NA	NA	NA	NA	NA	NA
gene7852	17351663	CHLNCDRAFT_139033	368.64	614.368	1.66658	0.736891	0.00646055	0.0399889	UP	NA	NA	NA	NA	NA	NA	NA	NA	NA
gene3300	17356284	CHLNCDRAFT_144091	277.337	462.238	1.6667	0.736996	0.00766239	0.0458078	UP	NA	NA	NA	NA	NA	NA	NA	NA	NA
gene1873	17357566	CHLNCDRAFT_141940	389.267	649.766	1.6692	0.73916	0.00623513	0.038919	UP	NA	NA	NA	NA	NA	NA	NA	NA	NA
gene597	17359230	CHLNCDRAFT_133653	654.431	1093.36	1.6707	0.740454	0.00633122	0.0393402	UP	NA	NA	NA	NA	NA	NA	NA	NA	NA
gene9568	17350053	CHLNCDRAFT_59480	560.659	937.072	1.67138	0.741036	0.00641877	0.0397815	UP	NA	NA	NA	NA	NA	NA	NA	NA	NA
gene2154	17357394	CHLNCDRAFT_142267	360.825	604.035	1.67404	0.743334	0.00571061	0.0363523	UP	NA	NA	NA	NA	NA	NA	NA	NA	NA
gene7841	17351760	CHLNCDRAFT_58892	372.341	623.345	1.67412	0.743406	0.0053606	0.0346048	UP	NA	NA	NA	NA	NA	NA	NA	NA	NA
gene3115	17356697	CHLNCDRAFT_143780	286.553	480.436	1.6766	0.745539	0.0065865	0.0405409	UP	NA	NA	NA	NA	NA	NA	NA	NA	NA
gene9211	17350368	CHLNCDRAFT_141593	925.885	1553.22	1.67755	0.746355	0.00844544	0.0494148	UP	NA	NA	NA	NA	NA	NA	NA	NA	NA
gene6826	17352800	CHLNCDRAFT_136953	282.948	474.734	1.67781	0.74658	0.00713089	0.0433027	UP	NA	NA	NA	NA	NA	NA	NA	NA	NA
gene4232	17355349	CHLNCDRAFT_52070	333.246	559.152	1.6779	0.746653	0.00540426	0.0348381	UP	NA	NA	NA	NA	NA	NA	NA	NA	NA
gene2262	17357381	CHLNCDRAFT_34496	295.611	496.162	1.67843	0.747111	0.00610026	0.0382259	UP	NA	NA	NA	NA	NA	NA	NA	NA	NA
gene6481	17353251	CHLNCDRAFT_58458	320.285	537.634	1.67861	0.747268	0.00588157	0.0371945	UP	NA	NA	NA	NA	NA	NA	NA	NA	NA
gene6260	17353487	CHLNCDRAFT_136145	472.017	793.065	1.68016	0.748602	0.0051106	0.0332812	UP	NA	NA	NA	NA	NA	NA	NA	NA	NA
gene5718	17354149	CHLNCDRAFT_135426	411.246	692.114	1.68297	0.751008	0.00549942	0.0353351	UP	NA	NA	NA	NA	NA	NA	NA	NA	NA
gene3177	17356377	CHLNCDRAFT_57428	392.843	661.439	1.68372	0.751653	0.00487136	0.0320703	UP	NA	NA	NA	NA	NA	NA	NA	NA	NA
gene6120	17353379	CHLNCDRAFT_25289	224.205	377.565	1.68401	0.751905	0.00737833	0.0443575	UP	NA	NA	NA	NA	NA	NA	NA	NA	NA
gene6887	17352638	CHLNCDRAFT_53886	242.247	409.314	1.68966	0.75673	0.00654135	0.0403593	UP	NA	NA	NA	NA	NA	NA	NA	NA	NA
gene3125	17356741	CHLNCDRAFT_15244	390.099	659.587	1.69082	0.757721	0.00471191	0.0313638	UP	NA	NA	NA	NA	NA	NA	NA	NA	NA
gene3252	17356492	CHLNCDRAFT_21722	356.984	604.539	1.69346	0.759975	0.00499048	0.0326092	UP	NA	NA	NA	NA	NA	NA	NA	NA	NA
gene6240	17353471	CHLNCDRAFT_136123	548.08	929.371	1.69568	0.761867	0.00477542	0.0316033	UP	NA	NA	NA	NA	NA	NA	NA	NA	NA
gene7611	17352004	CHLNCDRAFT_54365	375.57	636.897	1.69582	0.761981	0.00480115	0.0316948	UP	NA	NA	NA	NA	NA	NA	NA	NA	NA
gene8852	17350754	CHLNCDRAFT_141132	1017.8	1729.1	1.69886	0.764566	0.00789065	0.0467657	UP	NA	NA	NA	NA	NA	NA	NA	NA	NA
gene8400	17351211	CHLNCDRAFT_54861	983.382	1671.41	1.69966	0.765246	0.00737036	0.0443373	UP	NA	NA	NA	NA	NA	NA	NA	NA	NA
gene939	17358537	CHLNCDRAFT_137899	304.918	518.326	1.69989	0.765438	0.00437513	0.0294274	UP	NA	NA	NA	NA	NA	NA	NA	NA	NA
gene7427	17352243	CHLNCDRAFT_138454	220.849	377.3	1.7084	0.772648	0.00574107	0.0364901	UP	NA	NA	NA	NA	NA	NA	NA	NA	NA
gene4538	17354870	CHLNCDRAFT_133858	686.593	1173.74	1.70952	0.773591	0.00474858	0.031499	UP	NA	NA	NA	NA	NA	NA	NA	NA	NA
gene61	17359063	CHLNCDRAFT_132943	200.903	343.824	1.71139	0.775168	0.00753799	0.0451482	UP	NA	NA	NA	NA	NA	NA	NA	NA	NA
gene9142	17350430	CHLNCDRAFT_141499	365.655	626.109	1.71229	0.77593	0.00393989	0.0272033	UP	NA	NA	NA	NA	NA	NA	NA	NA	NA
gene5047	17354677	CHLNCDRAFT_23493	364.932	626.71	1.71733	0.780171	0.00365924	0.0255949	UP	NA	NA	NA	NA	NA	NA	NA	NA	NA
gene2010	17357650	CHLNCDRAFT_20354	620.187	1066.96	1.72038	0.782728	0.00388179	0.0268599	UP	NA	NA	NA	NA	NA	NA	NA	NA	NA
gene8919	17350716	CHLNCDRAFT_28208	315.393	543.229	1.72239	0.784409	0.00365777	0.0255949	UP	NA	NA	NA	NA	NA	NA	NA	NA	NA
gene7360	17352339	CHLNCDRAFT_138369	314.056	541.001	1.72263	0.78461	0.00379991	0.0263692	UP	NA	NA	NA	NA	NA	NA	NA	NA	NA
gene6726	17352859	CHLNCDRAFT_136795	243.991	420.401	1.72302	0.78494	0.00487908	0.0320852	UP	NA	NA	NA	NA	NA	NA	NA	NA	NA
gene124	17359017	CHLNCDRAFT_133025	516.382	890.44	1.72438	0.786081	0.00342709	0.0243438	UP	NA	NA	NA	NA	NA	NA	NA	NA	NA
gene2926	17356539	CHLNCDRAFT_143515	625.557	1081.53	1.72891	0.789862	0.00372147	0.0259184	UP	NA	NA	NA	NA	NA	NA	NA	NA	NA
gene1907	17357595	CHLNCDRAFT_141982	738.101	1278.47	1.73211	0.792533	0.0040278	0.0277216	UP	NA	NA	NA	NA	NA	NA	NA	NA	NA
gene159	17359335	CHLNCDRAFT_133067	899.128	1557.55	1.73229	0.792681	0.00510231	0.0332496	UP	NA	NA	NA	NA	NA	NA	NA	NA	NA
gene9345	17350281	CHLNCDRAFT_28677	274.216	475.106	1.7326	0.792937	0.00408854	0.0280087	UP	NA	NA	NA	NA	NA	NA	NA	NA	NA
gene9395	17350232	CHLNCDRAFT_141850	242.543	421.802	1.73908	0.798325	0.00432203	0.0292131	UP	NA	NA	NA	NA	NA	NA	NA	NA	NA
gene6281	17353535	CHLNCDRAFT_136172	426.615	741.927	1.7391	0.798343	0.00276752	0.0206492	UP	NA	NA	NA	NA	NA	NA	NA	NA	NA
gene9145	17350424	CHLNCDRAFT_141502	240.698	418.79	1.7399	0.799001	0.00482861	0.0318325	UP	NA	NA	NA	NA	NA	NA	NA	NA	NA
gene8779	17350853	CHLNCDRAFT_140992	461.725	804.104	1.74152	0.800348	0.00297733	0.0218754	UP	NA	NA	NA	NA	NA	NA	NA	NA	NA
gene3912	17355534	CHLNCDRAFT_144947	473.093	824.165	1.74208	0.800808	0.0030226	0.0221068	UP	NA	NA	NA	NA	NA	NA	NA	NA	NA
gene893	17358554	CHLNCDRAFT_137851	677.971	1181.13	1.74215	0.800866	0.00320886	0.023117	UP	NA	NA	NA	NA	NA	NA	NA	NA	NA
gene1232	17358718	CHLNCDRAFT_138247	320.415	558.275	1.74235	0.801036	0.00301726	0.0220845	UP	NA	NA	NA	NA	NA	NA	NA	NA	NA
gene3637	17356125	CHLNCDRAFT_144518	1121.83	1955.8	1.74341	0.801912	0.00639742	0.0397003	UP	NA	NA	NA	NA	NA	NA	NA	NA	NA
gene4483	17354973	CHLNCDRAFT_52262	264.492	462.068	1.747	0.80488	0.00374143	0.0260197	UP	NA	NA	NA	NA	NA	NA	NA	NA	NA
gene3196	17356405	CHLNCDRAFT_143882	760.034	1329.89	1.74978	0.80717	0.00384396	0.0266365	UP	NA	NA	NA	NA	NA	NA	NA	NA	NA
gene4989	17354825	CHLNCDRAFT_134468	1082.31	1894.46	1.75038	0.807671	0.00520928	0.0338322	UP	NA	NA	NA	NA	NA	NA	NA	NA	NA
gene7432	17352257	CHLNCDRAFT_138459	196.461	344.165	1.75182	0.808854	0.00542981	0.0349578	UP	NA	NA	NA	NA	NA	NA	NA	NA	NA
gene4428	17355121	CHLNCDRAFT_52218	348.413	610.972	1.75359	0.810309	0.00289769	0.0214046	UP	NA	NA	NA	NA	NA	NA	NA	NA	NA
gene6514	17353048	CHLNCDRAFT_136504	386.133	678.754	1.75782	0.81379	0.00244011	0.0184494	UP	NA	NA	NA	NA	NA	NA	NA	NA	NA
gene8313	17351238	CHLNCDRAFT_59780	1649.87	2900.78	1.75818	0.814087	0.00833758	0.0489623	UP	NA	NA	NA	NA	NA	NA	NA	NA	NA
gene5037	17354609	CHLNCDRAFT_134543	174.196	306.393	1.7589	0.81467	0.00626881	0.0390785	UP	NA	NA	NA	NA	NA	NA	NA	NA	NA
gene2446	17357153	CHLNCDRAFT_50917	328.646	579.191	1.76236	0.817507	0.00237515	0.0180718	UP	NA	NA	NA	NA	NA	NA	NA	NA	NA
gene5807	17353882	CHLNCDRAFT_13101	176.322	311.402	1.7661	0.820564	0.00591249	0.037341	UP	NA	NA	NA	NA	NA	NA	NA	NA	NA
gene7917	17351763	CHLNCDRAFT_139112	504.646	894.656	1.77284	0.826063	0.0021494	0.0165504	UP	NA	NA	NA	NA	NA	NA	NA	NA	NA
gene3911	17355766	CHLNCDRAFT_144946	162.372	288.13	1.77451	0.827419	0.00768751	0.0459294	UP	NA	NA	NA	NA	NA	NA	NA	NA	NA
gene3331	17355962	CHLNCDRAFT_144126	183.813	326.587	1.77674	0.829229	0.00477716	0.0316033	UP	NA	NA	NA	NA	NA	NA	NA	NA	NA
gene9203	17350397	CHLNCDRAFT_141584	173.322	308.319	1.77888	0.830968	0.00554333	0.0355697	UP	NA	NA	NA	NA	NA	NA	NA	NA	NA
gene7421	17352177	CHLNCDRAFT_58765	192.816	343.101	1.77942	0.831409	0.00447289	0.0300011	UP	NA	NA	NA	NA	NA	NA	NA	NA	NA
gene7664	17351916	CHLNCDRAFT_138794	436.637	777.201	1.77997	0.831851	0.00211241	0.0163309	UP	NA	NA	NA	NA	NA	NA	NA	NA	NA
gene7778	17351956	CHLNCDRAFT_138925	299.982	534.014	1.78016	0.832004	0.0023949	0.018179	UP	NA	NA	NA	NA	NA	NA	NA	NA	NA
gene4311	17355413	CHLNCDRAFT_145474	165.415	294.626	1.78113	0.832791	0.00555978	0.0356515	UP	NA	NA	NA	NA	NA	NA	NA	NA	NA
gene2089	17357402	CHLNCDRAFT_50676	303.199	540.29	1.78197	0.833471	0.00210689	0.0163013	UP	NA	NA	NA	NA	NA	NA	NA	NA	NA
gene7987	17351682	CHLNCDRAFT_139206	344.78	615.036	1.78385	0.834994	0.00196038	0.0152907	UP	NA	NA	NA	NA	NA	NA	NA	NA	NA
gene6850	17352580	CHLNCDRAFT_26066	256.041	457.053	1.78507	0.835984	0.00240557	0.0182312	UP	NA	NA	NA	NA	NA	NA	NA	NA	NA
gene1961	17357424	CHLNCDRAFT_142043	585.655	1045.61	1.78536	0.836217	0.00208552	0.0161758	UP	NA	NA	NA	NA	NA	NA	NA	NA	NA
gene2821	17356819	CHLNCDRAFT_51167	215.059	384.853	1.78952	0.839576	0.00284913	0.0211424	UP	NA	NA	NA	NA	NA	NA	NA	NA	NA
gene5350	17354231	CHLNCDRAFT_134935	885.626	1588.77	1.79395	0.843142	0.00307972	0.0223973	UP	NA	NA	NA	NA	NA	NA	NA	NA	NA
gene3887	17355613	CHLNCDRAFT_144915	218.084	391.286	1.79419	0.843337	0.00311201	0.0225551	UP	NA	NA	NA	NA	NA	NA	NA	NA	NA
gene8366	17351288	CHLNCDRAFT_27560	1464.51	2632.09	1.79725	0.845789	0.00576745	0.0365931	UP	NA	NA	NA	NA	NA	NA	NA	NA	NA
gene8374	17351201	CHLNCDRAFT_139725	1446.61	2601.36	1.79825	0.84659	0.00568668	0.0362704	UP	NA	NA	NA	NA	NA	NA	NA	NA	NA
gene744	17358582	CHLNCDRAFT_137670	178.515	321.071	1.79857	0.846851	0.0047443	0.0314971	UP	NA	NA	NA	NA	NA	NA	NA	NA	NA
gene7579	17352146	CHLNCDRAFT_138674	155.96	280.919	1.80123	0.848985	0.00586557	0.0371302	UP	NA	NA	NA	NA	NA	NA	NA	NA	NA
gene6990	17352774	CHLNCDRAFT_137152	144.894	261.384	1.80397	0.851177	0.00671687	0.0411783	UP	NA	NA	NA	NA	NA	NA	NA	NA	NA
gene2955	17356661	CHLNCDRAFT_21564	512.507	925.901	1.80661	0.853285	0.00147441	0.0120469	UP	NA	NA	NA	NA	NA	NA	NA	NA	NA
gene4536	17355062	CHLNCDRAFT_133856	1678.27	3032.27	1.80678	0.853421	0.006481	0.0400383	UP	NA	NA	NA	NA	NA	NA	NA	NA	NA
gene6996	17352728	CHLNCDRAFT_137158	1281.65	2327.69	1.81617	0.8609	0.00415836	0.0283644	UP	NA	NA	NA	NA	NA	NA	NA	NA	NA
gene7341	17352334	CHLNCDRAFT_138347	403.728	733.658	1.81721	0.861722	0.00116846	0.00987848	UP	NA	NA	NA	NA	NA	NA	NA	NA	NA
gene9269	17350308	CHLNCDRAFT_141673	176.032	320.06	1.81819	0.862505	0.00419497	0.0285425	UP	NA	NA	NA	NA	NA	NA	NA	NA	NA
gene773	17358911	CHLNCDRAFT_137706	394.079	717.369	1.82037	0.864233	0.00119575	0.010078	UP	NA	NA	NA	NA	NA	NA	NA	NA	NA
gene3140	17356376	CHLNCDRAFT_57419	738.99	1347.63	1.82361	0.866798	0.00178285	0.0141234	UP	NA	NA	NA	NA	NA	NA	NA	NA	NA
gene4733	17354935	CHLNCDRAFT_134103	415.469	758.045	1.82455	0.867544	0.00126726	0.0105788	UP	NA	NA	NA	NA	NA	NA	NA	NA	NA
gene7244	17352469	CHLNCDRAFT_137495	248.359	453.433	1.82572	0.868465	0.0017167	0.0137009	UP	NA	NA	NA	NA	NA	NA	NA	NA	NA
gene8161	17351313	CHLNCDRAFT_59045	2130.81	3890.4	1.82578	0.868516	0.00735537	0.044298	UP	NA	NA	NA	NA	NA	NA	NA	NA	NA
gene7228	17352457	CHLNCDRAFT_54100	154.16	281.813	1.82806	0.870312	0.00415373	0.0283543	UP	NA	NA	NA	NA	NA	NA	NA	NA	NA
gene409	17359270	CHLNCDRAFT_133389	1151.27	2109.76	1.83255	0.873855	0.00299712	0.0219933	UP	NA	NA	NA	NA	NA	NA	NA	NA	NA
gene4238	17355386	CHLNCDRAFT_8794	143.145	262.55	1.83415	0.875113	0.00563339	0.0360275	UP	NA	NA	NA	NA	NA	NA	NA	NA	NA
gene4379	17355444	CHLNCDRAFT_22742	260	476.904	1.83424	0.875185	0.00147594	0.0120491	UP	NA	NA	NA	NA	NA	NA	NA	NA	NA
gene1119	17358770	CHLNCDRAFT_33921	339.244	622.281	1.83431	0.87524	0.00113747	0.009663	UP	NA	NA	NA	NA	NA	NA	NA	NA	NA
gene9025	17350630	CHLNCDRAFT_141332	188.553	345.961	1.83482	0.875642	0.00278284	0.0207351	UP	NA	NA	NA	NA	NA	NA	NA	NA	NA
gene7326	17352267	CHLNCDRAFT_138328	306.377	562.546	1.83612	0.876662	0.00111151	0.00949267	UP	NA	NA	NA	NA	NA	NA	NA	NA	NA
gene6330	17353391	CHLNCDRAFT_136232	213.21	392.427	1.84057	0.880151	0.00188151	0.0147713	UP	NA	NA	NA	NA	NA	NA	NA	NA	NA
gene5596	17354051	CHLNCDRAFT_13754	216.051	397.955	1.84195	0.881233	0.00178278	0.0141234	UP	NA	NA	NA	NA	NA	NA	NA	NA	NA
gene8792	17350844	CHLNCDRAFT_141021	129.514	238.841	1.84413	0.88294	0.00667289	0.0409608	UP	NA	NA	NA	NA	NA	NA	NA	NA	NA
gene4466	17355000	CHLNCDRAFT_23239	2795.36	5158.78	1.84548	0.883993	0.00797551	0.0471815	UP	NA	NA	NA	NA	NA	NA	NA	NA	NA
gene2811	17357030	CHLNCDRAFT_34805	917.596	1693.91	1.84603	0.884429	0.00205046	0.0159674	UP	NA	NA	NA	NA	NA	NA	NA	NA	NA
gene5561	17354064	CHLNCDRAFT_58154	791.756	1462.83	1.84758	0.885638	0.00154811	0.012511	UP	NA	NA	NA	NA	NA	NA	NA	NA	NA
gene6411	17353179	CHLNCDRAFT_136352	316.038	584.268	1.84873	0.886532	0.00115494	0.00978314	UP	NA	NA	NA	NA	NA	NA	NA	NA	NA
gene6382	17353263	CHLNCDRAFT_58426	904.06	1672.35	1.84982	0.887386	0.00181952	0.014402	UP	NA	NA	NA	NA	NA	NA	NA	NA	NA
gene4505	17355140	CHLNCDRAFT_133822	734.695	1362.91	1.85506	0.891469	0.00137719	0.0113703	UP	NA	NA	NA	NA	NA	NA	NA	NA	NA
gene4795	17354620	CHLNCDRAFT_134199	452.586	840.199	1.85644	0.89254	0.000843054	0.00773429	UP	NA	NA	NA	NA	NA	NA	NA	NA	NA
gene6785	17352768	CHLNCDRAFT_58573	1722.03	3200.37	1.85849	0.894134	0.00424769	0.0288322	UP	NA	NA	NA	NA	NA	NA	NA	NA	NA
gene4525	17355042	CHLNCDRAFT_57834	323.608	601.468	1.85863	0.894238	0.00101545	0.00884339	UP	NA	NA	NA	NA	NA	NA	NA	NA	NA
gene6883	17352648	CHLNCDRAFT_137023	465.346	865.461	1.85982	0.895166	0.000943509	0.00843201	UP	NA	NA	NA	NA	NA	NA	NA	NA	NA
gene7645	17351901	CHLNCDRAFT_54386	611.59	1138.63	1.86175	0.896663	0.00105201	0.00908936	UP	NA	NA	NA	NA	NA	NA	NA	NA	NA
gene7070	17352356	CHLNCDRAFT_137265	239.204	446.517	1.86668	0.900471	0.00113182	0.00963202	UP	NA	NA	NA	NA	NA	NA	NA	NA	NA
gene3384	17356021	CHLNCDRAFT_144189	247.264	461.859	1.86788	0.901403	0.00107321	0.00923765	UP	NA	NA	NA	NA	NA	NA	NA	NA	NA
gene1657	17358289	CHLNCDRAFT_50396	179.715	335.709	1.86801	0.901503	0.00214788	0.0165504	UP	NA	NA	NA	NA	NA	NA	NA	NA	NA
gene7904	17351711	CHLNCDRAFT_139098	464.084	867.19	1.8686	0.901961	0.000845348	0.00773429	UP	NA	NA	NA	NA	NA	NA	NA	NA	NA
gene4914	17354782	CHLNCDRAFT_134353	1620.39	3029.74	1.86976	0.902855	0.00382155	0.0265003	UP	NA	NA	NA	NA	NA	NA	NA	NA	NA
gene6617	17352908	CHLNCDRAFT_136659	269.679	504.256	1.86984	0.902913	0.00104864	0.00908202	UP	NA	NA	NA	NA	NA	NA	NA	NA	NA
gene9170	17350484	CHLNCDRAFT_141538	287.674	538.353	1.8714	0.904115	0.000905131	0.00814957	UP	NA	NA	NA	NA	NA	NA	NA	NA	NA
gene772	17358886	CHLNCDRAFT_137705	1621.05	3037.87	1.87401	0.906128	0.00350982	0.0248308	UP	NA	NA	NA	NA	NA	NA	NA	NA	NA
gene9426	17350208	CHLNCDRAFT_142511	191.289	358.62	1.87476	0.906702	0.0013691	0.0113405	UP	NA	NA	NA	NA	NA	NA	NA	NA	NA
gene7851	17351767	CHLNCDRAFT_139032	142.374	266.937	1.8749	0.90681	0.00423617	0.0287742	UP	NA	NA	NA	NA	NA	NA	NA	NA	NA
gene4753	17354966	CHLNCDRAFT_48821	641.278	1202.85	1.8757	0.90743	0.000966182	0.00861065	UP	NA	NA	NA	NA	NA	NA	NA	NA	NA
gene5959	17353786	CHLNCDRAFT_135738	590.638	1110.87	1.8808	0.911347	0.000915493	0.00822747	UP	NA	NA	NA	NA	NA	NA	NA	NA	NA
gene2559	17357255	CHLNCDRAFT_57252	619.724	1168.15	1.88496	0.914533	0.000775198	0.00719506	UP	NA	NA	NA	NA	NA	NA	NA	NA	NA
gene7958	17351733	CHLNCDRAFT_139166	330.186	622.91	1.88654	0.915742	0.000708461	0.00663967	UP	NA	NA	NA	NA	NA	NA	NA	NA	NA
gene2017	17357647	CHLNCDRAFT_142107	179.01	337.874	1.88746	0.916446	0.00192689	0.015066	UP	NA	NA	NA	NA	NA	NA	NA	NA	NA
gene5021	17354632	CHLNCDRAFT_52630	733.58	1385.34	1.88847	0.917219	0.000970044	0.00861317	UP	NA	NA	NA	NA	NA	NA	NA	NA	NA
gene999	17358470	CHLNCDRAFT_19159	254.52	480.666	1.88852	0.917258	0.00101593	0.00884339	UP	NA	NA	NA	NA	NA	NA	NA	NA	NA
gene8149	17351590	CHLNCDRAFT_139426	290.066	547.991	1.8892	0.917773	0.000711315	0.00665993	UP	NA	NA	NA	NA	NA	NA	NA	NA	NA
gene5367	17354377	CHLNCDRAFT_134953	914.525	1730.39	1.89212	0.920003	0.00128291	0.0106817	UP	NA	NA	NA	NA	NA	NA	NA	NA	NA
gene4472	17355164	CHLNCDRAFT_35393	186.675	353.682	1.89464	0.921923	0.00161109	0.0129655	UP	NA	NA	NA	NA	NA	NA	NA	NA	NA
gene627	17359240	CHLNCDRAFT_56636	178.17	337.827	1.89609	0.923028	0.0018518	0.0146095	UP	NA	NA	NA	NA	NA	NA	NA	NA	NA
gene5308	17354191	CHLNCDRAFT_23828	293.239	556.14	1.89654	0.923372	0.000657784	0.0062561	UP	NA	NA	NA	NA	NA	NA	NA	NA	NA
gene243	17359139	CHLNCDRAFT_133169	130.04	246.659	1.89679	0.923559	0.00430399	0.0291732	UP	NA	NA	NA	NA	NA	NA	NA	NA	NA
gene231	17359012	CHLNCDRAFT_12877	224.991	430.894	1.91516	0.937467	0.000888566	0.00806074	UP	NA	NA	NA	NA	NA	NA	NA	NA	NA
gene8350	17351277	CHLNCDRAFT_54832	791.865	1517.76	1.9167	0.938622	0.000869673	0.00791921	UP	NA	NA	NA	NA	NA	NA	NA	NA	NA
gene3720	17355564	CHLNCDRAFT_144692	238.556	457.368	1.91723	0.939025	0.000747407	0.00696398	UP	NA	NA	NA	NA	NA	NA	NA	NA	NA
gene7553	17352126	CHLNCDRAFT_138638	200.269	384.364	1.91923	0.940531	0.00111811	0.00954059	UP	NA	NA	NA	NA	NA	NA	NA	NA	NA
gene7859	17351774	CHLNCDRAFT_58899	398.474	765.416	1.92087	0.941757	0.000459092	0.00457903	UP	NA	NA	NA	NA	NA	NA	NA	NA	NA
gene1417	17358303	CHLNCDRAFT_140481	323.083	620.695	1.92117	0.941982	0.000442248	0.00445255	UP	NA	NA	NA	NA	NA	NA	NA	NA	NA
gene2892	17356547	CHLNCDRAFT_143473	1351.65	2599.35	1.9231	0.943434	0.00208563	0.0161758	UP	NA	NA	NA	NA	NA	NA	NA	NA	NA
gene7351	17352174	CHLNCDRAFT_138360	942.722	1815.83	1.92615	0.945724	0.00104981	0.00908202	UP	NA	NA	NA	NA	NA	NA	NA	NA	NA
gene2053	17357362	CHLNCDRAFT_142150	1546.68	2982.1	1.92806	0.947152	0.00238714	0.0181343	UP	NA	NA	NA	NA	NA	NA	NA	NA	NA
gene8340	17351257	CHLNCDRAFT_32836	923.669	1788.32	1.9361	0.953153	0.000989374	0.00871246	UP	NA	NA	NA	NA	NA	NA	NA	NA	NA
gene5299	17354425	CHLNCDRAFT_134875	141.187	274.148	1.94174	0.95735	0.00259783	0.019504	UP	NA	NA	NA	NA	NA	NA	NA	NA	NA
gene4782	17354687	CHLNCDRAFT_48220	689.887	1340.98	1.94376	0.958852	0.000524387	0.0051293	UP	NA	NA	NA	NA	NA	NA	NA	NA	NA
gene4349	17355225	CHLNCDRAFT_35354	188.943	367.835	1.9468	0.961107	0.000900403	0.00811951	UP	NA	NA	NA	NA	NA	NA	NA	NA	NA
gene2838	17356875	CHLNCDRAFT_15195	125.969	245.401	1.9481	0.962068	0.00345941	0.0245009	UP	NA	NA	NA	NA	NA	NA	NA	NA	NA
gene4134	17355331	CHLNCDRAFT_14100	124.115	241.792	1.94813	0.962093	0.00281314	0.0209085	UP	NA	NA	NA	NA	NA	NA	NA	NA	NA
gene3497	17355967	CHLNCDRAFT_144331	172.588	336.316	1.94867	0.962487	0.00100625	0.00880469	UP	NA	NA	NA	NA	NA	NA	NA	NA	NA
gene5693	17354018	CHLNCDRAFT_135400	136.326	265.66	1.94871	0.962519	0.00271514	0.0203056	UP	NA	NA	NA	NA	NA	NA	NA	NA	NA
gene9566	17350057	CHLNCDRAFT_28921	121.632	237.193	1.95009	0.963542	0.00429361	0.0291233	UP	NA	NA	NA	NA	NA	NA	NA	NA	NA
gene2728	17356938	CHLNCDRAFT_143180	235.978	460.789	1.95268	0.965454	0.000539622	0.00526227	UP	NA	NA	NA	NA	NA	NA	NA	NA	NA
gene8928	17350688	CHLNCDRAFT_28254	840.983	1643.19	1.9539	0.966355	0.000686507	0.00645907	UP	NA	NA	NA	NA	NA	NA	NA	NA	NA
gene5901	17353759	CHLNCDRAFT_14457	4334.59	8475.78	1.95538	0.967452	0.00557131	0.0356972	UP	NA	NA	NA	NA	NA	NA	NA	NA	NA
gene2502	17357209	CHLNCDRAFT_142894	1615.11	3159.55	1.95624	0.968086	0.00211652	0.0163495	UP	NA	NA	NA	NA	NA	NA	NA	NA	NA
gene6273	17353507	CHLNCDRAFT_14578	111.293	217.718	1.95625	0.968093	0.00496267	0.0324716	UP	NA	NA	NA	NA	NA	NA	NA	NA	NA
gene957	17358489	CHLNCDRAFT_137921	869.302	1702.46	1.95843	0.969695	0.000641454	0.00613555	UP	NA	NA	NA	NA	NA	NA	NA	NA	NA
gene6314	17353483	CHLNCDRAFT_6829	121.427	237.907	1.95926	0.97031	0.00304432	0.0222318	UP	NA	NA	NA	NA	NA	NA	NA	NA	NA
gene4526	17355087	CHLNCDRAFT_133846	534.153	1046.72	1.95959	0.970552	0.000408564	0.00414376	UP	NA	NA	NA	NA	NA	NA	NA	NA	NA
gene1122	17358867	CHLNCDRAFT_33926	645.345	1264.82	1.95991	0.970784	0.000462853	0.00461176	UP	NA	NA	NA	NA	NA	NA	NA	NA	NA
gene3180	17356382	CHLNCDRAFT_143862	116.17	228.236	1.96467	0.974289	0.00319413	0.0230288	UP	NA	NA	NA	NA	NA	NA	NA	NA	NA
gene8850	17350764	CHLNCDRAFT_141130	174.445	343.275	1.96781	0.976589	0.00100382	0.00879943	UP	NA	NA	NA	NA	NA	NA	NA	NA	NA
gene6140	17353392	CHLNCDRAFT_135995	2305.63	4537.05	1.96782	0.976595	0.00315377	0.022789	UP	NA	NA	NA	NA	NA	NA	NA	NA	NA
gene1794	17357812	CHLNCDRAFT_13632	240.119	473.448	1.97172	0.979458	0.000418716	0.0042378	UP	NA	NA	NA	NA	NA	NA	NA	NA	NA
gene9609	17350013	CHLNCDRAFT_14498	94.005	185.412	1.97236	0.979924	0.00617711	0.0386069	UP	NA	NA	NA	NA	NA	NA	NA	NA	NA
gene5625	17354125	CHLNCDRAFT_58180	761.899	1506.11	1.97679	0.983159	0.000471372	0.00469178	UP	NA	NA	NA	NA	NA	NA	NA	NA	NA
gene1724	17358335	CHLNCDRAFT_140851	4015.17	7974.13	1.986	0.989866	0.00431628	0.0292006	UP	NA	NA	NA	NA	NA	NA	NA	NA	NA
gene362	17359327	CHLNCDRAFT_133324	435.837	865.936	1.98684	0.990472	0.000222952	0.00246657	UP	NA	NA	NA	NA	NA	NA	NA	NA	NA
gene8938	17350718	CHLNCDRAFT_59287	415.312	825.501	1.98767	0.991075	0.000244049	0.00266324	UP	NA	NA	NA	NA	NA	NA	NA	NA	NA
gene73	17359333	CHLNCDRAFT_132961	180.496	358.767	1.98768	0.991082	0.000789637	0.00731498	UP	NA	NA	NA	NA	NA	NA	NA	NA	NA
gene5543	17353992	CHLNCDRAFT_135199	514.617	1023.04	1.98796	0.991291	0.000218425	0.00242485	UP	NA	NA	NA	NA	NA	NA	NA	NA	NA
gene8890	17350660	CHLNCDRAFT_141182	1680.79	3345.46	1.9904	0.993062	0.00170571	0.0136244	UP	NA	NA	NA	NA	NA	NA	NA	NA	NA
gene9047	17350585	CHLNCDRAFT_55318	114.925	228.81	1.99095	0.993458	0.00300145	0.0220022	UP	NA	NA	NA	NA	NA	NA	NA	NA	NA
gene7985	17351710	CHLNCDRAFT_36926	8073.06	16108.9	1.99538	0.996667	0.00483639	0.0318619	UP	NA	NA	NA	NA	NA	NA	NA	NA	NA
gene3414	17356177	CHLNCDRAFT_144224	157.323	315.527	2.0056	1.00404	0.000917808	0.00824058	UP	NA	NA	NA	NA	NA	NA	NA	NA	NA
gene8584	17351066	CHLNCDRAFT_140013	139.793	280.416	2.00594	1.00428	0.0013075	0.010877	UP	NA	NA	NA	NA	NA	NA	NA	NA	NA
gene1233	17358805	CHLNCDRAFT_138249	94.245	189.291	2.0085	1.00612	0.00471064	0.0313638	UP	NA	NA	NA	NA	NA	NA	NA	NA	NA
gene2837	17356869	CHLNCDRAFT_143318	346.302	697.876	2.01522	1.01094	0.000179455	0.00204893	UP	NA	NA	NA	NA	NA	NA	NA	NA	NA
gene4064	17355597	CHLNCDRAFT_145140	267.937	540.361	2.01675	1.01203	0.000226848	0.00249818	UP	NA	NA	NA	NA	NA	NA	NA	NA	NA
gene3629	17356062	CHLNCDRAFT_144509	103.236	208.541	2.02004	1.01439	0.003229	0.0231934	UP	NA	NA	NA	NA	NA	NA	NA	NA	NA
gene4200	17355513	CHLNCDRAFT_35273	17194.9	34797.1	2.02369	1.01698	0.00335825	0.0240113	UP	NA	NA	NA	NA	NA	NA	NA	NA	NA
gene3416	17356083	CHLNCDRAFT_51536	940.626	1904.64	2.02486	1.01782	0.000449933	0.00451576	UP	NA	NA	NA	NA	NA	NA	NA	NA	NA
gene8834	17350792	CHLNCDRAFT_55184	156.919	317.775	2.02509	1.01799	0.000642559	0.00613555	UP	NA	NA	NA	NA	NA	NA	NA	NA	NA
gene868	17358549	CHLNCDRAFT_137822	410.146	832.163	2.02894	1.02073	0.000133794	0.00158397	UP	NA	NA	NA	NA	NA	NA	NA	NA	NA
gene5260	17354331	CHLNCDRAFT_23898	586.891	1192.52	2.03193	1.02285	0.000189717	0.00214574	UP	NA	NA	NA	NA	NA	NA	NA	NA	NA
gene5437	17354236	CHLNCDRAFT_135028	119.323	242.661	2.03365	1.02407	0.00187115	0.0147019	UP	NA	NA	NA	NA	NA	NA	NA	NA	NA
gene6387	17353221	CHLNCDRAFT_136324	75.337	153.493	2.03742	1.02674	0.00743127	0.0446201	UP	NA	NA	NA	NA	NA	NA	NA	NA	NA
gene7836	17351680	CHLNCDRAFT_139012	530.764	1082.2	2.03895	1.02783	0.000168501	0.00193534	UP	NA	NA	NA	NA	NA	NA	NA	NA	NA
gene7863	17351635	CHLNCDRAFT_54525	282.107	575.518	2.04007	1.02862	0.000155697	0.00180335	UP	NA	NA	NA	NA	NA	NA	NA	NA	NA
gene3024	17356474	CHLNCDRAFT_21705	102.965	210.592	2.04528	1.0323	0.00324437	0.0232611	UP	NA	NA	NA	NA	NA	NA	NA	NA	NA
gene6378	17353228	CHLNCDRAFT_53510	95.072	194.506	2.04589	1.03273	0.00351114	0.0248308	UP	NA	NA	NA	NA	NA	NA	NA	NA	NA
gene8108	17351467	CHLNCDRAFT_32710	7767.81	15897.3	2.04656	1.0332	0.00352843	0.0249165	UP	NA	NA	NA	NA	NA	NA	NA	NA	NA
gene4816	17354585	CHLNCDRAFT_134225	439.134	902.502	2.05519	1.03927	0.000117877	0.0014257	UP	NA	NA	NA	NA	NA	NA	NA	NA	NA
gene59	17359074	CHLNCDRAFT_132940	1562.9	3212.27	2.05533	1.03937	0.000876125	0.0079629	UP	NA	NA	NA	NA	NA	NA	NA	NA	NA
gene8596	17350998	CHLNCDRAFT_140028	79.2555	163.161	2.05867	1.04172	0.00569397	0.0362704	UP	NA	NA	NA	NA	NA	NA	NA	NA	NA
gene3244	17356490	CHLNCDRAFT_143946	291.219	599.676	2.05919	1.04208	0.000118499	0.0014257	UP	NA	NA	NA	NA	NA	NA	NA	NA	NA
gene2465	17357181	CHLNCDRAFT_142849	301.005	619.898	2.05943	1.04224	0.00012463	0.00149199	UP	NA	NA	NA	NA	NA	NA	NA	NA	NA
gene9021	17350583	CHLNCDRAFT_141328	8630.49	17794.6	2.06183	1.04393	0.00321116	0.023117	UP	NA	NA	NA	NA	NA	NA	NA	NA	NA
gene948	17358656	CHLNCDRAFT_137911	5244.14	10852.4	2.06944	1.04924	0.00288894	0.0213564	UP	NA	NA	NA	NA	NA	NA	NA	NA	NA
gene8054	17351558	CHLNCDRAFT_139312	6969.12	14436.7	2.07152	1.05069	0.00294252	0.0216693	UP	NA	NA	NA	NA	NA	NA	NA	NA	NA
gene3314	17355933	CHLNCDRAFT_144106	291.631	604.632	2.07328	1.05191	0.000118388	0.0014257	UP	NA	NA	NA	NA	NA	NA	NA	NA	NA
gene555	17359206	CHLNCDRAFT_18068	269.666	559.418	2.07448	1.05275	0.000114616	0.00139867	UP	NA	NA	NA	NA	NA	NA	NA	NA	NA
gene2751	17356973	CHLNCDRAFT_51116	578.477	1200.7	2.07562	1.05354	0.000118269	0.0014257	UP	NA	NA	NA	NA	NA	NA	NA	NA	NA
gene4828	17354661	CHLNCDRAFT_134242	907.105	1883.71	2.07662	1.05424	0.000282336	0.00302615	UP	NA	NA	NA	NA	NA	NA	NA	NA	NA
gene715	17358832	CHLNCDRAFT_18852	195.967	408.3	2.08352	1.05902	0.000191674	0.00216279	UP	NA	NA	NA	NA	NA	NA	NA	NA	NA
gene7850	17351659	CHLNCDRAFT_139031	184.99	385.546	2.08414	1.05945	0.000271095	0.00291955	UP	NA	NA	NA	NA	NA	NA	NA	NA	NA
gene3441	17355941	CHLNCDRAFT_144254	105.757	220.666	2.08654	1.06111	0.00212768	0.0164225	UP	NA	NA	NA	NA	NA	NA	NA	NA	NA
gene4421	17355227	CHLNCDRAFT_145628	563.926	1178.31	2.08949	1.06315	9.47084e-05	0.00118694	UP	NA	NA	NA	NA	NA	NA	NA	NA	NA
gene529	17359477	CHLNCDRAFT_18222	256.762	537.125	2.09192	1.06483	0.000109675	0.00134646	UP	NA	NA	NA	NA	NA	NA	NA	NA	NA
gene7514	17352071	CHLNCDRAFT_138586	215.439	451.073	2.09374	1.06608	0.000125926	0.00150376	UP	NA	NA	NA	NA	NA	NA	NA	NA	NA
gene980	17358794	CHLNCDRAFT_49975	287.92	604.617	2.09995	1.07035	8.09663e-05	0.00103493	UP	NA	NA	NA	NA	NA	NA	NA	NA	NA
gene6595	17352990	CHLNCDRAFT_136624	865.892	1819.21	2.10097	1.07106	0.000224716	0.00248038	UP	NA	NA	NA	NA	NA	NA	NA	NA	NA
gene894	17358972	CHLNCDRAFT_137852	262.946	552.517	2.10126	1.07125	9.6707e-05	0.00120727	UP	NA	NA	NA	NA	NA	NA	NA	NA	NA
gene1148	17358851	CHLNCDRAFT_138152	68.2958	143.558	2.102	1.07176	0.00716089	0.0434328	UP	NA	NA	NA	NA	NA	NA	NA	NA	NA
gene8881	17350676	CHLNCDRAFT_141171	149.097	313.623	2.10349	1.07279	0.000434412	0.00437824	UP	NA	NA	NA	NA	NA	NA	NA	NA	NA
gene2835	17357044	CHLNCDRAFT_7476	154.043	324.116	2.10405	1.07317	0.00045684	0.00456266	UP	NA	NA	NA	NA	NA	NA	NA	NA	NA
gene6678	17352913	CHLNCDRAFT_136730	254.084	535.78	2.10868	1.07634	0.000102435	0.0012689	UP	NA	NA	NA	NA	NA	NA	NA	NA	NA
gene2783	17356850	CHLNCDRAFT_143244	776.569	1639.44	2.11113	1.07802	0.000152835	0.00177661	UP	NA	NA	NA	NA	NA	NA	NA	NA	NA
gene2163	17357448	CHLNCDRAFT_142280	491.669	1038.07	2.11132	1.07815	7.6648e-05	0.000991582	UP	NA	NA	NA	NA	NA	NA	NA	NA	NA
gene3262	17356498	CHLNCDRAFT_51442	287.786	609.013	2.1162	1.08148	6.94887e-05	0.000909971	UP	NA	NA	NA	NA	NA	NA	NA	NA	NA
gene7066	17352405	CHLNCDRAFT_137260	146.651	312.263	2.12929	1.09037	0.000361997	0.00374648	UP	NA	NA	NA	NA	NA	NA	NA	NA	NA
gene9457	17350159	CHLNCDRAFT_55609	336.778	717.345	2.13002	1.09087	5.1953e-05	0.000705285	UP	NA	NA	NA	NA	NA	NA	NA	NA	NA
gene8317	17351275	CHLNCDRAFT_139659	1401.1	2984.72	2.13028	1.09104	0.000473262	0.00470088	UP	NA	NA	NA	NA	NA	NA	NA	NA	NA
gene8330	17351225	CHLNCDRAFT_32827	1009.45	2152.91	2.13276	1.09272	0.000222413	0.00246343	UP	NA	NA	NA	NA	NA	NA	NA	NA	NA
gene1859	17357560	CHLNCDRAFT_141918	2064.35	4404.31	2.13352	1.09323	0.000922183	0.00827214	UP	NA	NA	NA	NA	NA	NA	NA	NA	NA
gene1460	17358014	CHLNCDRAFT_14597	164.107	350.669	2.13683	1.09547	0.000188503	0.00213955	UP	NA	NA	NA	NA	NA	NA	NA	NA	NA
gene3357	17355997	CHLNCDRAFT_144156	104.843	224.362	2.13999	1.09761	0.00133595	0.0110945	UP	NA	NA	NA	NA	NA	NA	NA	NA	NA
gene3957	17355561	CHLNCDRAFT_145004	529.467	1134.94	2.14355	1.1	5.61122e-05	0.000752201	UP	NA	NA	NA	NA	NA	NA	NA	NA	NA
gene1564	17357931	CHLNCDRAFT_29840	2617.73	5626.45	2.14936	1.10391	0.00109131	0.00935336	UP	NA	NA	NA	NA	NA	NA	NA	NA	NA
gene3759	17355631	CHLNCDRAFT_144743	171.154	367.919	2.14964	1.10409	0.000161406	0.00185829	UP	NA	NA	NA	NA	NA	NA	NA	NA	NA
gene2793	17356999	CHLNCDRAFT_34794	106.569	230.648	2.16431	1.11391	0.0010171	0.00884339	UP	NA	NA	NA	NA	NA	NA	NA	NA	NA
gene44	17359265	CHLNCDRAFT_132922	146.307	316.876	2.16583	1.11492	0.000243755	0.00266324	UP	NA	NA	NA	NA	NA	NA	NA	NA	NA
gene7151	17352522	CHLNCDRAFT_36644	5558.22	12045.7	2.16719	1.11582	0.001548	0.012511	UP	NA	NA	NA	NA	NA	NA	NA	NA	NA
gene8598	17350968	CHLNCDRAFT_59183	572.699	1242.25	2.16911	1.1171	4.66297e-05	0.000643607	UP	NA	NA	NA	NA	NA	NA	NA	NA	NA
gene3359	17356028	CHLNCDRAFT_144158	73.6079	159.787	2.17079	1.11822	0.00408502	0.0280045	UP	NA	NA	NA	NA	NA	NA	NA	NA	NA
gene4032	17355567	CHLNCDRAFT_145104	845.623	1837.59	2.17306	1.11973	0.00010111	0.00125572	UP	NA	NA	NA	NA	NA	NA	NA	NA	NA
gene3471	17355966	CHLNCDRAFT_57507	477.882	1038.54	2.17322	1.11984	3.69885e-05	0.000523551	UP	NA	NA	NA	NA	NA	NA	NA	NA	NA
gene787	17358902	CHLNCDRAFT_56681	980.162	2134.78	2.17799	1.123	0.000145554	0.00170226	UP	NA	NA	NA	NA	NA	NA	NA	NA	NA
gene4506	17355169	CHLNCDRAFT_133823	848.818	1849.39	2.17879	1.12353	9.87611e-05	0.00122972	UP	NA	NA	NA	NA	NA	NA	NA	NA	NA
gene1635	17358052	CHLNCDRAFT_140744	88.1399	192.167	2.18026	1.1245	0.00183582	0.0144953	UP	NA	NA	NA	NA	NA	NA	NA	NA	NA
gene8199	17351340	CHLNCDRAFT_54750	188.644	411.351	2.18057	1.1247	7.56252e-05	0.000981907	UP	NA	NA	NA	NA	NA	NA	NA	NA	NA
gene7210	17352558	CHLNCDRAFT_26258	98.0726	214.016	2.18222	1.1258	0.00156386	0.012617	UP	NA	NA	NA	NA	NA	NA	NA	NA	NA
gene6160	17353326	CHLNCDRAFT_25174	70.4729	153.838	2.18294	1.12627	0.0037731	0.026221	UP	NA	NA	NA	NA	NA	NA	NA	NA	NA
gene7479	17352041	CHLNCDRAFT_138534	291.807	638.65	2.1886	1.13001	2.87613e-05	0.000418801	UP	NA	NA	NA	NA	NA	NA	NA	NA	NA
gene9057	17350593	CHLNCDRAFT_141372	350.976	770.81	2.19619	1.135	2.64414e-05	0.000391536	UP	NA	NA	NA	NA	NA	NA	NA	NA	NA
gene2836	17357041	CHLNCDRAFT_143317	1006.07	2212.5	2.19915	1.13695	0.000128288	0.00153007	UP	NA	NA	NA	NA	NA	NA	NA	NA	NA
gene7948	17351660	CHLNCDRAFT_139154	102.024	226.532	2.22037	1.1508	0.000634936	0.00609906	UP	NA	NA	NA	NA	NA	NA	NA	NA	NA
gene5343	17354305	CHLNCDRAFT_134928	207.862	462.677	2.22588	1.15438	3.87198e-05	0.000545649	UP	NA	NA	NA	NA	NA	NA	NA	NA	NA
gene1179	17358538	CHLNCDRAFT_138185	3584.67	8010.17	2.23456	1.15999	0.000807193	0.00746324	UP	NA	NA	NA	NA	NA	NA	NA	NA	NA
gene9554	17350069	CHLNCDRAFT_59474	91.05	203.524	2.2353	1.16047	0.00110255	0.00943292	UP	NA	NA	NA	NA	NA	NA	NA	NA	NA
gene5656	17353920	CHLNCDRAFT_14451	83.2436	186.363	2.23877	1.16271	0.00153295	0.0124302	UP	NA	NA	NA	NA	NA	NA	NA	NA	NA
gene3799	17355884	CHLNCDRAFT_57598	309.863	694.537	2.24143	1.16442	1.831e-05	0.000286094	UP	NA	NA	NA	NA	NA	NA	NA	NA	NA
gene3083	17356574	CHLNCDRAFT_15221	475.938	1074.09	2.2568	1.17428	1.81295e-05	0.000284195	UP	NA	NA	NA	NA	NA	NA	NA	NA	NA
gene1426	17358001	CHLNCDRAFT_140495	96.649	218.395	2.25967	1.17611	0.000614604	0.00592742	UP	NA	NA	NA	NA	NA	NA	NA	NA	NA
gene7707	17351959	CHLNCDRAFT_58857	205.344	464.043	2.25983	1.17621	2.7369e-05	0.000402178	UP	NA	NA	NA	NA	NA	NA	NA	NA	NA
gene1725	17358336	CHLNCDRAFT_140852	108.552	245.42	2.26085	1.17687	0.000399369	0.00407395	UP	NA	NA	NA	NA	NA	NA	NA	NA	NA
gene3573	17356047	CHLNCDRAFT_144428	204.599	462.969	2.26281	1.17811	2.28402e-05	0.000347294	UP	NA	NA	NA	NA	NA	NA	NA	NA	NA
gene6384	17353128	CHLNCDRAFT_53515	147.312	333.468	2.26369	1.17868	9.3043e-05	0.00116911	UP	NA	NA	NA	NA	NA	NA	NA	NA	NA
gene6451	17353115	CHLNCDRAFT_58444	1740.78	3945.63	2.26659	1.18052	0.000241505	0.00264446	UP	NA	NA	NA	NA	NA	NA	NA	NA	NA
gene7846	17351666	CHLNCDRAFT_36861	454.184	1029.74	2.26724	1.18093	1.38267e-05	0.000221803	UP	NA	NA	NA	NA	NA	NA	NA	NA	NA
gene9272	17350340	CHLNCDRAFT_141677	240.832	546.745	2.27023	1.18284	1.88557e-05	0.000293516	UP	NA	NA	NA	NA	NA	NA	NA	NA	NA
gene4202	17355350	CHLNCDRAFT_145336	1591.41	3618.9	2.27402	1.18524	0.000203731	0.00226958	UP	NA	NA	NA	NA	NA	NA	NA	NA	NA
gene6147	17353394	CHLNCDRAFT_58353	373.786	850.026	2.2741	1.18529	1.2852e-05	0.000208251	UP	NA	NA	NA	NA	NA	NA	NA	NA	NA
gene3022	17356680	CHLNCDRAFT_143645	565.025	1285.04	2.2743	1.18543	1.69679e-05	0.000267731	UP	NA	NA	NA	NA	NA	NA	NA	NA	NA
gene2810	17356783	CHLNCDRAFT_20970	126.765	288.689	2.27736	1.18736	0.000200076	0.00223953	UP	NA	NA	NA	NA	NA	NA	NA	NA	NA
gene843	17358695	CHLNCDRAFT_137793	653.164	1487.64	2.27758	1.1875	1.98264e-05	0.000306799	UP	NA	NA	NA	NA	NA	NA	NA	NA	NA
gene5564	17354129	CHLNCDRAFT_135224	62.2642	141.893	2.27888	1.18833	0.00324214	0.0232611	UP	NA	NA	NA	NA	NA	NA	NA	NA	NA
gene6258	17353489	CHLNCDRAFT_25376	109.931	250.537	2.27903	1.18842	0.000293952	0.00312284	UP	NA	NA	NA	NA	NA	NA	NA	NA	NA
gene1795	17358257	CHLNCDRAFT_50489	152.086	347.145	2.28256	1.19065	7.67818e-05	0.000991979	UP	NA	NA	NA	NA	NA	NA	NA	NA	NA
gene3195	17356384	CHLNCDRAFT_57435	160.659	368.31	2.2925	1.19692	4.70935e-05	0.000647535	UP	NA	NA	NA	NA	NA	NA	NA	NA	NA
gene267	17359112	CHLNCDRAFT_133199	173.962	400.625	2.30294	1.20348	3.5344e-05	0.000502491	UP	NA	NA	NA	NA	NA	NA	NA	NA	NA
gene6003	17353558	CHLNCDRAFT_59709	11885.4	27436.5	2.30842	1.20691	0.000590679	0.00572536	UP	NA	NA	NA	NA	NA	NA	NA	NA	NA
gene2339	17357233	CHLNCDRAFT_34566	551.277	1273.98	2.31096	1.20849	1.22338e-05	0.000199239	UP	NA	NA	NA	NA	NA	NA	NA	NA	NA
gene68	17359285	CHLNCDRAFT_132954	57.7918	133.557	2.311	1.20852	0.00409635	0.0280422	UP	NA	NA	NA	NA	NA	NA	NA	NA	NA
gene3179	17356378	CHLNCDRAFT_143861	150.252	348.041	2.31637	1.21187	5.35065e-05	0.0007223	UP	NA	NA	NA	NA	NA	NA	NA	NA	NA
gene319	17359447	CHLNCDRAFT_133265	1453.67	3376.43	2.32269	1.2158	0.000124422	0.00149136	UP	NA	NA	NA	NA	NA	NA	NA	NA	NA
gene374	17359099	CHLNCDRAFT_133341	116.937	271.93	2.32545	1.21751	0.000188734	0.00213966	UP	NA	NA	NA	NA	NA	NA	NA	NA	NA
gene1840	17357684	CHLNCDRAFT_141891	281.077	655.743	2.33297	1.22217	8.00977e-06	0.000135968	UP	NA	NA	NA	NA	NA	NA	NA	NA	NA
gene6944	17352608	CHLNCDRAFT_137099	917.847	2141.89	2.3336	1.22256	3.12646e-05	0.000451157	UP	NA	NA	NA	NA	NA	NA	NA	NA	NA
gene9620	17350001	CHLNCDRAFT_136271	169.625	396.011	2.33463	1.22319	2.76528e-05	0.000405729	UP	NA	NA	NA	NA	NA	NA	NA	NA	NA
gene2876	17356451	CHLNCDRAFT_51197	126.254	294.974	2.33635	1.22426	0.000114233	0.00139706	UP	NA	NA	NA	NA	NA	NA	NA	NA	NA
gene6012	17353852	CHLNCDRAFT_58309	1142.76	2673.12	2.33917	1.226	5.79504e-05	0.00077361	UP	NA	NA	NA	NA	NA	NA	NA	NA	NA
gene3393	17356120	CHLNCDRAFT_57482	227.184	531.616	2.34003	1.22652	8.08656e-06	0.000136789	UP	NA	NA	NA	NA	NA	NA	NA	NA	NA
gene70	17359332	CHLNCDRAFT_132957	220.173	519.122	2.35779	1.23744	7.64844e-06	0.000130064	UP	NA	NA	NA	NA	NA	NA	NA	NA	NA
gene6994	17352714	CHLNCDRAFT_137156	152.098	360.06	2.36729	1.24324	2.97804e-05	0.000431681	UP	NA	NA	NA	NA	NA	NA	NA	NA	NA
gene932	17358685	CHLNCDRAFT_56732	234.773	556.919	2.37216	1.2462	6.23458e-06	0.000109105	UP	NA	NA	NA	NA	NA	NA	NA	NA	NA
gene6416	17353061	CHLNCDRAFT_136359	87.0137	206.481	2.37297	1.24669	0.000404392	0.00411264	UP	NA	NA	NA	NA	NA	NA	NA	NA	NA
gene5583	17354009	CHLNCDRAFT_135252	233.485	554.575	2.37521	1.24806	5.48541e-06	9.68754e-05	UP	NA	NA	NA	NA	NA	NA	NA	NA	NA
gene7647	17351968	CHLNCDRAFT_138771	54.0428	128.744	2.38226	1.25233	0.00321918	0.0231401	UP	NA	NA	NA	NA	NA	NA	NA	NA	NA
gene3136	17356559	CHLNCDRAFT_143807	108.983	260.694	2.39206	1.25825	0.000115988	0.0014078	UP	NA	NA	NA	NA	NA	NA	NA	NA	NA
gene8618	17351044	CHLNCDRAFT_140053	88.4395	211.627	2.3929	1.25876	0.000357389	0.00370277	UP	NA	NA	NA	NA	NA	NA	NA	NA	NA
gene6409	17353049	CHLNCDRAFT_58434	209.185	501.508	2.39744	1.2615	6.45955e-06	0.000112429	UP	NA	NA	NA	NA	NA	NA	NA	NA	NA
gene7728	17351858	CHLNCDRAFT_138868	584.303	1405.53	2.40549	1.26633	5.27665e-06	9.37043e-05	UP	NA	NA	NA	NA	NA	NA	NA	NA	NA
gene7894	17351775	CHLNCDRAFT_139086	672.24	1620.98	2.41131	1.26982	7.38868e-06	0.000126092	UP	NA	NA	NA	NA	NA	NA	NA	NA	NA
gene4189	17355528	CHLNCDRAFT_145317	70.5785	170.533	2.41622	1.27275	0.000900949	0.00811951	UP	NA	NA	NA	NA	NA	NA	NA	NA	NA
gene3313	17356264	CHLNCDRAFT_144105	64.9978	157.091	2.41687	1.27314	0.00102656	0.00891756	UP	NA	NA	NA	NA	NA	NA	NA	NA	NA
gene5614	17354100	CHLNCDRAFT_31627	6904.44	16714.7	2.42087	1.27552	0.000339153	0.00353284	UP	NA	NA	NA	NA	NA	NA	NA	NA	NA
gene6126	17353381	CHLNCDRAFT_135970	116.275	281.62	2.42202	1.27621	6.93877e-05	0.000909886	UP	NA	NA	NA	NA	NA	NA	NA	NA	NA
gene702	17358821	CHLNCDRAFT_33744	438.312	1065.26	2.43037	1.28118	2.5224e-06	4.79805e-05	UP	NA	NA	NA	NA	NA	NA	NA	NA	NA
gene5057	17354640	CHLNCDRAFT_52665	85.0597	206.975	2.43328	1.28291	0.00036916	0.00380017	UP	NA	NA	NA	NA	NA	NA	NA	NA	NA
gene7940	17351674	CHLNCDRAFT_139143	160.085	389.557	2.43344	1.283	1.07624e-05	0.000177799	UP	NA	NA	NA	NA	NA	NA	NA	NA	NA
gene9206	17350377	CHLNCDRAFT_141587	133.009	324.596	2.4404	1.28712	3.34989e-05	0.000481234	UP	NA	NA	NA	NA	NA	NA	NA	NA	NA
gene7857	17351644	CHLNCDRAFT_59761	120.734	297.457	2.46373	1.30085	3.92317e-05	0.000550445	UP	NA	NA	NA	NA	NA	NA	NA	NA	NA
gene1956	17357609	CHLNCDRAFT_10454	83.5288	206.207	2.46869	1.30375	0.000288028	0.003073	UP	NA	NA	NA	NA	NA	NA	NA	NA	NA
gene8582	17351052	CHLNCDRAFT_140010	92.6896	229.026	2.47089	1.30503	0.000168464	0.00193534	UP	NA	NA	NA	NA	NA	NA	NA	NA	NA
gene6149	17353338	CHLNCDRAFT_53363	118.002	291.719	2.47216	1.30577	4.07357e-05	0.000569886	UP	NA	NA	NA	NA	NA	NA	NA	NA	NA
gene3713	17355628	CHLNCDRAFT_57573	336.908	836.253	2.48214	1.31158	1.26801e-06	2.65316e-05	UP	NA	NA	NA	NA	NA	NA	NA	NA	NA
gene2998	17356703	CHLNCDRAFT_143607	180.541	449.882	2.49186	1.31722	3.73435e-06	6.83935e-05	UP	NA	NA	NA	NA	NA	NA	NA	NA	NA
gene7296	17352182	CHLNCDRAFT_138284	72.1978	180.044	2.49376	1.31832	0.000518344	0.00509088	UP	NA	NA	NA	NA	NA	NA	NA	NA	NA
gene7220	17352446	CHLNCDRAFT_54096	49.4952	123.448	2.49415	1.31855	0.00172183	0.013719	UP	NA	NA	NA	NA	NA	NA	NA	NA	NA
gene9650	17349972	CHLNCDRAFT_137531	294.498	736.316	2.50024	1.32207	1.08201e-06	2.27886e-05	UP	NA	NA	NA	NA	NA	NA	NA	NA	NA
gene5325	17354227	CHLNCDRAFT_35818	6299.74	15839.6	2.51432	1.33017	0.000184629	0.00210054	UP	NA	NA	NA	NA	NA	NA	NA	NA	NA
gene4445	17355123	CHLNCDRAFT_35385	225.889	568.581	2.51708	1.33175	1.60384e-06	3.28446e-05	UP	NA	NA	NA	NA	NA	NA	NA	NA	NA
gene9627	17349995	CHLNCDRAFT_55744	77.3654	194.919	2.51946	1.33312	0.000257469	0.0027907	UP	NA	NA	NA	NA	NA	NA	NA	NA	NA
gene4832	17354653	CHLNCDRAFT_134246	91.8736	232.389	2.52945	1.33882	0.000110448	0.00135422	UP	NA	NA	NA	NA	NA	NA	NA	NA	NA
gene1951	17357459	CHLNCDRAFT_57043	443.835	1125.32	2.53544	1.34224	1.04554e-06	2.21658e-05	UP	NA	NA	NA	NA	NA	NA	NA	NA	NA
gene2847	17356883	CHLNCDRAFT_17375	52.6006	133.742	2.5426	1.34631	0.00138615	0.0113934	UP	NA	NA	NA	NA	NA	NA	NA	NA	NA
gene1224	17358666	CHLNCDRAFT_138237	190.438	485.799	2.55096	1.35104	1.63245e-06	3.30787e-05	UP	NA	NA	NA	NA	NA	NA	NA	NA	NA
gene187	17359283	CHLNCDRAFT_56485	433.894	1113.27	2.56577	1.35939	7.41574e-07	1.63333e-05	UP	NA	NA	NA	NA	NA	NA	NA	NA	NA
gene6837	17352841	CHLNCDRAFT_136967	2221.34	5700.68	2.56633	1.3597	5.86044e-05	0.000781055	UP	NA	NA	NA	NA	NA	NA	NA	NA	NA
gene8594	17351075	CHLNCDRAFT_140026	150.99	388.699	2.57434	1.3642	3.40819e-06	6.30843e-05	UP	NA	NA	NA	NA	NA	NA	NA	NA	NA
gene5715	17354036	CHLNCDRAFT_135423	136.685	351.98	2.57513	1.36464	7.00712e-06	0.000120281	UP	NA	NA	NA	NA	NA	NA	NA	NA	NA
gene7771	17351961	CHLNCDRAFT_138918	1048.76	2706.22	2.58042	1.3676	7.13036e-06	0.000122117	UP	NA	NA	NA	NA	NA	NA	NA	NA	NA
gene8364	17351312	CHLNCDRAFT_139713	2125.81	5487.61	2.58142	1.36817	5.1513e-05	0.000700818	UP	NA	NA	NA	NA	NA	NA	NA	NA	NA
gene5358	17354220	CHLNCDRAFT_134943	4200.54	10863.1	2.58611	1.37079	0.000107096	0.00131815	UP	NA	NA	NA	NA	NA	NA	NA	NA	NA
gene5752	17353836	CHLNCDRAFT_25138	300.598	781.181	2.59876	1.37782	4.41541e-07	1.01671e-05	UP	NA	NA	NA	NA	NA	NA	NA	NA	NA
gene1069	17358669	CHLNCDRAFT_50022	88.6998	231.348	2.60821	1.38306	5.3493e-05	0.0007223	UP	NA	NA	NA	NA	NA	NA	NA	NA	NA
gene6769	17352979	CHLNCDRAFT_136860	619.758	1618.82	2.61201	1.38516	9.94616e-07	2.12737e-05	UP	NA	NA	NA	NA	NA	NA	NA	NA	NA
gene5593	17354130	CHLNCDRAFT_135265	52.7958	138.335	2.62019	1.38967	0.000723013	0.00674976	UP	NA	NA	NA	NA	NA	NA	NA	NA	NA
gene1683	17358366	CHLNCDRAFT_50418	4472.03	11749.1	2.62725	1.39355	8.56608e-05	0.00108915	UP	NA	NA	NA	NA	NA	NA	NA	NA	NA
gene3254	17356487	CHLNCDRAFT_143961	112.224	294.935	2.62808	1.39401	1.49972e-05	0.000238591	UP	NA	NA	NA	NA	NA	NA	NA	NA	NA
gene5253	17354536	CHLNCDRAFT_134826	798.561	2100.46	2.63031	1.39523	2.08688e-06	4.06603e-05	UP	NA	NA	NA	NA	NA	NA	NA	NA	NA
gene279	17359516	CHLNCDRAFT_133216	34.1883	89.9955	2.63235	1.39635	0.00396022	0.0273241	UP	NA	NA	NA	NA	NA	NA	NA	NA	NA
gene5707	17354097	CHLNCDRAFT_135413	1183.76	3137.71	2.65064	1.40634	6.32421e-06	0.000110273	UP	NA	NA	NA	NA	NA	NA	NA	NA	NA
gene6626	17352962	CHLNCDRAFT_136673	432.183	1148.06	2.65642	1.40948	3.01087e-07	7.08549e-06	UP	NA	NA	NA	NA	NA	NA	NA	NA	NA
gene7587	17352002	CHLNCDRAFT_54346	131.329	349.532	2.6615	1.41224	3.91368e-06	7.13432e-05	UP	NA	NA	NA	NA	NA	NA	NA	NA	NA
gene4926	17354591	CHLNCDRAFT_134369	1018.39	2713.45	2.66445	1.41384	3.58188e-06	6.6172e-05	UP	NA	NA	NA	NA	NA	NA	NA	NA	NA
gene5597	17353962	CHLNCDRAFT_135271	1358.84	3631.11	2.67222	1.41804	8.13657e-06	0.000137394	UP	NA	NA	NA	NA	NA	NA	NA	NA	NA
gene8208	17351434	CHLNCDRAFT_139516	49.6148	132.978	2.68022	1.42235	0.000606032	0.00585648	UP	NA	NA	NA	NA	NA	NA	NA	NA	NA
gene6381	17353232	CHLNCDRAFT_53512	64.2782	172.47	2.68319	1.42395	0.000244487	0.00266499	UP	NA	NA	NA	NA	NA	NA	NA	NA	NA
gene2033	17357325	CHLNCDRAFT_57065	173.997	466.943	2.68363	1.42419	5.17654e-07	1.1751e-05	UP	NA	NA	NA	NA	NA	NA	NA	NA	NA
gene5565	17353975	CHLNCDRAFT_135225	146.159	392.494	2.6854	1.42514	1.41574e-06	2.94304e-05	UP	NA	NA	NA	NA	NA	NA	NA	NA	NA
gene134	17359362	CHLNCDRAFT_133036	281.989	757.389	2.68588	1.42539	1.51905e-07	3.8476e-06	UP	NA	NA	NA	NA	NA	NA	NA	NA	NA
gene2996	17356702	CHLNCDRAFT_143605	52.0741	139.918	2.68691	1.42595	0.000538319	0.00526023	UP	NA	NA	NA	NA	NA	NA	NA	NA	NA
gene8773	17350856	CHLNCDRAFT_140979	31.6812	85.3302	2.6934	1.42943	0.00314136	0.0227335	UP	NA	NA	NA	NA	NA	NA	NA	NA	NA
gene8894	17350647	CHLNCDRAFT_141188	61.3333	165.393	2.69663	1.43116	0.000267232	0.00288353	UP	NA	NA	NA	NA	NA	NA	NA	NA	NA
gene959	17358764	CHLNCDRAFT_49962	128.988	347.957	2.69759	1.43167	2.79212e-06	5.26944e-05	UP	NA	NA	NA	NA	NA	NA	NA	NA	NA
gene729	17358988	CHLNCDRAFT_49816	216.228	583.653	2.69924	1.43255	1.96045e-07	4.82592e-06	UP	NA	NA	NA	NA	NA	NA	NA	NA	NA
gene261	17359108	CHLNCDRAFT_133191	299.444	808.479	2.69994	1.43293	1.42701e-07	3.64322e-06	UP	NA	NA	NA	NA	NA	NA	NA	NA	NA
gene6004	17353595	CHLNCDRAFT_56227	18642.5	50339.7	2.70026	1.4331	3.00006e-05	0.000434219	UP	NA	NA	NA	NA	NA	NA	NA	NA	NA
gene1061	17358859	CHLNCDRAFT_138046	140.111	379.438	2.70813	1.4373	1.26484e-06	2.65231e-05	UP	NA	NA	NA	NA	NA	NA	NA	NA	NA
gene3941	17355720	CHLNCDRAFT_144985	79.7959	217.486	2.72553	1.44654	4.92424e-05	0.000673235	UP	NA	NA	NA	NA	NA	NA	NA	NA	NA
gene414	17359400	CHLNCDRAFT_133394	105.68	288.78	2.73258	1.45026	8.88061e-06	0.000148138	UP	NA	NA	NA	NA	NA	NA	NA	NA	NA
gene5650	17353952	CHLNCDRAFT_135338	748.56	2048.5	2.73659	1.45238	5.82639e-07	1.31333e-05	UP	NA	NA	NA	NA	NA	NA	NA	NA	NA
gene609	17359380	CHLNCDRAFT_133673	48.6252	133.415	2.74374	1.45614	0.000581446	0.00565866	UP	NA	NA	NA	NA	NA	NA	NA	NA	NA
gene5773	17353623	CHLNCDRAFT_58231	185.061	509.462	2.75295	1.46098	2.12066e-07	5.18054e-06	UP	NA	NA	NA	NA	NA	NA	NA	NA	NA
gene3333	17355963	CHLNCDRAFT_57471	287.272	794.756	2.76656	1.4681	6.51457e-08	1.8018e-06	UP	NA	NA	NA	NA	NA	NA	NA	NA	NA
gene133	17359361	CHLNCDRAFT_133035	73.8191	204.979	2.77678	1.47341	4.82527e-05	0.000661762	UP	NA	NA	NA	NA	NA	NA	NA	NA	NA
gene2471	17356895	CHLNCDRAFT_142855	455.484	1264.82	2.77686	1.47346	1.09842e-07	2.88862e-06	UP	NA	NA	NA	NA	NA	NA	NA	NA	NA
gene3466	17356348	CHLNCDRAFT_57505	1124.46	3123.47	2.77774	1.47391	2.19942e-06	4.25088e-05	UP	NA	NA	NA	NA	NA	NA	NA	NA	NA
gene8129	17351624	CHLNCDRAFT_32733	13036	36492.7	2.79938	1.48511	2.42712e-05	0.000363879	UP	NA	NA	NA	NA	NA	NA	NA	NA	NA
gene6398	17353149	CHLNCDRAFT_136334	611.88	1717.41	2.80678	1.48892	1.76584e-07	4.41461e-06	UP	NA	NA	NA	NA	NA	NA	NA	NA	NA
gene3181	17356753	CHLNCDRAFT_143863	291.908	820.439	2.8106	1.49088	4.33196e-08	1.24836e-06	UP	NA	NA	NA	NA	NA	NA	NA	NA	NA
gene405	17359086	CHLNCDRAFT_133381	174.348	490.654	2.81422	1.49273	9.80238e-08	2.62078e-06	UP	NA	NA	NA	NA	NA	NA	NA	NA	NA
gene4028	17355651	CHLNCDRAFT_57670	299.247	842.438	2.8152	1.49323	3.77181e-08	1.10682e-06	UP	NA	NA	NA	NA	NA	NA	NA	NA	NA
gene6132	17353279	CHLNCDRAFT_135976	412.234	1164.32	2.82441	1.49795	5.10296e-08	1.44035e-06	UP	NA	NA	NA	NA	NA	NA	NA	NA	NA
gene4742	17355064	CHLNCDRAFT_57897	49.9748	141.199	2.82541	1.49846	0.000327047	0.0034289	UP	NA	NA	NA	NA	NA	NA	NA	NA	NA
gene7804	17351820	CHLNCDRAFT_138957	72.1721	204.057	2.82736	1.49946	4.25536e-05	0.000591876	UP	NA	NA	NA	NA	NA	NA	NA	NA	NA
gene4248	17355391	CHLNCDRAFT_145396	660.203	1870.17	2.83272	1.50219	1.93529e-07	4.79705e-06	UP	NA	NA	NA	NA	NA	NA	NA	NA	NA
gene9522	17350100	CHLNCDRAFT_55653	42.2778	120.342	2.84646	1.50917	0.000504701	0.00497211	UP	NA	NA	NA	NA	NA	NA	NA	NA	NA
gene1682	17357925	CHLNCDRAFT_29899	4107.95	11712.5	2.85117	1.51155	2.08271e-05	0.000320394	UP	NA	NA	NA	NA	NA	NA	NA	NA	NA
gene6651	17352843	CHLNCDRAFT_136700	44.2567	126.798	2.86507	1.51857	0.000447968	0.00450072	UP	NA	NA	NA	NA	NA	NA	NA	NA	NA
gene3162	17356401	CHLNCDRAFT_143840	260.318	745.834	2.86509	1.51858	2.46043e-08	7.4237e-07	UP	NA	NA	NA	NA	NA	NA	NA	NA	NA
gene4387	17355501	CHLNCDRAFT_145578	63.1559	182.036	2.88233	1.52724	5.62183e-05	0.000752575	UP	NA	NA	NA	NA	NA	NA	NA	NA	NA
gene2720	17356924	CHLNCDRAFT_143171	572.415	1651.16	2.88455	1.52834	7.80198e-08	2.12731e-06	UP	NA	NA	NA	NA	NA	NA	NA	NA	NA
gene9100	17350539	CHLNCDRAFT_141437	455.603	1332.98	2.92574	1.5488	2.363e-08	7.15215e-07	UP	NA	NA	NA	NA	NA	NA	NA	NA	NA
gene3290	17356325	CHLNCDRAFT_57462	542.806	1592.84	2.93446	1.55309	4.06865e-08	1.17954e-06	UP	NA	NA	NA	NA	NA	NA	NA	NA	NA
gene5049	17354719	CHLNCDRAFT_58007	222.05	652.708	2.93947	1.55556	1.45922e-08	4.62005e-07	UP	NA	NA	NA	NA	NA	NA	NA	NA	NA
gene5613	17353995	CHLNCDRAFT_24450	4132.6	12172.8	2.94555	1.55854	1.17242e-05	0.000191588	UP	NA	NA	NA	NA	NA	NA	NA	NA	NA
gene7293	17352189	CHLNCDRAFT_138281	126.058	372.702	2.95659	1.56394	2.41406e-07	5.83801e-06	UP	NA	NA	NA	NA	NA	NA	NA	NA	NA
gene1771	17358145	CHLNCDRAFT_50475	593.53	1762.53	2.96957	1.57025	4.23093e-08	1.2229e-06	UP	NA	NA	NA	NA	NA	NA	NA	NA	NA
gene9714	17349908	CHLNCDRAFT_59511	23.1421	68.9382	2.97891	1.57478	0.00304777	0.0222402	UP	NA	NA	NA	NA	NA	NA	NA	NA	NA
gene1180	17358539	CHLNCDRAFT_138186	170.421	510.884	2.99777	1.58389	2.18817e-08	6.66491e-07	UP	NA	NA	NA	NA	NA	NA	NA	NA	NA
gene7710	17351798	CHLNCDRAFT_54430	19.0745	57.5053	3.01477	1.59205	0.00431714	0.0292006	UP	NA	NA	NA	NA	NA	NA	NA	NA	NA
gene3334	17356014	CHLNCDRAFT_144129	64.3326	194.997	3.03107	1.59983	2.24824e-05	0.000342937	UP	NA	NA	NA	NA	NA	NA	NA	NA	NA
gene4372	17355493	CHLNCDRAFT_145552	436.293	1322.65	3.03156	1.60006	8.76278e-09	2.85904e-07	UP	NA	NA	NA	NA	NA	NA	NA	NA	NA
gene9097	17350492	CHLNCDRAFT_141434	172.348	523.378	3.03675	1.60253	1.46549e-08	4.62471e-07	UP	NA	NA	NA	NA	NA	NA	NA	NA	NA
gene6750	17352890	CHLNCDRAFT_136833	232.887	707.997	3.04009	1.60412	5.47929e-09	1.87479e-07	UP	NA	NA	NA	NA	NA	NA	NA	NA	NA
gene583	17359160	CHLNCDRAFT_133632	321.731	981.842	3.05175	1.60964	4.25542e-09	1.484e-07	UP	NA	NA	NA	NA	NA	NA	NA	NA	NA
gene4000	17355862	CHLNCDRAFT_22309	477.258	1456.54	3.05189	1.6097	9.78961e-09	3.17256e-07	UP	NA	NA	NA	NA	NA	NA	NA	NA	NA
gene7325	17352316	CHLNCDRAFT_26430	526.746	1607.98	3.05266	1.61007	1.4362e-08	4.56218e-07	UP	NA	NA	NA	NA	NA	NA	NA	NA	NA
gene8757	17350951	CHLNCDRAFT_140248	155.672	475.583	3.05504	1.61119	1.8254e-08	5.61325e-07	UP	NA	NA	NA	NA	NA	NA	NA	NA	NA
gene1838	17357679	CHLNCDRAFT_8109	32.3273	98.7865	3.05582	1.61156	0.000649849	0.006199	UP	NA	NA	NA	NA	NA	NA	NA	NA	NA
gene6649	17352903	CHLNCDRAFT_136698	330.113	1010.01	3.05958	1.61333	4.11484e-09	1.45053e-07	UP	NA	NA	NA	NA	NA	NA	NA	NA	NA
gene1925	17357352	CHLNCDRAFT_142002	60.6885	185.776	3.06115	1.61407	2.68576e-05	0.000396479	UP	NA	NA	NA	NA	NA	NA	NA	NA	NA
gene6386	17353187	CHLNCDRAFT_136323	27.5249	84.4037	3.06645	1.61657	0.00123367	0.0103343	UP	NA	NA	NA	NA	NA	NA	NA	NA	NA
gene7610	17352128	CHLNCDRAFT_32470	2084.89	6437.16	3.08753	1.62645	2.06051e-06	4.02281e-05	UP	NA	NA	NA	NA	NA	NA	NA	NA	NA
gene5314	17354206	CHLNCDRAFT_52813	311.866	963.703	3.09012	1.62766	3.1422e-09	1.1285e-07	UP	NA	NA	NA	NA	NA	NA	NA	NA	NA
gene3999	17355850	CHLNCDRAFT_22188	610.188	1888.07	3.09425	1.62959	1.6661e-08	5.20656e-07	UP	NA	NA	NA	NA	NA	NA	NA	NA	NA
gene5431	17354223	CHLNCDRAFT_135022	1136.81	3542.27	3.11596	1.63968	2.31945e-07	5.63756e-06	UP	NA	NA	NA	NA	NA	NA	NA	NA	NA
gene2480	17357185	CHLNCDRAFT_57218	399.724	1248.63	3.12374	1.64327	2.91724e-09	1.05163e-07	UP	NA	NA	NA	NA	NA	NA	NA	NA	NA
gene6676	17352971	CHLNCDRAFT_136728	178.666	560.832	3.139	1.65031	3.95562e-09	1.4049e-07	UP	NA	NA	NA	NA	NA	NA	NA	NA	NA
gene3634	17356018	CHLNCDRAFT_144514	36.228	113.947	3.14526	1.65318	0.000296836	0.00314653	UP	NA	NA	NA	NA	NA	NA	NA	NA	NA
gene3740	17355804	CHLNCDRAFT_51737	30.5099	96.0777	3.14907	1.65493	0.000588928	0.00571415	UP	NA	NA	NA	NA	NA	NA	NA	NA	NA
gene5640	17354142	CHLNCDRAFT_135325	50.4092	159.385	3.16181	1.66075	4.67409e-05	0.000643607	UP	NA	NA	NA	NA	NA	NA	NA	NA	NA
gene302	17359439	CHLNCDRAFT_133245	53.0515	168.231	3.17109	1.66498	2.91592e-05	0.000423954	UP	NA	NA	NA	NA	NA	NA	NA	NA	NA
gene1760	17357934	CHLNCDRAFT_140892	233.349	741.428	3.17734	1.66782	1.1404e-09	4.5714e-08	UP	NA	NA	NA	NA	NA	NA	NA	NA	NA
gene6399	17353136	CHLNCDRAFT_136335	62.9247	201.068	3.19537	1.67598	9.97253e-06	0.000165778	UP	NA	NA	NA	NA	NA	NA	NA	NA	NA
gene4628	17355048	CHLNCDRAFT_133975	56.4425	181.277	3.21172	1.68334	1.39441e-05	0.000223314	UP	NA	NA	NA	NA	NA	NA	NA	NA	NA
gene7947	17351656	CHLNCDRAFT_58940	91.053	292.5	3.21241	1.68366	3.03936e-07	7.13509e-06	UP	NA	NA	NA	NA	NA	NA	NA	NA	NA
gene7403	17352185	CHLNCDRAFT_26491	96.9195	313.284	3.23241	1.69261	1.72722e-07	4.35197e-06	UP	NA	NA	NA	NA	NA	NA	NA	NA	NA
gene6896	17352613	CHLNCDRAFT_53893	44.7232	144.874	3.23934	1.6957	5.15511e-05	0.000700818	UP	NA	NA	NA	NA	NA	NA	NA	NA	NA
gene9499	17350127	CHLNCDRAFT_55633	65.0747	213.022	3.2735	1.71083	2.99151e-06	5.60181e-05	UP	NA	NA	NA	NA	NA	NA	NA	NA	NA
gene5710	17354082	CHLNCDRAFT_58204	349.718	1147.22	3.28042	1.71388	6.39547e-10	2.64191e-08	UP	NA	NA	NA	NA	NA	NA	NA	NA	NA
gene2016	17357322	CHLNCDRAFT_50630	127.124	417.203	3.28186	1.71451	8.46204e-09	2.78929e-07	UP	NA	NA	NA	NA	NA	NA	NA	NA	NA
gene7138	17352525	CHLNCDRAFT_137360	47.8726	157.197	3.28366	1.7153	3.55747e-05	0.000505025	UP	NA	NA	NA	NA	NA	NA	NA	NA	NA
gene1943	17357413	CHLNCDRAFT_142023	95.9429	315.379	3.28716	1.71684	1.01533e-07	2.69959e-06	UP	NA	NA	NA	NA	NA	NA	NA	NA	NA
gene5727	17354122	CHLNCDRAFT_53084	86.0055	284.399	3.30675	1.72542	2.67534e-07	6.38962e-06	UP	NA	NA	NA	NA	NA	NA	NA	NA	NA
gene7295	17352190	CHLNCDRAFT_138283	90.45	300.271	3.31975	1.73107	1.34448e-07	3.46006e-06	UP	NA	NA	NA	NA	NA	NA	NA	NA	NA
gene2038	17357306	CHLNCDRAFT_142133	265.616	893.012	3.36204	1.74934	1.82867e-10	8.34168e-09	UP	NA	NA	NA	NA	NA	NA	NA	NA	NA
gene8271	17351379	CHLNCDRAFT_59076	11.8111	39.7222	3.36313	1.74981	0.00530715	0.0343487	UP	NA	NA	NA	NA	NA	NA	NA	NA	NA
gene9217	17350401	CHLNCDRAFT_141602	24.597	83.8221	3.40782	1.76885	0.000483787	0.00479824	UP	NA	NA	NA	NA	NA	NA	NA	NA	NA
gene8664	17350883	CHLNCDRAFT_55059	108.566	372.353	3.42975	1.7781	7.60054e-09	2.54756e-07	UP	NA	NA	NA	NA	NA	NA	NA	NA	NA
gene5360	17354238	CHLNCDRAFT_134945	82.3161	285.253	3.46534	1.793	9.93993e-08	2.65019e-06	UP	NA	NA	NA	NA	NA	NA	NA	NA	NA
gene4368	17355339	CHLNCDRAFT_56149	198.493	687.893	3.46558	1.7931	8.04148e-11	3.85071e-09	UP	NA	NA	NA	NA	NA	NA	NA	NA	NA
gene4540	17355160	CHLNCDRAFT_57838	82.8418	287.313	3.46822	1.79419	6.61135e-08	1.81294e-06	UP	NA	NA	NA	NA	NA	NA	NA	NA	NA
gene2508	17357197	CHLNCDRAFT_50966	18.1744	63.2264	3.47887	1.79862	0.000983313	0.00868292	UP	NA	NA	NA	NA	NA	NA	NA	NA	NA
gene6103	17353484	CHLNCDRAFT_135934	116.562	408.013	3.50039	1.80752	1.92463e-09	7.26454e-08	UP	NA	NA	NA	NA	NA	NA	NA	NA	NA
gene5357	17354429	CHLNCDRAFT_35848	4785.31	16804.8	3.51176	1.81219	4.94529e-07	1.13158e-05	UP	NA	NA	NA	NA	NA	NA	NA	NA	NA
gene8615	17351018	CHLNCDRAFT_59190	746.127	2622.08	3.51425	1.81322	2.3024e-09	8.55623e-08	UP	NA	NA	NA	NA	NA	NA	NA	NA	NA
gene6816	17352610	CHLNCDRAFT_136937	82.9331	293.661	3.54095	1.82413	3.97597e-08	1.15616e-06	UP	NA	NA	NA	NA	NA	NA	NA	NA	NA
gene5698	17354047	CHLNCDRAFT_35970	178.767	635.042	3.55234	1.82877	7.29163e-11	3.55121e-09	UP	NA	NA	NA	NA	NA	NA	NA	NA	NA
gene5991	17353737	CHLNCDRAFT_135780	24.4013	86.8478	3.55915	1.83153	0.000291275	0.00310125	UP	NA	NA	NA	NA	NA	NA	NA	NA	NA
gene8506	17351121	CHLNCDRAFT_139905	140.886	501.449	3.55926	1.83158	2.32768e-10	1.04691e-08	UP	NA	NA	NA	NA	NA	NA	NA	NA	NA
gene6610	17352883	CHLNCDRAFT_136647	116.847	423.33	3.62293	1.85716	5.38794e-10	2.2353e-08	UP	NA	NA	NA	NA	NA	NA	NA	NA	NA
gene6219	17353453	CHLNCDRAFT_136097	413.35	1497.73	3.62338	1.85734	4.31383e-11	2.14024e-09	UP	NA	NA	NA	NA	NA	NA	NA	NA	NA
gene9027	17350623	CHLNCDRAFT_141336	168.009	608.929	3.62438	1.85773	2.77583e-11	1.42873e-09	UP	NA	NA	NA	NA	NA	NA	NA	NA	NA
gene4972	17354805	CHLNCDRAFT_134441	75.1963	273.625	3.63881	1.86347	5.8172e-08	1.62413e-06	UP	NA	NA	NA	NA	NA	NA	NA	NA	NA
gene7272	17352215	CHLNCDRAFT_138258	57.5704	210.353	3.65383	1.86941	6.017e-07	1.35312e-05	UP	NA	NA	NA	NA	NA	NA	NA	NA	NA
gene8829	17350795	CHLNCDRAFT_141087	71.632	263.942	3.68469	1.88154	5.82154e-08	1.62413e-06	UP	NA	NA	NA	NA	NA	NA	NA	NA	NA
gene6564	17353192	CHLNCDRAFT_58496	80.6191	297.525	3.69051	1.88382	1.69618e-08	5.26636e-07	UP	NA	NA	NA	NA	NA	NA	NA	NA	NA
gene9376	17350247	CHLNCDRAFT_59419	208.303	769.016	3.69182	1.88433	1.12423e-11	6.07904e-10	UP	NA	NA	NA	NA	NA	NA	NA	NA	NA
gene6204	17353469	CHLNCDRAFT_136076	78.6681	293.72	3.73366	1.90059	1.50321e-08	4.72825e-07	UP	NA	NA	NA	NA	NA	NA	NA	NA	NA
gene6058	17353754	CHLNCDRAFT_135865	22.6299	85.8415	3.79328	1.92345	0.000175595	0.00200963	UP	NA	NA	NA	NA	NA	NA	NA	NA	NA
gene8942	17350670	CHLNCDRAFT_141241	273.495	1038.23	3.79614	1.92453	3.47855e-12	2.04153e-10	UP	NA	NA	NA	NA	NA	NA	NA	NA	NA
gene2052	17357369	CHLNCDRAFT_142148	78.3698	297.682	3.79843	1.9254	8.54243e-09	2.80617e-07	UP	NA	NA	NA	NA	NA	NA	NA	NA	NA
gene3673	17356231	CHLNCDRAFT_144568	30.7203	118.006	3.8413	1.9416	2.33829e-05	0.000353313	UP	NA	NA	NA	NA	NA	NA	NA	NA	NA
gene3172	17356381	CHLNCDRAFT_9043	22.1816	85.9681	3.87565	1.95444	0.000115066	0.00140141	UP	NA	NA	NA	NA	NA	NA	NA	NA	NA
gene7761	17351847	CHLNCDRAFT_58871	93.8098	365.527	3.89647	1.96217	3.85351e-10	1.63392e-08	UP	NA	NA	NA	NA	NA	NA	NA	NA	NA
gene6686	17352982	CHLNCDRAFT_136740	2636.23	10404.7	3.94681	1.98069	3.05428e-08	9.12964e-07	UP	NA	NA	NA	NA	NA	NA	NA	NA	NA
gene5655	17353901	CHLNCDRAFT_135347	22.8708	90.3534	3.9506	1.98207	0.000106423	0.00131155	UP	NA	NA	NA	NA	NA	NA	NA	NA	NA
gene6495	17353095	CHLNCDRAFT_58466	130.672	519.543	3.97593	1.99129	4.9426e-12	2.8317e-10	UP	NA	NA	NA	NA	NA	NA	NA	NA	NA
gene1136	17358817	CHLNCDRAFT_56787	40.4726	161.384	3.9875	1.99548	1.94136e-06	3.82901e-05	UP	NA	NA	NA	NA	NA	NA	NA	NA	NA
gene3218	17356433	CHLNCDRAFT_143912	83.1709	332.96	4.00333	2.0012	7.47645e-10	3.04919e-08	UP	NA	NA	NA	NA	NA	NA	NA	NA	NA
gene4568	17355114	CHLNCDRAFT_133896	27.0123	110.167	4.0784	2.028	2.08381e-05	0.000320394	UP	NA	NA	NA	NA	NA	NA	NA	NA	NA
gene9444	17350186	CHLNCDRAFT_142544	114.806	470.194	4.09557	2.03406	4.88952e-12	2.81806e-10	UP	NA	NA	NA	NA	NA	NA	NA	NA	NA
gene1202	17358396	CHLNCDRAFT_56806	25.1531	103.058	4.09723	2.03465	2.5312e-05	0.000377041	UP	NA	NA	NA	NA	NA	NA	NA	NA	NA
gene720	17358437	CHLNCDRAFT_137642	131.528	542.341	4.12339	2.04383	1.12485e-12	7.31533e-11	UP	NA	NA	NA	NA	NA	NA	NA	NA	NA
gene3147	17356627	CHLNCDRAFT_143823	44.7697	184.7	4.12555	2.04459	2.55815e-07	6.12821e-06	UP	NA	NA	NA	NA	NA	NA	NA	NA	NA
gene6498	17353065	CHLNCDRAFT_136479	133.22	550.864	4.13501	2.04789	1.25098e-12	8.02713e-11	UP	NA	NA	NA	NA	NA	NA	NA	NA	NA
gene643	17358726	CHLNCDRAFT_137547	68.6153	283.864	4.13704	2.0486	2.19204e-09	8.24157e-08	UP	NA	NA	NA	NA	NA	NA	NA	NA	NA
gene4995	17354784	CHLNCDRAFT_52604	21.5799	89.4286	4.14408	2.05105	4.67107e-05	0.000643607	UP	NA	NA	NA	NA	NA	NA	NA	NA	NA
gene3783	17355610	CHLNCDRAFT_144776	24.3574	101.471	4.16591	2.05863	2.5345e-05	0.000377041	UP	NA	NA	NA	NA	NA	NA	NA	NA	NA
gene1984	17357637	CHLNCDRAFT_20260	9.54485	40.0633	4.19737	2.06948	0.00153735	0.0124554	UP	NA	NA	NA	NA	NA	NA	NA	NA	NA
gene9010	17350553	CHLNCDRAFT_15322	80.1416	336.719	4.20155	2.07092	1.74263e-10	7.98706e-09	UP	NA	NA	NA	NA	NA	NA	NA	NA	NA
gene447	17359464	CHLNCDRAFT_56560	171.162	720.107	4.20717	2.07285	1.18247e-13	8.688e-12	UP	NA	NA	NA	NA	NA	NA	NA	NA	NA
gene3458	17356336	CHLNCDRAFT_144274	27.5984	116.573	4.2239	2.07858	1.16493e-05	0.000190688	UP	NA	NA	NA	NA	NA	NA	NA	NA	NA
gene6957	17352834	CHLNCDRAFT_137114	8.43264	35.7002	4.23357	2.08188	0.00205774	0.0160111	UP	NA	NA	NA	NA	NA	NA	NA	NA	NA
gene1921	17357340	CHLNCDRAFT_141998	42.6057	181.358	4.25665	2.08972	2.74428e-07	6.53804e-06	UP	NA	NA	NA	NA	NA	NA	NA	NA	NA
gene2454	17356806	CHLNCDRAFT_142837	234.623	999.122	4.25841	2.09031	5.82243e-14	4.51308e-12	UP	NA	NA	NA	NA	NA	NA	NA	NA	NA
gene4404	17355268	CHLNCDRAFT_52198	24.2969	104.37	4.29562	2.10287	1.85043e-05	0.000288661	UP	NA	NA	NA	NA	NA	NA	NA	NA	NA
gene846	17358498	CHLNCDRAFT_137796	77.9616	337.047	4.32324	2.11211	1.20192e-10	5.67082e-09	UP	NA	NA	NA	NA	NA	NA	NA	NA	NA
gene546	17359541	CHLNCDRAFT_59547	59.7432	258.578	4.32817	2.11376	3.67011e-09	1.30833e-07	UP	NA	NA	NA	NA	NA	NA	NA	NA	NA
gene7690	17351924	CHLNCDRAFT_138824	34.1579	149.79	4.38523	2.13265	7.50425e-07	1.64905e-05	UP	NA	NA	NA	NA	NA	NA	NA	NA	NA
gene4166	17355356	CHLNCDRAFT_145281	15.3382	67.3348	4.39001	2.13422	0.000129618	0.00154022	UP	NA	NA	NA	NA	NA	NA	NA	NA	NA
gene1764	17358123	CHLNCDRAFT_140897	30.2542	133.93	4.42682	2.14627	2.10071e-06	4.08471e-05	UP	NA	NA	NA	NA	NA	NA	NA	NA	NA
gene308	17359605	CHLNCDRAFT_133253	4.21718	18.7131	4.43734	2.1497	0.00722901	0.043733	UP	NA	NA	NA	NA	NA	NA	NA	NA	NA
gene7994	17351613	CHLNCDRAFT_58964	5.59854	24.9038	4.44827	2.15324	0.00313697	0.0227188	UP	NA	NA	NA	NA	NA	NA	NA	NA	NA
gene5249	17354511	CHLNCDRAFT_58072	37.4746	169.024	4.51036	2.17324	1.93923e-07	4.79705e-06	UP	NA	NA	NA	NA	NA	NA	NA	NA	NA
gene3327	17356286	CHLNCDRAFT_144120	141.762	639.447	4.5107	2.17335	1.73743e-14	1.45415e-12	UP	NA	NA	NA	NA	NA	NA	NA	NA	NA
gene6605	17352936	CHLNCDRAFT_136640	12.3076	55.7613	4.53064	2.17972	0.000199011	0.0022351	UP	NA	NA	NA	NA	NA	NA	NA	NA	NA
gene1985	17357638	CHLNCDRAFT_142071	527.218	2411.31	4.57366	2.19335	3.9098e-13	2.72694e-11	UP	NA	NA	NA	NA	NA	NA	NA	NA	NA
gene1068	17358924	CHLNCDRAFT_138057	55.1216	252.528	4.58128	2.19575	1.41473e-09	5.55788e-08	UP	NA	NA	NA	NA	NA	NA	NA	NA	NA
gene6095	17353372	CHLNCDRAFT_135925	102.535	471.374	4.5972	2.20076	2.25547e-13	1.60807e-11	UP	NA	NA	NA	NA	NA	NA	NA	NA	NA
gene9094	17350509	CHLNCDRAFT_55359	110.289	512.951	4.65095	2.21753	5.83295e-14	4.51308e-12	UP	NA	NA	NA	NA	NA	NA	NA	NA	NA
gene3509	17356224	CHLNCDRAFT_144349	266.471	1254.43	4.70757	2.23498	2.01018e-15	1.89686e-13	UP	NA	NA	NA	NA	NA	NA	NA	NA	NA
gene5714	17354035	CHLNCDRAFT_58206	70.9276	333.907	4.70771	2.23503	1.26129e-11	6.74438e-10	UP	NA	NA	NA	NA	NA	NA	NA	NA	NA
gene6849	17352793	CHLNCDRAFT_136979	54.2224	257.536	4.74963	2.24781	3.69357e-10	1.58003e-08	UP	NA	NA	NA	NA	NA	NA	NA	NA	NA
gene5199	17354483	CHLNCDRAFT_134766	15.7582	75.2348	4.77432	2.2553	3.49324e-05	0.000497373	UP	NA	NA	NA	NA	NA	NA	NA	NA	NA
gene5973	17353630	CHLNCDRAFT_135755	80.8599	388.886	4.80937	2.26585	7.85698e-13	5.28835e-11	UP	NA	NA	NA	NA	NA	NA	NA	NA	NA
gene2869	17356391	CHLNCDRAFT_143444	18.4132	89.3482	4.85241	2.2787	1.08425e-05	0.000178391	UP	NA	NA	NA	NA	NA	NA	NA	NA	NA
gene8162	17351396	CHLNCDRAFT_54730	23.5017	115.059	4.89579	2.29154	1.84295e-06	3.65739e-05	UP	NA	NA	NA	NA	NA	NA	NA	NA	NA
gene3379	17356044	CHLNCDRAFT_144182	10.1762	49.8927	4.9029	2.29364	0.000157869	0.00182631	UP	NA	NA	NA	NA	NA	NA	NA	NA	NA
gene4864	17354721	CHLNCDRAFT_134284	30.1207	148.155	4.9187	2.29828	1.867e-07	4.64338e-06	UP	NA	NA	NA	NA	NA	NA	NA	NA	NA
gene6236	17353464	CHLNCDRAFT_136118	51.2066	252.016	4.92155	2.29911	3.65119e-10	1.56887e-08	UP	NA	NA	NA	NA	NA	NA	NA	NA	NA
gene4870	17354728	CHLNCDRAFT_134293	38.5238	190.327	4.94051	2.30466	1.05001e-08	3.38006e-07	UP	NA	NA	NA	NA	NA	NA	NA	NA	NA
gene4491	17355117	CHLNCDRAFT_133804	23.4256	115.801	4.94336	2.30549	1.79778e-06	3.59743e-05	UP	NA	NA	NA	NA	NA	NA	NA	NA	NA
gene7129	17352567	CHLNCDRAFT_54039	21.5355	107.295	4.98227	2.3168	2.22832e-06	4.28952e-05	UP	NA	NA	NA	NA	NA	NA	NA	NA	NA
gene3456	17356335	CHLNCDRAFT_144272	28.9033	144.096	4.98545	2.31772	2.43626e-07	5.87695e-06	UP	NA	NA	NA	NA	NA	NA	NA	NA	NA
gene5537	17353931	CHLNCDRAFT_52952	81.5047	411.459	5.04828	2.33579	1.03464e-13	7.6603e-12	UP	NA	NA	NA	NA	NA	NA	NA	NA	NA
gene8554	17351026	CHLNCDRAFT_54976	5.07244	25.8077	5.08782	2.34705	0.00185536	0.0146162	UP	NA	NA	NA	NA	NA	NA	NA	NA	NA
gene4101	17355308	CHLNCDRAFT_51980	47.9047	244.399	5.10178	2.351	3.22311e-10	1.40373e-08	UP	NA	NA	NA	NA	NA	NA	NA	NA	NA
gene6663	17353044	CHLNCDRAFT_136712	22.9312	117.749	5.13487	2.36033	1.04148e-06	2.21286e-05	UP	NA	NA	NA	NA	NA	NA	NA	NA	NA
gene9072	17350567	CHLNCDRAFT_141392	7.233	37.5192	5.18723	2.37496	0.000450703	0.00451877	UP	NA	NA	NA	NA	NA	NA	NA	NA	NA
gene1483	17358118	CHLNCDRAFT_140556	38.8982	203.546	5.23279	2.38758	2.29043e-09	8.55623e-08	UP	NA	NA	NA	NA	NA	NA	NA	NA	NA
gene5845	17353636	CHLNCDRAFT_58255	59.3414	312.724	5.26991	2.39778	2.00221e-12	1.25956e-10	UP	NA	NA	NA	NA	NA	NA	NA	NA	NA
gene4876	17354725	CHLNCDRAFT_59680	484.855	2569.39	5.29929	2.4058	3.78184e-15	3.50002e-13	UP	NA	NA	NA	NA	NA	NA	NA	NA	NA
gene387	17359077	CHLNCDRAFT_133360	131.885	710.679	5.38863	2.42992	1.651e-17	1.82654e-15	UP	NA	NA	NA	NA	NA	NA	NA	NA	NA
gene5993	17353747	CHLNCDRAFT_11567	9.00311	48.9058	5.43211	2.44151	0.000125719	0.00150316	UP	NA	NA	NA	NA	NA	NA	NA	NA	NA
gene2137	17357397	CHLNCDRAFT_142251	7.23428	39.3926	5.44527	2.445	0.000245135	0.00266903	UP	NA	NA	NA	NA	NA	NA	NA	NA	NA
gene6881	17352762	CHLNCDRAFT_53882	53.4719	292.042	5.46159	2.44932	2.54667e-12	1.55137e-10	UP	NA	NA	NA	NA	NA	NA	NA	NA	NA
gene8150	17351630	CHLNCDRAFT_139429	57.7614	315.492	5.46199	2.44943	1.14625e-12	7.40447e-11	UP	NA	NA	NA	NA	NA	NA	NA	NA	NA
gene8285	17351369	CHLNCDRAFT_139612	35.1458	192.612	5.48038	2.45428	2.35661e-09	8.68913e-08	UP	NA	NA	NA	NA	NA	NA	NA	NA	NA
gene8368	17351287	CHLNCDRAFT_59790	19722.2	108474	5.50007	2.45945	2.54471e-13	1.80095e-11	UP	NA	NA	NA	NA	NA	NA	NA	NA	NA
gene3670	17355938	CHLNCDRAFT_17675	12.9672	71.4526	5.51026	2.46212	1.48053e-05	0.00023632	UP	NA	NA	NA	NA	NA	NA	NA	NA	NA
gene8522	17351105	CHLNCDRAFT_139922	21.4163	118.026	5.51103	2.46232	3.22731e-07	7.53952e-06	UP	NA	NA	NA	NA	NA	NA	NA	NA	NA
gene8151	17351599	CHLNCDRAFT_139430	7.68388	42.5784	5.54126	2.47021	0.000153333	0.00178025	UP	NA	NA	NA	NA	NA	NA	NA	NA	NA
gene4142	17355231	CHLNCDRAFT_57709	145.048	805.131	5.55079	2.47269	2.84544e-18	3.46675e-16	UP	NA	NA	NA	NA	NA	NA	NA	NA	NA
gene1117	17358406	CHLNCDRAFT_18970	20.5002	117.059	5.71016	2.51353	2.53724e-07	6.10523e-06	UP	NA	NA	NA	NA	NA	NA	NA	NA	NA
gene8295	17351318	CHLNCDRAFT_139625	45.1889	258.543	5.72138	2.51636	1.1943e-11	6.42184e-10	UP	NA	NA	NA	NA	NA	NA	NA	NA	NA
gene388	17359078	CHLNCDRAFT_133361	7.27822	41.7704	5.73909	2.52082	0.000149447	0.00174144	UP	NA	NA	NA	NA	NA	NA	NA	NA	NA
gene5735	17353767	CHLNCDRAFT_135473	38.6125	222.027	5.75012	2.52359	1.27984e-10	6.00899e-09	UP	NA	NA	NA	NA	NA	NA	NA	NA	NA
gene9321	17350261	CHLNCDRAFT_141740	59.608	343.85	5.76852	2.5282	5.86115e-14	4.51308e-12	UP	NA	NA	NA	NA	NA	NA	NA	NA	NA
gene814	17358628	CHLNCDRAFT_137757	320.181	1849.01	5.77488	2.52979	6.66774e-18	7.82646e-16	UP	NA	NA	NA	NA	NA	NA	NA	NA	NA
gene6389	17353233	CHLNCDRAFT_136326	25.6466	148.565	5.7928	2.53426	2.47967e-08	7.44543e-07	UP	NA	NA	NA	NA	NA	NA	NA	NA	NA
gene3719	17355595	CHLNCDRAFT_144691	60.4493	350.761	5.80257	2.53669	3.48022e-14	2.76836e-12	UP	NA	NA	NA	NA	NA	NA	NA	NA	NA
gene5169	17354244	CHLNCDRAFT_134730	2.52101	14.8606	5.89469	2.55942	0.00475983	0.0315519	UP	NA	NA	NA	NA	NA	NA	NA	NA	NA
gene755	17358981	CHLNCDRAFT_137684	53.0354	313.203	5.90554	2.56207	1.62643e-13	1.17702e-11	UP	NA	NA	NA	NA	NA	NA	NA	NA	NA
gene1778	17357896	CHLNCDRAFT_17788	35.9259	216.888	6.03711	2.59386	8.32943e-11	3.96885e-09	UP	NA	NA	NA	NA	NA	NA	NA	NA	NA
gene8511	17351114	CHLNCDRAFT_139910	13.4903	81.5227	6.04306	2.59528	2.73215e-06	5.16639e-05	UP	NA	NA	NA	NA	NA	NA	NA	NA	NA
gene4216	17355511	CHLNCDRAFT_22703	105.05	636.539	6.05939	2.59917	4.85323e-19	6.57921e-17	UP	NA	NA	NA	NA	NA	NA	NA	NA	NA
gene8918	17350675	CHLNCDRAFT_55239	27.8236	169.333	6.08595	2.60548	1.74046e-09	6.6476e-08	UP	NA	NA	NA	NA	NA	NA	NA	NA	NA
gene9417	17350194	CHLNCDRAFT_142499	405.42	2473.96	6.10221	2.60933	1.57229e-17	1.75969e-15	UP	NA	NA	NA	NA	NA	NA	NA	NA	NA
gene5137	17354380	CHLNCDRAFT_52718	1.93619	11.8315	6.11073	2.61134	0.00756355	0.0452731	UP	NA	NA	NA	NA	NA	NA	NA	NA	NA
gene266	17359509	CHLNCDRAFT_133197	27.9737	173.219	6.19223	2.63046	1.14463e-09	4.5714e-08	UP	NA	NA	NA	NA	NA	NA	NA	NA	NA
gene7843	17351673	CHLNCDRAFT_139023	77.6472	500.615	6.44731	2.6887	2.10796e-18	2.63495e-16	UP	NA	NA	NA	NA	NA	NA	NA	NA	NA
gene1052	17358623	CHLNCDRAFT_138035	35.2814	230.234	6.52565	2.70612	5.005e-12	2.85048e-10	UP	NA	NA	NA	NA	NA	NA	NA	NA	NA
gene2138	17357724	CHLNCDRAFT_142252	21.4907	140.374	6.53185	2.70749	7.62283e-09	2.54756e-07	UP	NA	NA	NA	NA	NA	NA	NA	NA	NA
gene9109	17350546	CHLNCDRAFT_141450	23.5165	154.478	6.56893	2.71566	1.80194e-09	6.8282e-08	UP	NA	NA	NA	NA	NA	NA	NA	NA	NA
gene1606	17358181	CHLNCDRAFT_50360	17.4688	115.63	6.61926	2.72667	4.86874e-08	1.38235e-06	UP	NA	NA	NA	NA	NA	NA	NA	NA	NA
gene1762	17358121	CHLNCDRAFT_140894	386.01	2572.37	6.66399	2.73639	6.96965e-19	9.31707e-17	UP	NA	NA	NA	NA	NA	NA	NA	NA	NA
gene415	17359273	CHLNCDRAFT_133395	20.4546	137.798	6.73677	2.75206	6.39388e-09	2.16694e-07	UP	NA	NA	NA	NA	NA	NA	NA	NA	NA
gene8463	17351098	CHLNCDRAFT_139842	18.4745	128.745	6.96884	2.80092	7.34338e-09	2.47133e-07	UP	NA	NA	NA	NA	NA	NA	NA	NA	NA
gene3569	17356173	CHLNCDRAFT_144424	8.25349	58.0708	7.0359	2.81474	5.8116e-06	0.000102261	UP	NA	NA	NA	NA	NA	NA	NA	NA	NA
gene8284	17351352	CHLNCDRAFT_139611	31.4864	221.56	7.03668	2.81489	2.54383e-12	1.55137e-10	UP	NA	NA	NA	NA	NA	NA	NA	NA	NA
gene1517	17358268	CHLNCDRAFT_140599	75.5323	538.294	7.12667	2.83323	1.31452e-20	2.2197e-18	UP	NA	NA	NA	NA	NA	NA	NA	NA	NA
gene7768	17351949	CHLNCDRAFT_138915	9.73965	69.519	7.13772	2.83546	1.50217e-06	3.09601e-05	UP	NA	NA	NA	NA	NA	NA	NA	NA	NA
gene632	17359241	CHLNCDRAFT_6787	25.5574	183.125	7.16521	2.84101	3.96767e-11	1.99941e-09	UP	NA	NA	NA	NA	NA	NA	NA	NA	NA
gene821	17358552	CHLNCDRAFT_137765	22.5268	163.247	7.24678	2.85734	1.70039e-10	7.83074e-09	UP	NA	NA	NA	NA	NA	NA	NA	NA	NA
gene3896	17355871	CHLNCDRAFT_144926	14.7073	107.227	7.2907	2.86606	3.33895e-08	9.94965e-07	UP	NA	NA	NA	NA	NA	NA	NA	NA	NA
gene112	17359305	CHLNCDRAFT_133010	75.6383	553.25	7.31442	2.87074	3.72207e-21	6.51361e-19	UP	NA	NA	NA	NA	NA	NA	NA	NA	NA
gene7099	17352389	CHLNCDRAFT_54016	4.99807	36.5998	7.32278	2.87239	1.96664e-05	0.000304813	UP	NA	NA	NA	NA	NA	NA	NA	NA	NA
gene6310	17353496	CHLNCDRAFT_136205	16.057	118.113	7.3559	2.8789	1.18385e-08	3.78556e-07	UP	NA	NA	NA	NA	NA	NA	NA	NA	NA
gene6812	17352694	CHLNCDRAFT_136932	29.0098	220.898	7.61459	2.92877	4.11336e-13	2.84828e-11	UP	NA	NA	NA	NA	NA	NA	NA	NA	NA
gene1102	17358441	CHLNCDRAFT_48490	15.9822	121.801	7.62104	2.92999	4.17694e-09	1.46193e-07	UP	NA	NA	NA	NA	NA	NA	NA	NA	NA
gene7500	17352070	CHLNCDRAFT_138566	2.16099	17.1882	7.95384	2.99165	0.00113618	0.00966057	UP	NA	NA	NA	NA	NA	NA	NA	NA	NA
gene543	17359199	CHLNCDRAFT_59546	44.181	352.537	7.97938	2.99628	5.59306e-18	6.64607e-16	UP	NA	NA	NA	NA	NA	NA	NA	NA	NA
gene1545	17358319	CHLNCDRAFT_50324	3.51192	28.1165	8.006	3.00108	0.000103376	0.00127727	UP	NA	NA	NA	NA	NA	NA	NA	NA	NA
gene6699	17352847	CHLNCDRAFT_136757	87.8829	729.174	8.29711	3.05261	7.02721e-25	1.6104e-22	UP	NA	NA	NA	NA	NA	NA	NA	NA	NA
gene5704	17354059	CHLNCDRAFT_135410	17.3792	146.401	8.42391	3.07449	7.61262e-11	3.68198e-09	UP	NA	NA	NA	NA	NA	NA	NA	NA	NA
gene2999	17356700	CHLNCDRAFT_143608	22.7525	193.207	8.49167	3.08605	7.56355e-13	5.1267e-11	UP	NA	NA	NA	NA	NA	NA	NA	NA	NA
gene5143	17354202	CHLNCDRAFT_134699	79.9759	684.863	8.56337	3.09818	3.17095e-25	7.82573e-23	UP	NA	NA	NA	NA	NA	NA	NA	NA	NA
gene5262	17354529	CHLNCDRAFT_134835	17.844	154.739	8.67176	3.11632	2.75615e-11	1.42624e-09	UP	NA	NA	NA	NA	NA	NA	NA	NA	NA
gene4569	17355115	CHLNCDRAFT_133897	51.3436	448.383	8.73299	3.12648	6.71659e-22	1.29294e-19	UP	NA	NA	NA	NA	NA	NA	NA	NA	NA
gene7438	17352264	CHLNCDRAFT_138469	12.2624	110.511	9.01219	3.17188	1.45175e-09	5.65713e-08	UP	NA	NA	NA	NA	NA	NA	NA	NA	NA
gene111	17359304	CHLNCDRAFT_133009	214.8	1956.01	9.10621	3.18685	6.69157e-26	1.74071e-23	UP	NA	NA	NA	NA	NA	NA	NA	NA	NA
gene7898	17351766	CHLNCDRAFT_54548	31.1695	289.791	9.29726	3.21681	1.78139e-17	1.94839e-15	UP	NA	NA	NA	NA	NA	NA	NA	NA	NA
gene1516	17358267	CHLNCDRAFT_140598	6.2873	58.5773	9.31677	3.21983	6.53681e-07	1.45979e-05	UP	NA	NA	NA	NA	NA	NA	NA	NA	NA
gene4942	17354587	CHLNCDRAFT_134397	6.75383	64.6354	9.57019	3.25855	1.85674e-07	4.62982e-06	UP	NA	NA	NA	NA	NA	NA	NA	NA	NA
gene9482	17350151	CHLNCDRAFT_142589	79.9747	767.606	9.59811	3.26275	5.10231e-28	1.63699e-25	UP	NA	NA	NA	NA	NA	NA	NA	NA	NA
gene9222	17350410	CHLNCDRAFT_141607	20.695	201.508	9.73703	3.28348	3.16676e-14	2.54001e-12	UP	NA	NA	NA	NA	NA	NA	NA	NA	NA
gene2726	17356933	CHLNCDRAFT_143178	2.86667	29.1904	10.1827	3.34805	2.19315e-05	0.000335065	UP	NA	NA	NA	NA	NA	NA	NA	NA	NA
gene6202	17353444	CHLNCDRAFT_136074	126.436	1340.75	10.6041	3.40656	2.05414e-30	7.88533e-28	UP	NA	NA	NA	NA	NA	NA	NA	NA	NA
gene8292	17351380	CHLNCDRAFT_139622	2.80624	30.0608	10.7121	3.42117	2.07353e-05	0.000319836	UP	NA	NA	NA	NA	NA	NA	NA	NA	NA
gene3380	17356088	CHLNCDRAFT_144183	10.7124	119.043	11.1127	3.47414	7.30534e-11	3.55121e-09	UP	NA	NA	NA	NA	NA	NA	NA	NA	NA
gene993	17358853	CHLNCDRAFT_137959	6.70861	75.4853	11.252	3.49211	7.84758e-09	2.6136e-07	UP	NA	NA	NA	NA	NA	NA	NA	NA	NA
gene1515	17358210	CHLNCDRAFT_140597	67.4292	763.79	11.3273	3.50173	8.01295e-31	3.21353e-28	UP	NA	NA	NA	NA	NA	NA	NA	NA	NA
gene5280	17354339	CHLNCDRAFT_134854	11.3454	129.541	11.4179	3.51323	1.05381e-11	5.73045e-10	UP	NA	NA	NA	NA	NA	NA	NA	NA	NA
gene528	17359570	CHLNCDRAFT_18747	12.0806	143.288	11.8609	3.56815	8.67201e-13	5.7964e-11	UP	NA	NA	NA	NA	NA	NA	NA	NA	NA
gene6757	17352940	CHLNCDRAFT_136841	10.3258	125.336	12.1382	3.60149	5.3388e-12	3.00503e-10	UP	NA	NA	NA	NA	NA	NA	NA	NA	NA
gene4374	17355335	CHLNCDRAFT_145558	261.623	3251.19	12.427	3.63541	3.06132e-28	1.01604e-25	UP	NA	NA	NA	NA	NA	NA	NA	NA	NA
gene6920	17352725	CHLNCDRAFT_137071	1.24572	15.5795	12.5064	3.6446	0.000298793	0.00316031	UP	NA	NA	NA	NA	NA	NA	NA	NA	NA
gene1158	17358449	CHLNCDRAFT_138162	26.1418	335.966	12.8517	3.68388	5.60251e-23	1.17226e-20	UP	NA	NA	NA	NA	NA	NA	NA	NA	NA
gene2047	17357678	CHLNCDRAFT_142143	0.600036	7.9294	13.2149	3.72409	0.00367229	0.0256315	UP	NA	NA	NA	NA	NA	NA	NA	NA	NA
gene3131	17356419	CHLNCDRAFT_11072	9.69572	133.531	13.7721	3.78368	3.48216e-13	2.44641e-11	UP	NA	NA	NA	NA	NA	NA	NA	NA	NA
gene7082	17352439	CHLNCDRAFT_137284	2.47579	35.0637	14.1626	3.82402	1.64763e-06	3.33161e-05	UP	NA	NA	NA	NA	NA	NA	NA	NA	NA
gene9099	17350522	CHLNCDRAFT_141436	18.0992	274.941	15.1907	3.92512	1.19665e-21	2.21496e-19	UP	NA	NA	NA	NA	NA	NA	NA	NA	NA
gene6203	17353425	CHLNCDRAFT_136075	12.5315	194.749	15.5407	3.95798	1.39666e-17	1.58731e-15	UP	NA	NA	NA	NA	NA	NA	NA	NA	NA
gene5338	17354195	CHLNCDRAFT_134923	1.32093	20.6406	15.6258	3.96586	2.36812e-05	0.0003567	UP	NA	NA	NA	NA	NA	NA	NA	NA	NA
gene605	17359237	CHLNCDRAFT_56626	42.3053	759.697	17.9575	4.16651	1.51096e-39	9.0894e-37	UP	NA	NA	NA	NA	NA	NA	NA	NA	NA
gene6758	17352946	CHLNCDRAFT_136842	0.600036	11.0945	18.4897	4.20865	0.000583512	0.00567303	UP	NA	NA	NA	NA	NA	NA	NA	NA	NA
gene9253	17350407	CHLNCDRAFT_141644	69.8594	1339.47	19.1738	4.26106	1.11343e-42	8.24364e-40	UP	NA	NA	NA	NA	NA	NA	NA	NA	NA
gene9418	17350191	CHLNCDRAFT_142500	112.076	2176.96	19.424	4.27977	2.73226e-40	1.7532e-37	UP	NA	NA	NA	NA	NA	NA	NA	NA	NA
gene8857	17350759	CHLNCDRAFT_141139	15.4882	357.306	23.0696	4.52792	6.02548e-31	2.52153e-28	UP	NA	NA	NA	NA	NA	NA	NA	NA	NA
gene1801	17358281	CHLNCDRAFT_140944	0.315234	9.8778	31.3348	4.9697	0.000418063	0.00423564	UP	NA	NA	NA	NA	NA	NA	NA	NA	NA
gene8840	17350776	CHLNCDRAFT_141112	0.975701	40.1114	41.1104	5.36143	1.75154e-09	6.66345e-08	UP	NA	NA	NA	NA	NA	NA	NA	NA	NA
gene1800	17358024	CHLNCDRAFT_140943	0.91527	50.3792	55.043	5.78249	4.23415e-11	2.11159e-09	UP	NA	NA	NA	NA	NA	NA	NA	NA	NA
gene1986	17357580	CHLNCDRAFT_142072	10.6406	1663.89	156.373	7.28885	3.59795e-81	8.65756e-78	UP	NA	NA	NA	NA	NA	NA	NA	NA	NA
gene3002	17356642	CHLNCDRAFT_143613	23.7417	4224.38	177.931	7.47517	6.05217e-72	1.16504e-68	UP	NA	NA	NA	NA	NA	NA	NA	NA	NA
gene7047	17352836	CHLNCDRAFT_137219	40.64	18197.9	447.783	8.80665	1.17586e-70	1.88628e-67	UP	NA	NA	NA	NA	NA	NA	NA	NA	NA
gene5838	17353611	CHLNCDRAFT_9535	139.553	259.725	1.86112	0.896174	0.00474501	0.0314971	UP	NAD(P)/FAD-dependent_oxidoreductase	EEY24_02385	Shewanella_algae	NA	integral_component_of_membrane [GO:0016021]	GO:0016021	NA	NA	GO:0016021~integral_component_of_membrane
gene1689	17357825	CHLNCDRAFT_19514	437.689	823.447	1.88135	0.911768	0.000675696	0.00638905	UP	Nicotinate-nucleotide_diphosphorylase (Carboxylating)	BKP44_10335	Formosa_algae	NA	nicotinate-nucleotide_diphosphorylase (carboxylating) activity [GO:0004514]; NAD_biosynthetic_process [GO:0009435]	GO:0004514; GO:0009435	GO:0004514~nicotinate-nucleotide_diphosphorylase (carboxylating) activity	GO:0009435~NAD_biosynthetic_process	NA
gene2107	17357390	CHLNCDRAFT_34412	398.447	693.33	1.74008	0.799153	0.00275862	0.0206147	UP	Nitrite_transporter_NAR1	NAR1;2_Esi_0072_0044	Ectocarpus_siliculosus (Brown_alga) (Conferva_siliculosa)	NA	integral_component_of_membrane [GO:0016021]; transmembrane_transporter_activity [GO:0022857]	GO:0016021; GO:0022857	GO:0022857~transmembrane_transporter_activity	NA	GO:0016021~integral_component_of_membrane
gene2666	17357288	CHLNCDRAFT_143107	750.702	1748.74	2.32947	1.22	2.1285e-05	0.000326743	UP	Peptidyl-prolyl_cis-trans_isomerase (PPIase) (EC_5.2.1.8)	Esi_0026_0126	Ectocarpus_siliculosus (Brown_alga) (Conferva_siliculosa)	NA	peptidyl-prolyl_cis-trans_isomerase_activity [GO:0003755]; protein_folding [GO:0006457]	GO:0003755; GO:0006457	GO:0003755~peptidyl-prolyl_cis-trans_isomerase_activity	GO:0006457~protein_folding	NA
gene811	17358622	CHLNCDRAFT_56692	1407.47	2628.99	1.86788	0.901405	0.00293864	0.0216573	UP	Potassium_transporter_TrkA	BFS86_07620	Shewanella_algae	NA	integral_component_of_membrane [GO:0016021]; cation_transmembrane_transporter_activity [GO:0008324]; potassium_ion_transport [GO:0006813]	GO:0006813; GO:0008324; GO:0016021	GO:0008324~cation_transmembrane_transporter_activity	GO:0006813~potassium_ion_transport	GO:0016021~integral_component_of_membrane
gene4659	17355134	CHLNCDRAFT_7254	140.109	345.064	2.46283	1.30032	1.72335e-05	0.000271477	UP	Predicted_ATPase_of_the_ABC_class	Esi_0280_0006	Ectocarpus_siliculosus (Brown_alga) (Conferva_siliculosa)	NA	NA	NA	NA	NA	NA
gene4814	17354780	CHLNCDRAFT_35537	241.111	487.169	2.02052	1.01472	0.000199491	0.00223787	UP	Prolycopene_isomerase	crtISO	Proteomonas_sulcata	NA	isomerase_activity [GO:0016853]	GO:0016853	GO:0016853~isomerase_activity	NA	NA
gene2796	17357001	CHLNCDRAFT_143267	4051.6	9629.08	2.37661	1.24891	0.000368549	0.00380017	UP	Protein_for_assembly_of_pre-ribosomal_particles_containing_18S_rRNA	Esi_0145_0036	Ectocarpus_siliculosus (Brown_alga) (Conferva_siliculosa)	NA	RNA_binding [GO:0003723]	GO:0003723	GO:0003723~RNA_binding	NA	NA
gene1639	17358053	CHLNCDRAFT_140750	34.2475	156.233	4.5619	2.18963	3.09017e-07	7.23672e-06	UP	Receptor-like_kinase	MpRLK18_MARPO_0004s0100	Marchantia_polymorpha (Liverwort) (Marchantia_aquatica)	NA	integral_component_of_membrane [GO:0016021]; ATP_binding [GO:0005524]; protein_kinase_activity [GO:0004672]	GO:0004672; GO:0005524; GO:0016021	GO:0004672~protein_kinase_activity;GO:0005524~ATP_binding	NA	GO:0016021~integral_component_of_membrane
gene4351	17355429	CHLNCDRAFT_145520	193.801	364.503	1.88081	0.911354	0.00177174	0.0140701	UP	Ribosomal_large_subunit_pseudouridine_synthase_D (EC_4.2.1.70)	REIFOR_00212	Reinekea_forsetii	NA	pseudouridine_synthase_activity [GO:0009982]; pseudouridylate_synthase_activity [GO:0004730]; RNA_binding [GO:0003723]	GO:0003723; GO:0004730; GO:0009982	GO:0003723~RNA_binding;GO:0004730~pseudouridylate_synthase_activity;GO:0009982~pseudouridine_synthase_activity	NA	NA
gene5490	17354084	CHLNCDRAFT_15607	1699.74	3127.35	1.83989	0.879622	0.0050429	0.0329071	UP	Ribosomal_protein_L27	rpl27	Phaeocystis_antarctica	NA	plastid [GO:0009536]; ribosome [GO:0005840]; structural_constituent_of_ribosome [GO:0003735]; translation [GO:0006412]	GO:0003735; GO:0005840; GO:0006412; GO:0009536	GO:0003735~structural_constituent_of_ribosome	GO:0006412~translation	GO:0005840~ribosome;GO:0009536~plastid
gene9541	17350081	CHLNCDRAFT_28885	31.4903	715.037	22.7066	4.50504	9.30776e-47	7.4656e-44	UP	rRNA_intron-encoded_homing_endonuclease	Esi_0084_0039	Ectocarpus_siliculosus (Brown_alga) (Conferva_siliculosa)	NA	endonuclease_activity [GO:0004519]	GO:0004519	GO:0004519~endonuclease_activity	NA	NA
gene1563	17357930	CHLNCDRAFT_140658	19.7789	83.1689	4.20493	2.07208	9.09134e-05	0.00114684	UP	TSO1_transcription_factor (Partial) (Fragment)	TSO_Esi_0052_0046	Ectocarpus_siliculosus (Brown_alga) (Conferva_siliculosa)	NA	NA	NA	NA	NA	NA
gene361	17359618	CHLNCDRAFT_133322	589.924	982.201	1.66496	0.735488	0.00672962	0.0412302	UP	Uncharacterized_protein	Esi_0030_0182	Ectocarpus_siliculosus (Brown_alga) (Conferva_siliculosa)	NA	catalytic_activity [GO:0003824]	GO:0003824	GO:0003824~catalytic_activity	NA	NA
gene1244	17357870	CHLNCDRAFT_140272	659.177	1119.21	1.69789	0.763741	0.00495083	0.0324382	UP	Uncharacterized_protein	Esi_0333_0009	Ectocarpus_siliculosus (Brown_alga) (Conferva_siliculosa)	NA	NA	NA	NA	NA	NA
gene7219	17352548	CHLNCDRAFT_26239	328.328	564.768	1.72013	0.782518	0.00407637	0.0279651	UP	Uncharacterized_protein	Esi_0046_0022	Ectocarpus_siliculosus (Brown_alga) (Conferva_siliculosa)	NA	cell [GO:0005623]; cell_redox_homeostasis [GO:0045454]	GO:0005623; GO:0045454	NA	GO:0045454~cell_redox_homeostasis	GO:0005623~cell
gene4861	17354715	CHLNCDRAFT_52504	348.775	626.897	1.79743	0.845934	0.00165804	0.0132989	UP	Uncharacterized_protein	Esi_0009_0144	Ectocarpus_siliculosus (Brown_alga) (Conferva_siliculosa)	NA	NA	NA	NA	NA	NA
gene502	17359485	CHLNCDRAFT_17399	318.856	596.125	1.86957	0.90271	0.000752231	0.00700215	UP	Uncharacterized_protein	Esi_0057_0098	Ectocarpus_siliculosus (Brown_alga) (Conferva_siliculosa)	NA	peptide-methionine (R)-S-oxide_reductase_activity [GO:0033743]	GO:0033743	GO:0033743~peptide-methionine (R)-S-oxide_reductase_activity	NA	NA
gene2342	17356982	CHLNCDRAFT_50851	455.832	942.16	2.0669	1.04747	0.000115171	0.00140141	UP	Uncharacterized_protein	Esi_0004_0041	Ectocarpus_siliculosus (Brown_alga) (Conferva_siliculosa)	NA	NA	NA	NA	NA	NA
gene5579	17353950	CHLNCDRAFT_135248	135.318	283.142	2.09242	1.06518	0.000678477	0.00639602	UP	Uncharacterized_protein	Esi_0287_0003	Ectocarpus_siliculosus (Brown_alga) (Conferva_siliculosa)	NA	NA	NA	NA	NA	NA
gene8311	17351241	CHLNCDRAFT_27602	358.694	781.018	2.17739	1.1226	2.94367e-05	0.000427343	UP	Uncharacterized_protein	Esi_0067_0103	Ectocarpus_siliculosus (Brown_alga) (Conferva_siliculosa)	NA	integral_component_of_membrane [GO:0016021]	GO:0016021	NA	NA	GO:0016021~integral_component_of_membrane
gene8173	17351405	CHLNCDRAFT_8704	156.605	353.291	2.25594	1.17373	7.1306e-05	0.000931235	UP	Uncharacterized_protein	Esi_0226_0039	Ectocarpus_siliculosus (Brown_alga) (Conferva_siliculosa)	NA	methyltransferase_activity [GO:0008168]	GO:0008168	GO:0008168~methyltransferase_activity	NA	NA
gene8345	17351214	CHLNCDRAFT_27566	33120.6	76629	2.31364	1.21016	0.000251334	0.00273035	UP	Uncharacterized_protein	Esi_0090_0028	Ectocarpus_siliculosus (Brown_alga) (Conferva_siliculosa)	NA	NA	NA	NA	NA	NA
gene119	17359451	CHLNCDRAFT_133017	122.31	340.627	2.78496	1.47766	1.62957e-06	3.30787e-05	UP	Uncharacterized_protein	Esi_0252_0008	Ectocarpus_siliculosus (Brown_alga) (Conferva_siliculosa)	NA	NA	NA	NA	NA	NA
gene2470	17356885	CHLNCDRAFT_142854	39.1851	215.772	5.50647	2.46113	3.79644e-10	1.61685e-08	UP	Uncharacterized_protein	A9C19_15435	Bacillus_weihaiensis	NA	integral_component_of_membrane [GO:0016021]; hydrolase_activity, hydrolyzing_O-glycosyl_compounds [GO:0004553]; carbohydrate_metabolic_process [GO:0005975]	GO:0004553; GO:0005975; GO:0016021	GO:0004553~hydrolase_activity, hydrolyzing_O-glycosyl_compounds	GO:0005975~carbohydrate_metabolic_process	GO:0016021~integral_component_of_membrane
gene7495	17352111	CHLNCDRAFT_58787	30.4942	177.894	5.83369	2.54441	2.36417e-09	8.68913e-08	UP	Uncharacterized_protein (Fragment)	NA	Platydorina_caudata	NA	integral_component_of_membrane [GO:0016021]	GO:0016021	NA	NA	GO:0016021~integral_component_of_membrane
gene4108	17355314	CHLNCDRAFT_51983	42.0818	250.182	5.94514	2.57171	6.79872e-12	3.80451e-10	UP	Uncharacterized_protein (Fragment)	Esi_0314_0030	Ectocarpus_siliculosus (Brown_alga) (Conferva_siliculosa)	NA	regulation_of_transcription, DNA-templated [GO:0006355]	GO:0006355	NA	GO:0006355~regulation_of_transcription, DNA-templated	NA
gene1768	17358124	CHLNCDRAFT_140903	284.971	694.738	2.43793	1.28565	1.82928e-06	3.64531e-05	UP	Zinc/cadmium/mercury/lead-transporting_ATPase	BFS86_11685	Shewanella_algae	NA	integral_component_of_membrane [GO:0016021]; plasma_membrane [GO:0005886]; ATP_binding [GO:0005524]; cation-transporting_ATPase_activity [GO:0019829]; metal_ion_binding [GO:0046872]; metal_ion_transport [GO:0030001]	GO:0005524; GO:0005886; GO:0016021; GO:0019829; GO:0030001; GO:0046872	GO:0005524~ATP_binding;GO:0019829~cation-transporting_ATPase_activity;GO:0046872~metal_ion_binding	GO:0030001~metal_ion_transport	GO:0005886~plasma_membrane;GO:0016021~integral_component_of_membrane
gene2961	17356664	CHLNCDRAFT_56094	2125.44	4206.14	1.97895	0.984733	0.00258137	0.0193955	UP	Inorganic_pyrophosphatase (EC_3.6.1.1)	IPY_Esi_0144_0027	Ectocarpus_siliculosus (Brown_alga) (Conferva_siliculosa)	Oxidative_phosphorylation [00190]	cytoplasm [GO:0005737]; inorganic_diphosphatase_activity [GO:0004427]; magnesium_ion_binding [GO:0000287]; phosphate-containing_compound_metabolic_process [GO:0006796]	GO:0000287; GO:0004427; GO:0005737; GO:0006796	GO:0000287~magnesium_ion_binding;GO:0004427~inorganic_diphosphatase_activity	GO:0006796~phosphate-containing_compound_metabolic_process	GO:0005737~cytoplasm
gene2506	17356959	CHLNCDRAFT_20847	499.307	835.43	1.67318	0.742592	0.00585148	0.0370773	UP	Phosphoribosyl-AMP_cyclohydrolase (PRA-CH) (EC_3.5.4.19)	hisI_REIFOR_02587	Reinekea_forsetii	PATHWAY: Amino-acid_biosynthesis; L-histidine_biosynthesis; L-histidine_from_5-phospho-alpha-D-ribose_1-diphosphate: step_3/9. {ECO:0000256|HAMAP-Rule:MF_01021, ECO:0000256|SAAS:SAAS00976563}.; Histidine_metabolism [00340]	cytoplasm [GO:0005737]; magnesium_ion_binding [GO:0000287]; phosphoribosyl-AMP_cyclohydrolase_activity [GO:0004635]; zinc_ion_binding [GO:0008270]; histidine_biosynthetic_process [GO:0000105]	GO:0000105; GO:0000287; GO:0004635; GO:0005737; GO:0008270	GO:0000287~magnesium_ion_binding;GO:0004635~phosphoribosyl-AMP_cyclohydrolase_activity;GO:0008270~zinc_ion_binding	GO:0000105~histidine_biosynthetic_process	GO:0005737~cytoplasm
gene1384	17357974	CHLNCDRAFT_48525	628.091	1110.01	1.76727	0.821521	0.00254613	0.0191907	UP	1,2-dihydroxy-3-keto-5-methylthiopentene_dioxygenase (EC_1.13.11.54) (Acireductone_dioxygenase (Fe(2+)-requiring)) (ARD) (Fe-ARD)	Esi_0058_0136	Ectocarpus_siliculosus (Brown_alga) (Conferva_siliculosa)	PATHWAY: Amino-acid_biosynthesis; L-methionine_biosynthesis_via_salvage_pathway; L-methionine_from_S-methyl-5-thio-alpha-D-ribose_1-phosphate: step_5/6. {ECO:0000256|HAMAP-Rule:MF_03154, ECO:0000256|SAAS:SAAS00003708}.; Cysteine_and_methionine_metabolism [00270]	cytoplasm [GO:0005737]; nucleus [GO:0005634]; acireductone_dioxygenase [iron(II)-requiring] activity [GO:0010309]; iron_ion_binding [GO:0005506]; L-methionine_salvage_from_methylthioadenosine [GO:0019509]	GO:0005506; GO:0005634; GO:0005737; GO:0010309; GO:0019509	GO:0005506~iron_ion_binding;GO:0010309~acireductone_dioxygenase [iron(II)-requiring] activity	GO:0019509~L-methionine_biosynthetic_process_from_methylthioadenosine	GO:0005634~nucleus;GO:0005737~cytoplasm
gene50	17359269	CHLNCDRAFT_56437	1382.34	3170.42	2.29352	1.19756	0.000123212	0.0014787	UP	D-3-phosphoglycerate_dehydrogenase (EC_1.1.1.95)	PGDH_Esi_0134_0030	Ectocarpus_siliculosus (Brown_alga) (Conferva_siliculosa)	PATHWAY: Amino-acid_biosynthesis; L-serine_biosynthesis; L-serine_from_3-phospho-D-glycerate: step_1/3. {ECO:0000256|RuleBase:RU363003}.; Cysteine_and_methionine_metabolism [00270]; Glycine, serine_and_threonine_metabolism [00260]; Exosome [04147]	NAD_binding [GO:0051287]; phosphoglycerate_dehydrogenase_activity [GO:0004617]; L-serine_biosynthetic_process [GO:0006564]	GO:0004617; GO:0006564; GO:0051287	GO:0004617~phosphoglycerate_dehydrogenase_activity;GO:0051287~NAD_binding	GO:0006564~L-serine_biosynthetic_process	NA
gene4237	17355452	CHLNCDRAFT_145382	35.5823	293.998	8.26247	3.04657	1.94489e-16	1.97048e-14	UP	Glyceraldehyde-3-phosphate_dehydrogenase (EC_1.2.1.12)	Esi_0090_0074	Ectocarpus_siliculosus (Brown_alga) (Conferva_siliculosa)	PATHWAY: Carbohydrate_degradation; glycolysis; pyruvate_from_D-glyceraldehyde_3-phosphate: step_1/5. {ECO:0000256|RuleBase:RU361160}.; Exosome [04147]; Glycolysis / Gluconeogenesis [00010]; Carbon_fixation_in_photosynthetic_organisms [00710]; Membrane_trafficking [04131]	glyceraldehyde-3-phosphate_dehydrogenase (NAD+) (phosphorylating) activity [GO:0004365]; NAD_binding [GO:0051287]; NADP_binding [GO:0050661]; glucose_metabolic_process [GO:0006006]; glycolytic_process [GO:0006096]	GO:0004365; GO:0006006; GO:0006096; GO:0050661; GO:0051287	GO:0004365~glyceraldehyde-3-phosphate_dehydrogenase (NAD+) (phosphorylating) activity;GO:0050661~NADP_binding;GO:0051287~NAD_binding	GO:0006006~glucose_metabolic_process;GO:0006096~glycolytic_process	NA
gene714	17358404	CHLNCDRAFT_48457	1966.63	4551.7	2.31446	1.21068	0.000223973	0.00247501	UP	Phosphoglycerate_kinase (EC_2.7.2.3) (Fragment)	PGK	Cyanidioschyzon_merolae (Red_alga)	PATHWAY: Carbohydrate_degradation; glycolysis; pyruvate_from_D-glyceraldehyde_3-phosphate: step_2/5. {ECO:0000256|RuleBase:RU000532}.; Carbon_fixation_in_photosynthetic_organisms [00710]; Exosome [04147]; Glycolysis / Gluconeogenesis [00010]	ATP_binding [GO:0005524]; phosphoglycerate_kinase_activity [GO:0004618]; glycolytic_process [GO:0006096]	GO:0004618; GO:0005524; GO:0006096	GO:0004618~phosphoglycerate_kinase_activity;GO:0005524~ATP_binding	GO:0006096~glycolytic_process	NA
gene6397	17353239	CHLNCDRAFT_136333	168.832	435.601	2.58009	1.36742	2.42786e-06	4.62736e-05	UP	Phosphomethylpyrimidine_synthase (EC_4.1.99.17) (Hydroxymethylpyrimidine_phosphate_synthase) (HMP-P_synthase) (HMP-phosphate_synthase) (HMPP_synthase) (Thiamine_biosynthesis_protein_ThiC)	thiC_LX95_00913	Mesonia_algae	PATHWAY: Cofactor_biosynthesis; thiamine_diphosphate_biosynthesis. {ECO:0000256|HAMAP-Rule:MF_00089, ECO:0000256|SAAS:SAAS00956679}.	4_iron, 4_sulfur_cluster_binding [GO:0051539]; carbon-carbon_lyase_activity [GO:0016830]; zinc_ion_binding [GO:0008270]; thiamine_biosynthetic_process [GO:0009228]; thiamine_diphosphate_biosynthetic_process [GO:0009229]	GO:0008270; GO:0009228; GO:0009229; GO:0016830; GO:0051539	GO:0008270~zinc_ion_binding;GO:0016830~carbon-carbon_lyase_activity;GO:0051539~4_iron, 4_sulfur_cluster_binding	GO:0009228~thiamine_biosynthetic_process;GO:0009229~thiamine_diphosphate_biosynthetic_process	NA
gene5562	17354092	CHLNCDRAFT_24638	429.857	1277.49	2.9719	1.57139	1.31611e-08	4.19456e-07	UP	Bifunctional_purine_biosynthesis_protein_PurH [Includes: Phosphoribosylaminoimidazolecarboxamide_formyltransferase (EC_2.1.2.3) (AICAR_transformylase); IMP_cyclohydrolase (EC_3.5.4.10) (ATIC) (IMP_synthase) (Inosinicase)]	purH_A9C19_18085	Bacillus_weihaiensis	PATHWAY: Purine_metabolism; IMP_biosynthesis_via_de_novo_pathway; 5-formamido-1-(5-phospho-D-ribosyl)imidazole-4-carboxamide_from_5-amino-1-(5-phospho-D-ribosyl)imidazole-4-carboxamide (10-formyl_THF_route): step_1/1. {ECO:0000256|HAMAP-Rule:MF_00139, ECO:0000256|SAAS:SAAS00010681}.; PATHWAY: Purine_metabolism; IMP_biosynthesis_via_de_novo_pathway; IMP_from_5-formamido-1-(5-phospho-D-ribosyl)imid…	IMP_cyclohydrolase_activity [GO:0003937]; phosphoribosylaminoimidazolecarboxamide_formyltransferase_activity [GO:0004643]; 'de_novo' IMP_biosynthetic_process [GO:0006189]	GO:0003937; GO:0004643; GO:0006189	GO:0003937~IMP_cyclohydrolase_activity;GO:0004643~phosphoribosylaminoimidazolecarboxamide_formyltransferase_activity	GO:0006189~'de_novo' IMP_biosynthetic_process	NA
gene39	17359261	CHLNCDRAFT_132916	203.57	486.229	2.38851	1.25611	8.56444e-06	0.000143611	UP	Phosphoribosylglycinamide_formyltransferase (EC_2.1.2.2) (5'-phosphoribosylglycinamide_transformylase) (GAR_transformylase) (GART)	purN_A9C19_18090	Bacillus_weihaiensis	PATHWAY: Purine_metabolism; IMP_biosynthesis_via_de_novo_pathway; N(2)-formyl-N(1)-(5-phospho-D-ribosyl)glycinamide_from_N(1)-(5-phospho-D-ribosyl)glycinamide (10-formyl_THF_route): step_1/1. {ECO:0000256|HAMAP-Rule:MF_01930}.; One_carbon_pool_by_folate [00670]; Purine_metabolism [00230]	phosphoribosylglycinamide_formyltransferase_activity [GO:0004644]; 'de_novo' IMP_biosynthetic_process [GO:0006189]	GO:0004644; GO:0006189	GO:0004644~phosphoribosylglycinamide_formyltransferase_activity	GO:0006189~'de_novo' IMP_biosynthetic_process	NA
gene2880	17356537	CHLNCDRAFT_48679	883.215	1789.24	2.02583	1.01851	0.00040264	0.00410096	UP	Lactoylglutathione_lyase (EC_4.4.1.5) (Glyoxalase_I)	BFS86_18680	Shewanella_algae	PATHWAY: Secondary_metabolite_metabolism; methylglyoxal_degradation; (R)-lactate_from_methylglyoxal: step_1/2. {ECO:0000256|RuleBase:RU361179}.	lactoylglutathione_lyase_activity [GO:0004462]; metal_ion_binding [GO:0046872]	GO:0004462; GO:0046872	GO:0004462~lactoylglutathione_lyase_activity;GO:0046872~metal_ion_binding	NA	NA
gene27	17359044	CHLNCDRAFT_132900	5.70334	45.4875	7.97559	2.99559	1.03269e-05	0.000171374	UP	Cathepsin_L-like_proteinase (EC_3.4.22.15)	Cys_Esi_0122_0028	Ectocarpus_siliculosus (Brown_alga) (Conferva_siliculosa)	Peptidases [01002]	cysteine-type_peptidase_activity [GO:0008234]	GO:0008234	GO:0008234~cysteine-type_peptidase_activity	NA	NA
gene1086	17358975	CHLNCDRAFT_33905	379.581	649.911	1.71218	0.775836	0.00401714	0.0276969	UP	Leucyl_aminopeptidase (EC_3.4.11.1)	Esi_0355_0015	Ectocarpus_siliculosus (Brown_alga) (Conferva_siliculosa)	Peptidases [01002]; Glutathione_metabolism [00480]	cytoplasm [GO:0005737]; aminopeptidase_activity [GO:0004177]; manganese_ion_binding [GO:0030145]; metalloexopeptidase_activity [GO:0008235]	GO:0004177; GO:0005737; GO:0008235; GO:0030145	GO:0004177~aminopeptidase_activity;GO:0008235~metalloexopeptidase_activity;GO:0030145~manganese_ion_binding	NA	GO:0005737~cytoplasm
gene4072	17355657	CHLNCDRAFT_48761	1307.38	3636.86	2.7818	1.47602	3.69142e-06	6.79349e-05	UP	Chlorophyll_a/b-binding_protein_isoform_4 (Fragment)	NA	Karlodinium_veneficum (Dinoflagellate) (Karlodinium_micrum)	Photosynthesis - antenna_proteins [00196]; Photosynthesis_proteins [00194]	chloroplast_thylakoid_membrane [GO:0009535]; integral_component_of_membrane [GO:0016021]; chlorophyll_binding [GO:0016168]; photosynthesis, light_harvesting [GO:0009765]; protein-chromophore_linkage [GO:0018298]	GO:0009535; GO:0009765; GO:0016021; GO:0016168; GO:0018298	GO:0016168~chlorophyll_binding	GO:0009765~photosynthesis, light_harvesting;GO:0018298~protein-chromophore_linkage	GO:0009535~chloroplast_thylakoid_membrane;GO:0016021~integral_component_of_membrane
gene1602	17358156	CHLNCDRAFT_59584	4102.61	23427.9	5.71048	2.51361	9.77867e-12	5.34771e-10	UP	Light-harvesting_complex_protein_LHCC10 (Fragment)	NA	Rhodomonas_sp. CCMP768	Photosynthesis - antenna_proteins [00196]; Photosynthesis_proteins [00194]	chloroplast_thylakoid_membrane [GO:0009535]; integral_component_of_membrane [GO:0016021]; chlorophyll_binding [GO:0016168]; photosynthesis, light_harvesting [GO:0009765]; protein-chromophore_linkage [GO:0018298]	GO:0009535; GO:0009765; GO:0016021; GO:0016168; GO:0018298	GO:0016168~chlorophyll_binding	GO:0009765~photosynthesis, light_harvesting;GO:0018298~protein-chromophore_linkage	GO:0009535~chloroplast_thylakoid_membrane;GO:0016021~integral_component_of_membrane
gene1613	17358241	CHLNCDRAFT_29874	8885.88	17930.1	2.01782	1.0128	0.00404811	0.0278307	UP	Photosystem_I_reaction_center_subunit_III, chloroplastic (Light-harvesting_complex_I_17_kDa_protein) (P21_protein) (PSI-F)	PSAF	Chlamydomonas_reinhardtii (Chlamydomonas_smithii)	Photosynthesis [00195]; Photosynthesis_proteins [00194]	chloroplast_envelope [GO:0009941]; chloroplast_thylakoid_lumen [GO:0009543]; chloroplast_thylakoid_membrane [GO:0009535]; photosystem_I_reaction_center [GO:0009538]; plastoglobule [GO:0010287]; protein_domain_specific_binding [GO:0019904]; photosynthesis [GO:0015979]	GO:0009535; GO:0009538; GO:0009543; GO:0009941; GO:0010287; GO:0015979; GO:0019904	GO:0019904~protein_domain_specific_binding	GO:0015979~photosynthesis	GO:0009535~chloroplast_thylakoid_membrane;GO:0009538~photosystem_I_reaction_center;GO:0009543~chloroplast_thylakoid_lumen;GO:0009941~chloroplast_envelope;GO:0010287~plastoglobule
gene7721	17351965	CHLNCDRAFT_138861	6029.11	15603.1	2.58796	1.37181	0.000118254	0.0014257	UP	Ferredoxin	petF	Guillardia_theta (Cryptophyte) (Cryptomonas_phi)	Photosynthesis_proteins [00194]; Photosynthesis [00195]	chloroplast [GO:0009507]; 2_iron, 2_sulfur_cluster_binding [GO:0051537]; electron_transfer_activity [GO:0009055]; metal_ion_binding [GO:0046872]	GO:0009055; GO:0009507; GO:0046872; GO:0051537	GO:0009055~electron_carrier_activity;GO:0046872~metal_ion_binding;GO:0051537~2_iron, 2_sulfur_cluster_binding	NA	GO:0009507~chloroplast
gene8356	17351286	CHLNCDRAFT_32868	19301.2	62412.5	3.23361	1.69315	7.70962e-07	1.69032e-05	UP	Oxygen-evolving_enhancer_protein	psbO	Porphyridium_purpureum (Red_alga) (Porphyridium_cruentum)	Photosynthesis_proteins [00194]; Photosynthesis [00195]	photosystem_II_oxygen_evolving_complex [GO:0009654]; oxidation-reduction_process [GO:0055114]; photosystem_II_assembly [GO:0010207]; photosystem_II_stabilization [GO:0042549]	GO:0009654; GO:0010207; GO:0042549; GO:0055114	NA	GO:0010207~photosystem_II_assembly;GO:0042549~photosystem_II_stabilization;GO:0055114~oxidation-reduction_process	GO:0009654~photosystem_II_oxygen_evolving_complex
gene7356	17352340	CHLNCDRAFT_48299	11439.5	28405.1	2.48307	1.31212	0.000193621	0.00217965	UP	Plastocyanin	NA	Ulva_pertusa (Sea_lettuce)	Photosynthesis_proteins [00194]; Photosynthesis [00195]	chloroplast_thylakoid_membrane [GO:0009535]; copper_ion_binding [GO:0005507]; electron_transfer_activity [GO:0009055]	GO:0005507; GO:0009055; GO:0009535	GO:0005507~copper_ion_binding;GO:0009055~electron_carrier_activity	NA	GO:0009535~chloroplast_thylakoid_membrane
gene2455	17357171	CHLNCDRAFT_142838	75.5817	318.636	4.21579	2.0758	3.28753e-10	1.42534e-08	UP	Coproporphyrinogen_oxidase (Aerobic), putative_chloroplast (EC_1.3.3.3)	CPX1_Esi_0154_0036	Ectocarpus_siliculosus (Brown_alga) (Conferva_siliculosa)	Porphyrin_and_chlorophyll_metabolism [00860]	coproporphyrinogen_oxidase_activity [GO:0004109]; porphyrin-containing_compound_biosynthetic_process [GO:0006779]	GO:0004109; GO:0006779	GO:0004109~coproporphyrinogen_oxidase_activity	GO:0006779~porphyrin-containing_compound_biosynthetic_process	NA
gene9029	17350611	CHLNCDRAFT_141338	122.37	320.58	2.61977	1.38944	8.36016e-06	0.000140676	UP	Uroporphyrinogen-III_C-methyltransferase	A9C19_11430	Bacillus_weihaiensis	Porphyrin_and_chlorophyll_metabolism [00860]	methyltransferase_activity [GO:0008168]; oxidation-reduction_process [GO:0055114]; siroheme_biosynthetic_process [GO:0019354]	GO:0008168; GO:0019354; GO:0055114	GO:0008168~methyltransferase_activity	GO:0019354~siroheme_biosynthetic_process;GO:0055114~oxidation-reduction_process	NA
gene7211	17352438	CHLNCDRAFT_137448	820.22	1490.13	1.81675	0.861358	0.00228094	0.0174516	UP	Glutamyl-tRNA_Synthetase (EC_6.1.1.24)	GLURS_Esi_0175_0027	Ectocarpus_siliculosus (Brown_alga) (Conferva_siliculosa)	Porphyrin_and_chlorophyll_metabolism [00860]; Amino_acid_related_enzymes [01007]; Aminoacyl-tRNA_biosynthesis [00970]; Transfer_RNA_biogenesis [03016]; Prokaryotic_defense_system [02048]	cytoplasm [GO:0005737]; ATP_binding [GO:0005524]; glutamate-tRNA_ligase_activity [GO:0004818]; glutamate-tRNA(Gln) ligase_activity [GO:0050561]; glutamyl-tRNA_aminoacylation [GO:0006424]	GO:0004818; GO:0005524; GO:0005737; GO:0006424; GO:0050561	GO:0004818~glutamate-tRNA_ligase_activity;GO:0005524~ATP_binding;GO:0050561~glutamate-tRNA(Gln) ligase_activity	GO:0006424~glutamyl-tRNA_aminoacylation	GO:0005737~cytoplasm
gene2975	17356605	CHLNCDRAFT_143580	418.107	880.75	2.10652	1.07486	7.56961e-05	0.000981907	UP	Uncharacterized_protein	Esi_0010_0177	Ectocarpus_siliculosus (Brown_alga) (Conferva_siliculosa)	Prokaryotic_defense_system [02048]; Chromosome_and_associated_proteins [03036]; Cytoskeleton_proteins [04812]	microtubule [GO:0005874]; GTP_binding [GO:0005525]; GTPase_activity [GO:0003924]; microtubule-based_process [GO:0007017]	GO:0003924; GO:0005525; GO:0005874; GO:0007017	GO:0003924~GTPase_activity;GO:0005525~GTP_binding	GO:0007017~microtubule-based_process	GO:0005874~microtubule
gene8740	17350900	CHLNCDRAFT_33088	449.952	965.552	2.1459	1.10158	4.95549e-05	0.000676547	UP	Possible_MAPK	MAPK_Esi_0050_0096	Ectocarpus_siliculosus (Brown_alga) (Conferva_siliculosa)	Protein_kinases [01001]	ATP_binding [GO:0005524]; protein_kinase_activity [GO:0004672]; ubiquitin-protein_transferase_activity [GO:0004842]	GO:0004672; GO:0004842; GO:0005524	GO:0004672~protein_kinase_activity;GO:0004842~ubiquitin-protein_transferase_activity;GO:0005524~ATP_binding	NA	NA
gene7586	17352062	CHLNCDRAFT_7719	88.3199	183.143	2.07363	1.05216	0.00344011	0.0243822	UP	Tousled-like_protein_kinase	TLPK_Esi_0029_0118	Ectocarpus_siliculosus (Brown_alga) (Conferva_siliculosa)	Protein_kinases [01001]	ATP_binding [GO:0005524]; protein_kinase_activity [GO:0004672]	GO:0004672; GO:0005524	GO:0004672~protein_kinase_activity;GO:0005524~ATP_binding	NA	NA
gene6749	17352855	CHLNCDRAFT_25736	91.1131	184.62	2.02627	1.01883	0.00473517	0.0314751	UP	MEKK_and_related_serine/threonine_protein_kinases_amardillo_repeat-containing_protein	Esi_0036_0073	Ectocarpus_siliculosus (Brown_alga) (Conferva_siliculosa)	Protein_kinases [01001]; MAPK_signaling_pathway - plant [04016]	integral_component_of_membrane [GO:0016021]; ATP_binding [GO:0005524]; protein_serine/threonine_kinase_activity [GO:0004674]	GO:0004674; GO:0005524; GO:0016021	GO:0004674~protein_serine/threonine_kinase_activity;GO:0005524~ATP_binding	NA	GO:0016021~integral_component_of_membrane
gene3962	17355570	CHLNCDRAFT_145010	80.5308	307.971	3.82426	1.93518	4.80346e-09	1.66307e-07	UP	Mitogen-activated_protein_kinase (EC_2.7.11.24)	MAPK	Dunaliella_salina (Green_alga) (Protococcus_salinus)	Protein_kinases [01001]; MAPK_signaling_pathway - plant [04016]	ATP_binding [GO:0005524]; MAP_kinase_activity [GO:0004707]	GO:0004707; GO:0005524	GO:0004707~MAP_kinase_activity;GO:0005524~ATP_binding	NA	NA
gene5589	17354033	CHLNCDRAFT_52984	613.408	1014.13	1.65327	0.725321	0.00745244	0.0447193	UP	Putative_leucine_rich_repeat_protein	Esi_0191_0017	Ectocarpus_siliculosus (Brown_alga) (Conferva_siliculosa)	Protein_kinases [01001]; MAPK_signaling_pathway - plant [04016]	NA	NA	NA	NA	NA
gene1012	17358482	CHLNCDRAFT_18957	247.831	423.424	1.70852	0.772744	0.00547007	0.03517	UP	Uncharacterized_protein	Esi_0055_0008	Ectocarpus_siliculosus (Brown_alga) (Conferva_siliculosa)	Protein_phosphatases_and_associated_proteins [01009]	protein_tyrosine_phosphatase_activity [GO:0004725]; protein_tyrosine/serine/threonine_phosphatase_activity [GO:0008138]; regulation_of_exit_from_mitosis [GO:0007096]	GO:0004725; GO:0007096; GO:0008138	GO:0004725~protein_tyrosine_phosphatase_activity;GO:0008138~protein_tyrosine/serine/threonine_phosphatase_activity	GO:0007096~regulation_of_exit_from_mitosis	NA
gene2872	17356517	CHLNCDRAFT_21604	3.12147	24.4656	7.83785	2.97046	0.000226254	0.00249449	UP	Kinesin-like_protein	Esi_0063_0039	Ectocarpus_siliculosus (Brown_alga) (Conferva_siliculosa)	Protein_phosphatases_and_associated_proteins [01009]; Chromosome_and_associated_proteins [03036]	microtubule [GO:0005874]; ATP_binding [GO:0005524]; microtubule_binding [GO:0008017]; microtubule_motor_activity [GO:0003777]; microtubule-based_movement [GO:0007018]	GO:0003777; GO:0005524; GO:0005874; GO:0007018; GO:0008017	GO:0003777~microtubule_motor_activity;GO:0005524~ATP_binding;GO:0008017~microtubule_binding	GO:0007018~microtubule-based_movement	GO:0005874~microtubule
gene1500	17358143	CHLNCDRAFT_19454	263.965	437.418	1.6571	0.728663	0.00841925	0.0493516	UP	Heat_shock_protein_70	Hsp_Esi_0536_0011	Ectocarpus_siliculosus (Brown_alga) (Conferva_siliculosa)	Protein_processing_in_endoplasmic_reticulum [04141]; Membrane_trafficking [04131]; Mitochondrial_biogenesis [03029]; Spliceosome [03041]; Chaperones_and_folding_catalysts [03110]; Protein_phosphatases_and_associated_proteins [01009]; Endocytosis [04144]; Spliceosome [03040]; Exosome [04147]; Ribosome_biogenesis [03009]; Proteasome [03051]	ATP_binding [GO:0005524]	GO:0005524	GO:0005524~ATP_binding	NA	NA
gene8679	17350888	CHLNCDRAFT_59206	2785.51	5319.78	1.9098	0.933423	0.00539608	0.0348105	UP	Putative_Sec61/secY	Esi_0308_0017	Ectocarpus_siliculosus (Brown_alga) (Conferva_siliculosa)	Protein_processing_in_endoplasmic_reticulum [04141]; Phagosome [04145]; Protein_export [03060]; Secretion_system [02044]	integral_component_of_membrane [GO:0016021]; protein_transport [GO:0015031]	GO:0015031; GO:0016021	NA	GO:0015031~protein_transport	GO:0016021~integral_component_of_membrane
gene2489	17357194	CHLNCDRAFT_20952	135.054	292.672	2.16707	1.11575	0.000335043	0.0034976	UP	Uncharacterized_protein	Esi_0231_0013	Ectocarpus_siliculosus (Brown_alga) (Conferva_siliculosa)	Pyrimidine_metabolism [00240]	ATP_binding [GO:0005524]; thymidylate_kinase_activity [GO:0004798]; dTDP_biosynthetic_process [GO:0006233]	GO:0004798; GO:0005524; GO:0006233	GO:0004798~thymidylate_kinase_activity;GO:0005524~ATP_binding	GO:0006233~dTDP_biosynthetic_process	NA
gene1481	17358070	CHLNCDRAFT_34102	60.8267	737.731	12.1284	3.60032	6.36212e-32	2.91597e-29	UP	Ribonucleoside-diphosphate_reductase	KLA_07462	Cellulophaga_geojensis_KL-A	Pyrimidine_metabolism [00240]; Glutathione_metabolism [00480]; DNA_repair_and_recombination_proteins [03400]; Purine_metabolism [00230]	oxidoreductase_activity [GO:0016491]; deoxyribonucleotide_biosynthetic_process [GO:0009263]	GO:0009263; GO:0016491	GO:0016491~oxidoreductase_activity	GO:0009263~deoxyribonucleotide_biosynthetic_process	NA
gene2525	17357019	CHLNCDRAFT_30376	4885.25	9363.06	1.9166	0.938548	0.0073177	0.0441862	UP	Uncharacterized_protein	Esi_0039_0135	Ectocarpus_siliculosus (Brown_alga) (Conferva_siliculosa)	Pyrimidine_metabolism [00240]; Membrane_trafficking [04131]; MAPK_signaling_pathway - plant [04016]; Purine_metabolism [00230]	nucleoside_diphosphate_kinase_activity [GO:0004550]; CTP_biosynthetic_process [GO:0006241]; GTP_biosynthetic_process [GO:0006183]; UTP_biosynthetic_process [GO:0006228]	GO:0004550; GO:0006183; GO:0006228; GO:0006241	GO:0004550~nucleoside_diphosphate_kinase_activity	GO:0006183~GTP_biosynthetic_process;GO:0006228~UTP_biosynthetic_process;GO:0006241~CTP_biosynthetic_process	NA
gene5682	17353898	CHLNCDRAFT_135382	5600.87	11146.4	1.99012	0.992858	0.00492573	0.0323177	UP	40S_ribosomal_protein_S12	Esi_0108_0011	Ectocarpus_siliculosus (Brown_alga) (Conferva_siliculosa)	Ribosome [03010]; Ribosome [03011]	ribosome [GO:0005840]; structural_constituent_of_ribosome [GO:0003735]; translation [GO:0006412]	GO:0003735; GO:0005840; GO:0006412	GO:0003735~structural_constituent_of_ribosome	GO:0006412~translation	GO:0005840~ribosome
gene4681	17354921	CHLNCDRAFT_31142	2176.73	4110.98	1.8886	0.917318	0.00478072	0.0316033	UP	Probable_30S_ribosomal_protein_3, chloroplastic (PSRP-3)	ycf65	Chlorokybus_atmophyticus (Soil_alga)	Ribosome [03011]	chloroplast [GO:0009507]; ribosome [GO:0005840]; structural_constituent_of_ribosome [GO:0003735]; translation [GO:0006412]	GO:0003735; GO:0005840; GO:0006412; GO:0009507	GO:0003735~structural_constituent_of_ribosome	GO:0006412~translation	GO:0005840~ribosome;GO:0009507~chloroplast
gene4366	17355338	CHLNCDRAFT_22955	3059.6	5905.48	1.93015	0.948713	0.00529213	0.0342778	UP	50S_ribosomal_protein_L13, chloroplastic	rpl13	Guillardia_theta (Cryptophyte) (Cryptomonas_phi)	Ribosome [03011]; Ribosome [03010]	chloroplast [GO:0009507]; ribosome [GO:0005840]; structural_constituent_of_ribosome [GO:0003735]; translation [GO:0006412]	GO:0003735; GO:0005840; GO:0006412; GO:0009507	GO:0003735~structural_constituent_of_ribosome	GO:0006412~translation	GO:0005840~ribosome;GO:0009507~chloroplast
gene6286	17353528	CHLNCDRAFT_56243	1396.54	2647.72	1.89592	0.922895	0.00246016	0.0185718	UP	Uncharacterized_protein	Esi_0063_0061	Ectocarpus_siliculosus (Brown_alga) (Conferva_siliculosa)	Ribosome [03011]; Ribosome [03010]	ribosome [GO:0005840]; structural_constituent_of_ribosome [GO:0003735]; translation [GO:0006412]	GO:0003735; GO:0005840; GO:0006412	GO:0003735~structural_constituent_of_ribosome	GO:0006412~translation	GO:0005840~ribosome
gene8132	17351580	CHLNCDRAFT_139408	583.418	1089.3	1.8671	0.900802	0.000955873	0.00852667	UP	60S_ribosome_subunit_biogenesis_protein_NIP7_homolog	Esi_0000_0389	Ectocarpus_siliculosus (Brown_alga) (Conferva_siliculosa)	Ribosome_biogenesis [03009]	nucleus [GO:0005634]; RNA_binding [GO:0003723]; ribosome_assembly [GO:0042255]	GO:0003723; GO:0005634; GO:0042255	GO:0003723~RNA_binding	GO:0042255~ribosome_assembly	GO:0005634~nucleus
gene7322	17352333	CHLNCDRAFT_26393	67.0722	141.546	2.11035	1.07748	0.00617397	0.0386069	UP	ATP-dependent_RNA_helicase (EC_3.6.4.13)	Esi_0216_0004	Ectocarpus_siliculosus (Brown_alga) (Conferva_siliculosa)	Ribosome_biogenesis [03009]	nucleolus [GO:0005730]; ATP_binding [GO:0005524]; ATP-dependent_RNA_helicase_activity [GO:0004004]; RNA_binding [GO:0003723]	GO:0003723; GO:0004004; GO:0005524; GO:0005730	GO:0003723~RNA_binding;GO:0004004~ATP-dependent_RNA_helicase_activity;GO:0005524~ATP_binding	NA	GO:0005730~nucleolus
gene4552	17355083	CHLNCDRAFT_23258	518.248	865.892	1.67081	0.740545	0.0056825	0.0362692	UP	DEAD_box_helicase	Esi_0179_0060	Ectocarpus_siliculosus (Brown_alga) (Conferva_siliculosa)	Ribosome_biogenesis [03009]	ATP_binding [GO:0005524]; helicase_activity [GO:0004386]; nucleic_acid_binding [GO:0003676]	GO:0003676; GO:0004386; GO:0005524	GO:0003676~nucleic_acid_binding;GO:0004386~helicase_activity;GO:0005524~ATP_binding	NA	NA
gene6843	17352831	CHLNCDRAFT_25981	156.919	391.813	2.49692	1.32015	7.01064e-06	0.000120281	UP	DEAD_box_helicase	Esi_0046_0082	Ectocarpus_siliculosus (Brown_alga) (Conferva_siliculosa)	Ribosome_biogenesis [03009]	ATP_binding [GO:0005524]; helicase_activity [GO:0004386]; nucleic_acid_binding [GO:0003676]	GO:0003676; GO:0004386; GO:0005524	GO:0003676~nucleic_acid_binding;GO:0004386~helicase_activity;GO:0005524~ATP_binding	NA	NA
gene8177	17351414	CHLNCDRAFT_27284	135.203	658.041	4.86706	2.28305	1.54043e-15	1.48266e-13	UP	Protein_SDA1	Esi_0145_0073	Ectocarpus_siliculosus (Brown_alga) (Conferva_siliculosa)	Ribosome_biogenesis [03009]	nucleolus [GO:0005730]; actin_cytoskeleton_organization [GO:0030036]; ribosomal_large_subunit_biogenesis [GO:0042273]; ribosomal_large_subunit_export_from_nucleus [GO:0000055]	GO:0000055; GO:0005730; GO:0030036; GO:0042273	NA	GO:0000055~ribosomal_large_subunit_export_from_nucleus;GO:0030036~actin_cytoskeleton_organization;GO:0042273~ribosomal_large_subunit_biogenesis	GO:0005730~nucleolus
gene9066	17350561	CHLNCDRAFT_141384	238.386	437.718	1.83617	0.876702	0.00174808	0.0138937	UP	Ribosome_biogenesis_protein_WDR12_homolog	Esi_0201_0039	Ectocarpus_siliculosus (Brown_alga) (Conferva_siliculosa)	Ribosome_biogenesis [03009]	nucleolus [GO:0005730]; nucleoplasm [GO:0005654]; preribosome, large_subunit_precursor [GO:0030687]; ribonucleoprotein_complex_binding [GO:0043021]; maturation_of_5.8S_rRNA_from_tricistronic_rRNA_transcript (SSU-rRNA, 5.8S_rRNA, LSU-rRNA) [GO:0000466]; maturation_of_LSU-rRNA_from_tricistronic_rRNA_transcript (SSU-rRNA, 5.8S_rRNA, LSU-rRNA) [GO:0000463]	GO:0000463; GO:0000466; GO:0005654; GO:0005730; GO:0030687; GO:0043021	GO:0043021~ribonucleoprotein_complex_binding	GO:0000463~maturation_of_LSU-rRNA_from_tricistronic_rRNA_transcript (SSU-rRNA, 5.8S_rRNA, LSU-rRNA);GO:0000466~maturation_of_5.8S_rRNA_from_tricistronic_rRNA_transcript (SSU-rRNA, 5.8S_rRNA, LSU-rRNA)	GO:0005654~nucleoplasm;GO:0005730~nucleolus;GO:0030687~preribosome, large_subunit_precursor
gene8965	17350704	CHLNCDRAFT_28229	332.354	694.09	2.0884	1.0624	8.21838e-05	0.00104771	UP	RNA_helicase (EC_3.6.4.13)	Esi_0019_0085	Ectocarpus_siliculosus (Brown_alga) (Conferva_siliculosa)	Ribosome_biogenesis [03009]	ATP_binding [GO:0005524]; helicase_activity [GO:0004386]; RNA_binding [GO:0003723]	GO:0003723; GO:0004386; GO:0005524	GO:0003723~RNA_binding;GO:0004386~helicase_activity;GO:0005524~ATP_binding	NA	NA
gene2015	17357321	CHLNCDRAFT_142104	404.6	762.172	1.88377	0.913621	0.000654877	0.00623461	UP	Uncharacterized_protein	Esi_0513_0011	Ectocarpus_siliculosus (Brown_alga) (Conferva_siliculosa)	Ribosome_biogenesis [03009]	nucleus [GO:0005634]	GO:0005634	NA	NA	GO:0005634~nucleus
gene9400	17350192	CHLNCDRAFT_142475	210.003	410.939	1.95682	0.968512	0.000629224	0.00606234	UP	Uncharacterized_protein	Esi_0414_0006	Ectocarpus_siliculosus (Brown_alga) (Conferva_siliculosa)	Ribosome_biogenesis [03009]	RNA_binding [GO:0003723]; RNA_methyltransferase_activity [GO:0008173]; RNA_processing [GO:0006396]	GO:0003723; GO:0006396; GO:0008173	GO:0003723~RNA_binding;GO:0008173~RNA_methyltransferase_activity	GO:0006396~RNA_processing	NA
gene830	17358643	CHLNCDRAFT_137775	206.574	425.387	2.05925	1.04212	0.000219004	0.00242847	UP	Uncharacterized_protein	Esi_0013_0075	Ectocarpus_siliculosus (Brown_alga) (Conferva_siliculosa)	Ribosome_biogenesis [03009]	ATP_binding [GO:0005524]	GO:0005524	GO:0005524~ATP_binding	NA	NA
gene8789	17350838	CHLNCDRAFT_141018	384.499	920.272	2.39343	1.25908	3.73766e-06	6.83935e-05	UP	Uncharacterized_protein	Esi_0119_0026	Ectocarpus_siliculosus (Brown_alga) (Conferva_siliculosa)	Ribosome_biogenesis [03009]	nucleus [GO:0005634]	GO:0005634	NA	NA	GO:0005634~nucleus
gene8363	17351284	CHLNCDRAFT_56362	1552.11	4569.2	2.94387	1.55771	2.22221e-06	4.28632e-05	UP	Uncharacterized_protein	Esi_0347_0016	Ectocarpus_siliculosus (Brown_alga) (Conferva_siliculosa)	Ribosome_biogenesis [03009]	nucleolus [GO:0005730]	GO:0005730	NA	NA	GO:0005730~nucleolus
gene8362	17351289	CHLNCDRAFT_27453	1283.66	3538.56	2.75661	1.46289	3.79732e-06	6.93534e-05	UP	Uncharacterized_protein	Esi_0062_0109	Ectocarpus_siliculosus (Brown_alga) (Conferva_siliculosa)	Ribosome_biogenesis [03009]; Protein_kinases [01001]; Ribosome_biogenesis_in_eukaryotes [03008]	ATP_binding [GO:0005524]; protein_serine/threonine_kinase_activity [GO:0004674]	GO:0004674; GO:0005524	GO:0004674~protein_serine/threonine_kinase_activity;GO:0005524~ATP_binding	NA	NA
gene438	17359252	CHLNCDRAFT_133426	512.759	1149.56	2.24192	1.16473	1.82092e-05	0.000284981	UP	Midasin	Esi_0153_0013	Ectocarpus_siliculosus (Brown_alga) (Conferva_siliculosa)	Ribosome_biogenesis [03009]; Ribosome_biogenesis_in_eukaryotes [03008]	nucleus [GO:0005634]; ATP_binding [GO:0005524]; ATPase_activity [GO:0016887]; ribosomal_large_subunit_assembly [GO:0000027]	GO:0000027; GO:0005524; GO:0005634; GO:0016887	GO:0005524~ATP_binding;GO:0016887~ATPase_activity	GO:0000027~ribosomal_large_subunit_assembly	GO:0005634~nucleus
gene439	17359253	CHLNCDRAFT_133427	190.784	461.032	2.41651	1.27292	5.17669e-06	9.20992e-05	UP	Midasin	Esi_0153_0013	Ectocarpus_siliculosus (Brown_alga) (Conferva_siliculosa)	Ribosome_biogenesis [03009]; Ribosome_biogenesis_in_eukaryotes [03008]	nucleus [GO:0005634]; ATP_binding [GO:0005524]; ATPase_activity [GO:0016887]; ribosomal_large_subunit_assembly [GO:0000027]	GO:0000027; GO:0005524; GO:0005634; GO:0016887	GO:0005524~ATP_binding;GO:0016887~ATPase_activity	GO:0000027~ribosomal_large_subunit_assembly	GO:0005634~nucleus
gene5794	17353880	CHLNCDRAFT_36029	1048.26	1773.71	1.69206	0.758779	0.00844128	0.0494148	UP	Uncharacterized_protein	Esi_0070_0009	Ectocarpus_siliculosus (Brown_alga) (Conferva_siliculosa)	Ribosome_biogenesis [03009]; Ribosome_biogenesis_in_eukaryotes [03008]	NA	NA	NA	NA	NA
gene3399	17356122	CHLNCDRAFT_21830	561.323	1121.94	1.99874	0.999091	0.000245561	0.00267065	UP	Uncharacterized_protein	Esi_0236_0008	Ectocarpus_siliculosus (Brown_alga) (Conferva_siliculosa)	Ribosome_biogenesis [03009]; Ribosome_biogenesis_in_eukaryotes [03008]; DNA_replication_proteins [03032]	snoRNA_binding [GO:0030515]; pseudouridine_synthesis [GO:0001522]; ribosome_biogenesis [GO:0042254]	GO:0001522; GO:0030515; GO:0042254	GO:0030515~snoRNA_binding	GO:0001522~pseudouridine_synthesis;GO:0042254~ribosome_biogenesis	NA
gene5716	17354070	CHLNCDRAFT_135424	190.457	488.252	2.56358	1.35816	1.6127e-06	3.29559e-05	UP	DEAD_box_helicase	Esi_0135_0024	Ectocarpus_siliculosus (Brown_alga) (Conferva_siliculosa)	Ribosome_biogenesis [03009]; Spliceosome [03041]	ATP_binding [GO:0005524]; helicase_activity [GO:0004386]; nucleic_acid_binding [GO:0003676]	GO:0003676; GO:0004386; GO:0005524	GO:0003676~nucleic_acid_binding;GO:0004386~helicase_activity;GO:0005524~ATP_binding	NA	NA
gene5305	17354456	CHLNCDRAFT_134882	311.782	528.6	1.69541	0.761638	0.00495574	0.0324483	UP	Uncharacterized_protein	Esi_0076_0077	Ectocarpus_siliculosus (Brown_alga) (Conferva_siliculosa)	Ribosome_biogenesis_in_eukaryotes [03008]; Ribosome_biogenesis [03009]	snoRNA_binding [GO:0030515]; maturation_of_SSU-rRNA_from_tricistronic_rRNA_transcript (SSU-rRNA, 5.8S_rRNA, LSU-rRNA) [GO:0000462]	GO:0000462; GO:0030515	GO:0030515~snoRNA_binding	GO:0000462~maturation_of_SSU-rRNA_from_tricistronic_rRNA_transcript (SSU-rRNA, 5.8S_rRNA, LSU-rRNA)	NA
gene8336	17351264	CHLNCDRAFT_27642	1234.85	2230.62	1.80639	0.853109	0.00441274	0.0296596	UP	Uncharacterized_protein	Esi_0189_0039	Ectocarpus_siliculosus (Brown_alga) (Conferva_siliculosa)	RNA_polymerase [03020]; Transcription_machinery [03021]	DNA_binding [GO:0003677]; DNA-directed_5'-3' RNA_polymerase_activity [GO:0003899]; protein_dimerization_activity [GO:0046983]; transcription, DNA-templated [GO:0006351]	GO:0003677; GO:0003899; GO:0006351; GO:0046983	GO:0003677~DNA_binding;GO:0003899~DNA-directed_RNA_polymerase_activity;GO:0046983~protein_dimerization_activity	GO:0006351~transcription, DNA-templated	NA
gene2131	17357431	CHLNCDRAFT_142244	460.441	805.803	1.75007	0.807409	0.00287571	0.0212851	UP	Protein_arginine_N-methyltransferase	SKB1_Esi_0006_0115	Ectocarpus_siliculosus (Brown_alga) (Conferva_siliculosa)	Spliceosome [03041]; Chromosome_and_associated_proteins [03036]; RNA_transport [03013]	methyltransferase_activity [GO:0008168]; peptidyl-arginine_N-methylation [GO:0035246]	GO:0008168; GO:0035246	GO:0008168~methyltransferase_activity	GO:0035246~peptidyl-arginine_N-methylation	NA
gene5540	17354038	CHLNCDRAFT_35907	4444.13	10815.5	2.43366	1.28313	0.000271177	0.00291955	UP	Uncharacterized_protein	Esi_0346_0011	Ectocarpus_siliculosus (Brown_alga) (Conferva_siliculosa)	Sulfur_metabolism [00920]	heme_binding [GO:0020037]; iron-sulfur_cluster_binding [GO:0051536]; oxidoreductase_activity [GO:0016491]	GO:0016491; GO:0020037; GO:0051536	GO:0016491~oxidoreductase_activity;GO:0020037~heme_binding;GO:0051536~iron-sulfur_cluster_binding	NA	NA
gene3776	17355680	CHLNCDRAFT_11906	8.97482	65.9258	7.34564	2.87689	1.44902e-06	2.99289e-05	UP	Uncharacterized_protein	Esi_0212_0014	Ectocarpus_siliculosus (Brown_alga) (Conferva_siliculosa)	Transcription_factors [03000]	nucleus [GO:0005634]; DNA_binding [GO:0003677]	GO:0003677; GO:0005634	GO:0003677~DNA_binding	NA	GO:0005634~nucleus
gene4457	17354907	CHLNCDRAFT_133757	1321.19	3116.75	2.35905	1.23821	6.99721e-05	0.000915057	UP	Presumed_helicase_required_for_RNA_polymerase_II_transcription_termination_and_processing_of_RNAs	Esi_0368_0005	Ectocarpus_siliculosus (Brown_alga) (Conferva_siliculosa)	Transcription_machinery [03021]	helicase_activity [GO:0004386]	GO:0004386	GO:0004386~helicase_activity	NA	NA
gene1114	17358740	CHLNCDRAFT_138110	472.736	787.501	1.66584	0.736248	0.00574743	0.0364901	UP	Uncharacterized_protein (Fragment)	Esi_0182_0049	Ectocarpus_siliculosus (Brown_alga) (Conferva_siliculosa)	Transcription_machinery [03021]; RNA_polymerase [03020]	nucleus [GO:0005634]; DNA_binding [GO:0003677]; DNA-directed_5'-3' RNA_polymerase_activity [GO:0003899]; ribonucleoside_binding [GO:0032549]; transcription, DNA-templated [GO:0006351]	GO:0003677; GO:0003899; GO:0005634; GO:0006351; GO:0032549	GO:0003677~DNA_binding;GO:0003899~DNA-directed_RNA_polymerase_activity;GO:0032549~ribonucleoside_binding	GO:0006351~transcription, DNA-templated	GO:0005634~nucleus
gene1113	17358737	CHLNCDRAFT_19065	112.871	220.1	1.95002	0.96349	0.00392218	0.0271005	UP	Uncharacterized_protein (Fragment)	Esi_0182_0049	Ectocarpus_siliculosus (Brown_alga) (Conferva_siliculosa)	Transcription_machinery [03021]; RNA_polymerase [03020]	nucleus [GO:0005634]; DNA_binding [GO:0003677]; DNA-directed_5'-3' RNA_polymerase_activity [GO:0003899]; ribonucleoside_binding [GO:0032549]; transcription, DNA-templated [GO:0006351]	GO:0003677; GO:0003899; GO:0005634; GO:0006351; GO:0032549	GO:0003677~DNA_binding;GO:0003899~DNA-directed_RNA_polymerase_activity;GO:0032549~ribonucleoside_binding	GO:0006351~transcription, DNA-templated	GO:0005634~nucleus
gene837	17358678	CHLNCDRAFT_29505	591.197	1348.82	2.28151	1.18999	1.67189e-05	0.000264236	UP	tRNA (guanine(26)-N(2))-dimethyltransferase (EC_2.1.1.216)	Esi_0019_0061	Ectocarpus_siliculosus (Brown_alga) (Conferva_siliculosa)	Transfer_RNA_biogenesis [03016]	tRNA (guanine-N2-)-methyltransferase_activity [GO:0004809]; tRNA_binding [GO:0000049]	GO:0000049; GO:0004809	GO:0000049~tRNA_binding;GO:0004809~tRNA (guanine-N2-)-methyltransferase_activity	NA	NA
gene1436	17358067	CHLNCDRAFT_140504	258.123	647.83	2.50977	1.32755	1.42652e-06	2.95274e-05	UP	tRNA-dihydrouridine(47) synthase [NAD(P)(+)] (EC_1.3.1.-) (tRNA-dihydrouridine_synthase_3)	Esi_0294_0020	Ectocarpus_siliculosus (Brown_alga) (Conferva_siliculosa)	Transfer_RNA_biogenesis [03016]	flavin_adenine_dinucleotide_binding [GO:0050660]; metal_ion_binding [GO:0046872]; tRNA_dihydrouridine_synthase_activity [GO:0017150]	GO:0017150; GO:0046872; GO:0050660	GO:0017150~tRNA_dihydrouridine_synthase_activity;GO:0046872~metal_ion_binding;GO:0050660~flavin_adenine_dinucleotide_binding	NA	NA
gene156	17359424	CHLNCDRAFT_133064	215.164	392.059	1.82214	0.865631	0.00227833	0.0174516	UP	Peptide_chain_release_factor	Esi_0136_0056	Ectocarpus_siliculosus (Brown_alga) (Conferva_siliculosa)	Translation_factors [03012]	cytoplasm [GO:0005737]; translation_release_factor_activity, codon_specific [GO:0016149]	GO:0005737; GO:0016149	GO:0016149~translation_release_factor_activity, codon_specific	NA	GO:0005737~cytoplasm
gene8326	17351250	CHLNCDRAFT_27595	528.576	871.675	1.6491	0.72168	0.0069649	0.0424555	UP	N/a	Esi_0019_0103	Ectocarpus_siliculosus (Brown_alga) (Conferva_siliculosa)	Transporters [02000]	integral_component_of_membrane [GO:0016021]; calcium_ion_binding [GO:0005509]; transmembrane_transporter_activity [GO:0022857]	GO:0005509; GO:0016021; GO:0022857	GO:0005509~calcium_ion_binding;GO:0022857~transmembrane_transporter_activity	NA	GO:0016021~integral_component_of_membrane
gene595	17359216	CHLNCDRAFT_133646	9.63485	95.3454	9.89588	3.30683	2.5004e-09	9.15069e-08	UP	Proline/betaine_transporter	phytr_3150	Candidatus_Phycorickettsia_trachydisci	Transporters [02000]	integral_component_of_membrane [GO:0016021]; transmembrane_transport [GO:0055085]	GO:0016021; GO:0055085	NA	GO:0055085~transmembrane_transport	GO:0016021~integral_component_of_membrane
gene1357	17357827	CHLNCDRAFT_34049	66.2456	220.177	3.32364	1.73276	1.69858e-06	3.42744e-05	UP	Putative_sulfate_transporter_of_the_SLC26A11_family	AtSym-01	Acropora_tenuis (Purple_tipped_acropora)	Transporters [02000]	integral_component_of_membrane [GO:0016021]; secondary_active_sulfate_transmembrane_transporter_activity [GO:0008271]	GO:0008271; GO:0016021	GO:0008271~secondary_active_sulfate_transmembrane_transporter_activity	NA	GO:0016021~integral_component_of_membrane
gene4570	17354877	CHLNCDRAFT_133898	186.694	1638.27	8.77516	3.13343	3.39863e-26	9.0866e-24	UP	Putative_sulfate_transporter_of_the_SLC26A11_family	AtSym-01	Acropora_tenuis (Purple_tipped_acropora)	Transporters [02000]	integral_component_of_membrane [GO:0016021]; secondary_active_sulfate_transmembrane_transporter_activity [GO:0008271]	GO:0008271; GO:0016021	GO:0008271~secondary_active_sulfate_transmembrane_transporter_activity	NA	GO:0016021~integral_component_of_membrane
gene2098	17357408	CHLNCDRAFT_34403	585.051	998.425	1.70656	0.771092	0.00418766	0.0285253	UP	Sugar-phosphate:phosphate_translocator, DMT_family (Triosephosphate/phosphate_translocator)	Gasu_21660_Gs21660.1	Galdieria_sulphuraria (Red_alga)	Transporters [02000]	integral_component_of_membrane [GO:0016021]	GO:0016021	NA	NA	GO:0016021~integral_component_of_membrane
gene9467	17350157	CHLNCDRAFT_142571	346.103	1619.04	4.67792	2.22587	7.41859e-15	6.49126e-13	UP	ATP-binding_cassette_superfamily	Esi_0049_0023	Ectocarpus_siliculosus (Brown_alga) (Conferva_siliculosa)	Transporters [02000]; Exosome [04147]; ABC_transporters [02010]; CD_molecules [04090]	integral_component_of_membrane [GO:0016021]; ATP_binding [GO:0005524]; ATPase_activity [GO:0016887]	GO:0005524; GO:0016021; GO:0016887	GO:0005524~ATP_binding;GO:0016887~ATPase_activity	NA	GO:0016021~integral_component_of_membrane
gene6019	17353766	CHLNCDRAFT_135819	354.936	738.999	2.08206	1.05801	8.33801e-05	0.00106155	UP	Uncharacterized_protein	Esi_0253_0002	Ectocarpus_siliculosus (Brown_alga) (Conferva_siliculosa)	Ubiquitin_system [04121]	NA	NA	NA	NA	NA

## Sheet: Downregulated genes in LOG OX1
Table S2-List of genes downregulated in LOG OX1 versus WT (1.5-fold change, adjusted p-value (q-values) ≤0.05)
Gene_ID	Gene_ID	Name	CC Expression	CT Expression	FoldChange	log2FoldChange	P Value	Adjusted P Value	Regulation	Protein_name (Uniprot database algae reviewed)	Gene_Symbol	Organism_name	Pathway	Gene_Ontology	Gene_Ontology_IDs	GO_MF	GO_BP	GO_CC
gene4806	17354552	CHLNCDRAFT_57929	1886.59	274.757	0.145637	-2.77955	8.70031e-21	1.49537e-18	DOWN	Nicotinanamine_aminotransferase_A	OsNAAT1_Esi_0008_0209	Ectocarpus_siliculosus (Brown_alga) (Conferva_siliculosa)	Alanine, aspartate_and_glutamate_metabolism [00250]; Amino_acid_related_enzymes [01007]; Arginine_biosynthesis [00220]; Carbon_fixation_in_photosynthetic_organisms [00710]; Glycine, serine_and_threonine_metabolism [00260]; Glyoxylate_and_dicarboxylate_metabolism [00630]	pyridoxal_phosphate_binding [GO:0030170]; transaminase_activity [GO:0008483]; biosynthetic_process [GO:0009058]	GO:0008483; GO:0009058; GO:0030170	GO:0008483~transaminase_activity;GO:0030170~pyridoxal_phosphate_binding	GO:0009058~biosynthetic_process	NA
gene3786	17355733	CHLNCDRAFT_144780	1862.21	1073.29	0.576352	-0.794977	0.00592891	0.0373957	DOWN	Uncharacterized_protein	Esi_0430_0005	Ectocarpus_siliculosus (Brown_alga) (Conferva_siliculosa)	Amino_sugar_and_nucleotide_sugar_metabolism [00520]; Pentose_and_glucuronate_interconversions [00040]; Starch_and_sucrose_metabolism [00500]; Galactose_metabolism [00052]	intramolecular_transferase_activity, phosphotransferases [GO:0016868]; UTP:glucose-1-phosphate_uridylyltransferase_activity [GO:0003983]; carbohydrate_metabolic_process [GO:0005975]; UDP-glucose_metabolic_process [GO:0006011]	GO:0003983; GO:0005975; GO:0006011; GO:0016868	GO:0003983~UTP:glucose-1-phosphate_uridylyltransferase_activity;GO:0016868~intramolecular_transferase_activity, phosphotransferases	GO:0005975~carbohydrate_metabolic_process;GO:0006011~UDP-glucose_metabolic_process	NA
gene158	17359493	CHLNCDRAFT_133066	769.423	375.043	0.487435	-1.03672	0.000135812	0.00160323	DOWN	Agmatine_deiminase (EC_3.5.3.12)	Esi_0055_0036	Ectocarpus_siliculosus (Brown_alga) (Conferva_siliculosa)	Arginine_and_proline_metabolism [00330]	agmatine_deiminase_activity [GO:0047632]; protein-arginine_deiminase_activity [GO:0004668]; putrescine_biosynthetic_process [GO:0009446]	GO:0004668; GO:0009446; GO:0047632	GO:0004668~protein-arginine_deiminase_activity;GO:0047632~agmatine_deiminase_activity	GO:0009446~putrescine_biosynthetic_process	NA
gene157	17359425	CHLNCDRAFT_18182	754.317	455.032	0.603237	-0.729203	0.00691501	0.0422048	DOWN	N-carbamoylputrescine_amidase (EC_3.5.1.53)	CPA_Esi_0030_0077	Ectocarpus_siliculosus (Brown_alga) (Conferva_siliculosa)	Arginine_and_proline_metabolism [00330]	N-carbamoylputrescine_amidase_activity [GO:0050126]; nitrogen_compound_metabolic_process [GO:0006807]	GO:0006807; GO:0050126	GO:0050126~N-carbamoylputrescine_amidase_activity	GO:0006807~nitrogen_compound_metabolic_process	NA
gene465	17359523	GLYD1	4823.22	2393.53	0.496252	-1.01086	0.00236211	0.0179868	DOWN	Putative_D-lactate_dehydrogenase, Fe-S_protein, FAD/FMN-containing	REIFOR_02399	Reinekea_forsetii	Carbohydrate_metabolism[99981]	FAD_binding [GO:0071949]; iron-sulfur_cluster_binding [GO:0051536]; oxidoreductase_activity [GO:0016491]	GO:0016491; GO:0051536; GO:0071949	GO:0016491~oxidoreductase_activity;GO:0051536~iron-sulfur_cluster_binding;GO:0071949~FAD_binding	NA	NA
gene8282	17351386	CHLNCDRAFT_27270	277.263	127.653	0.460405	-1.11903	0.000452346	0.00452836	DOWN	Lissencephaly_protein_1-like	Esi_0072_0103	Ectocarpus_siliculosus (Brown_alga) (Conferva_siliculosa)	Chromosome_and_associated_proteins [03036]	NA	NA	NA	NA	NA
gene2702	17357192	CHLNCDRAFT_21253	498.694	300.865	0.603307	-0.729036	0.0070685	0.0430053	DOWN	Jumonji_domain-containing_protein	NA	Yamagishiella_unicocca	Chromosome_and_associated_proteins [03036]	nucleus [GO:0005634]; DNA_binding [GO:0003677]	GO:0003677; GO:0005634	GO:0003677~DNA_binding	NA	GO:0005634~nucleus
gene4922	17354788	CHLNCDRAFT_48847	31.9964	2.8073	0.0877378	-3.51066	1.07995e-05	0.000177989	DOWN	Histone_H3 (Fragment)	NA	Cladophora_coelothrix	Chromosome_and_associated_proteins [03036]; Exosome [04147]	nucleosome [GO:0000786]; nucleus [GO:0005634]; DNA_binding [GO:0003677]; protein_heterodimerization_activity [GO:0046982]	GO:0000786; GO:0003677; GO:0005634; GO:0046982	GO:0003677~DNA_binding;GO:0046982~protein_heterodimerization_activity	NA	GO:0000786~nucleosome;GO:0005634~nucleus
gene4281	17355522	CHLNCDRAFT_145435	10119.3	5281.04	0.521879	-0.938212	0.00783986	0.0465998	DOWN	Cysteine_synthase (EC_2.5.1.47)	REIFOR_00308	Reinekea_forsetii	Cysteine_and_methionine_metabolism [00270]; Sulfur_metabolism [00920]	cysteine_synthase_activity [GO:0004124]; cysteine_biosynthetic_process_from_serine [GO:0006535]	GO:0004124; GO:0006535	GO:0004124~cysteine_synthase_activity	GO:0006535~cysteine_biosynthetic_process_from_serine	NA
gene6425	17353089	CHLNCDRAFT_36318	727.442	410.563	0.564393	-0.825228	0.00209013	0.0161976	DOWN	Putative_AAA_family_ATP_ase	Esi_0243_0029	Ectocarpus_siliculosus (Brown_alga) (Conferva_siliculosa)	Cytoskeleton_proteins [04812]	ATP_binding [GO:0005524]	GO:0005524	GO:0005524~ATP_binding	NA	NA
gene9577	17350046	CHLNCDRAFT_28927	2838.39	1516.92	0.534428	-0.903932	0.00354533	0.0249991	DOWN	Kinesin (Subfamily)	Esi_0027_0071	Ectocarpus_siliculosus (Brown_alga) (Conferva_siliculosa)	Cytoskeleton_proteins [04812]	ATP_binding [GO:0005524]; microtubule_binding [GO:0008017]; microtubule_motor_activity [GO:0003777]; microtubule-based_movement [GO:0007018]	GO:0003777; GO:0005524; GO:0007018; GO:0008017	GO:0003777~microtubule_motor_activity;GO:0005524~ATP_binding;GO:0008017~microtubule_binding	GO:0007018~microtubule-based_movement	NA
gene4411	17355266	CHLNCDRAFT_10674	71.1681	27.0499	0.380084	-1.39561	0.00593389	0.0374026	DOWN	Katanin_p60_ATPase-containing_subunit_A1 (Katanin_p60_subunit_A1) (EC_5.6.1.1) (p60_katanin)	KATNA1_Esi_0007_0029	Ectocarpus_siliculosus (Brown_alga) (Conferva_siliculosa)	Cytoskeleton_proteins [04812]	cytoplasm [GO:0005737]; microtubule [GO:0005874]; ATP_binding [GO:0005524]; isomerase_activity [GO:0016853]; microtubule_binding [GO:0008017]; microtubule-severing_ATPase_activity [GO:0008568]	GO:0005524; GO:0005737; GO:0005874; GO:0008017; GO:0008568; GO:0016853	GO:0005524~ATP_binding;GO:0008017~microtubule_binding;GO:0008568~microtubule-severing_ATPase_activity;GO:0016853~isomerase_activity	NA	GO:0005737~cytoplasm;GO:0005874~microtubule
gene2152	17357735	CHLNCDRAFT_20468	196.096	70.2626	0.358308	-1.48073	7.86186e-05	0.0010076	DOWN	Dynein_heavy_chain	DYHC9_Esi_0160_0009	Ectocarpus_siliculosus (Brown_alga) (Conferva_siliculosa)	Cytoskeleton_proteins [04812]	dynein_complex [GO:0030286]; ATP_binding [GO:0005524]; microtubule_motor_activity [GO:0003777]; microtubule-based_movement [GO:0007018]	GO:0003777; GO:0005524; GO:0007018; GO:0030286	GO:0003777~microtubule_motor_activity;GO:0005524~ATP_binding	GO:0007018~microtubule-based_movement	GO:0030286~dynein_complex
gene4714	17355138	CHLNCDRAFT_52395	101.269	35.5092	0.350643	-1.51192	0.00127136	0.0106038	DOWN	Hypothetical_leucine_rich_repeat_protein	Esi_0244_0024	Ectocarpus_siliculosus (Brown_alga) (Conferva_siliculosa)	Cytoskeleton_proteins [04812]	NA	NA	NA	NA	NA
gene4987	17354580	CHLNCDRAFT_52598	1935.36	1069.64	0.55268	-0.855483	0.00336033	0.0240113	DOWN	ATP_binding / ATP-dependent_helicase/ DNA_binding / DNA-directed_DNA_polymerase/ helicase/ nucleic_a	Esi_0400_0014	Ectocarpus_siliculosus (Brown_alga) (Conferva_siliculosa)	DNA_repair_and_recombination_proteins [03400]	ATP_binding [GO:0005524]; DNA-directed_DNA_polymerase_activity [GO:0003887]; nucleic_acid_binding [GO:0003676]; DNA-dependent_DNA_replication [GO:0006261]	GO:0003676; GO:0003887; GO:0005524; GO:0006261	GO:0003676~nucleic_acid_binding;GO:0003887~DNA-directed_DNA_polymerase_activity;GO:0005524~ATP_binding	GO:0006261~DNA-dependent_DNA_replication	NA
gene7855	17351661	CHLNCDRAFT_139037	9278.04	4519.55	0.487123	-1.03764	0.00300952	0.0220446	DOWN	DNA_primase (EC_2.7.7.-)	Esi_0086_0039	Ectocarpus_siliculosus (Brown_alga) (Conferva_siliculosa)	DNA_replication [03030]; DNA_replication_proteins [03032]	DNA_primase_activity [GO:0003896]	GO:0003896	GO:0003896~DNA_primase_activity	NA	NA
gene4830	17354662	CHLNCDRAFT_134244	1839.51	824.632	0.448289	-1.1575	6.03172e-05	0.000800763	DOWN	Putative_katanin_like_protein	Esi_0021_0146	Ectocarpus_siliculosus (Brown_alga) (Conferva_siliculosa)	Endocytosis [04144]; Membrane_trafficking [04131]	ATP_binding [GO:0005524]	GO:0005524	GO:0005524~ATP_binding	NA	NA
gene2766	17356946	CHLNCDRAFT_21084	475.296	242.518	0.510246	-0.970735	0.000472255	0.00469571	DOWN	Uncharacterized_protein	Esi_0000_0630	Ectocarpus_siliculosus (Brown_alga) (Conferva_siliculosa)	Endocytosis [04144]; Membrane_trafficking [04131]	GTPase_activator_activity [GO:0005096]; metal_ion_binding [GO:0046872]	GO:0005096; GO:0046872	GO:0005096~GTPase_activator_activity;GO:0046872~metal_ion_binding	NA	NA
gene4283	17355523	CHLNCDRAFT_22879	1315.35	732.543	0.556918	-0.844464	0.00225677	0.0173217	DOWN	Uncharacterized_protein	Esi_0134_0072	Ectocarpus_siliculosus (Brown_alga) (Conferva_siliculosa)	Endocytosis [04144]; Membrane_trafficking [04131]	vesicle_docking_involved_in_exocytosis [GO:0006904]	GO:0006904	NA	GO:0006904~vesicle_docking_involved_in_exocytosis	NA
gene2723	17356929	CHLNCDRAFT_6358	3567.21	1321.54	0.370468	-1.43258	6.8949e-06	0.000118931	DOWN	Uncharacterized_protein	Esi_0054_0026	Ectocarpus_siliculosus (Brown_alga) (Conferva_siliculosa)	Enzymes_with_EC_numbers[99980]	integral_component_of_membrane [GO:0016021]; ATP_binding [GO:0005524]	GO:0005524; GO:0016021	GO:0005524~ATP_binding	NA	GO:0016021~integral_component_of_membrane
gene9276	17350349	CHLNCDRAFT_59377	1874.7	581.372	0.310115	-1.68913	6.6803e-09	2.25607e-07	DOWN	Calcium-transporting_ATPase (EC_7.2.2.10)	Esi_0145_0068	Ectocarpus_siliculosus (Brown_alga) (Conferva_siliculosa)	Enzymes_with_EC_numbers[99980]	integral_component_of_membrane [GO:0016021]; ATP_binding [GO:0005524]; calcium-transporting_ATPase_activity [GO:0005388]	GO:0005388; GO:0005524; GO:0016021	GO:0005388~calcium-transporting_ATPase_activity;GO:0005524~ATP_binding	NA	GO:0016021~integral_component_of_membrane
gene7359	17352186	CHLNCDRAFT_138368	523.776	266.23	0.508289	-0.976279	0.000388789	0.00398298	DOWN	Uncharacterized_protein	Esi_0053_0047	Ectocarpus_siliculosus (Brown_alga) (Conferva_siliculosa)	Enzymes_with_EC_numbers[99980]	metal_ion_binding [GO:0046872]; oxidoreductase_activity, acting_on_single_donors_with_incorporation_of_molecular_oxygen, incorporation_of_two_atoms_of_oxygen [GO:0016702]	GO:0016702; GO:0046872	GO:0016702~oxidoreductase_activity, acting_on_single_donors_with_incorporation_of_molecular_oxygen, incorporation_of_two_atoms_of_oxygen;GO:0046872~metal_ion_binding	NA	NA
gene2755	17356971	CHLNCDRAFT_30464	1173.78	498.198	0.424438	-1.23637	5.82571e-06	0.000102322	DOWN	Uncharacterized_protein	Esi_0007_0176	Ectocarpus_siliculosus (Brown_alga) (Conferva_siliculosa)	Exosome [04147]; Endocytosis [04144]; Membrane_trafficking [04131]	vacuolar_transport [GO:0007034]	GO:0007034	NA	GO:0007034~vacuolar_transport	NA
gene905	17358962	CHLNCDRAFT_137864	829.904	498.685	0.600895	-0.734814	0.00658764	0.0405409	DOWN	Uncharacterized_protein	Esi_0330_0004	Ectocarpus_siliculosus (Brown_alga) (Conferva_siliculosa)	Folate_biosynthesis [00790]	integral_component_of_membrane [GO:0016021]	GO:0016021	NA	NA	GO:0016021~integral_component_of_membrane
gene5294	17354310	CHLNCDRAFT_48894	460.861	262.676	0.569968	-0.811048	0.00324569	0.0232611	DOWN	Uncharacterized_protein	BN1012_Phect3236	Candidatus_Phaeomarinobacter_ectocarpi	Function_unknown[99997]	NA	NA	NA	NA	NA
gene4813	17354584	CHLNCDRAFT_134221	543.076	266.309	0.490373	-1.02805	0.00017628	0.00201508	DOWN	Hypothetical_conserved_protein	Esi_0007_0081	Ectocarpus_siliculosus (Brown_alga) (Conferva_siliculosa)	Function_unknown[99997]	NA	NA	NA	NA	NA
gene909	17358610	CHLNCDRAFT_19036	8294.35	4160.13	0.501562	-0.9955	0.00413217	0.0282507	DOWN	L-ascorbate_peroxidase (EC_1.11.1.11)	APX_Esi_0438_0006	Ectocarpus_siliculosus (Brown_alga) (Conferva_siliculosa)	Glutathione_metabolism [00480]; Ascorbate_and_aldarate_metabolism [00053]	heme_binding [GO:0020037]; L-ascorbate_peroxidase_activity [GO:0016688]; response_to_oxidative_stress [GO:0006979]	GO:0006979; GO:0016688; GO:0020037	GO:0016688~L-ascorbate_peroxidase_activity;GO:0020037~heme_binding	GO:0006979~response_to_oxidative_stress	NA
gene5126	17354347	CHLNCDRAFT_31413	1203.35	573.599	0.476667	-1.06895	9.22004e-05	0.00116156	DOWN	Digalactosyldiacylglycerol_synthase, family_GT4 (EC_2.4.1.241)	DGDG_Esi_0176_0014	Ectocarpus_siliculosus (Brown_alga) (Conferva_siliculosa)	Glycerolipid_metabolism [00561]; Glycosyltransferases [01003]	digalactosyldiacylglycerol_synthase_activity [GO:0046481]	GO:0046481	GO:0046481~digalactosyldiacylglycerol_synthase_activity	NA	NA
gene1015	17358548	CHLNCDRAFT_19399	227.048	107.407	0.473058	-1.07991	0.00136362	0.0113047	DOWN	Aminotransferase	A9C19_17095	Bacillus_weihaiensis	Glycerophospholipid_metabolism [00564]	pyridoxal_phosphate_binding [GO:0030170]; transaminase_activity [GO:0008483]	GO:0008483; GO:0030170	GO:0008483~transaminase_activity;GO:0030170~pyridoxal_phosphate_binding	NA	NA
gene2049	17357364	CHLNCDRAFT_16305	1107.81	469.667	0.423959	-1.238	6.51723e-06	0.000113228	DOWN	Glycine_dehydrogenase (aminomethyl-transferring) (EC_1.4.4.2)	KLA_00765	Cellulophaga_geojensis_KL-A	Glycine, serine_and_threonine_metabolism [00260]; Glyoxylate_and_dicarboxylate_metabolism [00630]	glycine_dehydrogenase (decarboxylating) activity [GO:0004375]; glycine_catabolic_process [GO:0006546]	GO:0004375; GO:0006546	GO:0004375~glycine_dehydrogenase (decarboxylating) activity	GO:0006546~glycine_catabolic_process	NA
gene2050	17357365	CHLNCDRAFT_34381	864.016	446.853	0.517182	-0.951256	0.000420254	0.00424889	DOWN	Glycine_dehydrogenase (decarboxylating) (EC_1.4.4.2) (Glycine_cleavage_system_P-protein) (Glycine_decarboxylase) (Glycine_dehydrogenase (aminomethyl-transferring))	gcvP_LX95_00023	Mesonia_algae	Glycine, serine_and_threonine_metabolism [00260]; Glyoxylate_and_dicarboxylate_metabolism [00630]	glycine_dehydrogenase (decarboxylating) activity [GO:0004375]; glycine_decarboxylation_via_glycine_cleavage_system [GO:0019464]	GO:0004375; GO:0019464	GO:0004375~glycine_dehydrogenase (decarboxylating) activity	GO:0019464~glycine_decarboxylation_via_glycine_cleavage_system	NA
gene9699	17349923	CHLNCDRAFT_29050	463.251	216.299	0.466916	-1.09877	8.61356e-05	0.0010923	DOWN	Glycine_dehydrogenase (decarboxylating) (EC_1.4.4.2) (Glycine_cleavage_system_P-protein) (Glycine_decarboxylase) (Glycine_dehydrogenase (aminomethyl-transferring))	gcvP_LX95_00023	Mesonia_algae	Glycine, serine_and_threonine_metabolism [00260]; Glyoxylate_and_dicarboxylate_metabolism [00630]	glycine_dehydrogenase (decarboxylating) activity [GO:0004375]; glycine_decarboxylation_via_glycine_cleavage_system [GO:0019464]	GO:0004375; GO:0019464	GO:0004375~glycine_dehydrogenase (decarboxylating) activity	GO:0019464~glycine_decarboxylation_via_glycine_cleavage_system	NA
gene514	17359472	CHLNCDRAFT_18415	952.182	349.874	0.367444	-1.4444	1.16229e-07	3.03173e-06	DOWN	Amine_oxidase (EC_1.4.3.-)	Esi_0076_0061	Ectocarpus_siliculosus (Brown_alga) (Conferva_siliculosa)	Glycine, serine_and_threonine_metabolism [00260]; Tropane, piperidine_and_pyridine_alkaloid_biosynthesis [00960]; Tyrosine_metabolism [00350]; Isoquinoline_alkaloid_biosynthesis [00950]; Phenylalanine_metabolism [00360]; beta-Alanine_metabolism [00410]	copper_ion_binding [GO:0005507]; primary_amine_oxidase_activity [GO:0008131]; quinone_binding [GO:0048038]; amine_metabolic_process [GO:0009308]	GO:0005507; GO:0008131; GO:0009308; GO:0048038	GO:0005507~copper_ion_binding;GO:0008131~primary_amine_oxidase_activity;GO:0048038~quinone_binding	GO:0009308~amine_metabolic_process	NA
gene9551	17350071	CHLNCDRAFT_37743	583.905	183.587	0.314412	-1.66927	2.89131e-09	1.0462e-07	DOWN	NADP-dependent_glyceraldehyde-3-phosphate_dehydrogenase (EC_1.2.1.9) (Glyceraldehyde-3-phosphate_dehydrogenase [NADP(+)]) (GAPDHN) (Non-phosphorylating_glyceraldehyde_3-phosphate_dehydrogenase) (Triosephosphate_dehydrogenase) (Fragment)	GapN	Coelastrella_vacuolata (Green_alga) (Chlorella_fusca_var. vacuolata)	Glycolysis / Gluconeogenesis [00010]; Pentose_phosphate_pathway [00030]	cytoplasm [GO:0005737]; glyceraldehyde-3-phosphate_dehydrogenase (NADP+) (non-phosphorylating) activity [GO:0008886]	GO:0005737; GO:0008886	GO:0008886~glyceraldehyde-3-phosphate_dehydrogenase (NADP+) (non-phosphorylating) activity	NA	GO:0005737~cytoplasm
gene1000	17358877	CHLNCDRAFT_55979	2273.87	1169.44	0.514293	-0.959336	0.00138019	0.0113736	DOWN	Inositol-3-phosphate_synthase (EC_5.5.1.4)	IPS_Esi_0059_0137	Ectocarpus_siliculosus (Brown_alga) (Conferva_siliculosa)	Inositol_phosphate_metabolism [00562]	inositol-3-phosphate_synthase_activity [GO:0004512]; inositol_biosynthetic_process [GO:0006021]; phospholipid_biosynthetic_process [GO:0008654]	GO:0004512; GO:0006021; GO:0008654	GO:0004512~inositol-3-phosphate_synthase_activity	GO:0006021~inositol_biosynthetic_process;GO:0008654~phospholipid_biosynthetic_process	NA
gene935	17358870	CHLNCDRAFT_18787	1522.46	824.98	0.541873	-0.883975	0.0018902	0.0148249	DOWN	Phosphatidylinositol_phosphatase	Esi_0007_0170	Ectocarpus_siliculosus (Brown_alga) (Conferva_siliculosa)	Inositol_phosphate_metabolism [00562]	phosphoric_ester_hydrolase_activity [GO:0042578]	GO:0042578	GO:0042578~phosphoric_ester_hydrolase_activity	NA	NA
gene9465	17350154	CHLNCDRAFT_33387	833.292	504.1	0.60495	-0.725113	0.0078433	0.0465998	DOWN	Omega-3_fatty_acid_desaturase	NA	Chlamydomonas_sp. ICE-L	Lipid_biosynthesis_proteins [01004]	integral_component_of_membrane [GO:0016021]; oxidoreductase_activity, acting_on_paired_donors, with_oxidation_of_a_pair_of_donors_resulting_in_the_reduction_of_molecular_oxygen_to_two_molecules_of_water [GO:0016717]; lipid_metabolic_process [GO:0006629]	GO:0006629; GO:0016021; GO:0016717	GO:0016717~oxidoreductase_activity, acting_on_paired_donors, with_oxidation_of_a_pair_of_donors_resulting_in_the_reduction_of_molecular_oxygen_to_two_molecules_of_water	GO:0006629~lipid_metabolic_process	GO:0016021~integral_component_of_membrane
gene4562	17355099	CHLNCDRAFT_48812	1270.63	719.891	0.566561	-0.819698	0.00307402	0.0223808	DOWN	Fatty_acid_desaturase	Esi_0207_0012	Ectocarpus_siliculosus (Brown_alga) (Conferva_siliculosa)	Lipid_biosynthesis_proteins [01004]; Biosynthesis_of_unsaturated_fatty_acids [01040]	integral_component_of_membrane [GO:0016021]; lipid_metabolic_process [GO:0006629]	GO:0006629; GO:0016021	NA	GO:0006629~lipid_metabolic_process	GO:0016021~integral_component_of_membrane
gene6979	17352690	CHLNCDRAFT_59740	12970.2	1430.17	0.110266	-3.18094	3.7418e-17	4.0466e-15	DOWN	3-oxoacyl-[acyl-carrier-protein] synthase	KAS_Esi_0036_0077	Ectocarpus_siliculosus (Brown_alga) (Conferva_siliculosa)	Lipid_biosynthesis_proteins [01004]; Biotin_metabolism [00780]; Fatty_acid_biosynthesis [00061]	transferase_activity, transferring_acyl_groups_other_than_amino-acyl_groups [GO:0016747]; fatty_acid_biosynthetic_process [GO:0006633]	GO:0006633; GO:0016747	GO:0016747~transferase_activity, transferring_acyl_groups_other_than_amino-acyl_groups	GO:0006633~fatty_acid_biosynthetic_process	NA
gene370	17359338	CHLNCDRAFT_49546	4464.16	1702.63	0.3814	-1.39062	2.29993e-05	0.000348611	DOWN	Uncharacterized_protein	Esi_0009_0142	Ectocarpus_siliculosus (Brown_alga) (Conferva_siliculosa)	MAPK_signaling_pathway - plant [04016]	integral_component_of_membrane [GO:0016021]; ATP_binding [GO:0005524]; cation-transporting_ATPase_activity [GO:0019829]; copper_ion_binding [GO:0005507]; metal_ion_transport [GO:0030001]	GO:0005507; GO:0005524; GO:0016021; GO:0019829; GO:0030001	GO:0005507~copper_ion_binding;GO:0005524~ATP_binding;GO:0019829~cation-transporting_ATPase_activity	GO:0030001~metal_ion_transport	GO:0016021~integral_component_of_membrane
gene2281	17357496	CHLNCDRAFT_6585	1029.15	433.026	0.420759	-1.24893	4.48805e-06	8.07429e-05	DOWN	Heavy_metal_translocating_P-type_ATPase	EEY24_10505	Shewanella_algae	MAPK_signaling_pathway - plant [04016]	integral_component_of_membrane [GO:0016021]; plasma_membrane [GO:0005886]; ATP_binding [GO:0005524]; metal_ion_binding [GO:0046872]	GO:0005524; GO:0005886; GO:0016021; GO:0046872	GO:0005524~ATP_binding;GO:0046872~metal_ion_binding	NA	GO:0005886~plasma_membrane;GO:0016021~integral_component_of_membrane
gene1371	17358378	CHLNCDRAFT_48112	2257.13	1015.03	0.449699	-1.15297	0.000102647	0.00126989	DOWN	AP_complex_subunit_sigma	AP4S	Gephyrocapsa_oceanica	Membrane_trafficking [04131]	cell [GO:0005623]; membrane [GO:0016020]; intracellular_protein_transport [GO:0006886]	GO:0005623; GO:0006886; GO:0016020	NA	GO:0006886~intracellular_protein_transport	GO:0005623~cell;GO:0016020~membrane
gene4249	17355395	CHLNCDRAFT_17179	1524.4	398.306	0.261288	-1.93629	8.89061e-12	4.88983e-10	DOWN	Uncharacterized_protein	YMTp03	Yamagishiella_unicocca	Membrane_trafficking [04131]	integral_component_of_membrane [GO:0016021]	GO:0016021	NA	NA	GO:0016021~integral_component_of_membrane
gene8836	17350777	CHLNCDRAFT_28123	2781	1553.69	0.558681	-0.839903	0.00619051	0.0386656	DOWN	Uncharacterized_protein	Esi_0129_0026	Ectocarpus_siliculosus (Brown_alga) (Conferva_siliculosa)	Membrane_trafficking [04131]	integral_component_of_membrane [GO:0016021]; vesicle-mediated_transport [GO:0016192]	GO:0016021; GO:0016192	NA	GO:0016192~vesicle-mediated_transport	GO:0016021~integral_component_of_membrane
gene2692	17357007	CHLNCDRAFT_143133	3461.17	1672.47	0.48321	-1.04928	0.000992773	0.00872643	DOWN	Uncharacterized_protein	Esi_0251_0004	Ectocarpus_siliculosus (Brown_alga) (Conferva_siliculosa)	Membrane_trafficking [04131]	Rab_guanyl-nucleotide_exchange_factor_activity [GO:0017112]	GO:0017112	GO:0017112~Rab_guanyl-nucleotide_exchange_factor_activity	NA	NA
gene766	17358533	CHLNCDRAFT_19114	72.9909	24.3906	0.33416	-1.58139	0.00228084	0.0174516	DOWN	Dynein_light_chain_roadblock	DLC7a_Esi_0063_0056	Ectocarpus_siliculosus (Brown_alga) (Conferva_siliculosa)	Membrane_trafficking [04131]; Cytoskeleton_proteins [04812]	cytoplasm [GO:0005737]; cytoplasmic_dynein_complex [GO:0005868]; microtubule [GO:0005874]; motile_cilium [GO:0031514]; dynein_intermediate_chain_binding [GO:0045505]; motor_activity [GO:0003774]; microtubule-based_movement [GO:0007018]	GO:0003774; GO:0005737; GO:0005868; GO:0005874; GO:0007018; GO:0031514; GO:0045505	GO:0003774~motor_activity;GO:0045505~dynein_intermediate_chain_binding	GO:0007018~microtubule-based_movement	GO:0005737~cytoplasm;GO:0005868~cytoplasmic_dynein_complex;GO:0005874~microtubule;GO:0031514~motile_cilium
gene941	17358599	CHLNCDRAFT_33853	1071.81	377.45	0.352161	-1.50569	4.6648e-08	1.33627e-06	DOWN	RME1, RME-1/EHD_family_ATPase_with_a_C-terminal_EH_domain	RME1_Esi_0054_0063	Ectocarpus_siliculosus (Brown_alga) (Conferva_siliculosa)	Membrane_trafficking [04131]; Endocytosis [04144]; Exosome [04147]	calcium_ion_binding [GO:0005509]; GTP_binding [GO:0005525]	GO:0005509; GO:0005525	GO:0005509~calcium_ion_binding;GO:0005525~GTP_binding	NA	NA
gene511	17359436	CHLNCDRAFT_33654	2532.3	935.504	0.369429	-1.43663	1.97452e-06	3.87852e-05	DOWN	alpha-1,2-Mannosidase (EC_3.2.1.-)	MAN1A1_Esi_0168_0067	Ectocarpus_siliculosus (Brown_alga) (Conferva_siliculosa)	Membrane_trafficking [04131]; Protein_processing_in_endoplasmic_reticulum [04141]; N-Glycan_biosynthesis [00510]	integral_component_of_membrane [GO:0016021]; calcium_ion_binding [GO:0005509]; mannosyl-oligosaccharide_1,2-alpha-mannosidase_activity [GO:0004571]; metabolic_process [GO:0008152]	GO:0004571; GO:0005509; GO:0008152; GO:0016021	GO:0004571~mannosyl-oligosaccharide_1,2-alpha-mannosidase_activity;GO:0005509~calcium_ion_binding	GO:0008152~metabolic_process	GO:0016021~integral_component_of_membrane
gene1279	17358260	CHLNCDRAFT_34008	1326.47	473.863	0.357237	-1.48505	9.40625e-08	2.536e-06	DOWN	MPN/PAD-1_domain-containing_protein	Esi_0006_0030	Ectocarpus_siliculosus (Brown_alga) (Conferva_siliculosa)	Membrane_trafficking [04131]; Ubiquitin_system [04121]; Peptidases [01002]; Endocytosis [04144]	NA	NA	NA	NA	NA
gene1519	17358376	CHLNCDRAFT_19567	2212.11	1264.23	0.571503	-0.807166	0.00669079	0.0410445	DOWN	ATP-dependent_RNA_and_DNA_helicase, putative	Esi_0113_0073	Ectocarpus_siliculosus (Brown_alga) (Conferva_siliculosa)	Mitochondrial_biogenesis [03029]	helicase_activity [GO:0004386]	GO:0004386	GO:0004386~helicase_activity	NA	NA
gene2045	17357677	CHLNCDRAFT_20689	2134.59	1078.76	0.50537	-0.984588	0.000846629	0.00773866	DOWN	Iron-sulfur_cluster_assembly_protein	Esi_0446_0015	Ectocarpus_siliculosus (Brown_alga) (Conferva_siliculosa)	Mitochondrial_biogenesis [03029]	mitochondrial_matrix [GO:0005759]; 2_iron, 2_sulfur_cluster_binding [GO:0051537]; iron_ion_binding [GO:0005506]; iron-sulfur_cluster_assembly [GO:0016226]	GO:0005506; GO:0005759; GO:0016226; GO:0051537	GO:0005506~iron_ion_binding;GO:0051537~2_iron, 2_sulfur_cluster_binding	GO:0016226~iron-sulfur_cluster_assembly	GO:0005759~mitochondrial_matrix
gene4020	17355876	CHLNCDRAFT_48758	1076.91	636.109	0.59068	-0.75955	0.00529122	0.0342778	DOWN	Uncharacterized_protein	Esi_0263_0031	Ectocarpus_siliculosus (Brown_alga) (Conferva_siliculosa)	Mitochondrial_biogenesis [03029]	NA	NA	NA	NA	NA
gene6997	17352733	CHLNCDRAFT_32275	1033.31	581.538	0.56279	-0.82933	0.0020738	0.0161165	DOWN	Lon_protease_homolog (EC_3.4.21.-)	Esi_0165_0052	Ectocarpus_siliculosus (Brown_alga) (Conferva_siliculosa)	Mitochondrial_biogenesis [03029]; Peptidases [01002]	ATP_binding [GO:0005524]; ATP-dependent_peptidase_activity [GO:0004176]; serine-type_endopeptidase_activity [GO:0004252]; protein_catabolic_process [GO:0030163]	GO:0004176; GO:0004252; GO:0005524; GO:0030163	GO:0004176~ATP-dependent_peptidase_activity;GO:0004252~serine-type_endopeptidase_activity;GO:0005524~ATP_binding	GO:0030163~protein_catabolic_process	NA
gene6873	17352744	CHLNCDRAFT_25863	748.96	334.099	0.446084	-1.16461	1.93154e-05	0.000299857	DOWN	Uncharacterized_protein	Esi_0146_0023	Ectocarpus_siliculosus (Brown_alga) (Conferva_siliculosa)	Mitochondrial_biogenesis [03029]; Transfer_RNA_biogenesis [03016]	NA	NA	NA	NA	NA
gene8625	17351025	CHLNCDRAFT_140064	1235.77	539.192	0.436322	-1.19654	1.36927e-05	0.000220388	DOWN	Similarity_to_ribonuclease_D (RNase_D)	Esi_0006_0051	Ectocarpus_siliculosus (Brown_alga) (Conferva_siliculosa)	NA	3'-5' exonuclease_activity [GO:0008408]; aminoacyl-tRNA_editing_activity [GO:0002161]; nucleic_acid_binding [GO:0003676]	GO:0002161; GO:0003676; GO:0008408	GO:0002161~aminoacyl-tRNA_editing_activity;GO:0003676~nucleic_acid_binding;GO:0008408~3'-5' exonuclease_activity	NA	NA
gene9009	17350629	CHLNCDRAFT_141315	1453.53	441.751	0.303915	-1.71826	1.05583e-09	4.25205e-08	DOWN	AP-1_complex_subunit_gamma	CPC16_Esi_0167_0073	Ectocarpus_siliculosus (Brown_alga) (Conferva_siliculosa)	NA	AP-1_adaptor_complex [GO:0030121]; intracellular_protein_transport [GO:0006886]; vesicle-mediated_transport [GO:0016192]	GO:0006886; GO:0016192; GO:0030121	NA	GO:0006886~intracellular_protein_transport;GO:0016192~vesicle-mediated_transport	GO:0030121~AP-1_adaptor_complex
gene190	17359557	CHLNCDRAFT_133105	309.451	172.201	0.556472	-0.845618	0.00517994	0.0336871	DOWN	Iron-sulfur_cluster_carrier_protein	REIFOR_01438	Reinekea_forsetii	NA	ATP_binding [GO:0005524]; ATPase_activity [GO:0016887]; iron-sulfur_cluster_binding [GO:0051536]; metal_ion_binding [GO:0046872]	GO:0005524; GO:0016887; GO:0046872; GO:0051536	GO:0005524~ATP_binding;GO:0016887~ATPase_activity;GO:0046872~metal_ion_binding;GO:0051536~iron-sulfur_cluster_binding	NA	NA
gene7257	17352497	CHLNCDRAFT_32365	1151.27	689.619	0.599008	-0.739352	0.00703392	0.0428219	DOWN	White-brown-complex_ABC_transporter_family (Partial) (Fragment)	Esi_0152_0009	Ectocarpus_siliculosus (Brown_alga) (Conferva_siliculosa)	NA	ATP_binding [GO:0005524]; ATPase_activity [GO:0016887]; RNA_binding [GO:0003723]	GO:0003723; GO:0005524; GO:0016887	GO:0003723~RNA_binding;GO:0005524~ATP_binding;GO:0016887~ATPase_activity	NA	NA
gene4392	17355278	CHLNCDRAFT_145586	8070.06	3322.64	0.411724	-1.28025	0.000238712	0.00261985	DOWN	Uncharacterized_protein	Esi_0166_0017	Ectocarpus_siliculosus (Brown_alga) (Conferva_siliculosa)	NA	ATP_binding [GO:0005524]; microtubule_binding [GO:0008017]; microtubule_motor_activity [GO:0003777]; microtubule-based_movement [GO:0007018]	GO:0003777; GO:0005524; GO:0007018; GO:0008017	GO:0003777~microtubule_motor_activity;GO:0005524~ATP_binding;GO:0008017~microtubule_binding	GO:0007018~microtubule-based_movement	NA
gene8940	17350723	CHLNCDRAFT_10735	518.714	214.612	0.413739	-1.27321	4.22575e-06	7.64526e-05	DOWN	Uncharacterized_protein	PK_Esi_0037_0120	Ectocarpus_siliculosus (Brown_alga) (Conferva_siliculosa)	NA	ATP_binding [GO:0005524]; phospholipid_binding [GO:0005543]; protein_kinase_activity [GO:0004672]	GO:0004672; GO:0005524; GO:0005543	GO:0004672~protein_kinase_activity;GO:0005524~ATP_binding;GO:0005543~phospholipid_binding	NA	NA
gene7793	17351797	CHLNCDRAFT_36848	895.605	520.871	0.581586	-0.781935	0.0036661	0.0256068	DOWN	Uncharacterized_protein	Esi_0025_0116	Ectocarpus_siliculosus (Brown_alga) (Conferva_siliculosa)	NA	ATP_binding [GO:0005524]; protein_kinase_activity [GO:0004672]	GO:0004672; GO:0005524	GO:0004672~protein_kinase_activity;GO:0005524~ATP_binding	NA	NA
gene9182	17350490	CHLNCDRAFT_33257	407.781	198.638	0.48712	-1.03765	0.000288303	0.003073	DOWN	Possible_CDPK	CDPK_Esi_0052_0011	Ectocarpus_siliculosus (Brown_alga) (Conferva_siliculosa)	NA	ATP_binding [GO:0005524]; protein_kinase_activity [GO:0004672]	GO:0004672; GO:0005524	GO:0004672~protein_kinase_activity;GO:0005524~ATP_binding	NA	NA
gene7794	17351892	CHLNCDRAFT_13628	335.523	148.423	0.442364	-1.17669	8.95223e-05	0.00113078	DOWN	Uncharacterized_protein	Esi_0025_0116	Ectocarpus_siliculosus (Brown_alga) (Conferva_siliculosa)	NA	ATP_binding [GO:0005524]; protein_kinase_activity [GO:0004672]	GO:0004672; GO:0005524	GO:0004672~protein_kinase_activity;GO:0005524~ATP_binding	NA	NA
gene9431	17350214	CHLNCDRAFT_10014	500.052	131.503	0.262979	-1.92698	3.8e-11	1.925e-09	DOWN	SNF1-related_protein_kinase	Esi_0077_0007	Ectocarpus_siliculosus (Brown_alga) (Conferva_siliculosa)	NA	ATP_binding [GO:0005524]; protein_serine/threonine_kinase_activity [GO:0004674]; negative_regulation_of_apoptotic_process [GO:0043066]	GO:0004674; GO:0005524; GO:0043066	GO:0004674~protein_serine/threonine_kinase_activity;GO:0005524~ATP_binding	GO:0043066~negative_regulation_of_apoptotic_process	NA
gene2000	17357633	CHLNCDRAFT_50621	2089.78	551.042	0.263684	-1.92312	7.8325e-11	3.76939e-09	DOWN	Beta-glucosidase (EC_3.2.1.21)	A9C19_00515	Bacillus_weihaiensis	NA	beta-glucosidase_activity [GO:0008422]; scopolin_beta-glucosidase_activity [GO:0102483]; cellulose_catabolic_process [GO:0030245]	GO:0008422; GO:0030245; GO:0102483	GO:0008422~beta-glucosidase_activity	GO:0030245~cellulose_catabolic_process	NA
gene6150	17353395	CHLNCDRAFT_136008	3784.83	1048.25	0.276962	-1.85224	8.14899e-09	2.70462e-07	DOWN	Putative_arabinose-5-phosphate_isomerase	TetV_403	Tetraselmis_virus_1	NA	carbohydrate_derivative_binding [GO:0097367]; isomerase_activity [GO:0016853]; carbohydrate_derivative_metabolic_process [GO:1901135]; carbohydrate_metabolic_process [GO:0005975]	GO:0005975; GO:0016853; GO:0097367; GO:1901135	GO:0016853~isomerase_activity;GO:0097367~carbohydrate_derivative_binding	GO:0005975~carbohydrate_metabolic_process;GO:1901135~carbohydrate_derivative_metabolic_process	NA
gene8381	17351302	CHLNCDRAFT_27686	344.231	194.298	0.564441	-0.825106	0.00498543	0.0325984	DOWN	Putative_polyketide_synthase (Fragment)	NA	uncultured_marine_cyanobacterium	NA	catalytic_activity [GO:0003824]	GO:0003824	GO:0003824~catalytic_activity	NA	NA
gene8385	17351274	CHLNCDRAFT_9558	249.511	110.846	0.444252	-1.17055	0.00053939	0.00526227	DOWN	Putative_polyketide_synthase (Fragment)	NA	uncultured_marine_cyanobacterium	NA	catalytic_activity [GO:0003824]	GO:0003824	GO:0003824~catalytic_activity	NA	NA
gene4184	17355341	CHLNCDRAFT_22890	295.157	115.508	0.391343	-1.35349	2.50872e-05	0.000374944	DOWN	Putative_polyketide_synthase (Fragment)	NA	uncultured_marine_cyanobacterium	NA	catalytic_activity [GO:0003824]	GO:0003824	GO:0003824~catalytic_activity	NA	NA
gene6983	17352807	CHLNCDRAFT_36589	1884.98	728.973	0.386726	-1.37062	2.13353e-06	4.14017e-05	DOWN	38_kDa_ribosome-associated_protein	38_Esi_0012_0045	Ectocarpus_siliculosus (Brown_alga) (Conferva_siliculosa)	NA	catalytic_activity [GO:0003824]; coenzyme_binding [GO:0050662]	GO:0003824; GO:0050662	GO:0003824~catalytic_activity;GO:0050662~coenzyme_binding	NA	NA
gene9301	17350311	CHLNCDRAFT_28616	498.097	224.422	0.450559	-1.15021	3.47796e-05	0.000495931	DOWN	Glyoxalase/bleomycin_resistance_protein/dioxygenase	KLA_00215	Cellulophaga_geojensis_KL-A	NA	dioxygenase_activity [GO:0051213]	GO:0051213	GO:0051213~dioxygenase_activity	NA	NA
gene1537	17358322	CHLNCDRAFT_20098	994.507	361.47	0.363467	-1.46011	1.02301e-07	2.71253e-06	DOWN	Extradiol_ring-cleavage_dioxygenase_class_III_protein_subunit_B	REIFOR_02347	Reinekea_forsetii	NA	dioxygenase_activity [GO:0051213]; ferrous_iron_binding [GO:0008198]; oxidoreductase_activity, acting_on_single_donors_with_incorporation_of_molecular_oxygen [GO:0016701]; zinc_ion_binding [GO:0008270]; cellular_aromatic_compound_metabolic_process [GO:0006725]	GO:0006725; GO:0008198; GO:0008270; GO:0016701; GO:0051213	GO:0008198~ferrous_iron_binding;GO:0008270~zinc_ion_binding;GO:0016701~oxidoreductase_activity, acting_on_single_donors_with_incorporation_of_molecular_oxygen;GO:0051213~dioxygenase_activity	GO:0006725~cellular_aromatic_compound_metabolic_process	NA
gene5429	17354403	CHLNCDRAFT_135020	1477.32	771.921	0.522515	-0.936455	0.000893743	0.00809246	DOWN	Uncharacterized_protein	Esi_0302_0002	Ectocarpus_siliculosus (Brown_alga) (Conferva_siliculosa)	NA	DNA_binding [GO:0003677]	GO:0003677	GO:0003677~DNA_binding	NA	NA
gene5618	17354107	CHLNCDRAFT_135296	562.807	256.731	0.456161	-1.13238	3.27392e-05	0.000471023	DOWN	ERCC4_domain_containing_protein	Esi_0006_0201	Ectocarpus_siliculosus (Brown_alga) (Conferva_siliculosa)	NA	DNA_binding [GO:0003677]; nuclease_activity [GO:0004518]	GO:0003677; GO:0004518	GO:0003677~DNA_binding;GO:0004518~nuclease_activity	NA	NA
gene1364	17357891	CHLNCDRAFT_19722	3110.19	1515.73	0.487342	-1.03699	0.00137213	0.011353	DOWN	rRNA_intron-encoded_homing_endonuclease	Esi_0084_0039	Ectocarpus_siliculosus (Brown_alga) (Conferva_siliculosa)	NA	endonuclease_activity [GO:0004519]	GO:0004519	GO:0004519~endonuclease_activity	NA	NA
gene2026	17357311	CHLNCDRAFT_20360	3903.47	1446.52	0.370574	-1.43217	8.64957e-06	0.000144786	DOWN	Uncharacterized_protein	Esi_0104_0026	Ectocarpus_siliculosus (Brown_alga) (Conferva_siliculosa)	NA	flavin_adenine_dinucleotide_binding [GO:0050660]; tRNA_wobble_uridine_modification [GO:0002098]	GO:0002098; GO:0050660	GO:0050660~flavin_adenine_dinucleotide_binding	GO:0002098~tRNA_wobble_uridine_modification	NA
gene4144	17355462	CHLNCDRAFT_145257	2805.69	165.329	0.0589262	-4.08495	3.88175e-35	2.19776e-32	DOWN	Endo-1,3-beta-glucanase, family_GH16 (EC_3.2.1.39)	Esi_0059_0009	Ectocarpus_siliculosus (Brown_alga) (Conferva_siliculosa)	NA	glucan_endo-1,3-beta-D-glucosidase_activity [GO:0042973]; carbohydrate_metabolic_process [GO:0005975]	GO:0005975; GO:0042973	GO:0042973~glucan_endo-1,3-beta-D-glucosidase_activity	GO:0005975~carbohydrate_metabolic_process	NA
gene2276	17357445	CHLNCDRAFT_30197	2885.46	1252.91	0.434215	-1.20352	9.62489e-05	0.00120311	DOWN	Glycerol-3-phosphate_dehydrogenase [NAD(+)] (EC_1.1.1.8)	GPD_Esi_0339_0027	Ectocarpus_siliculosus (Brown_alga) (Conferva_siliculosa)	NA	glycerol-3-phosphate_dehydrogenase_complex [GO:0009331]; glycerol-3-phosphate_dehydrogenase [NAD+] activity [GO:0004367]; NAD_binding [GO:0051287]; carbohydrate_metabolic_process [GO:0005975]; glycerol-3-phosphate_catabolic_process [GO:0046168]	GO:0004367; GO:0005975; GO:0009331; GO:0046168; GO:0051287	GO:0004367~glycerol-3-phosphate_dehydrogenase [NAD+] activity;GO:0051287~NAD_binding	GO:0005975~carbohydrate_metabolic_process;GO:0046168~glycerol-3-phosphate_catabolic_process	GO:0009331~glycerol-3-phosphate_dehydrogenase_complex
gene2696	17357084	CHLNCDRAFT_34749	6328.56	2936.12	0.463948	-1.10797	0.0011937	0.0100696	DOWN	Dynamin-related_protein_1	DRP1	Tetrabaena_socialis	NA	GTP_binding [GO:0005525]; GTPase_activity [GO:0003924]	GO:0003924; GO:0005525	GO:0003924~GTPase_activity;GO:0005525~GTP_binding	NA	NA
gene2939	17356557	CHLNCDRAFT_21811	1543.19	799.785	0.518268	-0.94823	0.000784563	0.00727497	DOWN	Dynamin-related_protein_1	DRP1	Tetrabaena_socialis	NA	GTP_binding [GO:0005525]; GTPase_activity [GO:0003924]	GO:0003924; GO:0005525	GO:0003924~GTPase_activity;GO:0005525~GTP_binding	NA	NA
gene3897	17355625	CHLNCDRAFT_14705	536.104	117.09	0.21841	-2.19489	8.4801e-14	6.32721e-12	DOWN	Uncharacterized_protein	Esi_0009_0109	Ectocarpus_siliculosus (Brown_alga) (Conferva_siliculosa)	NA	GTPase_activator_activity [GO:0005096]; metal_ion_binding [GO:0046872]	GO:0005096; GO:0046872	GO:0005096~GTPase_activator_activity;GO:0046872~metal_ion_binding	NA	NA
gene8027	17351493	CHLNCDRAFT_9678	1557.58	827.784	0.531453	-0.911985	0.00137743	0.0113703	DOWN	Calcineurin-like_phosphoesterase_family_protein	Esi_0089_0101	Ectocarpus_siliculosus (Brown_alga) (Conferva_siliculosa)	NA	hydrolase_activity [GO:0016787]	GO:0016787	GO:0016787~hydrolase_activity	NA	NA
gene979	17358786	CHLNCDRAFT_137944	943.765	449.53	0.476316	-1.07001	8.58831e-05	0.00109053	DOWN	Uncharacterized_protein	Esi_0183_0062	Ectocarpus_siliculosus (Brown_alga) (Conferva_siliculosa)	NA	hydrolase_activity [GO:0016787]; lipid_catabolic_process [GO:0016042]	GO:0016042; GO:0016787	GO:0016787~hydrolase_activity	GO:0016042~lipid_catabolic_process	NA
gene4275	17355526	CHLNCDRAFT_31004	638.902	288.583	0.451687	-1.14661	2.69656e-05	0.000397463	DOWN	RNA_pyrophosphohydrolase (EC_3.6.1.-) ((Di)nucleoside_polyphosphate_hydrolase)	rppH_nudH_BN1012_Phect1242	Candidatus_Phaeomarinobacter_ectocarpi	NA	hydrolase_activity, acting_on_acid_anhydrides, in_phosphorus-containing_anhydrides [GO:0016818]	GO:0016818	GO:0016818~hydrolase_activity, acting_on_acid_anhydrides, in_phosphorus-containing_anhydrides	NA	NA
gene9490	17350130	CHLNCDRAFT_28813	646.57	321.761	0.497644	-1.00682	0.000201507	0.00225	DOWN	Uncharacterized_protein	Esi_0041_0130	Ectocarpus_siliculosus (Brown_alga) (Conferva_siliculosa)	NA	integral_component_of_membrane [GO:0016021]	GO:0016021	NA	NA	GO:0016021~integral_component_of_membrane
gene7599	17352114	CHLNCDRAFT_138698	2055.54	762.669	0.371031	-1.43039	1.06238e-06	2.24733e-05	DOWN	Uncharacterized_protein	Esi_0019_0152	Ectocarpus_siliculosus (Brown_alga) (Conferva_siliculosa)	NA	integral_component_of_membrane [GO:0016021]	GO:0016021	NA	NA	GO:0016021~integral_component_of_membrane
gene6884	17352621	CHLNCDRAFT_36538	1138.77	557.711	0.489748	-1.02989	0.000182987	0.00208679	DOWN	Uncharacterized_protein	Esi_0205_0014	Ectocarpus_siliculosus (Brown_alga) (Conferva_siliculosa)	NA	integral_component_of_membrane [GO:0016021]; ATP_binding [GO:0005524]; ATPase_activity [GO:0016887]	GO:0005524; GO:0016021; GO:0016887	GO:0005524~ATP_binding;GO:0016887~ATPase_activity	NA	GO:0016021~integral_component_of_membrane
gene2458	17356769	CHLNCDRAFT_57211	7969.32	1802.13	0.226134	-2.14475	1.32641e-09	5.25378e-08	DOWN	Uncharacterized_protein	Esi_0154_0007	Ectocarpus_siliculosus (Brown_alga) (Conferva_siliculosa)	NA	integral_component_of_membrane [GO:0016021]; ATP_binding [GO:0005524]; ATPase_activity, coupled_to_transmembrane_movement_of_substances [GO:0042626]	GO:0005524; GO:0016021; GO:0042626	GO:0005524~ATP_binding;GO:0042626~ATPase_activity, coupled_to_transmembrane_movement_of_substances	NA	GO:0016021~integral_component_of_membrane
gene2459	17357179	CHLNCDRAFT_30336	5885.75	1305.68	0.221838	-2.17242	2.60721e-10	1.16718e-08	DOWN	Uncharacterized_protein	Esi_0154_0007	Ectocarpus_siliculosus (Brown_alga) (Conferva_siliculosa)	NA	integral_component_of_membrane [GO:0016021]; ATP_binding [GO:0005524]; ATPase_activity, coupled_to_transmembrane_movement_of_substances [GO:0042626]	GO:0005524; GO:0016021; GO:0042626	GO:0005524~ATP_binding;GO:0042626~ATPase_activity, coupled_to_transmembrane_movement_of_substances	NA	GO:0016021~integral_component_of_membrane
gene7450	17352279	CHLNCDRAFT_138483	1792.3	441.36	0.246253	-2.02179	2.95702e-12	1.76778e-10	DOWN	Uncharacterized_protein	Esi_0041_0161	Ectocarpus_siliculosus (Brown_alga) (Conferva_siliculosa)	NA	integral_component_of_membrane [GO:0016021]; ATP_binding [GO:0005524]; ATPase_activity, coupled_to_transmembrane_movement_of_substances [GO:0042626]	GO:0005524; GO:0016021; GO:0042626	GO:0005524~ATP_binding;GO:0042626~ATPase_activity, coupled_to_transmembrane_movement_of_substances	NA	GO:0016021~integral_component_of_membrane
gene8306	17351322	CHLNCDRAFT_27272	826.13	478.522	0.579233	-0.787784	0.00377613	0.0262231	DOWN	Uncharacterized_protein	Esi_0161_0035	Ectocarpus_siliculosus (Brown_alga) (Conferva_siliculosa)	NA	integral_component_of_membrane [GO:0016021]; catalytic_activity [GO:0003824]; iron-sulfur_cluster_binding [GO:0051536]	GO:0003824; GO:0016021; GO:0051536	GO:0003824~catalytic_activity;GO:0051536~iron-sulfur_cluster_binding	NA	GO:0016021~integral_component_of_membrane
gene4841	17354678	CHLNCDRAFT_35559	1494.54	583.629	0.390508	-1.35658	1.40417e-06	2.92535e-05	DOWN	Outer_membrane-stress_sensor_serine_endopeptidase_DegS	BFS86_15590	Shewanella_algae	NA	integral_component_of_membrane [GO:0016021]; serine-type_endopeptidase_activity [GO:0004252]	GO:0004252; GO:0016021	GO:0004252~serine-type_endopeptidase_activity	NA	GO:0016021~integral_component_of_membrane
gene2908	17356563	CHLNCDRAFT_30535	3736.29	1824.05	0.4882	-1.03446	0.00120606	0.0101383	DOWN	Uncharacterized_protein	Esi_0132_0023	Ectocarpus_siliculosus (Brown_alga) (Conferva_siliculosa)	NA	integral_component_of_membrane [GO:0016021]; transmembrane_transporter_activity [GO:0022857]	GO:0016021; GO:0022857	GO:0022857~transmembrane_transporter_activity	NA	GO:0016021~integral_component_of_membrane
gene3700	17355935	CHLNCDRAFT_144603	752.544	383.009	0.508953	-0.974397	0.000298793	0.00316031	DOWN	NifU-like_protein_2, chloroplast (AtCNfu2) (AtCnfU-V)	Esi_0212_0056	Ectocarpus_siliculosus (Brown_alga) (Conferva_siliculosa)	NA	iron_ion_binding [GO:0005506]; iron-sulfur_cluster_binding [GO:0051536]; iron-sulfur_cluster_assembly [GO:0016226]	GO:0005506; GO:0016226; GO:0051536	GO:0005506~iron_ion_binding;GO:0051536~iron-sulfur_cluster_binding	GO:0016226~iron-sulfur_cluster_assembly	NA
gene289	17359126	CHLNCDRAFT_18624	3714.66	1362.5	0.36679	-1.44697	5.66642e-06	9.98888e-05	DOWN	Peptide-methionine (R)-S-oxide_reductase (EC_1.8.4.12)	Esi_0075_0020	Ectocarpus_siliculosus (Brown_alga) (Conferva_siliculosa)	NA	metal_ion_binding [GO:0046872]; peptide-methionine (R)-S-oxide_reductase_activity [GO:0033743]; protein_repair [GO:0030091]; response_to_oxidative_stress [GO:0006979]	GO:0006979; GO:0030091; GO:0033743; GO:0046872	GO:0033743~peptide-methionine (R)-S-oxide_reductase_activity;GO:0046872~metal_ion_binding	GO:0006979~response_to_oxidative_stress;GO:0030091~protein_repair	NA
gene7431	17352153	CHLNCDRAFT_26412	820.953	352.374	0.429226	-1.22019	6.70112e-06	0.000116213	DOWN	Zinc-carbooxypeptidase, M14D_family	REIFOR_02564	Reinekea_forsetii	NA	metallocarboxypeptidase_activity [GO:0004181]; zinc_ion_binding [GO:0008270]	GO:0004181; GO:0008270	GO:0004181~metallocarboxypeptidase_activity;GO:0008270~zinc_ion_binding	NA	NA
gene8972	17350731	CHLNCDRAFT_141273	1026.82	465.639	0.453477	-1.1409	2.48964e-05	0.000372672	DOWN	Uncharacterized_protein	Esi_0088_0039	Ectocarpus_siliculosus (Brown_alga) (Conferva_siliculosa)	NA	metalloendopeptidase_activity [GO:0004222]	GO:0004222	GO:0004222~metalloendopeptidase_activity	NA	NA
gene8981	17350713	CHLNCDRAFT_33194	4819.98	2599.13	0.539241	-0.890997	0.00722307	0.0437246	DOWN	Flagellar_associated_protein	Esi_0126_0019	Ectocarpus_siliculosus (Brown_alga) (Conferva_siliculosa)	NA	motile_cilium [GO:0031514]	GO:0031514	NA	NA	GO:0031514~motile_cilium
gene166	17359497	CHLNCDRAFT_133075	791.376	485.512	0.613503	-0.704858	0.00844416	0.0494148	DOWN	NA	NA	NA	NA	NA	NA	NA	NA	NA
gene5998	17353561	CHLNCDRAFT_135791	156.887	77.1757	0.491918	-1.02351	0.00836049	0.0490669	DOWN	NA	NA	NA	NA	NA	NA	NA	NA	NA
gene7383	17352192	CHLNCDRAFT_138394	90.9517	37.94	0.417144	-1.26138	0.00824493	0.0485652	DOWN	NA	NA	NA	NA	NA	NA	NA	NA	NA
gene291	17359127	CHLNCDRAFT_133230	1526.61	907.325	0.594341	-0.750638	0.00823416	0.0485326	DOWN	NA	NA	NA	NA	NA	NA	NA	NA	NA
gene4591	17354885	CHLNCDRAFT_52326	1794.91	1058.08	0.589492	-0.762456	0.00821493	0.048449	DOWN	NA	NA	NA	NA	NA	NA	NA	NA	NA
gene6211	17353445	CHLNCDRAFT_58379	1850.52	1090.2	0.58913	-0.763343	0.00810769	0.0478458	DOWN	NA	NA	NA	NA	NA	NA	NA	NA	NA
gene4477	17355072	CHLNCDRAFT_133789	591.486	360.409	0.609328	-0.714709	0.00805517	0.0475943	DOWN	NA	NA	NA	NA	NA	NA	NA	NA	NA
gene6011	17353552	CHLNCDRAFT_135810	168.563	84.8861	0.503587	-0.989687	0.00805275	0.0475943	DOWN	NA	NA	NA	NA	NA	NA	NA	NA	NA
gene3609	17356169	CHLNCDRAFT_144484	2191.05	1268.91	0.579135	-0.788029	0.00794321	0.0470193	DOWN	NA	NA	NA	NA	NA	NA	NA	NA	NA
gene9136	17350443	CHLNCDRAFT_13731	18.4897	4.34763	0.235139	-2.08842	0.00793284	0.0469868	DOWN	NA	NA	NA	NA	NA	NA	NA	NA	NA
gene3995	17355831	CHLNCDRAFT_59657	1111.74	675.854	0.607924	-0.718038	0.00788817	0.0467657	DOWN	NA	NA	NA	NA	NA	NA	NA	NA	NA
gene6089	17353375	CHLNCDRAFT_36198	2120.85	1222.58	0.576456	-0.794718	0.00787039	0.046732	DOWN	NA	NA	NA	NA	NA	NA	NA	NA	NA
gene4100	17355307	CHLNCDRAFT_12207	593.68	363.072	0.611562	-0.70943	0.00782995	0.046578	DOWN	NA	NA	NA	NA	NA	NA	NA	NA	NA
gene4242	17355388	CHLNCDRAFT_145388	1470.12	876.876	0.596466	-0.745489	0.00782605	0.046578	DOWN	NA	NA	NA	NA	NA	NA	NA	NA	NA
gene7733	17351792	CHLNCDRAFT_138874	6.19815	0.372521	0.0601019	-4.05644	0.00776488	0.0463341	DOWN	Uncharacterized_protein	Esi_0339_0016	Ectocarpus_siliculosus (Brown_alga) (Conferva_siliculosa)	NA	NA	NA	NA	NA	NA
gene5122	17354318	CHLNCDRAFT_134673	1804.64	1058.34	0.586456	-0.769905	0.0076494	0.0457585	DOWN	NA	NA	NA	NA	NA	NA	NA	NA	NA
gene5884	17353776	CHLNCDRAFT_135651	15.743	3.18786	0.202494	-2.30405	0.00751131	0.0450445	DOWN	NA	NA	NA	NA	NA	NA	NA	NA	NA
gene5458	17354139	CHLNCDRAFT_135077	42.1574	13.4288	0.318539	-1.65046	0.00738847	0.0443908	DOWN	NA	NA	NA	NA	NA	NA	NA	NA	NA
gene6925	17352763	CHLNCDRAFT_137076	314.707	179.85	0.571482	-0.807221	0.00735921	0.044298	DOWN	NA	NA	NA	NA	NA	NA	NA	NA	NA
gene4447	17354941	CHLNCDRAFT_133737	396.721	236.601	0.596393	-0.745666	0.00734949	0.0442949	DOWN	NA	NA	NA	NA	NA	NA	NA	NA	NA
gene6010	17353858	CHLNCDRAFT_135809	816.05	496.321	0.6082	-0.717383	0.00728085	0.0439913	DOWN	NA	NA	NA	NA	NA	NA	NA	NA	NA
gene9589	17350033	CHLNCDRAFT_59486	775.663	467.323	0.602483	-0.731008	0.00719757	0.0435976	DOWN	NA	NA	NA	NA	NA	NA	NA	NA	NA
gene2122	17357718	CHLNCDRAFT_142233	983.048	592	0.602209	-0.731664	0.00718349	0.0435397	DOWN	NA	NA	NA	NA	NA	NA	NA	NA	NA
gene2916	17356576	CHLNCDRAFT_143502	423.94	254.375	0.600026	-0.736903	0.00710945	0.0431998	DOWN	NA	NA	NA	NA	NA	NA	NA	NA	NA
gene5477	17353948	CHLNCDRAFT_52907	773.831	471.006	0.608668	-0.716272	0.00708015	0.0430489	DOWN	NA	NA	NA	NA	NA	NA	NA	NA	NA
gene2167	17357743	CHLNCDRAFT_142285	329.971	190.928	0.578621	-0.789308	0.0070158	0.0427386	DOWN	NA	NA	NA	NA	NA	NA	NA	NA	NA
gene875	17358865	CHLNCDRAFT_49913	17.0483	3.31112	0.19422	-2.36424	0.0069199	0.0422079	DOWN	NA	NA	NA	NA	NA	NA	NA	NA	NA
gene5080	17354412	CHLNCDRAFT_134624	2741.18	1541.71	0.562426	-0.830266	0.00680263	0.0415717	DOWN	NA	NA	NA	NA	NA	NA	NA	NA	NA
gene6151	17353380	CHLNCDRAFT_136009	669.06	405.811	0.60654	-0.721326	0.00674388	0.0412912	DOWN	NA	NA	NA	NA	NA	NA	NA	NA	NA
gene442	17359047	CHLNCDRAFT_133431	659.021	398.256	0.604315	-0.726628	0.00666207	0.0409243	DOWN	NA	NA	NA	NA	NA	NA	NA	NA	NA
gene8771	17350816	CHLNCDRAFT_59244	167.074	83.0329	0.496984	-1.00873	0.00661176	0.0406634	DOWN	NA	NA	NA	NA	NA	NA	NA	NA	NA
gene6963	17352620	CHLNCDRAFT_137120	1347.56	794.5	0.589583	-0.762233	0.00658648	0.0405409	DOWN	NA	NA	NA	NA	NA	NA	NA	NA	NA
gene1096	17358710	CHLNCDRAFT_138090	418.11	247.801	0.592669	-0.754702	0.00654956	0.0403841	DOWN	NA	NA	NA	NA	NA	NA	NA	NA	NA
gene3796	17355701	CHLNCDRAFT_14441	39.4686	12.1377	0.307528	-1.70121	0.00649173	0.0400788	DOWN	NA	NA	NA	NA	NA	NA	NA	NA	NA
gene4254	17355407	CHLNCDRAFT_145403	576.651	346.656	0.601154	-0.734194	0.00647762	0.0400383	DOWN	NA	NA	NA	NA	NA	NA	NA	NA	NA
gene8135	17351581	CHLNCDRAFT_139412	795.349	479.918	0.603405	-0.728802	0.00647403	0.0400383	DOWN	NA	NA	NA	NA	NA	NA	NA	NA	NA
gene3824	17355911	CHLNCDRAFT_57605	2153.1	1231.65	0.572036	-0.805822	0.00645138	0.0399579	DOWN	NA	NA	NA	NA	NA	NA	NA	NA	NA
gene8970	17350706	CHLNCDRAFT_59822	265.364	145.794	0.549409	-0.864048	0.00640187	0.0397023	DOWN	NA	NA	NA	NA	NA	NA	NA	NA	NA
gene8922	17350671	CHLNCDRAFT_141220	6.25687	0.372521	0.0595379	-4.07005	0.0063161	0.0392716	DOWN	NA	NA	NA	NA	NA	NA	NA	NA	NA
gene3716	17355593	CHLNCDRAFT_144686	843.382	509.443	0.604047	-0.727268	0.0062903	0.03914	DOWN	NA	NA	NA	NA	NA	NA	NA	NA	NA
gene4243	17355389	CHLNCDRAFT_145389	1937.86	1112.78	0.574233	-0.800292	0.00629087	0.03914	DOWN	NA	NA	NA	NA	NA	NA	NA	NA	NA
gene8591	17351071	CHLNCDRAFT_140023	331.781	189.956	0.572534	-0.804568	0.00626566	0.0390785	DOWN	NA	NA	NA	NA	NA	NA	NA	NA	NA
gene4040	17355692	CHLNCDRAFT_145114	1685.97	971.597	0.576285	-0.795147	0.00616933	0.0386069	DOWN	NA	NA	NA	NA	NA	NA	NA	NA	NA
gene5654	17353900	CHLNCDRAFT_135343	4533.21	2413.66	0.53244	-0.90931	0.0060766	0.0381025	DOWN	NA	NA	NA	NA	NA	NA	NA	NA	NA
gene7388	17352210	CHLNCDRAFT_138400	206.672	105.761	0.511735	-0.966531	0.00603785	0.0379336	DOWN	NA	NA	NA	NA	NA	NA	NA	NA	NA
gene2444	17356859	CHLNCDRAFT_142824	1241.61	733.503	0.590768	-0.759338	0.00602571	0.0378821	DOWN	NA	NA	NA	NA	NA	NA	NA	NA	NA
gene7075	17352434	CHLNCDRAFT_137273	617.719	371.48	0.601374	-0.733667	0.00602136	0.0378821	DOWN	NA	NA	NA	NA	NA	NA	NA	NA	NA
gene2952	17356567	CHLNCDRAFT_143552	598.141	360.398	0.60253	-0.730894	0.00595826	0.0375316	DOWN	NA	NA	NA	NA	NA	NA	NA	NA	NA
gene5011	17354776	CHLNCDRAFT_134501	776.263	465.589	0.599783	-0.737489	0.00592771	0.0373957	DOWN	NA	NA	NA	NA	NA	NA	NA	NA	NA
gene4938	17354778	CHLNCDRAFT_134390	7721.69	3978.01	0.515173	-0.95687	0.00588579	0.0371968	DOWN	NA	NA	NA	NA	NA	NA	NA	NA	NA
gene1181	17358919	CHLNCDRAFT_138187	2121.05	1204.02	0.567654	-0.816917	0.00586754	0.0371302	DOWN	NA	NA	NA	NA	NA	NA	NA	NA	NA
gene3557	17356049	CHLNCDRAFT_57525	1687.93	977.2	0.578933	-0.788533	0.00574649	0.0364901	DOWN	NA	NA	NA	NA	NA	NA	NA	NA	NA
gene1071	17358670	CHLNCDRAFT_138061	849.713	511.283	0.601713	-0.732853	0.00572962	0.0364492	DOWN	NA	NA	NA	NA	NA	NA	NA	NA	NA
gene4626	17354883	CHLNCDRAFT_133973	198.743	100.493	0.505643	-0.98381	0.00569378	0.0362704	DOWN	NA	NA	NA	NA	NA	NA	NA	NA	NA
gene1652	17357878	CHLNCDRAFT_140764	981.129	584.658	0.595903	-0.746851	0.00568122	0.0362692	DOWN	NA	NA	NA	NA	NA	NA	NA	NA	NA
gene3604	17356146	CHLNCDRAFT_57538	877.433	522.862	0.5959	-0.746857	0.00566858	0.0362285	DOWN	NA	NA	NA	NA	NA	NA	NA	NA	NA
gene3387	17356156	CHLNCDRAFT_17454	1168.73	687.544	0.588284	-0.765416	0.00560697	0.0358823	DOWN	NA	NA	NA	NA	NA	NA	NA	NA	NA
gene2614	17356864	CHLNCDRAFT_143023	1000.66	593.294	0.592904	-0.754129	0.00557432	0.0356972	DOWN	NA	NA	NA	NA	NA	NA	NA	NA	NA
gene2674	17357300	CHLNCDRAFT_57292	1392.15	814.093	0.584772	-0.774053	0.00551713	0.0354252	DOWN	NA	NA	NA	NA	NA	NA	NA	NA	NA
gene5100	17354484	CHLNCDRAFT_134649	1165.98	685.822	0.588195	-0.765634	0.00545576	0.0351014	DOWN	NA	NA	NA	NA	NA	NA	NA	NA	NA
gene6664	17352952	CHLNCDRAFT_136713	639.237	380.603	0.595402	-0.748064	0.00531379	0.0343487	DOWN	NA	NA	NA	NA	NA	NA	NA	NA	NA
gene623	17359238	CHLNCDRAFT_133696	365.998	210.849	0.576094	-0.795625	0.00528036	0.0342476	DOWN	NA	NA	NA	NA	NA	NA	NA	NA	NA
gene7445	17352274	CHLNCDRAFT_138476	1069.08	628.939	0.5883	-0.765376	0.00523625	0.0339844	DOWN	NA	NA	NA	NA	NA	NA	NA	NA	NA
gene2973	17356604	CHLNCDRAFT_143577	103.879	42.7519	0.411555	-1.28084	0.00518534	0.0336994	DOWN	NA	NA	NA	NA	NA	NA	NA	NA	NA
gene571	17359024	CHLNCDRAFT_49694	2169.04	1220.41	0.562653	-0.829683	0.00517783	0.0336871	DOWN	NA	NA	NA	NA	NA	NA	NA	NA	NA
gene7030	17352647	CHLNCDRAFT_137199	787.131	467.898	0.594434	-0.750411	0.00508276	0.0331447	DOWN	NA	NA	NA	NA	NA	NA	NA	NA	NA
gene2322	17357211	CHLNCDRAFT_57166	764.859	452.103	0.591093	-0.758542	0.00504127	0.0329071	DOWN	NA	NA	NA	NA	NA	NA	NA	NA	NA
gene9447	17350172	CHLNCDRAFT_142547	4489.67	2356.5	0.524871	-0.929965	0.00494546	0.0324251	DOWN	NA	NA	NA	NA	NA	NA	NA	NA	NA
gene4001	17355863	CHLNCDRAFT_57660	758.146	448.781	0.591946	-0.756462	0.00490211	0.0321847	DOWN	NA	NA	NA	NA	NA	NA	NA	NA	NA
gene1256	17358093	CHLNCDRAFT_56823	4526.99	2375.91	0.524833	-0.930069	0.00488029	0.0320852	DOWN	NA	NA	NA	NA	NA	NA	NA	NA	NA
gene8072	17351515	CHLNCDRAFT_139333	2745.67	1501.97	0.547034	-0.870298	0.00482367	0.0318217	DOWN	NA	NA	NA	NA	NA	NA	NA	NA	NA
gene7444	17352225	CHLNCDRAFT_138475	614.257	361.471	0.588469	-0.764962	0.00478859	0.0316336	DOWN	NA	NA	NA	NA	NA	NA	NA	NA	NA
gene996	17358871	CHLNCDRAFT_137965	416.552	239.255	0.574369	-0.79995	0.00477807	0.0316033	DOWN	NA	NA	NA	NA	NA	NA	NA	NA	NA
gene3141	17356361	CHLNCDRAFT_143816	1607.78	914.769	0.568963	-0.813593	0.00472697	0.0314424	DOWN	NA	NA	NA	NA	NA	NA	NA	NA	NA
gene9130	17350523	CHLNCDRAFT_141480	16.5966	3.07127	0.185055	-2.43398	0.00470509	0.0313618	DOWN	NA	NA	NA	NA	NA	NA	NA	NA	NA
gene9008	17350602	CHLNCDRAFT_141314	224.494	116.503	0.518959	-0.946309	0.00469206	0.0312967	DOWN	NA	NA	NA	NA	NA	NA	NA	NA	NA
gene6705	17352876	CHLNCDRAFT_136764	133.337	59.3136	0.444841	-1.16864	0.00466062	0.0311085	DOWN	NA	NA	NA	NA	NA	NA	NA	NA	NA
gene9049	17350581	CHLNCDRAFT_141361	428.074	246.89	0.576746	-0.793992	0.00465784	0.0311085	DOWN	NA	NA	NA	NA	NA	NA	NA	NA	NA
gene9135	17350454	CHLNCDRAFT_13490	380.386	219.124	0.576055	-0.795721	0.00462669	0.0309249	DOWN	NA	NA	NA	NA	NA	NA	NA	NA	NA
gene2012	17357651	CHLNCDRAFT_142100	2207.37	1230.23	0.557329	-0.843399	0.00462245	0.0309181	DOWN	NA	NA	NA	NA	NA	NA	NA	NA	NA
gene1533	17358330	CHLNCDRAFT_140622	1602.97	910.402	0.567947	-0.816171	0.00455507	0.0305098	DOWN	NA	NA	NA	NA	NA	NA	NA	NA	NA
gene4022	17355583	CHLNCDRAFT_145091	1796.54	1011.85	0.563222	-0.828225	0.00452324	0.0303177	DOWN	NA	NA	NA	NA	NA	NA	NA	NA	NA
gene556	17359207	CHLNCDRAFT_133589	638.549	374.661	0.586737	-0.769213	0.00441849	0.0296776	DOWN	NA	NA	NA	NA	NA	NA	NA	NA	NA
gene1501	17358214	CHLNCDRAFT_140579	531.185	310.478	0.584501	-0.774722	0.00436894	0.0294064	DOWN	NA	NA	NA	NA	NA	NA	NA	NA	NA
gene431	17359457	CHLNCDRAFT_49587	399.34	228.276	0.571635	-0.806835	0.00436325	0.0293889	DOWN	NA	NA	NA	NA	NA	NA	NA	NA	NA
gene833	17358738	CHLNCDRAFT_137778	1058.52	618.887	0.584673	-0.774297	0.00436329	0.0293889	DOWN	NA	NA	NA	NA	NA	NA	NA	NA	NA
gene4973	17354680	CHLNCDRAFT_134443	992.746	582.067	0.58632	-0.77024	0.00435359	0.0293646	DOWN	NA	NA	NA	NA	NA	NA	NA	NA	NA
gene9497	17350128	CHLNCDRAFT_142619	1691.17	962.669	0.569232	-0.812911	0.00434441	0.0293233	DOWN	NA	NA	NA	NA	NA	NA	NA	NA	NA
gene2640	17357174	CHLNCDRAFT_51050	1303.58	753.728	0.578197	-0.790368	0.00433793	0.0293001	DOWN	NA	NA	NA	NA	NA	NA	NA	NA	NA
gene7191	17352561	CHLNCDRAFT_137425	1565.08	891.26	0.569467	-0.812315	0.00431378	0.0292006	DOWN	NA	NA	NA	NA	NA	NA	NA	NA	NA
gene731	17358474	CHLNCDRAFT_137655	16.1939	2.76508	0.170749	-2.55005	0.00422563	0.028723	DOWN	NA	NA	NA	NA	NA	NA	NA	NA	NA
gene3790	17355815	CHLNCDRAFT_144789	1044.95	611.147	0.584859	-0.773839	0.00419612	0.0285425	DOWN	NA	NA	NA	NA	NA	NA	NA	NA	NA
gene3429	17355949	CHLNCDRAFT_144240	4864.14	2516.48	0.517354	-0.950775	0.00416109	0.0283644	DOWN	NA	NA	NA	NA	NA	NA	NA	NA	NA
gene424	17359280	CHLNCDRAFT_133408	271.036	145.655	0.537401	-0.895928	0.00414049	0.028284	DOWN	NA	NA	NA	NA	NA	NA	NA	NA	NA
gene8172	17351411	CHLNCDRAFT_139469	305.171	168.798	0.553127	-0.854318	0.00413267	0.0282507	DOWN	NA	NA	NA	NA	NA	NA	NA	NA	NA
gene7777	17351964	CHLNCDRAFT_138924	29.9981	7.74117	0.258055	-1.95425	0.00406122	0.0278811	DOWN	NA	NA	NA	NA	NA	NA	NA	NA	NA
gene1050	17358619	CHLNCDRAFT_138033	196.9	96.5628	0.490416	-1.02792	0.00402936	0.0277216	DOWN	NA	NA	NA	NA	NA	NA	NA	NA	NA
gene8239	17351447	CHLNCDRAFT_139555	969.937	565.798	0.583335	-0.777604	0.0038853	0.0268649	DOWN	NA	NA	NA	NA	NA	NA	NA	NA	NA
gene7434	17352259	CHLNCDRAFT_138465	958.483	560.713	0.585	-0.773491	0.0038576	0.0267118	DOWN	NA	NA	NA	NA	NA	NA	NA	NA	NA
gene351	17359613	CHLNCDRAFT_133304	761.607	443.652	0.582521	-0.779618	0.0037381	0.0260154	DOWN	NA	NA	NA	NA	NA	NA	NA	NA	NA
gene9250	17350387	CHLNCDRAFT_55445	148.506	65.4393	0.440652	-1.18229	0.00371992	0.0259184	DOWN	NA	NA	NA	NA	NA	NA	NA	NA	NA
gene2265	17357359	CHLNCDRAFT_50798	692.279	402.47	0.581369	-0.782473	0.00368067	0.0256713	DOWN	NA	NA	NA	NA	NA	NA	NA	NA	NA
gene7386	17352344	CHLNCDRAFT_58752	4299.81	2223.05	0.517011	-0.951733	0.00366173	0.0255949	DOWN	NA	NA	NA	NA	NA	NA	NA	NA	NA
gene8930	17350691	CHLNCDRAFT_141228	2146.27	1175.56	0.547722	-0.868483	0.00366113	0.0255949	DOWN	NA	NA	NA	NA	NA	NA	NA	NA	NA
gene1116	17358769	CHLNCDRAFT_138112	4193.4	2172.2	0.518004	-0.948965	0.00361867	0.0253676	DOWN	NA	NA	NA	NA	NA	NA	NA	NA	NA
gene333	17358993	CHLNCDRAFT_133279	1571.57	879.851	0.559853	-0.836879	0.00360964	0.0253531	DOWN	NA	NA	NA	NA	NA	NA	NA	NA	NA
gene1891	17357319	CHLNCDRAFT_57026	3894.91	2031.34	0.521536	-0.939162	0.00360753	0.0253531	DOWN	NA	NA	NA	NA	NA	NA	NA	NA	NA
gene1927	17357611	CHLNCDRAFT_142005	12.7868	1.76411	0.137964	-2.85764	0.0036131	0.0253531	DOWN	NA	NA	NA	NA	NA	NA	NA	NA	NA
gene2784	17356851	CHLNCDRAFT_143246	4262.92	2213.96	0.519353	-0.945212	0.00361397	0.0253531	DOWN	Uncharacterized_protein	KLA_11200	Cellulophaga_geojensis_KL-A	NA	NA	NA	NA	NA	NA
gene7012	17352633	CHLNCDRAFT_36600	2102.81	1153.15	0.548383	-0.866744	0.00358364	0.0252138	DOWN	NA	NA	NA	NA	NA	NA	NA	NA	NA
gene1588	17358063	CHLNCDRAFT_50349	307.917	166.437	0.540525	-0.887568	0.00357697	0.0251853	DOWN	NA	NA	NA	NA	NA	NA	NA	NA	NA
gene9550	17350073	CHLNCDRAFT_59472	516.848	298.012	0.576594	-0.794372	0.00355096	0.0250205	DOWN	NA	NA	NA	NA	NA	NA	NA	NA	NA
gene7072	17352422	CHLNCDRAFT_58664	1974.91	1095.35	0.554634	-0.850392	0.00354444	0.0249991	DOWN	NA	NA	NA	NA	NA	NA	NA	NA	NA
gene7423	17352234	CHLNCDRAFT_138448	410.187	231.996	0.565587	-0.82218	0.00351609	0.0248475	DOWN	NA	NA	NA	NA	NA	NA	NA	NA	NA
gene3891	17355665	CHLNCDRAFT_144919	3049.43	1616.72	0.530172	-0.915466	0.00343468	0.0243617	DOWN	NA	NA	NA	NA	NA	NA	NA	NA	NA
gene3200	17356457	CHLNCDRAFT_143887	1206.31	690.808	0.57266	-0.804249	0.00342361	0.0243369	DOWN	NA	NA	NA	NA	NA	NA	NA	NA	NA
gene6597	17353021	CHLNCDRAFT_58510	2519.75	1361.31	0.540255	-0.888287	0.00342092	0.0243358	DOWN	NA	NA	NA	NA	NA	NA	NA	NA	NA
gene2393	17357130	CHLNCDRAFT_50882	528.073	306.04	0.579542	-0.787016	0.00339878	0.0241962	DOWN	NA	NA	NA	NA	NA	NA	NA	NA	NA
gene9233	17350412	CHLNCDRAFT_33282	660.53	382.97	0.579792	-0.786392	0.00339252	0.0241695	DOWN	Uncharacterized_protein	Esi_0101_0083	Ectocarpus_siliculosus (Brown_alga) (Conferva_siliculosa)	NA	NA	NA	NA	NA	NA
gene6218	17353452	CHLNCDRAFT_136095	261.65	138.164	0.528051	-0.92125	0.00338328	0.0241516	DOWN	NA	NA	NA	NA	NA	NA	NA	NA	NA
gene6359	17353213	CHLNCDRAFT_8997	361.099	199.915	0.553628	-0.85301	0.0033875	0.0241516	DOWN	NA	NA	NA	NA	NA	NA	NA	NA	NA
gene9385	17350242	CHLNCDRAFT_28701	1265.94	718.807	0.567807	-0.816527	0.00338509	0.0241516	DOWN	NA	NA	NA	NA	NA	NA	NA	NA	NA
gene1360	17358043	CHLNCDRAFT_48520	12486.1	5877.39	0.470715	-1.08708	0.00321598	0.0231344	DOWN	NA	NA	NA	NA	NA	NA	NA	NA	NA
gene1695	17357828	CHLNCDRAFT_140816	2417.69	1298.7	0.537163	-0.896568	0.00318805	0.0230022	DOWN	NA	NA	NA	NA	NA	NA	NA	NA	NA
gene2785	17357206	CHLNCDRAFT_143249	252.168	130.071	0.51581	-0.955087	0.00317538	0.022928	DOWN	NA	NA	NA	NA	NA	NA	NA	NA	NA
gene2394	17357131	CHLNCDRAFT_142764	83.6075	30.3174	0.362616	-1.46349	0.00314434	0.022738	DOWN	NA	NA	NA	NA	NA	NA	NA	NA	NA
gene568	17359549	CHLNCDRAFT_133607	2010.99	1100.21	0.5471	-0.870124	0.00310934	0.0225527	DOWN	NA	NA	NA	NA	NA	NA	NA	NA	NA
gene5549	17353949	CHLNCDRAFT_58151	4064.63	2078.44	0.511349	-0.96762	0.00310048	0.0225054	DOWN	NA	NA	NA	NA	NA	NA	NA	NA	NA
gene9251	17350395	CHLNCDRAFT_141642	727.257	418.008	0.574774	-0.798934	0.00309944	0.0225054	DOWN	NA	NA	NA	NA	NA	NA	NA	NA	NA
gene1583	17358088	CHLNCDRAFT_50346	447.377	252.879	0.565248	-0.823044	0.00306762	0.0223512	DOWN	NA	NA	NA	NA	NA	NA	NA	NA	NA
gene6764	17352937	CHLNCDRAFT_136849	129.094	55.0069	0.4261	-1.23074	0.00305034	0.0222421	DOWN	NA	NA	NA	NA	NA	NA	NA	NA	NA
gene542	17359540	CHLNCDRAFT_133570	1868.97	1030.48	0.551364	-0.858924	0.00299795	0.0219933	DOWN	NA	NA	NA	NA	NA	NA	NA	NA	NA
gene4687	17354949	CHLNCDRAFT_134046	2439.14	1302.52	0.534008	-0.905067	0.0029664	0.0218158	DOWN	NA	NA	NA	NA	NA	NA	NA	NA	NA
gene4748	17354867	CHLNCDRAFT_134125	543.744	309.049	0.568373	-0.815091	0.00296695	0.0218158	DOWN	NA	NA	NA	NA	NA	NA	NA	NA	NA
gene3345	17356054	CHLNCDRAFT_51499	499.045	284.359	0.569805	-0.811459	0.00293005	0.021625	DOWN	NA	NA	NA	NA	NA	NA	NA	NA	NA
gene5090	17354235	CHLNCDRAFT_58024	1448.94	814.022	0.561807	-0.831853	0.00293202	0.021625	DOWN	NA	NA	NA	NA	NA	NA	NA	NA	NA
gene1691	17357951	CHLNCDRAFT_20008	1187.13	674.935	0.568544	-0.814657	0.00287709	0.0212851	DOWN	NA	NA	NA	NA	NA	NA	NA	NA	NA
gene3496	17355940	CHLNCDRAFT_11527	133.743	56.9532	0.425841	-1.23161	0.0028512	0.0211424	DOWN	NA	NA	NA	NA	NA	NA	NA	NA	NA
gene6105	17353366	CHLNCDRAFT_135936	447.589	252.908	0.565045	-0.823561	0.00282653	0.0209918	DOWN	NA	NA	NA	NA	NA	NA	NA	NA	NA
gene2932	17356554	CHLNCDRAFT_143524	669.873	386.249	0.576601	-0.794356	0.00280831	0.0208887	DOWN	NA	NA	NA	NA	NA	NA	NA	NA	NA
gene6860	17352756	CHLNCDRAFT_53868	352.722	194.839	0.552386	-0.856251	0.00279377	0.0207966	DOWN	NA	NA	NA	NA	NA	NA	NA	NA	NA
gene1905	17357317	CHLNCDRAFT_141980	1140.52	648.047	0.568201	-0.815526	0.00278335	0.0207351	DOWN	NA	NA	NA	NA	NA	NA	NA	NA	NA
gene3294	17356037	CHLNCDRAFT_144085	229.376	113.836	0.496287	-1.01075	0.00276531	0.0206486	DOWN	NA	NA	NA	NA	NA	NA	NA	NA	NA
gene3278	17356329	CHLNCDRAFT_144065	41.4069	10.7367	0.259297	-1.94732	0.00268806	0.0201186	DOWN	NA	NA	NA	NA	NA	NA	NA	NA	NA
gene8734	17350916	CHLNCDRAFT_59230	3039.82	1583.29	0.52085	-0.941059	0.00263751	0.019771	DOWN	NA	NA	NA	NA	NA	NA	NA	NA	NA
gene4792	17354796	CHLNCDRAFT_134196	2447.67	1302.73	0.532231	-0.909876	0.00262289	0.0196768	DOWN	Ferredoxin (Cyanobacterial_type_ferredoxin_family)	Esi_0075_0044	Ectocarpus_siliculosus (Brown_alga) (Conferva_siliculosa)	NA	NA	NA	NA	NA	NA
gene1502	17358215	CHLNCDRAFT_140580	878.397	499.984	0.5692	-0.812991	0.00257447	0.0193588	DOWN	NA	NA	NA	NA	NA	NA	NA	NA	NA
gene1261	17358095	CHLNCDRAFT_140294	3539.82	1819.86	0.51411	-0.95985	0.00257187	0.0193544	DOWN	NA	NA	NA	NA	NA	NA	NA	NA	NA
gene2171	17357443	CHLNCDRAFT_50738	505.493	285.601	0.564994	-0.823692	0.00256589	0.0193245	DOWN	NA	NA	NA	NA	NA	NA	NA	NA	NA
gene4851	17354838	CHLNCDRAFT_134271	705.698	401.264	0.568606	-0.8145	0.00245239	0.0185276	DOWN	NA	NA	NA	NA	NA	NA	NA	NA	NA
gene791	17358457	CHLNCDRAFT_137732	341.449	183.728	0.538083	-0.8941	0.00243227	0.0184132	DOWN	NA	NA	NA	NA	NA	NA	NA	NA	NA
gene4412	17355318	CHLNCDRAFT_145616	1192.87	669.689	0.561411	-0.832871	0.00239933	0.0181982	DOWN	NA	NA	NA	NA	NA	NA	NA	NA	NA
gene962	17358765	CHLNCDRAFT_18825	1358.54	756.953	0.55718	-0.843785	0.0023822	0.0181112	DOWN	NA	NA	NA	NA	NA	NA	NA	NA	NA
gene9262	17350356	CHLNCDRAFT_141666	2249.55	1196	0.531664	-0.911414	0.00235131	0.0179187	DOWN	NA	NA	NA	NA	NA	NA	NA	NA	NA
gene9197	17350461	CHLNCDRAFT_141568	962.04	543.604	0.565053	-0.823542	0.00232899	0.0177627	DOWN	NA	NA	NA	NA	NA	NA	NA	NA	NA
gene3332	17356013	CHLNCDRAFT_144127	167.468	75.3373	0.449861	-1.15245	0.00231308	0.0176693	DOWN	NA	NA	NA	NA	NA	NA	NA	NA	NA
gene4946	17354688	CHLNCDRAFT_134405	1123.02	630.325	0.561275	-0.833219	0.00230034	0.017586	DOWN	NA	NA	NA	NA	NA	NA	NA	NA	NA
gene1362	17358044	CHLNCDRAFT_20170	188.759	84.5565	0.44796	-1.15856	0.00225255	0.0173031	DOWN	Uncharacterized_protein	Esi_0595_0003	Ectocarpus_siliculosus (Brown_alga) (Conferva_siliculosa)	NA	NA	NA	NA	NA	NA
gene328	17359585	CHLNCDRAFT_133274	1258.71	699.383	0.555636	-0.847788	0.0022352	0.0171836	DOWN	NA	NA	NA	NA	NA	NA	NA	NA	NA
gene9143	17350458	CHLNCDRAFT_28462	426.228	236.225	0.554223	-0.851462	0.00223322	0.017182	DOWN	NA	NA	NA	NA	NA	NA	NA	NA	NA
gene1219	17358609	CHLNCDRAFT_138232	4068.51	2028.48	0.498582	-1.0041	0.00213287	0.0164494	DOWN	NA	NA	NA	NA	NA	NA	NA	NA	NA
gene41	17359262	ELIP	1530.78	837.81	0.54731	-0.869569	0.00209302	0.016207	DOWN	NA	NA	NA	NA	NA	NA	NA	NA	NA
gene6667	17352851	CHLNCDRAFT_58530	1086.49	607.142	0.558812	-0.839566	0.00207464	0.0161165	DOWN	NA	NA	NA	NA	NA	NA	NA	NA	NA
gene4719	17355031	CHLNCDRAFT_134082	1137.53	632.23	0.555791	-0.847387	0.00200433	0.0156208	DOWN	NA	NA	NA	NA	NA	NA	NA	NA	NA
gene3745	17355889	CHLNCDRAFT_144725	1436.92	786.411	0.54729	-0.869624	0.00194649	0.0151946	DOWN	NA	NA	NA	NA	NA	NA	NA	NA	NA
gene3107	17356464	CHLNCDRAFT_143767	1362.75	749.733	0.550161	-0.862075	0.00194253	0.015176	DOWN	NA	NA	NA	NA	NA	NA	NA	NA	NA
gene3316	17356255	CHLNCDRAFT_59646	809.084	452.147	0.558839	-0.839496	0.00192259	0.0150447	DOWN	NA	NA	NA	NA	NA	NA	NA	NA	NA
gene4183	17355304	CHLNCDRAFT_7741	683.339	382.272	0.559418	-0.838001	0.00190681	0.0149333	DOWN	NA	NA	NA	NA	NA	NA	NA	NA	NA
gene1746	17358016	CHLNCDRAFT_19561	382.664	204.43	0.534227	-0.904475	0.00189143	0.0148249	DOWN	NA	NA	NA	NA	NA	NA	NA	NA	NA
gene7091	17352545	CHLNCDRAFT_137298	420.147	229.965	0.547344	-0.869481	0.00186986	0.0147019	DOWN	NA	NA	NA	NA	NA	NA	NA	NA	NA
gene3554	17356048	CHLNCDRAFT_51614	141.441	59.3049	0.419292	-1.25397	0.00185569	0.0146162	DOWN	NA	NA	NA	NA	NA	NA	NA	NA	NA
gene4430	17354972	CHLNCDRAFT_133715	541.459	302.477	0.558634	-0.840024	0.00183202	0.0144772	DOWN	NA	NA	NA	NA	NA	NA	NA	NA	NA
gene5151	17354200	CHLNCDRAFT_134710	2592.51	1340.99	0.517254	-0.951056	0.00182548	0.0144373	DOWN	NA	NA	NA	NA	NA	NA	NA	NA	NA
gene1319	17358195	CHLNCDRAFT_140361	1388.49	756.554	0.544875	-0.876004	0.00173612	0.0138101	DOWN	NA	NA	NA	NA	NA	NA	NA	NA	NA
gene9553	17350068	CHLNCDRAFT_144631	595.894	333.075	0.55895	-0.839209	0.00173466	0.0138099	DOWN	NA	NA	NA	NA	NA	NA	NA	NA	NA
gene8555	17350999	CHLNCDRAFT_139978	4345.61	2123.65	0.488689	-1.03301	0.00171942	0.0137112	DOWN	NA	NA	NA	NA	NA	NA	NA	NA	NA
gene3612	17356193	CHLNCDRAFT_144489	1500	814.534	0.543024	-0.880911	0.00169259	0.0135309	DOWN	NA	NA	NA	NA	NA	NA	NA	NA	NA
gene3940	17355708	CHLNCDRAFT_51873	1598.52	857.528	0.53645	-0.898483	0.00164934	0.0132401	DOWN	NA	NA	NA	NA	NA	NA	NA	NA	NA
gene7824	17351887	CHLNCDRAFT_138988	1892.91	1002.71	0.529719	-0.9167	0.00163183	0.0131105	DOWN	NA	NA	NA	NA	NA	NA	NA	NA	NA
gene2088	17357699	CHLNCDRAFT_57085	1453.81	789.205	0.542853	-0.881367	0.0016275	0.0130867	DOWN	NA	NA	NA	NA	NA	NA	NA	NA	NA
gene5513	17354147	CHLNCDRAFT_135159	1114.17	615.206	0.552167	-0.856822	0.0016083	0.0129539	DOWN	NA	NA	NA	NA	NA	NA	NA	NA	NA
gene3385	17356106	CHLNCDRAFT_144190	272.776	136.357	0.499886	-1.00033	0.00156044	0.0126	DOWN	NA	NA	NA	NA	NA	NA	NA	NA	NA
gene6986	17352801	CHLNCDRAFT_25985	73.8331	23.472	0.317907	-1.65332	0.00150814	0.0122393	DOWN	NA	NA	NA	NA	NA	NA	NA	NA	NA
gene6548	17353178	CHLNCDRAFT_53648	20103.5	9221.87	0.458721	-1.12431	0.00149669	0.0121669	DOWN	NA	NA	NA	NA	NA	NA	NA	NA	NA
gene9263	17350325	CHLNCDRAFT_141667	238.594	114.118	0.478294	-1.06403	0.00149294	0.0121467	DOWN	NA	NA	NA	NA	NA	NA	NA	NA	NA
gene1225	17358693	CHLNCDRAFT_19034	217.55	101.428	0.46623	-1.10089	0.00148005	0.0120724	DOWN	NA	NA	NA	NA	NA	NA	NA	NA	NA
gene8019	17351514	CHLNCDRAFT_15492	569.145	314.592	0.552745	-0.855313	0.00144357	0.0118049	DOWN	NA	NA	NA	NA	NA	NA	NA	NA	NA
gene4025	17355903	CHLNCDRAFT_57668	5364.53	2549.08	0.475173	-1.07347	0.00143391	0.0117359	DOWN	NA	NA	NA	NA	NA	NA	NA	NA	NA
gene212	17359195	CHLNCDRAFT_29200	1373.4	737.599	0.53706	-0.896846	0.00142095	0.0116397	DOWN	NA	NA	NA	NA	NA	NA	NA	NA	NA
gene8444	17351217	CHLNCDRAFT_54894	1739.3	922.044	0.530125	-0.915596	0.00139697	0.011453	DOWN	NA	NA	NA	NA	NA	NA	NA	NA	NA
gene7634	17352046	CHLNCDRAFT_58834	511.129	280.231	0.54826	-0.867067	0.00139347	0.0114341	DOWN	NA	NA	NA	NA	NA	NA	NA	NA	NA
gene5210	17354527	CHLNCDRAFT_52757	1299.99	701.799	0.53985	-0.88937	0.0013913	0.011426	DOWN	NA	NA	NA	NA	NA	NA	NA	NA	NA
gene6666	17352953	CHLNCDRAFT_53733	1106.68	603.016	0.544887	-0.875972	0.00138517	0.0113934	DOWN	NA	NA	NA	NA	NA	NA	NA	NA	NA
gene4356	17355494	CHLNCDRAFT_57785	655.849	361.092	0.550572	-0.860997	0.00138253	0.0113831	DOWN	NA	NA	NA	NA	NA	NA	NA	NA	NA
gene9236	17350384	CHLNCDRAFT_141625	129.543	50.9252	0.393115	-1.34698	0.00136325	0.0113047	DOWN	NA	NA	NA	NA	NA	NA	NA	NA	NA
gene9384	17350238	CHLNCDRAFT_12348	1784.15	935.01	0.524065	-0.932181	0.00131487	0.0109288	DOWN	NA	NA	NA	NA	NA	NA	NA	NA	NA
gene5010	17354649	CHLNCDRAFT_35652	3493.25	1719.72	0.492299	-1.02239	0.00128069	0.0106725	DOWN	NA	NA	NA	NA	NA	NA	NA	NA	NA
gene7934	17351732	CHLNCDRAFT_54573	1490.71	792.088	0.53135	-0.912265	0.00125601	0.0105123	DOWN	NA	NA	NA	NA	NA	NA	NA	NA	NA
gene5557	17353890	CHLNCDRAFT_135216	2076.88	1070.93	0.515646	-0.955546	0.00123031	0.0103151	DOWN	NA	NA	NA	NA	NA	NA	NA	NA	NA
gene6581	17353034	CHLNCDRAFT_136603	576.201	316.62	0.549496	-0.863819	0.00121938	0.0102324	DOWN	NA	NA	NA	NA	NA	NA	NA	NA	NA
gene4877	17354754	CHLNCDRAFT_15699	356.4	185.064	0.519259	-0.945472	0.00121147	0.0101749	DOWN	NA	NA	NA	NA	NA	NA	NA	NA	NA
gene1129	17358431	CHLNCDRAFT_138128	705.243	386.679	0.548293	-0.866982	0.00120453	0.0101343	DOWN	NA	NA	NA	NA	NA	NA	NA	NA	NA
gene7796	17351890	CHLNCDRAFT_138948	135.696	52.5017	0.386907	-1.36994	0.00120331	0.0101328	DOWN	NA	NA	NA	NA	NA	NA	NA	NA	NA
gene8243	17351349	CHLNCDRAFT_139560	3027.05	1502.99	0.496521	-1.01007	0.001169	0.00987848	DOWN	NA	NA	NA	NA	NA	NA	NA	NA	NA
gene4496	17355178	CHLNCDRAFT_133811	312.262	157.675	0.504944	-0.985805	0.00115568	0.00978314	DOWN	NA	NA	NA	NA	NA	NA	NA	NA	NA
gene1841	17357555	CHLNCDRAFT_57007	1452.21	772.289	0.531802	-0.91104	0.0011517	0.00976664	DOWN	NA	NA	NA	NA	NA	NA	NA	NA	NA
gene6674	17353018	CHLNCDRAFT_136724	2511.52	1267.01	0.504479	-0.987133	0.00114324	0.00970339	DOWN	Uncharacterized_protein	Esi_0168_0072	Ectocarpus_siliculosus (Brown_alga) (Conferva_siliculosa)	NA	NA	NA	NA	NA	NA
gene9461	17350168	CHLNCDRAFT_33383	1197.12	642.083	0.536357	-0.898735	0.0011236	0.00957051	DOWN	NA	NA	NA	NA	NA	NA	NA	NA	NA
gene1558	17358311	CHLNCDRAFT_140653	1123.15	606.868	0.540328	-0.888094	0.00112208	0.00956598	DOWN	NA	NA	NA	NA	NA	NA	NA	NA	NA
gene4271	17355496	CHLNCDRAFT_145421	22.1072	3.56038	0.16105	-2.63442	0.00110893	0.0094791	DOWN	NA	NA	NA	NA	NA	NA	NA	NA	NA
gene9006	17350603	CHLNCDRAFT_141311	1800.82	939.193	0.521538	-0.939157	0.00109427	0.00937038	DOWN	NA	NA	NA	NA	NA	NA	NA	NA	NA
gene4939	17354797	CHLNCDRAFT_134391	419.897	220.06	0.524081	-0.932138	0.00108718	0.00932634	DOWN	NA	NA	NA	NA	NA	NA	NA	NA	NA
gene3330	17356341	CHLNCDRAFT_144124	517.2	278.294	0.538077	-0.894115	0.00108487	0.00931483	DOWN	NA	NA	NA	NA	NA	NA	NA	NA	NA
gene6506	17353208	CHLNCDRAFT_53616	910.025	494.068	0.542917	-0.881197	0.00107397	0.00923765	DOWN	NA	NA	NA	NA	NA	NA	NA	NA	NA
gene9331	17350270	CHLNCDRAFT_141754	595.46	323.403	0.543114	-0.880672	0.00107202	0.00923737	DOWN	NA	NA	NA	NA	NA	NA	NA	NA	NA
gene8223	17351336	CHLNCDRAFT_59064	975.715	528.354	0.541505	-0.884953	0.00106544	0.00919718	DOWN	NA	NA	NA	NA	NA	NA	NA	NA	NA
gene6709	17352887	CHLNCDRAFT_25788	548.749	294.31	0.536329	-0.898811	0.00105021	0.00908202	DOWN	NA	NA	NA	NA	NA	NA	NA	NA	NA
gene5861	17353592	CHLNCDRAFT_135624	3276.22	1600.97	0.488663	-1.03309	0.00103757	0.00899698	DOWN	NA	NA	NA	NA	NA	NA	NA	NA	NA
gene3568	17356052	CHLNCDRAFT_144423	599.865	324.416	0.540815	-0.886793	0.0010288	0.00892892	DOWN	NA	NA	NA	NA	NA	NA	NA	NA	NA
gene2226	17357767	CHLNCDRAFT_142362	688.156	374.62	0.544383	-0.877307	0.00101647	0.00884339	DOWN	NA	NA	NA	NA	NA	NA	NA	NA	NA
gene913	17358413	CHLNCDRAFT_137872	627.541	339.715	0.541343	-0.885386	0.00101035	0.00882452	DOWN	NA	NA	NA	NA	NA	NA	NA	NA	NA
gene923	17358403	CHLNCDRAFT_137883	561.22	302.535	0.539066	-0.891466	0.00100535	0.00880469	DOWN	NA	NA	NA	NA	NA	NA	NA	NA	NA
gene7737	17351807	CHLNCDRAFT_15720	390.999	203.749	0.521099	-0.940371	0.00099552	0.00873463	DOWN	NA	NA	NA	NA	NA	NA	NA	NA	NA
gene7570	17352055	CHLNCDRAFT_138664	356.219	183.885	0.516213	-0.953961	0.00099412	0.0087303	DOWN	NA	NA	NA	NA	NA	NA	NA	NA	NA
gene6575	17352924	CHLNCDRAFT_136597	1558.42	819.501	0.525854	-0.927267	0.000990402	0.00871355	DOWN	NA	NA	NA	NA	NA	NA	NA	NA	NA
gene2424	17357212	CHLNCDRAFT_142803	982.076	528.082	0.53772	-0.895074	0.000985958	0.00869712	DOWN	NA	NA	NA	NA	NA	NA	NA	NA	NA
gene9625	17349997	CHLNCDRAFT_59491	1655.75	862.093	0.520666	-0.941569	0.000986727	0.00869712	DOWN	NA	NA	NA	NA	NA	NA	NA	NA	NA
gene8671	17350954	CHLNCDRAFT_140152	844.259	455.79	0.53987	-0.889316	0.000981196	0.00867941	DOWN	NA	NA	NA	NA	NA	NA	NA	NA	NA
gene352	17359322	CHLNCDRAFT_56531	1006.86	543.269	0.539566	-0.890129	0.00097788	0.00866675	DOWN	NA	NA	NA	NA	NA	NA	NA	NA	NA
gene534	17359574	CHLNCDRAFT_49669	726.113	394.604	0.543447	-0.87979	0.000967763	0.00861301	DOWN	NA	NA	NA	NA	NA	NA	NA	NA	NA
gene2382	17356808	CHLNCDRAFT_57189	913.244	492.289	0.539055	-0.891495	0.000968385	0.00861301	DOWN	NA	NA	NA	NA	NA	NA	NA	NA	NA
gene3481	17356150	CHLNCDRAFT_21829	1339.18	711.836	0.531546	-0.911733	0.000969132	0.00861301	DOWN	NA	NA	NA	NA	NA	NA	NA	NA	NA
gene1680	17358079	CHLNCDRAFT_140797	1142.94	609.99	0.533701	-0.905897	0.000947177	0.00845694	DOWN	NA	NA	NA	NA	NA	NA	NA	NA	NA
gene6915	17352627	CHLNCDRAFT_137066	123.71	45.2041	0.365404	-1.45244	0.000927101	0.00830079	DOWN	NA	NA	NA	NA	NA	NA	NA	NA	NA
gene6898	17352809	CHLNCDRAFT_137046	504.977	268.573	0.531853	-0.910901	0.000913359	0.00821596	DOWN	NA	NA	NA	NA	NA	NA	NA	NA	NA
gene5984	17353563	CHLNCDRAFT_135768	68.7754	20.3097	0.295304	-1.75973	0.000898243	0.00811031	DOWN	NA	NA	NA	NA	NA	NA	NA	NA	NA
gene5488	17353937	CHLNCDRAFT_35894	759.424	408.825	0.538336	-0.89342	0.000896141	0.00809892	DOWN	NA	NA	NA	NA	NA	NA	NA	NA	NA
gene5880	17353694	CHLNCDRAFT_135646	54.2972	14.405	0.265298	-1.91431	0.000894733	0.0080938	DOWN	NA	NA	NA	NA	NA	NA	NA	NA	NA
gene4868	17354722	CHLNCDRAFT_57951	3297.56	1592.62	0.482969	-1.05	0.000892668	0.00809033	DOWN	NA	NA	NA	NA	NA	NA	NA	NA	NA
gene5729	17354123	CHLNCDRAFT_13697	1136.23	604.251	0.531802	-0.911039	0.000871292	0.00792645	DOWN	NA	NA	NA	NA	NA	NA	NA	NA	NA
gene1954	17357622	CHLNCDRAFT_142036	1485.29	776.738	0.522953	-0.935246	0.000863949	0.00787454	DOWN	NA	NA	NA	NA	NA	NA	NA	NA	NA
gene4968	17354666	PDC2	481.662	256.12	0.531742	-0.911202	0.000859551	0.00784187	DOWN	NA	NA	NA	NA	NA	NA	NA	NA	NA
gene1900	17357741	CHLNCDRAFT_141975	121.559	44.0845	0.362659	-1.46331	0.000845109	0.00773429	DOWN	NA	NA	NA	NA	NA	NA	NA	NA	NA
gene4276	17355491	CHLNCDRAFT_145427	239.009	109.8	0.459397	-1.12219	0.000843774	0.00773429	DOWN	NA	NA	NA	NA	NA	NA	NA	NA	NA
gene9086	17350494	CHLNCDRAFT_141417	1030.9	550.466	0.533966	-0.90518	0.000840244	0.00771694	DOWN	NA	NA	NA	NA	NA	NA	NA	NA	NA
gene2227	17357763	CHLNCDRAFT_9763	750.285	401.846	0.535591	-0.900797	0.000832047	0.00764895	DOWN	NA	NA	NA	NA	NA	NA	NA	NA	NA
gene7825	17351972	CHLNCDRAFT_58886	3091.35	1505.78	0.487093	-1.03773	0.000830784	0.00764464	DOWN	NA	NA	NA	NA	NA	NA	NA	NA	NA
gene5428	17354402	CHLNCDRAFT_135019	355.429	180.605	0.508133	-0.976722	0.000819522	0.00754823	DOWN	NA	NA	NA	NA	NA	NA	NA	NA	NA
gene8610	17351012	CHLNCDRAFT_140044	1213.6	643.801	0.53049	-0.914604	0.000816444	0.00752708	DOWN	NA	NA	NA	NA	NA	NA	NA	NA	NA
gene1060	17358858	CHLNCDRAFT_138045	405.616	209.473	0.516431	-0.953352	0.000812239	0.00750269	DOWN	NA	NA	NA	NA	NA	NA	NA	NA	NA
gene3803	17355557	CHLNCDRAFT_144806	9.16919	0.372521	0.0406274	-4.6214	0.000802193	0.00742414	DOWN	NA	NA	NA	NA	NA	NA	NA	NA	NA
gene8709	17350898	CHLNCDRAFT_140195	7185.96	3208.33	0.446472	-1.16336	0.000763861	0.00709668	DOWN	Uncharacterized_protein	Esi_0058_0008	Ectocarpus_siliculosus (Brown_alga) (Conferva_siliculosa)	NA	NA	NA	NA	NA	NA
gene3116	17356392	CHLNCDRAFT_143781	45.0963	10.0419	0.222677	-2.16698	0.000761582	0.00708234	DOWN	NA	NA	NA	NA	NA	NA	NA	NA	NA
gene2729	17357156	CHLNCDRAFT_143182	10329	4526.05	0.438189	-1.19037	0.000738526	0.0068879	DOWN	NA	NA	NA	NA	NA	NA	NA	NA	NA
gene6320	17353364	CHLNCDRAFT_136216	6114.45	2741.7	0.448397	-1.15715	0.000722638	0.00674976	DOWN	NA	NA	NA	NA	NA	NA	NA	NA	NA
gene3191	17356408	CHLNCDRAFT_143875	1219.79	638.895	0.523776	-0.932978	0.000694243	0.00651911	DOWN	NA	NA	NA	NA	NA	NA	NA	NA	NA
gene3685	17356199	CHLNCDRAFT_51699	2516.29	1237	0.491597	-1.02445	0.000677374	0.00639189	DOWN	NA	NA	NA	NA	NA	NA	NA	NA	NA
gene1064	17358645	CHLNCDRAFT_138050	3147.76	1506.77	0.478679	-1.06287	0.000675855	0.00638905	DOWN	NA	NA	NA	NA	NA	NA	NA	NA	NA
gene2913	17356514	CHLNCDRAFT_57366	211.153	92.784	0.439416	-1.18634	0.00067641	0.00638905	DOWN	NA	NA	NA	NA	NA	NA	NA	NA	NA
gene9327	17350246	CHLNCDRAFT_141748	978.097	516.788	0.528361	-0.920405	0.000672432	0.00637023	DOWN	NA	NA	NA	NA	NA	NA	NA	NA	NA
gene7564	17351992	CHLNCDRAFT_54331	1770.31	892.439	0.504114	-0.988178	0.000661276	0.0062831	DOWN	NA	NA	NA	NA	NA	NA	NA	NA	NA
gene399	17359393	CHLNCDRAFT_133374	794.107	420.246	0.529206	-0.918098	0.000653911	0.00623158	DOWN	NA	NA	NA	NA	NA	NA	NA	NA	NA
gene285	17359595	CHLNCDRAFT_133222	187.671	78.6967	0.419333	-1.25383	0.000641596	0.00613555	DOWN	NA	NA	NA	NA	NA	NA	NA	NA	NA
gene6569	17353080	CHLNCDRAFT_136571	1239.39	646.738	0.521821	-0.938372	0.000642356	0.00613555	DOWN	NA	NA	NA	NA	NA	NA	NA	NA	NA
gene6767	17352849	CHLNCDRAFT_136853	817.018	431.206	0.52778	-0.921991	0.000641249	0.00613555	DOWN	NA	NA	NA	NA	NA	NA	NA	NA	NA
gene6729	17352900	CHLNCDRAFT_58548	4090.94	1892.47	0.462599	-1.11217	0.000632634	0.00608756	DOWN	NA	NA	NA	NA	NA	NA	NA	NA	NA
gene7260	17352481	CHLNCDRAFT_137515	1102	577.244	0.523816	-0.932867	0.000633107	0.00608756	DOWN	NA	NA	NA	NA	NA	NA	NA	NA	NA
gene4330	17355284	CHLNCDRAFT_145496	819.155	429.893	0.524801	-0.930157	0.000613561	0.00592329	DOWN	NA	NA	NA	NA	NA	NA	NA	NA	NA
gene1456	17357868	CHLNCDRAFT_140524	708	374.02	0.528277	-0.920634	0.000602055	0.0058239	DOWN	NA	NA	NA	NA	NA	NA	NA	NA	NA
gene3778	17355672	CHLNCDRAFT_144771	660.931	347.584	0.5259	-0.92714	0.000594961	0.00576107	DOWN	Uncharacterized_protein	Esi_0131_0061	Ectocarpus_siliculosus (Brown_alga) (Conferva_siliculosa)	NA	NA	NA	NA	NA	NA
gene7120	17352518	CHLNCDRAFT_137340	5995.26	2664.9	0.444501	-1.16974	0.000586376	0.00569513	DOWN	NA	NA	NA	NA	NA	NA	NA	NA	NA
gene8138	17351586	CHLNCDRAFT_139415	3336.69	1569.87	0.470486	-1.08778	0.00057314	0.00558348	DOWN	NA	NA	NA	NA	NA	NA	NA	NA	NA
gene5555	17354165	CHLNCDRAFT_135214	84.9567	25.1779	0.296361	-1.75457	0.000524095	0.0051293	DOWN	NA	NA	NA	NA	NA	NA	NA	NA	NA
gene2946	17356638	CHLNCDRAFT_143545	736.01	383.558	0.521132	-0.940279	0.000522118	0.0051175	DOWN	NA	NA	NA	NA	NA	NA	NA	NA	NA
gene7121	17352478	CHLNCDRAFT_137341	6467.38	2837.57	0.438751	-1.18852	0.000519532	0.00509734	DOWN	NA	NA	NA	NA	NA	NA	NA	NA	NA
gene1389	17357838	CHLNCDRAFT_19853	122.105	41.7248	0.341712	-1.54915	0.000512576	0.00503937	DOWN	NA	NA	NA	NA	NA	NA	NA	NA	NA
gene5459	17353930	CHLNCDRAFT_135078	25.3639	3.80827	0.150145	-2.73557	0.000508637	0.00500575	DOWN	NA	NA	NA	NA	NA	NA	NA	NA	NA
gene3038	17356688	CHLNCDRAFT_143670	1617.18	815.022	0.503976	-0.988573	0.000492104	0.00485795	DOWN	NA	NA	NA	NA	NA	NA	NA	NA	NA
gene9342	17350273	CHLNCDRAFT_141766	2063.3	1010.85	0.489922	-1.02938	0.000491004	0.00485207	DOWN	NA	NA	NA	NA	NA	NA	NA	NA	NA
gene1614	17357883	CHLNCDRAFT_140717	907.221	470.056	0.518127	-0.948622	0.000490455	0.00485163	DOWN	NA	NA	NA	NA	NA	NA	NA	NA	NA
gene4235	17355325	CHLNCDRAFT_52073	505.288	260.381	0.515313	-0.95648	0.000484419	0.00479824	DOWN	NA	NA	NA	NA	NA	NA	NA	NA	NA
gene5363	17354289	CHLNCDRAFT_58100	3797.12	1747.43	0.4602	-1.11967	0.00048456	0.00479824	DOWN	NA	NA	NA	NA	NA	NA	NA	NA	NA
gene5091	17354424	CHLNCDRAFT_134637	1026.55	532.279	0.518513	-0.947549	0.000452601	0.00452836	DOWN	NA	NA	NA	NA	NA	NA	NA	NA	NA
gene8484	17351089	CHLNCDRAFT_139877	489.903	251.827	0.514034	-0.960064	0.000424482	0.00428264	DOWN	NA	NA	NA	NA	NA	NA	NA	NA	NA
gene4653	17354942	CHLNCDRAFT_134006	798.254	413.899	0.518506	-0.947567	0.000422173	0.00426381	DOWN	NA	NA	NA	NA	NA	NA	NA	NA	NA
gene1551	17358077	CHLNCDRAFT_140644	508.765	257.983	0.507076	-0.979725	0.000405069	0.00411264	DOWN	NA	NA	NA	NA	NA	NA	NA	NA	NA
gene5501	17354020	CHLNCDRAFT_135146	262.583	117.32	0.446791	-1.16233	0.000404863	0.00411264	DOWN	NA	NA	NA	NA	NA	NA	NA	NA	NA
gene4958	17354691	CHLNCDRAFT_134422	417.623	208.823	0.500028	-0.99992	0.000393865	0.00402437	DOWN	NA	NA	NA	NA	NA	NA	NA	NA	NA
gene5389	17354442	CHLNCDRAFT_134976	1147.91	586.201	0.51067	-0.969538	0.000391751	0.00400702	DOWN	NA	NA	NA	NA	NA	NA	NA	NA	NA
gene5916	17353823	CHLNCDRAFT_135686	58.7818	13.7658	0.234184	-2.09429	0.000380966	0.00390917	DOWN	NA	NA	NA	NA	NA	NA	NA	NA	NA
gene517	17359492	CHLNCDRAFT_56596	3349.48	1535.07	0.458301	-1.12563	0.000371223	0.00381325	DOWN	NA	NA	NA	NA	NA	NA	NA	NA	NA
gene6394	17353237	CHLNCDRAFT_136330	549.536	280.975	0.511295	-0.967772	0.000369573	0.00380036	DOWN	NA	NA	NA	NA	NA	NA	NA	NA	NA
gene3483	17356217	CHLNCDRAFT_57509	467.825	234.791	0.501877	-0.994594	0.000369117	0.00380017	DOWN	NA	NA	NA	NA	NA	NA	NA	NA	NA
gene4239	17355387	CHLNCDRAFT_145384	549.143	279.858	0.509626	-0.972489	0.000362888	0.00374764	DOWN	NA	NA	NA	NA	NA	NA	NA	NA	NA
gene1584	17358060	CHLNCDRAFT_34160	2651.82	1245.17	0.469553	-1.09064	0.000362491	0.00374756	DOWN	NA	NA	NA	NA	NA	NA	NA	NA	NA
gene9359	17350250	CHLNCDRAFT_9947	774.383	395.886	0.511227	-0.967963	0.000352799	0.00365915	DOWN	NA	NA	NA	NA	NA	NA	NA	NA	NA
gene7005	17352644	CHLNCDRAFT_32279	586.704	297.754	0.507503	-0.978513	0.000347595	0.00360906	DOWN	NA	NA	NA	NA	NA	NA	NA	NA	NA
gene936	17358536	CHLNCDRAFT_137896	272.606	122.123	0.447984	-1.15848	0.000345917	0.00359552	DOWN	NA	NA	NA	NA	NA	NA	NA	NA	NA
gene2851	17356893	CHLNCDRAFT_143339	307.401	144.327	0.469508	-1.09078	0.000339953	0.00353735	DOWN	NA	NA	NA	NA	NA	NA	NA	NA	NA
gene6554	17353181	CHLNCDRAFT_8957	432.025	214.455	0.496394	-1.01044	0.000335568	0.00349929	DOWN	NA	NA	NA	NA	NA	NA	NA	NA	NA
gene6695	17353002	CHLNCDRAFT_136751	1510.46	747.375	0.4948	-1.01508	0.000333731	0.00348769	DOWN	NA	NA	NA	NA	NA	NA	NA	NA	NA
gene1090	17358977	CHLNCDRAFT_138082	14421.4	5958.21	0.41315	-1.27526	0.000330076	0.00345324	DOWN	NA	NA	NA	NA	NA	NA	NA	NA	NA
gene3696	17356229	CHLNCDRAFT_51708	264.128	117.174	0.443626	-1.17259	0.000327394	0.0034289	DOWN	NA	NA	NA	NA	NA	NA	NA	NA	NA
gene6796	17352605	CHLNCDRAFT_136916	1566.47	775.67	0.49517	-1.014	0.000323737	0.00340171	DOWN	NA	NA	NA	NA	NA	NA	NA	NA	NA
gene2392	17357053	CHLNCDRAFT_142762	2600.86	1216.12	0.467583	-1.09671	0.000317103	0.00333564	DOWN	NA	NA	NA	NA	NA	NA	NA	NA	NA
gene7682	17351943	CHLNCDRAFT_138816	3633.91	1635.96	0.450193	-1.15139	0.000310383	0.00326853	DOWN	NA	NA	NA	NA	NA	NA	NA	NA	NA
gene3350	17355994	CHLNCDRAFT_144148	1496.63	740.331	0.494667	-1.01547	0.000308148	0.00324855	DOWN	NA	NA	NA	NA	NA	NA	NA	NA	NA
gene2389	17356841	CHLNCDRAFT_142759	850.896	434.497	0.510634	-0.969638	0.000302476	0.00319225	DOWN	NA	NA	NA	NA	NA	NA	NA	NA	NA
gene2652	17356796	CHLNCDRAFT_143088	724.492	367.918	0.507829	-0.977586	0.000287055	0.00306649	DOWN	NA	NA	NA	NA	NA	NA	NA	NA	NA
gene5733	17354114	CHLNCDRAFT_135445	2212.94	1051.13	0.474993	-1.07402	0.000285848	0.00305699	DOWN	NA	NA	NA	NA	NA	NA	NA	NA	NA
gene344	17359000	CHLNCDRAFT_133293	1122.36	566.463	0.504708	-0.98648	0.00028427	0.00304349	DOWN	NA	NA	NA	NA	NA	NA	NA	NA	NA
gene5616	17354045	CHLNCDRAFT_135293	763.841	388.135	0.508135	-0.976716	0.000279864	0.003003	DOWN	NA	NA	NA	NA	NA	NA	NA	NA	NA
gene485	17359316	CHLNCDRAFT_18725	1473.36	727.771	0.493953	-1.01756	0.000275857	0.00296331	DOWN	NA	NA	NA	NA	NA	NA	NA	NA	NA
gene6988	17352773	CHLNCDRAFT_137149	3446.57	1549.06	0.44945	-1.15377	0.000272465	0.00293014	DOWN	NA	NA	NA	NA	NA	NA	NA	NA	NA
gene519	17359564	CHLNCDRAFT_133541	1162.03	581.11	0.500083	-0.99976	0.000266571	0.00287963	DOWN	NA	NA	NA	NA	NA	NA	NA	NA	NA
gene7667	17351825	CHLNCDRAFT_138797	3743.89	1659.32	0.443208	-1.17394	0.000264067	0.00285579	DOWN	NA	NA	NA	NA	NA	NA	NA	NA	NA
gene5402	17354315	CHLNCDRAFT_52869	1045.32	525.64	0.502849	-0.991802	0.000263396	0.00285173	DOWN	NA	NA	NA	NA	NA	NA	NA	NA	NA
gene6953	17352607	CHLNCDRAFT_137108	704.482	356.124	0.505512	-0.984182	0.000252432	0.00273919	DOWN	Uncharacterized_protein	Esi_0078_0020	Ectocarpus_siliculosus (Brown_alga) (Conferva_siliculosa)	NA	NA	NA	NA	NA	NA
gene1173	17358933	CHLNCDRAFT_138177	40.0864	7.25206	0.18091	-2.46665	0.000243903	0.00266324	DOWN	NA	NA	NA	NA	NA	NA	NA	NA	NA
gene7385	17352202	CHLNCDRAFT_138396	718.792	363.648	0.505916	-0.98303	0.00024025	0.00263372	DOWN	NA	NA	NA	NA	NA	NA	NA	NA	NA
gene975	17358784	CHLNCDRAFT_137940	429.63	207.83	0.483742	-1.04769	0.000217505	0.00241742	DOWN	NA	NA	NA	NA	NA	NA	NA	NA	NA
gene6374	17353190	CHLNCDRAFT_136308	596.882	298.489	0.50008	-0.999769	0.000215523	0.00239816	DOWN	NA	NA	NA	NA	NA	NA	NA	NA	NA
gene5730	17353963	CHLNCDRAFT_135442	2356.43	1093.95	0.46424	-1.10706	0.000202376	0.00225709	DOWN	NA	NA	NA	NA	NA	NA	NA	NA	NA
gene2106	17357709	CHLNCDRAFT_57093	2157.57	1004.92	0.465764	-1.10233	0.000200337	0.00223953	DOWN	NA	NA	NA	NA	NA	NA	NA	NA	NA
gene3945	17355830	CHLNCDRAFT_144991	630.807	315.676	0.500431	-0.998756	0.000200133	0.00223953	DOWN	NA	NA	NA	NA	NA	NA	NA	NA	NA
gene2930	17356541	CHLNCDRAFT_57371	424.9	204.474	0.481229	-1.05521	0.000192469	0.00216921	DOWN	NA	NA	NA	NA	NA	NA	NA	NA	NA
gene6828	17352748	CHLNCDRAFT_58591	1453.74	705.24	0.48512	-1.04359	0.000189115	0.00214145	DOWN	Uncharacterized_protein	Esi_0034_0055	Ectocarpus_siliculosus (Brown_alga) (Conferva_siliculosa)	NA	NA	NA	NA	NA	NA
gene7142	17352507	CHLNCDRAFT_137366	752.151	374.535	0.497952	-1.00592	0.000172728	0.00197918	DOWN	NA	NA	NA	NA	NA	NA	NA	NA	NA
gene342	17358998	CHLNCDRAFT_133291	507.539	247.716	0.488073	-1.03483	0.000171869	0.00197167	DOWN	NA	NA	NA	NA	NA	NA	NA	NA	NA
gene6083	17353515	CHLNCDRAFT_135913	1270.68	618.39	0.486659	-1.03902	0.000160311	0.00185011	DOWN	NA	NA	NA	NA	NA	NA	NA	NA	NA
gene9339	17350302	CHLNCDRAFT_59404	2750.25	1232.84	0.448266	-1.15757	0.000159368	0.00184143	DOWN	NA	NA	NA	NA	NA	NA	NA	NA	NA
gene4423	17355370	CHLNCDRAFT_145630	852.275	421.176	0.494178	-1.0169	0.000154563	0.00179237	DOWN	NA	NA	NA	NA	NA	NA	NA	NA	NA
gene2351	17357082	CHLNCDRAFT_50857	468.933	224.51	0.478768	-1.0626	0.000149856	0.00174409	DOWN	NA	NA	NA	NA	NA	NA	NA	NA	NA
gene7462	17352291	CHLNCDRAFT_26326	873.679	428.232	0.490148	-1.02871	0.000147754	0.0017238	DOWN	NA	NA	NA	NA	NA	NA	NA	NA	NA
gene2201	17357805	CHLNCDRAFT_142328	2928.81	1296.9	0.442809	-1.17524	0.000146624	0.00171269	DOWN	Uncharacterized_protein	Esi_0036_0121	Ectocarpus_siliculosus (Brown_alga) (Conferva_siliculosa)	NA	NA	NA	NA	NA	NA
gene8241	17351361	CHLNCDRAFT_139557	497.233	239.405	0.481474	-1.05447	0.000143017	0.00167462	DOWN	NA	NA	NA	NA	NA	NA	NA	NA	NA
gene172	17359211	CHLNCDRAFT_133082	341.487	153.884	0.450631	-1.14998	0.00013992	0.00164236	DOWN	NA	NA	NA	NA	NA	NA	NA	NA	NA
gene2416	17357140	CHLNCDRAFT_50899	1210.37	586.348	0.484438	-1.04561	0.000139224	0.00163618	DOWN	NA	NA	NA	NA	NA	NA	NA	NA	NA
gene2885	17356543	CHLNCDRAFT_143466	2276.2	1036.7	0.455451	-1.13463	0.000138036	0.0016242	DOWN	NA	NA	NA	NA	NA	NA	NA	NA	NA
gene8636	17351030	CHLNCDRAFT_140076	2872.76	1267.29	0.441139	-1.1807	0.000136556	0.00160875	DOWN	NA	NA	NA	NA	NA	NA	NA	NA	NA
gene2184	17357768	CHLNCDRAFT_142306	2289.44	1038.96	0.453803	-1.13986	0.00013592	0.00160323	DOWN	NA	NA	NA	NA	NA	NA	NA	NA	NA
gene1716	17358351	CHLNCDRAFT_140843	538.6	260.483	0.48363	-1.04802	0.000134405	0.00158925	DOWN	NA	NA	NA	NA	NA	NA	NA	NA	NA
gene7029	17352599	CHLNCDRAFT_137198	586.722	286.085	0.487598	-1.03624	0.00013297	0.00157616	DOWN	NA	NA	NA	NA	NA	NA	NA	NA	NA
gene2439	17356838	CHLNCDRAFT_142819	1125.54	546.401	0.485456	-1.04259	0.000132504	0.00157257	DOWN	NA	NA	NA	NA	NA	NA	NA	NA	NA
gene2843	17357043	CHLNCDRAFT_51181	1710.88	799.313	0.467194	-1.09791	0.000129558	0.00154022	DOWN	NA	NA	NA	NA	NA	NA	NA	NA	NA
gene4484	17355098	CHLNCDRAFT_133796	1340.81	640.233	0.477497	-1.06644	0.000129529	0.00154022	DOWN	NA	NA	NA	NA	NA	NA	NA	NA	NA
gene5685	17353997	CHLNCDRAFT_13257	106.523	29.9127	0.280809	-1.83234	0.000121199	0.00145635	DOWN	NA	NA	NA	NA	NA	NA	NA	NA	NA
gene1814	17358198	CHLNCDRAFT_50500	196.86	75.9292	0.385702	-1.37444	0.000115467	0.00140324	DOWN	NA	NA	NA	NA	NA	NA	NA	NA	NA
gene8474	17351158	CHLNCDRAFT_54915	4861.14	2005.06	0.412468	-1.27765	0.000114654	0.00139867	DOWN	NA	NA	NA	NA	NA	NA	NA	NA	NA
gene4113	17355216	CHLNCDRAFT_145218	667.835	324.341	0.48566	-1.04198	0.000110831	0.00135718	DOWN	NA	NA	NA	NA	NA	NA	NA	NA	NA
gene760	17358585	CHLNCDRAFT_49837	203.424	75.8585	0.372909	-1.42311	0.000108461	0.00133325	DOWN	NA	NA	NA	NA	NA	NA	NA	NA	NA
gene3046	17356535	CHLNCDRAFT_143679	586.791	282.489	0.481413	-1.05465	0.000104768	0.00129281	DOWN	NA	NA	NA	NA	NA	NA	NA	NA	NA
gene6440	17353078	CHLNCDRAFT_136393	895.546	431.266	0.481568	-1.05419	0.00010192	0.00126415	DOWN	NA	NA	NA	NA	NA	NA	NA	NA	NA
gene3834	17355768	CHLNCDRAFT_144843	3396.1	1450.51	0.427112	-1.22731	0.000101006	0.00125572	DOWN	NA	NA	NA	NA	NA	NA	NA	NA	NA
gene6530	17353159	CHLNCDRAFT_136520	962.071	461.469	0.479662	-1.05991	9.84602e-05	0.00122756	DOWN	NA	NA	NA	NA	NA	NA	NA	NA	NA
gene4791	17354570	CHLNCDRAFT_134195	1378.68	647.666	0.469772	-1.08997	9.52383e-05	0.00119203	DOWN	NA	NA	NA	NA	NA	NA	NA	NA	NA
gene472	17359527	CHLNCDRAFT_133472	513.534	242.965	0.473123	-1.07971	9.33227e-05	0.0011711	DOWN	NA	NA	NA	NA	NA	NA	NA	NA	NA
gene2826	17357038	CHLNCDRAFT_143307	1045.33	499.66	0.477995	-1.06493	9.25338e-05	0.00116423	DOWN	NA	NA	NA	NA	NA	NA	NA	NA	NA
gene1327	17358221	CHLNCDRAFT_140370	2487.24	1094.66	0.440111	-1.18406	8.94711e-05	0.00113078	DOWN	NA	NA	NA	NA	NA	NA	NA	NA	NA
gene7759	17351830	CHLNCDRAFT_26868	222.182	84.7675	0.381522	-1.39016	7.94707e-05	0.00101716	DOWN	NA	NA	NA	NA	NA	NA	NA	NA	NA
gene2073	17357696	CHLNCDRAFT_142175	4160.97	1713.63	0.411834	-1.27987	7.82688e-05	0.00100445	DOWN	NA	NA	NA	NA	NA	NA	NA	NA	NA
gene6163	17353353	CHLNCDRAFT_136024	484.966	227.322	0.468737	-1.09315	7.81582e-05	0.00100437	DOWN	NA	NA	NA	NA	NA	NA	NA	NA	NA
gene665	17358768	CHLNCDRAFT_19238	4003.48	1653.95	0.413129	-1.27534	7.75395e-05	0.000997751	DOWN	NA	NA	NA	NA	NA	NA	NA	NA	NA
gene7384	17352277	CHLNCDRAFT_138395	200.078	72.5393	0.362555	-1.46373	7.75263e-05	0.000997751	DOWN	NA	NA	NA	NA	NA	NA	NA	NA	NA
gene5667	17353936	CHLNCDRAFT_135361	1088.23	514.979	0.473226	-1.0794	7.59782e-05	0.00098424	DOWN	NA	NA	NA	NA	NA	NA	NA	NA	NA
gene4992	17354764	CHLNCDRAFT_134472	285.323	118.939	0.416856	-1.26238	7.54968e-05	0.000981907	DOWN	NA	NA	NA	NA	NA	NA	NA	NA	NA
gene5258	17354523	CHLNCDRAFT_52783	448.75	208.041	0.4636	-1.10905	7.34619e-05	0.00095809	DOWN	NA	NA	NA	NA	NA	NA	NA	NA	NA
gene4964	17354751	CHLNCDRAFT_134430	657.673	308.873	0.469646	-1.09036	6.65625e-05	0.00087403	DOWN	NA	NA	NA	NA	NA	NA	NA	NA	NA
gene303	17359602	CHLNCDRAFT_133246	7497.03	2858.63	0.381301	-1.391	6.60505e-05	0.000868492	DOWN	NA	NA	NA	NA	NA	NA	NA	NA	NA
gene6620	17352944	CHLNCDRAFT_136664	365.035	160.824	0.440572	-1.18255	6.35884e-05	0.000837261	DOWN	NA	NA	NA	NA	NA	NA	NA	NA	NA
gene4630	17354960	CHLNCDRAFT_133977	1406.33	648.414	0.46107	-1.11694	6.202e-05	0.00081773	DOWN	NA	NA	NA	NA	NA	NA	NA	NA	NA
gene4664	17354894	CHLNCDRAFT_134020	1689.78	763.357	0.451749	-1.14641	6.18115e-05	0.000816098	DOWN	NA	NA	NA	NA	NA	NA	NA	NA	NA
gene4912	17354781	CHLNCDRAFT_52541	465.139	213.315	0.458605	-1.12468	6.14257e-05	0.000812118	DOWN	NA	NA	NA	NA	NA	NA	NA	NA	NA
gene8595	17350979	CHLNCDRAFT_140027	948.267	443.165	0.467342	-1.09745	6.10637e-05	0.000808443	DOWN	NA	NA	NA	NA	NA	NA	NA	NA	NA
gene8260	17351367	CHLNCDRAFT_139582	745.207	350.961	0.470958	-1.08633	6.04221e-05	0.00080105	DOWN	NA	NA	NA	NA	NA	NA	NA	NA	NA
gene6927	17352784	CHLNCDRAFT_137078	373.139	165.377	0.443205	-1.17395	5.89884e-05	0.000784203	DOWN	NA	NA	NA	NA	NA	NA	NA	NA	NA
gene3198	17356395	CHLNCDRAFT_57436	12854	4758.52	0.370198	-1.43363	5.86704e-05	0.000781055	DOWN	NA	NA	NA	NA	NA	NA	NA	NA	NA
gene8932	17350737	CHLNCDRAFT_141230	3229.38	1349.27	0.417812	-1.25907	5.74789e-05	0.00076838	DOWN	NA	NA	NA	NA	NA	NA	NA	NA	NA
gene3907	17355572	CHLNCDRAFT_144938	1159.05	540.011	0.46591	-1.10188	5.60999e-05	0.000752201	DOWN	NA	NA	NA	NA	NA	NA	NA	NA	NA
gene3495	17355972	CHLNCDRAFT_144329	397.125	176.016	0.443227	-1.17388	5.53071e-05	0.000744518	DOWN	NA	NA	NA	NA	NA	NA	NA	NA	NA
gene4997	17354852	CHLNCDRAFT_134477	13.6572	0.372521	0.0272764	-5.1962	5.40915e-05	0.000729175	DOWN	NA	NA	NA	NA	NA	NA	NA	NA	NA
gene8015	17351486	CHLNCDRAFT_58975	2604.61	1107.18	0.425085	-1.23418	5.02617e-05	0.000685226	DOWN	NA	NA	NA	NA	NA	NA	NA	NA	NA
gene3988	17355913	CHLNCDRAFT_145046	445.443	200.562	0.450253	-1.15119	4.90143e-05	0.00067107	DOWN	NA	NA	NA	NA	NA	NA	NA	NA	NA
gene5503	17353941	CHLNCDRAFT_135148	501.022	227.922	0.454914	-1.13633	4.82657e-05	0.000661762	DOWN	NA	NA	NA	NA	NA	NA	NA	NA	NA
gene4735	17355060	CHLNCDRAFT_134105	678.879	316.791	0.466638	-1.09962	4.62648e-05	0.000639796	DOWN	NA	NA	NA	NA	NA	NA	NA	NA	NA
gene3960	17355743	CHLNCDRAFT_145007	527.246	240.47	0.456088	-1.13262	4.57386e-05	0.00063343	DOWN	NA	NA	NA	NA	NA	NA	NA	NA	NA
gene7265	17352388	CHLNCDRAFT_137521	49.1952	7.84835	0.159535	-2.64806	4.31073e-05	0.00059785	DOWN	NA	NA	NA	NA	NA	NA	NA	NA	NA
gene1659	17358379	CHLNCDRAFT_56945	1096.17	507.111	0.462621	-1.1121	4.29298e-05	0.000596248	DOWN	NA	NA	NA	NA	NA	NA	NA	NA	NA
gene871	17358486	CHLNCDRAFT_137826	1655.84	738.089	0.44575	-1.16569	4.14613e-05	0.000578356	DOWN	NA	NA	NA	NA	NA	NA	NA	NA	NA
gene1388	17357875	CHLNCDRAFT_140444	1658.57	737.576	0.444705	-1.16908	4.10077e-05	0.000572858	DOWN	NA	NA	NA	NA	NA	NA	NA	NA	NA
gene4633	17355165	CHLNCDRAFT_11965	787.553	365.41	0.463981	-1.10786	3.94381e-05	0.000552535	DOWN	NA	NA	NA	NA	NA	NA	NA	NA	NA
gene1914	17357336	CHLNCDRAFT_141991	191.464	65.8796	0.344083	-1.53917	3.91205e-05	0.000549686	DOWN	NA	NA	NA	NA	NA	NA	NA	NA	NA
gene9498	17350131	CHLNCDRAFT_142620	964.725	443.527	0.459745	-1.1211	3.72739e-05	0.000526816	DOWN	NA	NA	NA	NA	NA	NA	NA	NA	NA
gene38	17359147	CHLNCDRAFT_56435	625.061	287.044	0.459226	-1.12273	3.61938e-05	0.000513057	DOWN	NA	NA	NA	NA	NA	NA	NA	NA	NA
gene3782	17355698	CHLNCDRAFT_144775	4664.44	1808.71	0.387765	-1.36674	3.42951e-05	0.000489748	DOWN	NA	NA	NA	NA	NA	NA	NA	NA	NA
gene7275	17352193	CHLNCDRAFT_138260	328.369	135.275	0.411959	-1.27943	3.41192e-05	0.000487961	DOWN	NA	NA	NA	NA	NA	NA	NA	NA	NA
gene5674	17354040	CHLNCDRAFT_10179	924.188	423.488	0.458227	-1.12587	3.35887e-05	0.000481805	DOWN	NA	NA	NA	NA	NA	NA	NA	NA	NA
gene1336	17358235	CHLNCDRAFT_11200	561.502	253.752	0.451917	-1.14587	3.18001e-05	0.000458197	DOWN	NA	NA	NA	NA	NA	NA	NA	NA	NA
gene2388	17357111	CHLNCDRAFT_142758	852.691	390.589	0.458067	-1.12637	2.80906e-05	0.000409654	DOWN	NA	NA	NA	NA	NA	NA	NA	NA	NA
gene7305	17352312	CHLNCDRAFT_54149	2463.96	1031.59	0.418671	-1.25611	2.79212e-05	0.000407802	DOWN	NA	NA	NA	NA	NA	NA	NA	NA	NA
gene4708	17355073	CHLNCDRAFT_134070	702.162	319.388	0.454864	-1.13649	2.77945e-05	0.000406568	DOWN	NA	NA	NA	NA	NA	NA	NA	NA	NA
gene8240	17351360	CHLNCDRAFT_27385	1147.15	516.09	0.449889	-1.15236	2.76954e-05	0.000405735	DOWN	NA	NA	NA	NA	NA	NA	NA	NA	NA
gene4367	17355363	CHLNCDRAFT_145542	53.4255	8.38635	0.156973	-2.67141	2.73046e-05	0.000401845	DOWN	NA	NA	NA	NA	NA	NA	NA	NA	NA
gene1839	17357680	CHLNCDRAFT_57005	1632.93	710.919	0.435365	-1.1997	2.67845e-05	0.000396007	DOWN	NA	NA	NA	NA	NA	NA	NA	NA	NA
gene8009	17351598	CHLNCDRAFT_139248	836.988	379.951	0.45395	-1.1394	2.60164e-05	0.000385836	DOWN	NA	NA	NA	NA	NA	NA	NA	NA	NA
gene2711	17356906	CHLNCDRAFT_143157	1260.73	563.719	0.447137	-1.16121	2.57755e-05	0.000382853	DOWN	NA	NA	NA	NA	NA	NA	NA	NA	NA
gene1765	17357955	CHLNCDRAFT_50471	133.897	36.941	0.275891	-1.85783	2.53307e-05	0.000377041	DOWN	NA	NA	NA	NA	NA	NA	NA	NA	NA
gene9525	17350097	CHLNCDRAFT_143411	699.772	313.273	0.447678	-1.15947	2.42026e-05	0.000363416	DOWN	NA	NA	NA	NA	NA	NA	NA	NA	NA
gene7878	17351704	CHLNCDRAFT_139068	1813.77	778.556	0.429246	-1.22012	2.38698e-05	0.00035898	DOWN	NA	NA	NA	NA	NA	NA	NA	NA	NA
gene6872	17352719	CHLNCDRAFT_137007	1821.79	777.371	0.426708	-1.22868	2.34735e-05	0.000354127	DOWN	NA	NA	NA	NA	NA	NA	NA	NA	NA
gene997	17358872	CHLNCDRAFT_137966	1151.79	517.084	0.448938	-1.15541	2.32241e-05	0.000351466	DOWN	NA	NA	NA	NA	NA	NA	NA	NA	NA
gene5269	17354214	CHLNCDRAFT_134842	5267.17	1968.58	0.373746	-1.41987	2.29777e-05	0.000348611	DOWN	NA	NA	NA	NA	NA	NA	NA	NA	NA
gene1824	17357618	CHLNCDRAFT_141869	1426.56	626.496	0.439165	-1.18717	2.2752e-05	0.0003465	DOWN	NA	NA	NA	NA	NA	NA	NA	NA	NA
gene4295	17355473	CHLNCDRAFT_17459	36.3032	4.223	0.116326	-3.10376	2.17961e-05	0.000333525	DOWN	NA	NA	NA	NA	NA	NA	NA	NA	NA
gene5913	17353692	CHLNCDRAFT_135683	3073.66	1232.24	0.400904	-1.31867	2.14611e-05	0.000328922	DOWN	NA	NA	NA	NA	NA	NA	NA	NA	NA
gene8245	17351345	CHLNCDRAFT_139563	712.298	320.172	0.449492	-1.15363	1.99302e-05	0.00030791	DOWN	NA	NA	NA	NA	NA	NA	NA	NA	NA
gene3801	17355716	CHLNCDRAFT_144804	1004.12	446.825	0.444992	-1.16815	1.88765e-05	0.000293516	DOWN	NA	NA	NA	NA	NA	NA	NA	NA	NA
gene1844	17357686	CHLNCDRAFT_141895	310.528	120.031	0.38654	-1.37131	1.811e-05	0.000284195	DOWN	NA	NA	NA	NA	NA	NA	NA	NA	NA
gene7740	17351837	CHLNCDRAFT_17618	26.5031	2.08638	0.0787218	-3.66709	1.75227e-05	0.000275582	DOWN	NA	NA	NA	NA	NA	NA	NA	NA	NA
gene2547	17357077	CHLNCDRAFT_14180	176.11	54.4943	0.309434	-1.6923	1.62804e-05	0.000257728	DOWN	NA	NA	NA	NA	NA	NA	NA	NA	NA
gene4698	17354937	CHLNCDRAFT_17642	2330.35	959.928	0.411925	-1.27955	1.61737e-05	0.000256461	DOWN	NA	NA	NA	NA	NA	NA	NA	NA	NA
gene4155	17355482	CHLNCDRAFT_145270	1676.35	714.433	0.426184	-1.23045	1.5808e-05	0.000251076	DOWN	NA	NA	NA	NA	NA	NA	NA	NA	NA
gene8494	17351097	CHLNCDRAFT_139889	2164.76	888.37	0.410378	-1.28498	1.46317e-05	0.000233937	DOWN	NA	NA	NA	NA	NA	NA	NA	NA	NA
gene5914	17353789	CHLNCDRAFT_135684	6384.66	2274.34	0.35622	-1.48916	1.37313e-05	0.000220641	DOWN	NA	NA	NA	NA	NA	NA	NA	NA	NA
gene7112	17352395	CHLNCDRAFT_137328	1334.07	577.698	0.433035	-1.20745	1.34648e-05	0.000217084	DOWN	NA	NA	NA	NA	NA	NA	NA	NA	NA
gene5619	17354108	CHLNCDRAFT_135297	526.513	227.943	0.43293	-1.20779	1.32976e-05	0.000214748	DOWN	NA	NA	NA	NA	NA	NA	NA	NA	NA
gene8157	17351326	CHLNCDRAFT_139451	1146.24	501.394	0.437425	-1.19289	1.31324e-05	0.000212436	DOWN	NA	NA	NA	NA	NA	NA	NA	NA	NA
gene3868	17355581	CHLNCDRAFT_144889	463.355	195.877	0.422737	-1.24217	1.28224e-05	0.000208121	DOWN	NA	NA	NA	NA	NA	NA	NA	NA	NA
gene8973	17350698	CHLNCDRAFT_141274	71.3886	12.6415	0.17708	-2.49752	1.24284e-05	0.000202066	DOWN	NA	NA	NA	NA	NA	NA	NA	NA	NA
gene6122	17353384	CHLNCDRAFT_53340	1423.88	609.596	0.428122	-1.22391	1.20683e-05	0.000196877	DOWN	NA	NA	NA	NA	NA	NA	NA	NA	NA
gene2631	17356828	CHLNCDRAFT_57278	3568.47	1360.97	0.381386	-1.39068	1.15212e-05	0.000188912	DOWN	NA	NA	NA	NA	NA	NA	NA	NA	NA
gene1585	17358089	CHLNCDRAFT_140685	572.444	248.027	0.433278	-1.20664	1.12394e-05	0.000184606	DOWN	NA	NA	NA	NA	NA	NA	NA	NA	NA
gene5394	17354443	CHLNCDRAFT_52864	807.971	352.269	0.435992	-1.19763	1.03453e-05	0.000171384	DOWN	NA	NA	NA	NA	NA	NA	NA	NA	NA
gene3731	17355821	CHLNCDRAFT_57579	225.461	74.5775	0.330777	-1.59607	9.43807e-06	0.000157165	DOWN	NA	NA	NA	NA	NA	NA	NA	NA	NA
gene2366	17357099	CHLNCDRAFT_50866	395.474	161.588	0.408593	-1.29127	8.86688e-06	0.000148138	DOWN	NA	NA	NA	NA	NA	NA	NA	NA	NA
gene7046	17352586	CHLNCDRAFT_58658	752.802	325.37	0.432213	-1.21019	8.35795e-06	0.000140676	DOWN	NA	NA	NA	NA	NA	NA	NA	NA	NA
gene4296	17355470	CHLNCDRAFT_145456	1163.17	496.343	0.426717	-1.22865	8.07858e-06	0.000136789	DOWN	NA	NA	NA	NA	NA	NA	NA	NA	NA
gene5156	17354399	CHLNCDRAFT_134715	557.363	236.115	0.423629	-1.23913	7.44302e-06	0.000126795	DOWN	NA	NA	NA	NA	NA	NA	NA	NA	NA
gene6360	17353086	CHLNCDRAFT_136287	528.854	222.396	0.420524	-1.24974	7.23491e-06	0.000123687	DOWN	NA	NA	NA	NA	NA	NA	NA	NA	NA
gene5373	17354470	CHLNCDRAFT_134959	644.925	274.349	0.425396	-1.23312	6.94275e-06	0.000119542	DOWN	NA	NA	NA	NA	NA	NA	NA	NA	NA
gene696	17358395	CHLNCDRAFT_56654	1555.98	644.25	0.414047	-1.27213	6.80588e-06	0.000117606	DOWN	NA	NA	NA	NA	NA	NA	NA	NA	NA
gene887	17358958	CHLNCDRAFT_137845	579.235	246.994	0.426413	-1.22968	6.76152e-06	0.00011705	DOWN	NA	NA	NA	NA	NA	NA	NA	NA	NA
gene5624	17354101	CHLNCDRAFT_135305	258.146	89.4186	0.346388	-1.52954	6.30487e-06	0.000110135	DOWN	NA	NA	NA	NA	NA	NA	NA	NA	NA
gene8481	17351152	CHLNCDRAFT_54922	829.065	355.371	0.428641	-1.22216	5.94532e-06	0.000104233	DOWN	NA	NA	NA	NA	NA	NA	NA	NA	NA
gene1953	17357485	CHLNCDRAFT_142035	844.458	357.761	0.423658	-1.23903	5.4784e-06	9.68754e-05	DOWN	NA	NA	NA	NA	NA	NA	NA	NA	NA
gene6336	17353460	CHLNCDRAFT_53480	758.014	324.614	0.428243	-1.2235	5.45147e-06	9.66307e-05	DOWN	NA	NA	NA	NA	NA	NA	NA	NA	NA
gene2897	17356552	CHLNCDRAFT_143478	520.118	216.74	0.416714	-1.26287	5.0951e-06	9.08155e-05	DOWN	NA	NA	NA	NA	NA	NA	NA	NA	NA
gene2867	17356443	CHLNCDRAFT_143442	3750.56	1358.52	0.362217	-1.46507	4.94695e-06	8.83383e-05	DOWN	NA	NA	NA	NA	NA	NA	NA	NA	NA
gene5436	17354341	CHLNCDRAFT_135027	1387.62	574.566	0.414065	-1.27207	4.66325e-06	8.3427e-05	DOWN	NA	NA	NA	NA	NA	NA	NA	NA	NA
gene7418	17352226	CHLNCDRAFT_26336	344.221	131.324	0.38151	-1.39021	4.65291e-06	8.33972e-05	DOWN	NA	NA	NA	NA	NA	NA	NA	NA	NA
gene3201	17356458	CHLNCDRAFT_143888	318.752	119.341	0.374403	-1.41734	4.64414e-06	8.33952e-05	DOWN	NA	NA	NA	NA	NA	NA	NA	NA	NA
gene8819	17350760	CHLNCDRAFT_55172	252.441	83.8656	0.332219	-1.58979	4.39404e-06	7.91997e-05	DOWN	NA	NA	NA	NA	NA	NA	NA	NA	NA
gene8244	17351450	CHLNCDRAFT_139561	1299.15	537.922	0.414055	-1.2721	4.2943e-06	7.75472e-05	DOWN	NA	NA	NA	NA	NA	NA	NA	NA	NA
gene7601	17352014	CHLNCDRAFT_58822	3644.78	1315.95	0.36105	-1.46973	4.19252e-06	7.59943e-05	DOWN	NA	NA	NA	NA	NA	NA	NA	NA	NA
gene5324	17354226	CHLNCDRAFT_134905	1743.53	697.384	0.399983	-1.32199	4.09441e-06	7.43559e-05	DOWN	NA	NA	NA	NA	NA	NA	NA	NA	NA
gene3946	17355728	CHLNCDRAFT_144992	539.969	223.125	0.413219	-1.27502	3.99083e-06	7.2612e-05	DOWN	NA	NA	NA	NA	NA	NA	NA	NA	NA
gene8447	17351202	CHLNCDRAFT_139804	158.611	41.4441	0.261294	-1.93625	3.70691e-06	6.80897e-05	DOWN	NA	NA	NA	NA	NA	NA	NA	NA	NA
gene1508	17358216	CHLNCDRAFT_140588	717.092	299.673	0.4179	-1.25877	3.68652e-06	6.79349e-05	DOWN	NA	NA	NA	NA	NA	NA	NA	NA	NA
gene3006	17356650	CHLNCDRAFT_143620	1570.21	628.337	0.40016	-1.32135	3.25871e-06	6.05503e-05	DOWN	NA	NA	NA	NA	NA	NA	NA	NA	NA
gene8616	17351019	CHLNCDRAFT_140051	435.063	171.633	0.394503	-1.34189	3.12101e-06	5.83295e-05	DOWN	NA	NA	NA	NA	NA	NA	NA	NA	NA
gene3528	17356098	CHLNCDRAFT_144372	358.277	134.501	0.375412	-1.41345	2.97519e-06	5.58211e-05	DOWN	NA	NA	NA	NA	NA	NA	NA	NA	NA
gene9448	17350162	CHLNCDRAFT_142548	3240.19	1174.92	0.362609	-1.46351	2.90504e-06	5.46113e-05	DOWN	NA	NA	NA	NA	NA	NA	NA	NA	NA
gene914	17358414	CHLNCDRAFT_137873	11744.7	3683.88	0.313662	-1.67272	2.81018e-06	5.29316e-05	DOWN	NA	NA	NA	NA	NA	NA	NA	NA	NA
gene3343	17356039	CHLNCDRAFT_144139	3215.06	1164.33	0.362149	-1.46535	2.69957e-06	5.11483e-05	DOWN	NA	NA	NA	NA	NA	NA	NA	NA	NA
gene2497	17357202	CHLNCDRAFT_57225	911.875	372.485	0.408482	-1.29166	2.38008e-06	4.5453e-05	DOWN	NA	NA	NA	NA	NA	NA	NA	NA	NA
gene2649	17356795	CHLNCDRAFT_143083	37.8042	3.17178	0.0839002	-3.57518	2.35894e-06	4.51388e-05	DOWN	NA	NA	NA	NA	NA	NA	NA	NA	NA
gene952	17358748	CHLNCDRAFT_137916	1693.73	664.913	0.392574	-1.34896	2.34251e-06	4.49136e-05	DOWN	NA	NA	NA	NA	NA	NA	NA	NA	NA
gene8147	17351588	CHLNCDRAFT_27202	136.012	31.3847	0.23075	-2.1156	2.26566e-06	4.35268e-05	DOWN	NA	NA	NA	NA	NA	NA	NA	NA	NA
gene8215	17351440	CHLNCDRAFT_139527	3590.16	1257	0.350123	-1.51406	2.05188e-06	4.01409e-05	DOWN	NA	NA	NA	NA	NA	NA	NA	NA	NA
gene5120	17354312	CHLNCDRAFT_35720	2436.74	906.286	0.371926	-1.42691	2.01532e-06	3.9506e-05	DOWN	NA	NA	NA	NA	NA	NA	NA	NA	NA
gene3550	17356060	CHLNCDRAFT_144397	1586.43	626.354	0.39482	-1.34073	1.92817e-06	3.81081e-05	DOWN	NA	NA	NA	NA	NA	NA	NA	NA	NA
gene2633	17356829	CHLNCDRAFT_21254	727.992	295.978	0.406568	-1.29843	1.83533e-06	3.64981e-05	DOWN	NA	NA	NA	NA	NA	NA	NA	NA	NA
gene3475	17356127	CHLNCDRAFT_14186	336.227	120.588	0.35865	-1.47935	1.81374e-06	3.62183e-05	DOWN	NA	NA	NA	NA	NA	NA	NA	NA	NA
gene6693	17353000	CHLNCDRAFT_136748	813.525	331.399	0.407362	-1.29562	1.75302e-06	3.51518e-05	DOWN	NA	NA	NA	NA	NA	NA	NA	NA	NA
gene5986	17353717	CHLNCDRAFT_135773	284.009	95.6114	0.336649	-1.57068	1.72715e-06	3.47053e-05	DOWN	NA	NA	NA	NA	NA	NA	NA	NA	NA
gene1137	17358841	CHLNCDRAFT_138137	448.1	172.134	0.384143	-1.38028	1.72009e-06	3.46357e-05	DOWN	NA	NA	NA	NA	NA	NA	NA	NA	NA
gene7224	17352448	CHLNCDRAFT_137467	137.285	30.972	0.225603	-2.14814	1.62599e-06	3.30787e-05	DOWN	NA	NA	NA	NA	NA	NA	NA	NA	NA
gene9042	17350627	CHLNCDRAFT_141353	292.061	98.3658	0.336799	-1.57004	1.6324e-06	3.30787e-05	DOWN	NA	NA	NA	NA	NA	NA	NA	NA	NA
gene9575	17350047	CHLNCDRAFT_145635	70.9094	9.76788	0.137752	-2.85986	1.57221e-06	3.22656e-05	DOWN	NA	NA	NA	NA	NA	NA	NA	NA	NA
gene1109	17358672	CHLNCDRAFT_138104	275.525	90.1167	0.327073	-1.61232	1.54608e-06	3.17971e-05	DOWN	NA	NA	NA	NA	NA	NA	NA	NA	NA
gene4079	17355647	CHLNCDRAFT_145157	19.8837	0.364481	0.0183306	-5.7696	1.41877e-06	2.94304e-05	DOWN	NA	NA	NA	NA	NA	NA	NA	NA	NA
gene7668	17351848	CHLNCDRAFT_58845	351.192	126.366	0.359819	-1.47466	1.37028e-06	2.86094e-05	DOWN	NA	NA	NA	NA	NA	NA	NA	NA	NA
gene4760	17354932	CHLNCDRAFT_52423	43.6106	3.98315	0.0913345	-3.4527	1.14995e-06	2.41666e-05	DOWN	NA	NA	NA	NA	NA	NA	NA	NA	NA
gene5270	17354533	CHLNCDRAFT_134843	501.492	194.437	0.387717	-1.36692	1.07286e-06	2.26453e-05	DOWN	NA	NA	NA	NA	NA	NA	NA	NA	NA
gene1600	17358206	CHLNCDRAFT_34176	706.676	280.148	0.396431	-1.33486	1.03258e-06	2.19881e-05	DOWN	NA	NA	NA	NA	NA	NA	NA	NA	NA
gene1446	17357964	CHLNCDRAFT_140514	1006.17	399.088	0.396641	-1.33409	1.0245e-06	2.18643e-05	DOWN	NA	NA	NA	NA	NA	NA	NA	NA	NA
gene7474	17352089	CHLNCDRAFT_138526	2069.61	763.181	0.368756	-1.43926	9.66254e-07	2.07131e-05	DOWN	NA	NA	NA	NA	NA	NA	NA	NA	NA
gene6962	17352631	CHLNCDRAFT_137119	6034.88	1892.01	0.313513	-1.6734	9.42945e-07	2.03039e-05	DOWN	NA	NA	NA	NA	NA	NA	NA	NA	NA
gene2646	17357178	CHLNCDRAFT_21078	478.672	181.468	0.379107	-1.39932	8.93768e-07	1.93151e-05	DOWN	NA	NA	NA	NA	NA	NA	NA	NA	NA
gene3120	17356682	CHLNCDRAFT_16812	721.042	282.953	0.392423	-1.34952	8.53318e-07	1.84982e-05	DOWN	NA	NA	NA	NA	NA	NA	NA	NA	NA
gene8833	17350774	CHLNCDRAFT_141094	1275.27	495.071	0.388209	-1.36509	8.1879e-07	1.77905e-05	DOWN	NA	NA	NA	NA	NA	NA	NA	NA	NA
gene1913	17357335	CHLNCDRAFT_141990	241.153	71.1578	0.295074	-1.76085	8.02464e-07	1.75141e-05	DOWN	NA	NA	NA	NA	NA	NA	NA	NA	NA
gene5116	17354366	CHLNCDRAFT_134667	5396.87	1703.05	0.315563	-1.664	7.74156e-07	1.69347e-05	DOWN	NA	NA	NA	NA	NA	NA	NA	NA	NA
gene8207	17351337	CHLNCDRAFT_139515	3506.5	1177.22	0.335726	-1.57464	7.2581e-07	1.60228e-05	DOWN	NA	NA	NA	NA	NA	NA	NA	NA	NA
gene8905	17350662	CHLNCDRAFT_141202	5541.7	1731.13	0.312382	-1.67862	7.00894e-07	1.55083e-05	DOWN	NA	NA	NA	NA	NA	NA	NA	NA	NA
gene1938	17357379	CHLNCDRAFT_142018	572.384	224.013	0.391369	-1.3534	6.97818e-07	1.54758e-05	DOWN	NA	NA	NA	NA	NA	NA	NA	NA	NA
gene9386	17350231	CHLNCDRAFT_55557	606.257	235.388	0.388264	-1.36489	6.82214e-07	1.51998e-05	DOWN	NA	NA	NA	NA	NA	NA	NA	NA	NA
gene2976	17356690	CHLNCDRAFT_143581	1985.33	725.002	0.365179	-1.45332	6.3318e-07	1.41729e-05	DOWN	NA	NA	NA	NA	NA	NA	NA	NA	NA
gene2693	17356867	CHLNCDRAFT_143134	598.934	229.313	0.382868	-1.38508	5.72427e-07	1.29334e-05	DOWN	NA	NA	NA	NA	NA	NA	NA	NA	NA
gene8296	17351398	CHLNCDRAFT_139626	982.356	379.744	0.386564	-1.37122	5.35426e-07	1.21258e-05	DOWN	NA	NA	NA	NA	NA	NA	NA	NA	NA
gene3804	17355717	CHLNCDRAFT_144808	90.4374	13.3691	0.147827	-2.75802	5.17527e-07	1.1751e-05	DOWN	NA	NA	NA	NA	NA	NA	NA	NA	NA
gene4124	17355477	CHLNCDRAFT_145232	96.7969	15.881	0.164065	-2.60766	5.09258e-07	1.16152e-05	DOWN	NA	NA	NA	NA	NA	NA	NA	NA	NA
gene5569	17353982	CHLNCDRAFT_135232	883.095	342.176	0.387474	-1.36783	4.53299e-07	1.04129e-05	DOWN	NA	NA	NA	NA	NA	NA	NA	NA	NA
gene8523	17351122	CHLNCDRAFT_139923	1404.67	528.431	0.376196	-1.41044	4.22462e-07	9.75108e-06	DOWN	NA	NA	NA	NA	NA	NA	NA	NA	NA
gene3697	17356034	CHLNCDRAFT_144598	368.076	128.214	0.348334	-1.52146	4.19307e-07	9.70151e-06	DOWN	NA	NA	NA	NA	NA	NA	NA	NA	NA
gene2221	17357765	CHLNCDRAFT_142357	175.209	42.0076	0.239757	-2.06036	4.13352e-07	9.58679e-06	DOWN	NA	NA	NA	NA	NA	NA	NA	NA	NA
gene2134	17357715	CHLNCDRAFT_142248	1253.73	470.529	0.375302	-1.41388	2.98047e-07	7.03113e-06	DOWN	NA	NA	NA	NA	NA	NA	NA	NA	NA
gene2894	17356366	CHLNCDRAFT_143475	654.872	247.239	0.377538	-1.40531	2.92196e-07	6.91004e-06	DOWN	NA	NA	NA	NA	NA	NA	NA	NA	NA
gene6056	17353746	CHLNCDRAFT_36181	2736.08	921.222	0.336694	-1.57049	2.87315e-07	6.81134e-06	DOWN	NA	NA	NA	NA	NA	NA	NA	NA	NA
gene3771	17355607	CHLNCDRAFT_22261	851.325	323.853	0.380411	-1.39437	2.79751e-07	6.6484e-06	DOWN	NA	NA	NA	NA	NA	NA	NA	NA	NA
gene9449	17350165	CHLNCDRAFT_59444	2823.08	940.858	0.333274	-1.58522	2.55952e-07	6.12821e-06	DOWN	NA	NA	NA	NA	NA	NA	NA	NA	NA
gene1647	17358194	CHLNCDRAFT_140758	413.671	144.208	0.348606	-1.52033	2.35754e-07	5.7157e-06	DOWN	NA	NA	NA	NA	NA	NA	NA	NA	NA
gene4277	17355527	CHLNCDRAFT_145428	2124.06	738.333	0.347604	-1.52449	2.17905e-07	5.30972e-06	DOWN	NA	NA	NA	NA	NA	NA	NA	NA	NA
gene4980	17354820	CHLNCDRAFT_134456	371.67	125.007	0.336338	-1.57202	2.10787e-07	5.16241e-06	DOWN	NA	NA	NA	NA	NA	NA	NA	NA	NA
gene7689	17351814	CHLNCDRAFT_58851	2318.1	793.155	0.342158	-1.54727	1.94374e-07	4.79705e-06	DOWN	NA	NA	NA	NA	NA	NA	NA	NA	NA
gene5602	17354068	CHLNCDRAFT_58168	1934.52	676.279	0.349586	-1.51628	1.76564e-07	4.41461e-06	DOWN	NA	NA	NA	NA	NA	NA	NA	NA	NA
gene2786	17357207	CHLNCDRAFT_143250	1273.49	468.815	0.368134	-1.4417	1.74619e-07	4.38826e-06	DOWN	NA	NA	NA	NA	NA	NA	NA	NA	NA
gene2884	17356542	CHLNCDRAFT_34835	438.306	151.529	0.345716	-1.53234	1.54099e-07	3.89292e-06	DOWN	NA	NA	NA	NA	NA	NA	NA	NA	NA
gene98	17359043	CHLNCDRAFT_56456	5183.99	1523.07	0.293802	-1.76708	1.51072e-07	3.83659e-06	DOWN	NA	NA	NA	NA	NA	NA	NA	NA	NA
gene1381	17357973	CHLNCDRAFT_140437	1245.52	456.693	0.366668	-1.44745	1.48588e-07	3.78348e-06	DOWN	NA	NA	NA	NA	NA	NA	NA	NA	NA
gene2590	17357298	CHLNCDRAFT_142995	369.124	121.202	0.32835	-1.60669	1.32021e-07	3.40672e-06	DOWN	NA	NA	NA	NA	NA	NA	NA	NA	NA
gene598	17359231	CHLNCDRAFT_133659	652.002	236.779	0.363157	-1.46133	1.22562e-07	3.17113e-06	DOWN	NA	NA	NA	NA	NA	NA	NA	NA	NA
gene3386	17356022	CHLNCDRAFT_144191	1384.01	496.748	0.358919	-1.47827	1.1973e-07	3.11459e-06	DOWN	NA	NA	NA	NA	NA	NA	NA	NA	NA
gene7109	17352538	CHLNCDRAFT_137325	2421.3	803.992	0.332049	-1.59053	1.1555e-07	3.0222e-06	DOWN	NA	NA	NA	NA	NA	NA	NA	NA	NA
gene5863	17353663	CHLNCDRAFT_135626	1181.7	425.187	0.359809	-1.4747	1.06474e-07	2.80771e-06	DOWN	NA	NA	NA	NA	NA	NA	NA	NA	NA
gene6921	17352726	CHLNCDRAFT_137072	358.2	114.497	0.319646	-1.64545	1.0536e-07	2.78597e-06	DOWN	NA	NA	NA	NA	NA	NA	NA	NA	NA
gene7074	17352387	CHLNCDRAFT_137272	3559.13	1099.23	0.308848	-1.69503	9.73723e-08	2.61061e-06	DOWN	NA	NA	NA	NA	NA	NA	NA	NA	NA
gene9569	17350054	CHLNCDRAFT_145185	122.357	19.6202	0.160352	-2.64069	9.55041e-08	2.56767e-06	DOWN	NA	NA	NA	NA	NA	NA	NA	NA	NA
gene3552	17356152	CHLNCDRAFT_144401	2066.18	692.618	0.335217	-1.57683	8.84049e-08	2.39016e-06	DOWN	NA	NA	NA	NA	NA	NA	NA	NA	NA
gene8434	17351212	CHLNCDRAFT_27628	1124.85	401.944	0.357331	-1.48467	8.07049e-08	2.18813e-06	DOWN	NA	NA	NA	NA	NA	NA	NA	NA	NA
gene6858	17352689	CHLNCDRAFT_53866	431.84	145.954	0.337983	-1.56498	7.89347e-08	2.14618e-06	DOWN	NA	NA	NA	NA	NA	NA	NA	NA	NA
gene1235	17358132	CHLNCDRAFT_140263	3596.03	1090.12	0.303145	-1.72192	6.67908e-08	1.82631e-06	DOWN	NA	NA	NA	NA	NA	NA	NA	NA	NA
gene9350	17350248	CHLNCDRAFT_141776	1003.67	360.84	0.359519	-1.47586	6.59575e-08	1.81294e-06	DOWN	Free_methionine-(R)-sulfoxide_reductase	BFS86_13315	Shewanella_algae	NA	NA	NA	NA	NA	NA
gene7681	17351934	CHLNCDRAFT_138815	1092.3	392.985	0.359777	-1.47483	6.50015e-08	1.8018e-06	DOWN	NA	NA	NA	NA	NA	NA	NA	NA	NA
gene345	17359611	CHLNCDRAFT_133294	23719.1	6088.35	0.256685	-1.96193	5.94591e-08	1.65403e-06	DOWN	NA	NA	NA	NA	NA	NA	NA	NA	NA
gene1928	17357612	CHLNCDRAFT_142006	1503.14	521.246	0.346771	-1.52795	5.29066e-08	1.48896e-06	DOWN	NA	NA	NA	NA	NA	NA	NA	NA	NA
gene4893	17354804	CHLNCDRAFT_134325	346.457	106.13	0.306331	-1.70684	4.95254e-08	1.402e-06	DOWN	NA	NA	NA	NA	NA	NA	NA	NA	NA
gene6217	17353531	CHLNCDRAFT_136094	910.9	324.441	0.356177	-1.48933	4.74046e-08	1.34991e-06	DOWN	NA	NA	NA	NA	NA	NA	NA	NA	NA
gene5189	17354209	CHLNCDRAFT_52747	919.342	326.834	0.355509	-1.49204	4.68223e-08	1.33728e-06	DOWN	NA	NA	NA	NA	NA	NA	NA	NA	NA
gene6761	17352965	CHLNCDRAFT_58559	2606.93	825.507	0.316658	-1.659	4.60699e-08	1.32365e-06	DOWN	NA	NA	NA	NA	NA	NA	NA	NA	NA
gene2622	17357065	CHLNCDRAFT_143035	2770.08	860.848	0.310767	-1.6861	3.90158e-08	1.13796e-06	DOWN	NA	NA	NA	NA	NA	NA	NA	NA	NA
gene7687	17351940	CHLNCDRAFT_138820	164.286	31.0698	0.18912	-2.40262	3.88742e-08	1.13728e-06	DOWN	NA	NA	NA	NA	NA	NA	NA	NA	NA
gene9183	17350460	CHLNCDRAFT_13992	313.624	92.6327	0.295362	-1.75944	3.74186e-08	1.10139e-06	DOWN	NA	NA	NA	NA	NA	NA	NA	NA	NA
gene6458	17353054	CHLNCDRAFT_25497	1107.04	389.432	0.351776	-1.50727	3.71509e-08	1.09686e-06	DOWN	NA	NA	NA	NA	NA	NA	NA	NA	NA
gene7044	17352782	CHLNCDRAFT_137216	1235.25	422.791	0.342272	-1.54679	2.4831e-08	7.44543e-07	DOWN	NA	NA	NA	NA	NA	NA	NA	NA	NA
gene1133	17358830	CHLNCDRAFT_138133	597.84	203.585	0.340534	-1.55413	2.1994e-08	6.67799e-07	DOWN	NA	NA	NA	NA	NA	NA	NA	NA	NA
gene7043	17352778	CHLNCDRAFT_25920	124.907	18.3874	0.147209	-2.76406	2.0421e-08	6.23976e-07	DOWN	NA	NA	NA	NA	NA	NA	NA	NA	NA
gene1174	17358934	CHLNCDRAFT_138178	159.689	28.4374	0.17808	-2.48941	1.87402e-08	5.74439e-07	DOWN	NA	NA	NA	NA	NA	NA	NA	NA	NA
gene3906	17355860	CHLNCDRAFT_144937	3792.43	1081.05	0.285056	-1.81068	1.81402e-08	5.59612e-07	DOWN	NA	NA	NA	NA	NA	NA	NA	NA	NA
gene3787	17355531	CHLNCDRAFT_35065	1131.42	380.809	0.336576	-1.571	1.80507e-08	5.58644e-07	DOWN	NA	NA	NA	NA	NA	NA	NA	NA	NA
gene5472	17354005	CHLNCDRAFT_135094	5447.42	1451.57	0.26647	-1.90796	1.6484e-08	5.16802e-07	DOWN	NA	NA	NA	NA	NA	NA	NA	NA	NA
gene253	17359376	CHLNCDRAFT_33527	744.583	250.621	0.336593	-1.57092	1.09678e-08	3.51884e-07	DOWN	NA	NA	NA	NA	NA	NA	NA	NA	NA
gene257	17359506	CHLNCDRAFT_133184	3489.39	987.654	0.283045	-1.8209	1.02928e-08	3.32444e-07	DOWN	NA	NA	NA	NA	NA	NA	NA	NA	NA
gene2029	17357660	CHLNCDRAFT_142121	620.218	215.336	0.347194	-1.52619	8.98139e-09	2.92047e-07	DOWN	NA	NA	NA	NA	NA	NA	NA	NA	NA
gene1555	17358046	CHLNCDRAFT_140648	7282.6	1799.88	0.247148	-2.01655	8.64273e-09	2.82946e-07	DOWN	Uncharacterized_protein	Esi_0146_0023	Ectocarpus_siliculosus (Brown_alga) (Conferva_siliculosa)	NA	NA	NA	NA	NA	NA
gene6549	17353255	CHLNCDRAFT_58489	7972.78	1945.97	0.244076	-2.0346	8.31603e-09	2.75058e-07	DOWN	NA	NA	NA	NA	NA	NA	NA	NA	NA
gene5023	17354644	CHLNCDRAFT_134520	182.717	33.6044	0.183915	-2.44289	5.73518e-09	1.95057e-07	DOWN	NA	NA	NA	NA	NA	NA	NA	NA	NA
gene4303	17355384	CHLNCDRAFT_145466	729.285	239.551	0.328474	-1.60615	5.3217e-09	1.82933e-07	DOWN	NA	NA	NA	NA	NA	NA	NA	NA	NA
gene6213	17353446	CHLNCDRAFT_25299	391.74	113.563	0.289893	-1.78641	5.13623e-09	1.77191e-07	DOWN	LRR-GTPase_of_the_ROCO_family	Esi_0164_0034	Ectocarpus_siliculosus (Brown_alga) (Conferva_siliculosa)	NA	NA	NA	NA	NA	NA
gene6079	17353318	CHLNCDRAFT_135909	4901.36	1256.34	0.256325	-1.96396	4.31851e-09	1.50057e-07	DOWN	NA	NA	NA	NA	NA	NA	NA	NA	NA
gene6924	17352759	CHLNCDRAFT_137075	5940.03	1473.11	0.247998	-2.0116	4.12931e-09	1.45053e-07	DOWN	NA	NA	NA	NA	NA	NA	NA	NA	NA
gene1595	17358065	CHLNCDRAFT_140696	1653.09	513.407	0.310574	-1.68699	4.06895e-09	1.43984e-07	DOWN	NA	NA	NA	NA	NA	NA	NA	NA	NA
gene7233	17352462	CHLNCDRAFT_137480	1421.63	448.174	0.315253	-1.66542	3.24005e-09	1.15931e-07	DOWN	NA	NA	NA	NA	NA	NA	NA	NA	NA
gene4446	17355184	CHLNCDRAFT_133736	679.393	218.163	0.321115	-1.63884	2.87709e-09	1.04498e-07	DOWN	NA	NA	NA	NA	NA	NA	NA	NA	NA
gene9231	17350390	CHLNCDRAFT_141619	3659.8	974.764	0.266344	-1.90864	2.71799e-09	9.90933e-08	DOWN	NA	NA	NA	NA	NA	NA	NA	NA	NA
gene6644	17352929	CHLNCDRAFT_136693	77.2128	5.71172	0.0739738	-3.75684	2.36525e-09	8.68913e-08	DOWN	NA	NA	NA	NA	NA	NA	NA	NA	NA
gene2248	17357501	CHLNCDRAFT_142389	1941.48	581.174	0.299346	-1.74011	2.29486e-09	8.55623e-08	DOWN	NA	NA	NA	NA	NA	NA	NA	NA	NA
gene3565	17356171	CHLNCDRAFT_57528	501.757	151.99	0.302915	-1.72301	1.6953e-09	6.50091e-08	DOWN	NA	NA	NA	NA	NA	NA	NA	NA	NA
gene1383	17357834	CHLNCDRAFT_11032	771.469	247.132	0.320339	-1.64233	1.62853e-09	6.26984e-08	DOWN	NA	NA	NA	NA	NA	NA	NA	NA	NA
gene3886	17355658	CHLNCDRAFT_144914	1602.96	490.534	0.306018	-1.70831	1.55576e-09	6.01373e-08	DOWN	NA	NA	NA	NA	NA	NA	NA	NA	NA
gene3800	17355707	CHLNCDRAFT_51779	1765.24	531.661	0.301184	-1.73128	1.53649e-09	5.96317e-08	DOWN	NA	NA	NA	NA	NA	NA	NA	NA	NA
gene8613	17351017	CHLNCDRAFT_140047	6960.53	1609.5	0.231232	-2.11259	1.43288e-09	5.60628e-08	DOWN	NA	NA	NA	NA	NA	NA	NA	NA	NA
gene1783	17358169	CHLNCDRAFT_140922	551.762	166.271	0.301345	-1.73051	1.33343e-09	5.25993e-08	DOWN	NA	NA	NA	NA	NA	NA	NA	NA	NA
gene2019	17357648	CHLNCDRAFT_142109	5907.96	1394.11	0.235971	-2.08332	1.23971e-09	4.93067e-08	DOWN	NA	NA	NA	NA	NA	NA	NA	NA	NA
gene569	17359023	CHLNCDRAFT_133608	1854.32	544.709	0.293752	-1.76733	8.76474e-10	3.55952e-08	DOWN	NA	NA	NA	NA	NA	NA	NA	NA	NA
gene3518	17356162	CHLNCDRAFT_21975	3023.64	800.471	0.264738	-1.91737	7.2932e-10	2.98711e-08	DOWN	NA	NA	NA	NA	NA	NA	NA	NA	NA
gene3579	17355975	CHLNCDRAFT_51632	3521.24	897.75	0.254953	-1.9717	6.46999e-10	2.66127e-08	DOWN	NA	NA	NA	NA	NA	NA	NA	NA	NA
gene466	17359307	CHLNCDRAFT_33614	2342.7	641.407	0.27379	-1.86886	4.70901e-10	1.96209e-08	DOWN	NA	NA	NA	NA	NA	NA	NA	NA	NA
gene2584	17357216	CHLNCDRAFT_142989	428.884	116.834	0.272413	-1.87613	4.21626e-10	1.76441e-08	DOWN	NA	NA	NA	NA	NA	NA	NA	NA	NA
gene1899	17357589	CHLNCDRAFT_141974	1116.68	334.209	0.299287	-1.7404	4.13207e-10	1.73946e-08	DOWN	NA	NA	NA	NA	NA	NA	NA	NA	NA
gene6792	17352736	CHLNCDRAFT_136910	6687.18	1477.03	0.220875	-2.1787	4.13856e-10	1.73946e-08	DOWN	NA	NA	NA	NA	NA	NA	NA	NA	NA
gene5059	17354818	CHLNCDRAFT_58012	3179.53	810.494	0.25491	-1.97194	3.42721e-10	1.47923e-08	DOWN	NA	NA	NA	NA	NA	NA	NA	NA	NA
gene6874	17352738	CHLNCDRAFT_137009	2770.12	728.07	0.26283	-1.9278	3.20718e-10	1.40314e-08	DOWN	NA	NA	NA	NA	NA	NA	NA	NA	NA
gene7618	17352015	CHLNCDRAFT_58829	1192.2	357.112	0.29954	-1.73918	3.19855e-10	1.40314e-08	DOWN	NA	NA	NA	NA	NA	NA	NA	NA	NA
gene6284	17353322	CHLNCDRAFT_136176	714.03	214.829	0.300868	-1.7328	3.17709e-10	1.40273e-08	DOWN	NA	NA	NA	NA	NA	NA	NA	NA	NA
gene3021	17356679	CHLNCDRAFT_57392	469.332	130.381	0.277801	-1.84787	2.72142e-10	1.20708e-08	DOWN	NA	NA	NA	NA	NA	NA	NA	NA	NA
gene4128	17355498	CHLNCDRAFT_145238	669.537	198.129	0.295919	-1.75672	2.70257e-10	1.20427e-08	DOWN	NA	NA	NA	NA	NA	NA	NA	NA	NA
gene5811	17353856	CHLNCDRAFT_135564	1793.99	504.474	0.281202	-1.83032	2.07567e-10	9.37947e-09	DOWN	NA	NA	NA	NA	NA	NA	NA	NA	NA
gene976	17358512	CHLNCDRAFT_13222	123.813	12.8908	0.104115	-3.26375	2.05115e-10	9.31241e-09	DOWN	NA	NA	NA	NA	NA	NA	NA	NA	NA
gene5031	17354718	CHLNCDRAFT_52636	829.238	246.202	0.296902	-1.75194	1.62367e-10	7.51339e-09	DOWN	NA	NA	NA	NA	NA	NA	NA	NA	NA
gene2713	17356836	CHLNCDRAFT_143159	1160.13	338.644	0.291901	-1.77645	1.60069e-10	7.44282e-09	DOWN	NA	NA	NA	NA	NA	NA	NA	NA	NA
gene3854	17355844	CHLNCDRAFT_144869	802.241	233.605	0.29119	-1.77996	1.31253e-10	6.13257e-09	DOWN	NA	NA	NA	NA	NA	NA	NA	NA	NA
gene8602	17350997	CHLNCDRAFT_140034	764.456	221.318	0.28951	-1.78831	1.16354e-10	5.5168e-09	DOWN	NA	NA	NA	NA	NA	NA	NA	NA	NA
gene3607	17356276	CHLNCDRAFT_144480	1757.46	478.532	0.272286	-1.8768	6.43837e-11	3.1617e-09	DOWN	NA	NA	NA	NA	NA	NA	NA	NA	NA
gene5622	17354118	CHLNCDRAFT_135303	1538.08	423.095	0.275079	-1.86208	6.42783e-11	3.1617e-09	DOWN	NA	NA	NA	NA	NA	NA	NA	NA	NA
gene2768	17356947	CHLNCDRAFT_143229	13452.6	2509.92	0.186575	-2.42218	4.10381e-11	2.05725e-09	DOWN	NA	NA	NA	NA	NA	NA	NA	NA	NA
gene3581	17355976	CHLNCDRAFT_144438	3272.34	766.074	0.234106	-2.09477	3.54045e-11	1.80301e-09	DOWN	NA	NA	NA	NA	NA	NA	NA	NA	NA
gene2018	17357304	CHLNCDRAFT_142108	667.792	184.809	0.276746	-1.85336	2.85098e-11	1.45961e-09	DOWN	NA	NA	NA	NA	NA	NA	NA	NA	NA
gene4375	17355336	CHLNCDRAFT_145559	1366.13	369.7	0.270617	-1.88567	1.93422e-11	1.01179e-09	DOWN	NA	NA	NA	NA	NA	NA	NA	NA	NA
gene2060	17357375	CHLNCDRAFT_142158	972.98	265.503	0.272877	-1.87368	1.56582e-11	8.28078e-10	DOWN	NA	NA	NA	NA	NA	NA	NA	NA	NA
gene1843	17357556	CHLNCDRAFT_57009	1052.85	286.692	0.272301	-1.87672	1.46376e-11	7.78381e-10	DOWN	NA	NA	NA	NA	NA	NA	NA	NA	NA
gene7253	17352511	CHLNCDRAFT_137506	292.463	55.4705	0.189666	-2.39846	7.99823e-12	4.42431e-10	DOWN	NA	NA	NA	NA	NA	NA	NA	NA	NA
gene7039	17352794	CHLNCDRAFT_58654	6749.06	1274.2	0.188797	-2.40509	7.16636e-12	3.98706e-10	DOWN	NA	NA	NA	NA	NA	NA	NA	NA	NA
gene3505	17355969	CHLNCDRAFT_144345	177.737	21.2524	0.119572	-3.06405	5.20021e-12	2.94424e-10	DOWN	NA	NA	NA	NA	NA	NA	NA	NA	NA
gene9167	17350466	CHLNCDRAFT_141534	121.444	8.71666	0.0717752	-3.80037	3.99578e-12	2.33087e-10	DOWN	NA	NA	NA	NA	NA	NA	NA	NA	NA
gene2191	17357456	CHLNCDRAFT_142314	1691.05	422.552	0.249875	-2.00072	3.40441e-12	2.01027e-10	DOWN	NA	NA	NA	NA	NA	NA	NA	NA	NA
gene4575	17355148	CHLNCDRAFT_133905	4144.43	847.895	0.204586	-2.28922	2.78668e-12	1.67637e-10	DOWN	NA	NA	NA	NA	NA	NA	NA	NA	NA
gene4212	17355402	CHLNCDRAFT_145348	1791.9	438.597	0.244767	-2.03052	2.59493e-12	1.57083e-10	DOWN	NA	NA	NA	NA	NA	NA	NA	NA	NA
gene3171	17356380	CHLNCDRAFT_143849	153.15	14.273	0.0931958	-3.42359	2.3607e-12	1.45652e-10	DOWN	NA	NA	NA	NA	NA	NA	NA	NA	NA
gene2580	17357220	CHLNCDRAFT_142985	799.29	205.955	0.257672	-1.95639	2.23353e-12	1.39595e-10	DOWN	NA	NA	NA	NA	NA	NA	NA	NA	NA
gene2865	17356512	CHLNCDRAFT_143440	10864.7	1808.36	0.166443	-2.5869	1.46384e-12	9.26939e-11	DOWN	NA	NA	NA	NA	NA	NA	NA	NA	NA
gene6552	17353183	CHLNCDRAFT_32075	1919.86	459.166	0.239166	-2.06391	1.45891e-12	9.26939e-11	DOWN	NA	NA	NA	NA	NA	NA	NA	NA	NA
gene3580	17356234	CHLNCDRAFT_57532	1953.71	461.431	0.236182	-2.08203	1.04775e-12	6.86029e-11	DOWN	NA	NA	NA	NA	NA	NA	NA	NA	NA
gene3898	17355868	CHLNCDRAFT_14865	590.239	144.426	0.24469	-2.03097	9.31992e-13	6.14412e-11	DOWN	NA	NA	NA	NA	NA	NA	NA	NA	NA
gene5545	17353954	CHLNCDRAFT_135201	535.466	127.005	0.237186	-2.07591	9.27219e-13	6.14412e-11	DOWN	NA	NA	NA	NA	NA	NA	NA	NA	NA
gene6683	17353027	CHLNCDRAFT_136736	2609.8	570.953	0.218773	-2.1925	6.77957e-13	4.6279e-11	DOWN	NA	NA	NA	NA	NA	NA	NA	NA	NA
gene9190	17350431	CHLNCDRAFT_141561	2116.24	477.851	0.225801	-2.14687	4.27521e-13	2.93921e-11	DOWN	NA	NA	NA	NA	NA	NA	NA	NA	NA
gene8539	17351119	CHLNCDRAFT_139946	647.446	151.365	0.233788	-2.09673	1.69164e-13	1.21508e-11	DOWN	NA	NA	NA	NA	NA	NA	NA	NA	NA
gene7818	17351882	CHLNCDRAFT_138974	1668.11	382.33	0.229199	-2.12533	1.56255e-13	1.13936e-11	DOWN	NA	NA	NA	NA	NA	NA	NA	NA	NA
gene9062	17350620	CHLNCDRAFT_141380	1401.1	323.78	0.23109	-2.11347	7.60175e-14	5.76117e-12	DOWN	NA	NA	NA	NA	NA	NA	NA	NA	NA
gene2882	17356420	CHLNCDRAFT_21466	106.611	4.4126	0.0413898	-4.59458	7.21177e-14	5.50899e-12	DOWN	Uncharacterized_protein	Esi_0015_0065	Ectocarpus_siliculosus (Brown_alga) (Conferva_siliculosa)	NA	NA	NA	NA	NA	NA
gene1171	17358518	CHLNCDRAFT_56797	6963.11	1086.75	0.156072	-2.67971	3.90165e-14	3.07815e-12	DOWN	NA	NA	NA	NA	NA	NA	NA	NA	NA
gene6613	17352844	CHLNCDRAFT_136650	238.809	29.1409	0.122026	-3.03474	2.9423e-14	2.3798e-12	DOWN	NA	NA	NA	NA	NA	NA	NA	NA	NA
gene7963	17351707	CHLNCDRAFT_139173	3038.24	578.495	0.190405	-2.39286	2.83912e-14	2.3158e-12	DOWN	NA	NA	NA	NA	NA	NA	NA	NA	NA
gene3516	17356070	CHLNCDRAFT_144359	6038.43	959.703	0.158933	-2.65351	2.56587e-14	2.11081e-12	DOWN	NA	NA	NA	NA	NA	NA	NA	NA	NA
gene7054	17352559	CHLNCDRAFT_137245	1229.54	276	0.224474	-2.15538	2.02733e-14	1.68216e-12	DOWN	NA	NA	NA	NA	NA	NA	NA	NA	NA
gene2186	17357435	CHLNCDRAFT_142309	1714.44	367.672	0.214456	-2.22125	1.4152e-14	1.19485e-12	DOWN	NA	NA	NA	NA	NA	NA	NA	NA	NA
gene4328	17355262	CHLNCDRAFT_145493	915.592	205.913	0.224896	-2.15267	1.09405e-14	9.31878e-13	DOWN	NA	NA	NA	NA	NA	NA	NA	NA	NA
gene3108	17356734	CHLNCDRAFT_143768	626.008	134.518	0.214883	-2.21838	9.90129e-15	8.50892e-13	DOWN	NA	NA	NA	NA	NA	NA	NA	NA	NA
gene2681	17356880	CHLNCDRAFT_143123	5145.42	820.86	0.159532	-2.64808	7.93254e-15	6.87844e-13	DOWN	NA	NA	NA	NA	NA	NA	NA	NA	NA
gene8627	17351027	CHLNCDRAFT_140067	92.7458	1.95371	0.0210652	-5.569	4.7712e-15	4.25211e-13	DOWN	NA	NA	NA	NA	NA	NA	NA	NA	NA
gene6945	17352827	CHLNCDRAFT_137100	799.702	172.422	0.215608	-2.21352	4.63951e-15	4.17339e-13	DOWN	NA	NA	NA	NA	NA	NA	NA	NA	NA
gene218	17359168	CHLNCDRAFT_133137	513.257	102.092	0.19891	-2.32982	4.41173e-15	4.00594e-13	DOWN	NA	NA	NA	NA	NA	NA	NA	NA	NA
gene953	17358753	CHLNCDRAFT_49957	7194.92	1031.42	0.143354	-2.80235	4.18027e-15	3.83192e-13	DOWN	NA	NA	NA	NA	NA	NA	NA	NA	NA
gene955	17358755	CHLNCDRAFT_49959	4872.05	766.223	0.157269	-2.66869	3.66411e-15	3.42398e-13	DOWN	NA	NA	NA	NA	NA	NA	NA	NA	NA
gene4634	17355102	CHLNCDRAFT_133981	4510.51	709.93	0.157395	-2.66754	1.90418e-15	1.81463e-13	DOWN	NA	NA	NA	NA	NA	NA	NA	NA	NA
gene103	17359298	CHLNCDRAFT_18155	1685.4	337.883	0.200476	-2.3185	1.20669e-15	1.17317e-13	DOWN	NA	NA	NA	NA	NA	NA	NA	NA	NA
gene7316	17352265	CHLNCDRAFT_138315	8344.39	1086.58	0.130217	-2.94101	6.7961e-16	6.67474e-14	DOWN	NA	NA	NA	NA	NA	NA	NA	NA	NA
gene4731	17355058	CHLNCDRAFT_134099	2251.36	414.684	0.184193	-2.44071	4.30729e-16	4.27398e-14	DOWN	NA	NA	NA	NA	NA	NA	NA	NA	NA
gene4424	17355328	CHLNCDRAFT_145631	7594.98	977.779	0.12874	-2.95747	2.86913e-16	2.8766e-14	DOWN	NA	NA	NA	NA	NA	NA	NA	NA	NA
gene7688	17351939	CHLNCDRAFT_26777	641.965	121.825	0.189769	-2.39768	1.08739e-16	1.11342e-14	DOWN	NA	NA	NA	NA	NA	NA	NA	NA	NA
gene2095	17357407	CHLNCDRAFT_142202	1649.58	310.652	0.188322	-2.40873	8.95238e-17	9.26523e-15	DOWN	NA	NA	NA	NA	NA	NA	NA	NA	NA
gene8624	17351074	CHLNCDRAFT_9818	2652.79	444.935	0.167723	-2.57584	7.96699e-17	8.33503e-15	DOWN	NA	NA	NA	NA	NA	NA	NA	NA	NA
gene5069	17354729	CHLNCDRAFT_134593	141.611	5.60454	0.0395771	-4.65919	6.77985e-17	7.17099e-15	DOWN	NA	NA	NA	NA	NA	NA	NA	NA	NA
gene3996	17355909	CHLNCDRAFT_145058	978.14	190.212	0.194463	-2.36243	5.86407e-17	6.27129e-15	DOWN	NA	NA	NA	NA	NA	NA	NA	NA	NA
gene3143	17356527	CHLNCDRAFT_143818	1516.89	276.795	0.182475	-2.45423	1.40178e-17	1.58731e-15	DOWN	NA	NA	NA	NA	NA	NA	NA	NA	NA
gene3430	17356023	CHLNCDRAFT_144241	1648.73	293.944	0.178285	-2.48774	1.05376e-17	1.22198e-15	DOWN	NA	NA	NA	NA	NA	NA	NA	NA	NA
gene8612	17351003	CHLNCDRAFT_55018	1814.29	312.872	0.172449	-2.53576	4.97819e-18	5.98939e-16	DOWN	NA	NA	NA	NA	NA	NA	NA	NA	NA
gene2244	17357721	CHLNCDRAFT_142385	8192.83	887.869	0.108371	-3.20594	2.46354e-18	3.03994e-16	DOWN	NA	NA	NA	NA	NA	NA	NA	NA	NA
gene4740	17354957	CHLNCDRAFT_134110	2201.17	353.541	0.160615	-2.63833	1.82932e-18	2.31674e-16	DOWN	NA	NA	NA	NA	NA	NA	NA	NA	NA
gene954	17358754	CHLNCDRAFT_137918	933.402	163.061	0.174695	-2.51709	1.25277e-18	1.60773e-16	DOWN	NA	NA	NA	NA	NA	NA	NA	NA	NA
gene204	17359188	CHLNCDRAFT_49444	689.581	118.848	0.172348	-2.53661	1.10506e-18	1.43733e-16	DOWN	NA	NA	NA	NA	NA	NA	NA	NA	NA
gene8305	17351408	CHLNCDRAFT_59081	1759.12	289.87	0.164781	-2.60137	8.15969e-19	1.07585e-16	DOWN	NA	NA	NA	NA	NA	NA	NA	NA	NA
gene2820	17356818	CHLNCDRAFT_143301	3595.64	469.632	0.130611	-2.93665	2.38967e-19	3.33341e-17	DOWN	NA	NA	NA	NA	NA	NA	NA	NA	NA
gene8174	17351320	CHLNCDRAFT_139471	1852.88	292.874	0.158064	-2.66142	2.13321e-19	3.01943e-17	DOWN	NA	NA	NA	NA	NA	NA	NA	NA	NA
gene7225	17352452	CHLNCDRAFT_137468	3522.49	458.332	0.130116	-2.94213	1.92134e-19	2.76014e-17	DOWN	NA	NA	NA	NA	NA	NA	NA	NA	NA
gene4313	17355410	CHLNCDRAFT_22903	216.707	12.2201	0.05639	-4.14842	1.0661e-19	1.55473e-17	DOWN	NA	NA	NA	NA	NA	NA	NA	NA	NA
gene8013	17351592	CHLNCDRAFT_54633	101.41	0.372521	0.00367342	-8.08866	8.40948e-20	1.24525e-17	DOWN	NA	NA	NA	NA	NA	NA	NA	NA	NA
gene6817	17352776	CHLNCDRAFT_136939	3744.31	463.163	0.123698	-3.01511	7.77397e-20	1.16913e-17	DOWN	NA	NA	NA	NA	NA	NA	NA	NA	NA
gene6474	17353099	CHLNCDRAFT_58452	2403	345.935	0.14396	-2.79626	7.42972e-20	1.1351e-17	DOWN	NA	NA	NA	NA	NA	NA	NA	NA	NA
gene641	17358408	CHLNCDRAFT_137544	858.025	137.226	0.159932	-2.64447	2.91063e-20	4.59259e-18	DOWN	NA	NA	NA	NA	NA	NA	NA	NA	NA
gene4734	17355059	CHLNCDRAFT_134104	503.852	69.6356	0.138206	-2.8551	2.77105e-20	4.44523e-18	DOWN	NA	NA	NA	NA	NA	NA	NA	NA	NA
gene7024	17352600	CHLNCDRAFT_53960	1496.64	231.77	0.15486	-2.69096	1.78959e-20	2.91947e-18	DOWN	NA	NA	NA	NA	NA	NA	NA	NA	NA
gene6696	17352871	CHLNCDRAFT_53751	869.496	137.728	0.1584	-2.65836	1.50694e-20	2.50073e-18	DOWN	NA	NA	NA	NA	NA	NA	NA	NA	NA
gene3511	17356186	CHLNCDRAFT_144351	548.617	73.4506	0.133883	-2.90095	2.20456e-21	3.92943e-19	DOWN	NA	NA	NA	NA	NA	NA	NA	NA	NA
gene4440	17354948	CHLNCDRAFT_133729	3318.04	387.016	0.11664	-3.09986	1.3302e-21	2.41569e-19	DOWN	NA	NA	NA	NA	NA	NA	NA	NA	NA
gene3506	17355998	CHLNCDRAFT_144346	4687.86	474.994	0.101324	-3.30295	9.61966e-22	1.81547e-19	DOWN	NA	NA	NA	NA	NA	NA	NA	NA	NA
gene307	17359441	CHLNCDRAFT_49503	597.09	79.2058	0.132653	-2.91427	5.71247e-22	1.12209e-19	DOWN	NA	NA	NA	NA	NA	NA	NA	NA	NA
gene5551	17354140	CHLNCDRAFT_8980	729.974	102.206	0.140013	-2.83636	3.65731e-22	7.33367e-20	DOWN	NA	NA	NA	NA	NA	NA	NA	NA	NA
gene9184	17350451	CHLNCDRAFT_141555	3214.94	345.082	0.107337	-3.21978	3.69769e-23	7.90894e-21	DOWN	NA	NA	NA	NA	NA	NA	NA	NA	NA
gene1132	17358829	CHLNCDRAFT_138131	1001.95	130.018	0.129766	-2.94602	5.58074e-24	1.22079e-21	DOWN	NA	NA	NA	NA	NA	NA	NA	NA	NA
gene5601	17354067	CHLNCDRAFT_135275	2291.55	257.21	0.112243	-3.1553	1.45201e-24	3.25014e-22	DOWN	NA	NA	NA	NA	NA	NA	NA	NA	NA
gene3653	17356241	CHLNCDRAFT_144543	470.127	44.1609	0.0939341	-3.41221	5.10903e-25	1.19938e-22	DOWN	NA	NA	NA	NA	NA	NA	NA	NA	NA
gene4080	17355648	CHLNCDRAFT_35227	3990.15	351.072	0.0879845	-3.50661	4.46304e-25	1.07392e-22	DOWN	NA	NA	NA	NA	NA	NA	NA	NA	NA
gene6339	17353368	CHLNCDRAFT_53482	1266.72	150.062	0.118465	-3.07747	6.94658e-26	1.7595e-23	DOWN	NA	NA	NA	NA	NA	NA	NA	NA	NA
gene6174	17353319	CHLNCDRAFT_58365	4417.21	342.313	0.0774952	-3.68975	1.67936e-26	4.61824e-24	DOWN	NA	NA	NA	NA	NA	NA	NA	NA	NA
gene4935	17354833	CHLNCDRAFT_134386	5131.34	364.81	0.0710945	-3.81412	7.59106e-27	2.14894e-24	DOWN	NA	NA	NA	NA	NA	NA	NA	NA	NA
gene2022	17357305	CHLNCDRAFT_142112	289.703	11.5434	0.0398457	-4.64943	2.53971e-27	7.4075e-25	DOWN	NA	NA	NA	NA	NA	NA	NA	NA	NA
gene6270	17353355	CHLNCDRAFT_58394	1863.87	185.449	0.099497	-3.3292	6.39616e-28	1.9859e-25	DOWN	NA	NA	NA	NA	NA	NA	NA	NA	NA
gene7555	17352124	CHLNCDRAFT_138640	465.762	32.6014	0.069996	-3.83658	4.86677e-29	1.67295e-26	DOWN	NA	NA	NA	NA	NA	NA	NA	NA	NA
gene7964	17351737	CHLNCDRAFT_139174	1837.77	173.515	0.0944163	-3.40482	4.8083e-29	1.67295e-26	DOWN	NA	NA	NA	NA	NA	NA	NA	NA	NA
gene2915	17356516	CHLNCDRAFT_143501	5500.03	301.033	0.054733	-4.19144	2.13006e-30	7.88533e-28	DOWN	Similar_to_Uncharacterized_protein_conserved_in_bacteria_with_a_cystatin-like_fold	Esi_0027_0139	Ectocarpus_siliculosus (Brown_alga) (Conferva_siliculosa)	NA	NA	NA	NA	NA	NA
gene8648	17351039	CHLNCDRAFT_55044	405.473	19.7964	0.0488231	-4.35629	1.48294e-31	6.48785e-29	DOWN	NA	NA	NA	NA	NA	NA	NA	NA	NA
gene9440	17350184	CHLNCDRAFT_142539	236.294	2.09442	0.00886361	-6.81789	7.09061e-33	3.41235e-30	DOWN	NA	NA	NA	NA	NA	NA	NA	NA	NA
gene6722	17352943	CHLNCDRAFT_53768	1266.81	105.154	0.0830067	-3.59063	3.57079e-33	1.80889e-30	DOWN	NA	NA	NA	NA	NA	NA	NA	NA	NA
gene4936	17354834	CHLNCDRAFT_134387	1240.36	93.1993	0.0751392	-3.73429	1.04614e-34	5.59395e-32	DOWN	NA	NA	NA	NA	NA	NA	NA	NA	NA
gene4941	17354794	CHLNCDRAFT_13280	1216.01	64.5081	0.0530491	-4.23653	6.06335e-42	4.16855e-39	DOWN	NA	NA	NA	NA	NA	NA	NA	NA	NA
gene6694	17352999	CHLNCDRAFT_136749	569.278	15.0676	0.0264679	-5.23961	4.8037e-47	4.20324e-44	DOWN	NA	NA	NA	NA	NA	NA	NA	NA	NA
gene3256	17356488	CHLNCDRAFT_57453	13031.6	69.383	0.00532423	-7.55321	2.02691e-59	2.16767e-56	DOWN	NA	NA	NA	NA	NA	NA	NA	NA	NA
gene9124	17350528	CHLNCDRAFT_141473	501.103	1.41571	0.00282518	-8.46744	1.54443e-62	1.85814e-59	DOWN	NA	NA	NA	NA	NA	NA	NA	NA	NA
gene9126	17350526	CHLNCDRAFT_141476	1107.9	2.58216	0.00233068	-8.74504	2.40529e-86	7.71698e-83	DOWN	NA	NA	NA	NA	NA	NA	NA	NA	NA
gene9129	17350491	CHLNCDRAFT_28362	1060.03	1.10148	0.00103911	-9.91044	1.87654e-90	9.03086e-87	DOWN	NA	NA	NA	NA	NA	NA	NA	NA	NA
gene9127	17350495	CHLNCDRAFT_141477	1156.98	1.39963	0.00120972	-9.69111	2.05521e-91	1.97814e-87	DOWN	NA	NA	NA	NA	NA	NA	NA	NA	NA
gene4815	17354808	CHLNCDRAFT_52469	318.31	147.319	0.462816	-1.11149	0.000299953	0.0031691	DOWN	Glutamate_dehydrogenase	LX95_00307	Mesonia_algae	NA	nucleotide_binding [GO:0000166]; oxidoreductase_activity, acting_on_the_CH-NH2_group_of_donors, NAD_or_NADP_as_acceptor [GO:0016639]; cellular_amino_acid_metabolic_process [GO:0006520]	GO:0000166; GO:0006520; GO:0016639	GO:0000166~nucleotide_binding;GO:0016639~oxidoreductase_activity, acting_on_the_CH-NH2_group_of_donors, NAD_or_NADP_as_acceptor	GO:0006520~cellular_amino_acid_metabolic_process	NA
gene2132	17357714	CHLNCDRAFT_15266	67.8805	18.2796	0.269291	-1.89276	0.00049559	0.00488735	DOWN	C-myb-like_transcription_factor	Esi_0000_0035	Ectocarpus_siliculosus (Brown_alga) (Conferva_siliculosa)	NA	nucleus [GO:0005634]; DNA_binding [GO:0003677]	GO:0003677; GO:0005634	GO:0003677~DNA_binding	NA	GO:0005634~nucleus
gene3908	17355533	CHLNCDRAFT_144939	361.393	40.565	0.112246	-3.15526	2.784e-19	3.828e-17	DOWN	NF-X1_finger_and_helicase_domain_protein, putative	Esi_0011_0190	Ectocarpus_siliculosus (Brown_alga) (Conferva_siliculosa)	NA	nucleus [GO:0005634]; DNA-binding_transcription_factor_activity [GO:0003700]; helicase_activity [GO:0004386]; zinc_ion_binding [GO:0008270]	GO:0003700; GO:0004386; GO:0005634; GO:0008270	GO:0003700~sequence-specific_DNA_binding_transcription_factor_activity;GO:0004386~helicase_activity;GO:0008270~zinc_ion_binding	NA	GO:0005634~nucleus
gene9355	17350285	CHLNCDRAFT_59409	1722.63	971.484	0.563954	-0.826351	0.00406119	0.0278811	DOWN	Saccharopine_dehydrogenase	SDH_Esi_0500_0008	Ectocarpus_siliculosus (Brown_alga) (Conferva_siliculosa)	NA	oxidoreductase_activity [GO:0016491]	GO:0016491	GO:0016491~oxidoreductase_activity	NA	NA
gene4129	17355394	CHLNCDRAFT_35254	10916.7	3917.22	0.358827	-1.47864	3.11982e-05	0.000450874	DOWN	Aldo-keto_reductase	BN1012_Phect10	Candidatus_Phaeomarinobacter_ectocarpi	NA	oxidoreductase_activity [GO:0016491]	GO:0016491	GO:0016491~oxidoreductase_activity	NA	NA
gene886	17358954	CHLNCDRAFT_137844	400.553	155.726	0.388777	-1.36299	3.15353e-06	5.87094e-05	DOWN	Autophagy_protein_5	Atg5_Esi_0211_0036	Ectocarpus_siliculosus (Brown_alga) (Conferva_siliculosa)	NA	phagophore_assembly_site_membrane [GO:0034045]; autophagy [GO:0006914]	GO:0006914; GO:0034045	NA	GO:0006914~autophagy	GO:0034045~pre-autophagosomal_structure_membrane
gene8536	17351126	CHLNCDRAFT_139942	3753.23	781.746	0.208286	-2.26336	2.99299e-12	1.77824e-10	DOWN	Uncharacterized_protein	Esi_0009_0207	Ectocarpus_siliculosus (Brown_alga) (Conferva_siliculosa)	NA	protein_serine/threonine_phosphatase_activity [GO:0004722]	GO:0004722	GO:0004722~protein_serine/threonine_phosphatase_activity	NA	NA
gene928	17358883	CHLNCDRAFT_137888	1993.03	1013.65	0.508598	-0.975403	0.000925689	0.00829586	DOWN	C1, subunit_of_the_circadian_RNA-binding_protein_CHLAMY1	CRB1	Yamagishiella_unicocca	NA	RNA_binding [GO:0003723]	GO:0003723	GO:0003723~RNA_binding	NA	NA
gene3894	17355624	CHLNCDRAFT_35116	548.843	279.704	0.509624	-0.972495	0.000326966	0.0034289	DOWN	Uncharacterized_protein	Esi_0008_0228	Ectocarpus_siliculosus (Brown_alga) (Conferva_siliculosa)	NA	RNA_binding [GO:0003723]	GO:0003723	GO:0003723~RNA_binding	NA	NA
gene4730	17354954	CHLNCDRAFT_31155	2315.11	1196.64	0.51688	-0.952099	0.00149143	0.0121447	DOWN	S9_family_peptidase	BKP44_07925	Formosa_algae	NA	serine-type_peptidase_activity [GO:0008236]	GO:0008236	GO:0008236~serine-type_peptidase_activity	NA	NA
gene4143	17355217	CHLNCDRAFT_14001	549.75	294.007	0.534802	-0.902924	0.00100721	0.00880509	DOWN	Uncharacterized_protein (TIGR00369_family)	LX95_02790	Mesonia_algae	NA	thiolester_hydrolase_activity [GO:0016790]	GO:0016790	GO:0016790~thiolester_hydrolase_activity	NA	NA
gene9724	17349898	CHLNCDRAFT_142667	18.6249	1.11756	0.0600037	-4.05881	4.15721e-05	0.000579062	DOWN	WD_repeat, SAM_and_U-box_domain_containing_1	Esi_0147_0081	Ectocarpus_siliculosus (Brown_alga) (Conferva_siliculosa)	NA	ubiquitin-protein_transferase_activity [GO:0004842]	GO:0004842	GO:0004842~ubiquitin-protein_transferase_activity	NA	NA
gene5981	17353716	CHLNCDRAFT_14744	244.169	93.3072	0.382143	-1.38782	5.27838e-05	0.000714548	DOWN	Alpha-1,3-mannosyl-glycoprotein_2-beta-N-acetylglucosaminyltransferase, family_GT13 (EC_2.4.1.101)	GnT1_Esi_0333_0017	Ectocarpus_siliculosus (Brown_alga) (Conferva_siliculosa)	N-Glycan_biosynthesis [00510]; Glycosyltransferases [01003]	alpha-1,3-mannosylglycoprotein_2-beta-N-acetylglucosaminyltransferase_activity [GO:0003827]; protein_glycosylation [GO:0006486]	GO:0003827; GO:0006486	GO:0003827~alpha-1,3-mannosylglycoprotein_2-beta-N-acetylglucosaminyltransferase_activity	GO:0006486~protein_glycosylation	NA
gene5296	17354455	CHLNCDRAFT_24350	352.922	201.856	0.571958	-0.806018	0.00531112	0.0343487	DOWN	Uncharacterized_protein	Esi_0116_0039	Ectocarpus_siliculosus (Brown_alga) (Conferva_siliculosa)	One_carbon_pool_by_folate [00670]	ATP_binding [GO:0005524]; formate-tetrahydrofolate_ligase_activity [GO:0004329]	GO:0004329; GO:0005524	GO:0004329~formate-tetrahydrofolate_ligase_activity;GO:0005524~ATP_binding	NA	NA
gene8542	17351131	CHLNCDRAFT_59172	2387.41	1375.93	0.576327	-0.79504	0.00809477	0.0477989	DOWN	Probable_membrane-associated_30_kDa_protein, chloroplast	Esi_0211_0017	Ectocarpus_siliculosus (Brown_alga) (Conferva_siliculosa)	Others[99998]	NA	NA	NA	NA	NA
gene1596	17358176	CHLNCDRAFT_140697	1127.98	671.799	0.595577	-0.74764	0.00602474	0.0378821	DOWN	Methylthioribose-1-phosphate_isomerase (M1Pi) (MTR-1-P_isomerase) (EC_5.3.1.23) (S-methyl-5-thioribose-1-phosphate_isomerase) (Translation_initiation_factor_eIF-2B_subunit_alpha/beta/delta-like_protein)	EIF2B-like_Esi_0025_0052	Ectocarpus_siliculosus (Brown_alga) (Conferva_siliculosa)	PATHWAY: Amino-acid_biosynthesis; L-methionine_biosynthesis_via_salvage_pathway; L-methionine_from_S-methyl-5-thio-alpha-D-ribose_1-phosphate: step_1/6. {ECO:0000256|HAMAP-Rule:MF_03119}.; Cysteine_and_methionine_metabolism [00270]	cytoplasm [GO:0005737]; nucleus [GO:0005634]; S-methyl-5-thioribose-1-phosphate_isomerase_activity [GO:0046523]; translation_initiation_factor_activity [GO:0003743]; L-methionine_salvage_from_methylthioadenosine [GO:0019509]; L-methionine_salvage_from_S-adenosylmethionine [GO:0019284]	GO:0003743; GO:0005634; GO:0005737; GO:0019284; GO:0019509; GO:0046523	GO:0003743~translation_initiation_factor_activity;GO:0046523~S-methyl-5-thioribose-1-phosphate_isomerase_activity	GO:0019284~L-methionine_biosynthetic_process_from_S-adenosylmethionine;GO:0019509~L-methionine_biosynthetic_process_from_methylthioadenosine	GO:0005634~nucleus;GO:0005737~cytoplasm
gene1586	17358061	CHLNCDRAFT_140686	1351.99	632.267	0.467656	-1.09648	7.71736e-05	0.000995705	DOWN	Probable_protein_kinase_UbiB (EC_2.7.-.-)	phytr_8980	Candidatus_Phycorickettsia_trachydisci	PATHWAY: Cofactor_biosynthesis; ubiquinone_biosynthesis [regulation]. {ECO:0000256|SAAS:SAAS00756155}.; Protein_kinases [01001]	integral_component_of_membrane [GO:0016021]; plasma_membrane [GO:0005886]; ATP_binding [GO:0005524]; protein_kinase_activity [GO:0004672]; ubiquinone_biosynthetic_process [GO:0006744]	GO:0004672; GO:0005524; GO:0005886; GO:0006744; GO:0016021	GO:0004672~protein_kinase_activity;GO:0005524~ATP_binding	GO:0006744~ubiquinone_biosynthetic_process	GO:0005886~plasma_membrane;GO:0016021~integral_component_of_membrane
gene5862	17353549	CHLNCDRAFT_58262	3776.32	1029.45	0.272608	-1.8751	5.49289e-09	1.87479e-07	DOWN	Glycogen_synthase (EC_2.4.1.21) (Starch [bacterial_glycogen] synthase)	glgA_DIS18_05265	Algibacter_sp. ZY111	PATHWAY: Glycan_biosynthesis; glycogen_biosynthesis. {ECO:0000256|HAMAP-Rule:MF_00484}.; Starch_and_sucrose_metabolism [00500]; Glycosyltransferases [01003]	alpha-1,4-glucan_synthase_activity [GO:0033201]; glycogen (starch) synthase_activity [GO:0004373]; starch_synthase_activity [GO:0009011]; glycogen_biosynthetic_process [GO:0005978]	GO:0004373; GO:0005978; GO:0009011; GO:0033201	GO:0004373~glycogen (starch) synthase_activity;GO:0009011~starch_synthase_activity;GO:0033201~alpha-1,4-glucan_synthase_activity	GO:0005978~glycogen_biosynthetic_process	NA
gene2741	17356813	CHLNCDRAFT_57315	430.619	260.718	0.60545	-0.723921	0.00825586	0.0485713	DOWN	Mg-protoporphyrin_IX_chelatase (EC_6.6.1.1)	CHLD_Esi_0055_0038	Ectocarpus_siliculosus (Brown_alga) (Conferva_siliculosa)	PATHWAY: Porphyrin-containing_compound_metabolism; chlorophyll_biosynthesis. {ECO:0000256|RuleBase:RU362087}.; Porphyrin_and_chlorophyll_metabolism [00860]	chloroplast [GO:0009507]; ATP_binding [GO:0005524]; magnesium_chelatase_activity [GO:0016851]; chlorophyll_biosynthetic_process [GO:0015995]; photosynthesis [GO:0015979]	GO:0005524; GO:0009507; GO:0015979; GO:0015995; GO:0016851	GO:0005524~ATP_binding;GO:0016851~magnesium_chelatase_activity	GO:0015979~photosynthesis;GO:0015995~chlorophyll_biosynthetic_process	GO:0009507~chloroplast
gene3151	17356431	CHLNCDRAFT_143829	1393.8	647.163	0.464315	-1.10683	7.35656e-05	0.000958144	DOWN	Mg-protoporphyrin_IX_chelatase (EC_6.6.1.1)	chlI	Neodangemannia_microcystis	PATHWAY: Porphyrin-containing_compound_metabolism; chlorophyll_biosynthesis. {ECO:0000256|RuleBase:RU362087}.; Porphyrin_and_chlorophyll_metabolism [00860]	chloroplast [GO:0009507]; ATP_binding [GO:0005524]; magnesium_chelatase_activity [GO:0016851]; chlorophyll_biosynthetic_process [GO:0015995]; photosynthesis [GO:0015979]	GO:0005524; GO:0009507; GO:0015979; GO:0015995; GO:0016851	GO:0005524~ATP_binding;GO:0016851~magnesium_chelatase_activity	GO:0015979~photosynthesis;GO:0015995~chlorophyll_biosynthetic_process	GO:0009507~chloroplast
gene2355	17357094	CHLNCDRAFT_57181	1932.97	950.739	0.491854	-1.0237	0.00044729	0.0044986	DOWN	Signal_peptide_peptidase	signal_Esi_0010_0018	Ectocarpus_siliculosus (Brown_alga) (Conferva_siliculosa)	Peptidases [01002]	peptidase_activity [GO:0008233]	GO:0008233	GO:0008233~peptidase_activity	NA	NA
gene4125	17355337	CHLNCDRAFT_30937	2341.1	836.7	0.357396	-1.48441	6.92623e-07	1.53961e-05	DOWN	Carboxyl-terminal_processing_protease	LX95_00187	Mesonia_algae	Peptidases [01002]	serine-type_peptidase_activity [GO:0008236]	GO:0008236	GO:0008236~serine-type_peptidase_activity	NA	NA
gene1091	17358699	CHLNCDRAFT_33910	11465.3	4369.26	0.381087	-1.39181	8.8447e-05	0.00112013	DOWN	Superoxide_dismutase (EC_1.15.1.1)	MnSOD	Chlamydomonas_sp. ICE-L	Peroxisome [04146]	metal_ion_binding [GO:0046872]; superoxide_dismutase_activity [GO:0004784]	GO:0004784; GO:0046872	GO:0004784~superoxide_dismutase_activity;GO:0046872~metal_ion_binding	NA	NA
gene9738	17349884	CHLNCDRAFT_29092	367.927	201.523	0.547727	-0.868471	0.00243341	0.0184132	DOWN	Glutamyl-tRNA_Synthetase, chloroplast (EC_6.1.1.24)	GTS_Esi_0094_0037	Ectocarpus_siliculosus (Brown_alga) (Conferva_siliculosa)	Porphyrin_and_chlorophyll_metabolism [00860]; Amino_acid_related_enzymes [01007]; Aminoacyl-tRNA_biosynthesis [00970]; Transfer_RNA_biogenesis [03016]; Prokaryotic_defense_system [02048]	ATP_binding [GO:0005524]; glutamate-tRNA_ligase_activity [GO:0004818]; glutamate-tRNA(Gln) ligase_activity [GO:0050561]; tRNA_binding [GO:0000049]; zinc_ion_binding [GO:0008270]; glutamyl-tRNA_aminoacylation [GO:0006424]	GO:0000049; GO:0004818; GO:0005524; GO:0006424; GO:0008270; GO:0050561	GO:0000049~tRNA_binding;GO:0004818~glutamate-tRNA_ligase_activity;GO:0005524~ATP_binding;GO:0008270~zinc_ion_binding;GO:0050561~glutamate-tRNA(Gln) ligase_activity	GO:0006424~glutamyl-tRNA_aminoacylation	NA
gene5293	17354355	CHLNCDRAFT_134869	1335.27	635.312	0.475792	-1.0716	0.000116745	0.0014152	DOWN	Glutamyl-tRNA_Synthetase, chloroplast (EC_6.1.1.24)	GTS_Esi_0094_0037	Ectocarpus_siliculosus (Brown_alga) (Conferva_siliculosa)	Porphyrin_and_chlorophyll_metabolism [00860]; Amino_acid_related_enzymes [01007]; Aminoacyl-tRNA_biosynthesis [00970]; Transfer_RNA_biogenesis [03016]; Prokaryotic_defense_system [02048]	ATP_binding [GO:0005524]; glutamate-tRNA_ligase_activity [GO:0004818]; glutamate-tRNA(Gln) ligase_activity [GO:0050561]; tRNA_binding [GO:0000049]; zinc_ion_binding [GO:0008270]; glutamyl-tRNA_aminoacylation [GO:0006424]	GO:0000049; GO:0004818; GO:0005524; GO:0006424; GO:0008270; GO:0050561	GO:0000049~tRNA_binding;GO:0004818~glutamate-tRNA_ligase_activity;GO:0005524~ATP_binding;GO:0008270~zinc_ion_binding;GO:0050561~glutamate-tRNA(Gln) ligase_activity	GO:0006424~glutamyl-tRNA_aminoacylation	NA
gene2982	17356634	CHLNCDRAFT_34863	1944.25	1070.48	0.550587	-0.860958	0.00335956	0.0240113	DOWN	Chlorophyll_synthase, putative_chloroplast	CHS_Esi_0063_0045	Ectocarpus_siliculosus (Brown_alga) (Conferva_siliculosa)	Porphyrin_and_chlorophyll_metabolism [00860]; Prenyltransferases [01006]	integral_component_of_membrane [GO:0016021]; chlorophyll_synthetase_activity [GO:0046408]; chlorophyll_biosynthetic_process [GO:0015995]	GO:0015995; GO:0016021; GO:0046408	GO:0046408~chlorophyll_synthetase_activity	GO:0015995~chlorophyll_biosynthetic_process	GO:0016021~integral_component_of_membrane
gene4380	17355354	CHLNCDRAFT_15246	77.3932	24.5132	0.316736	-1.65865	0.00125775	0.0105177	DOWN	Putative_34kDa_cdc2-related_protein_kinase (EC_2.7.11.22)	CDKA_Esi_0037_0007	Ectocarpus_siliculosus (Brown_alga) (Conferva_siliculosa)	Protein_kinases [01001]	ATP_binding [GO:0005524]; cyclin-dependent_protein_serine/threonine_kinase_activity [GO:0004693]	GO:0004693; GO:0005524	GO:0004693~cyclin-dependent_protein_serine/threonine_kinase_activity;GO:0005524~ATP_binding	NA	NA
gene3137	17356649	CHLNCDRAFT_6687	1099.01	178.626	0.162533	-2.62119	5.19517e-20	8.06508e-18	DOWN	Aureochrome4	aureo4	Heterosigma_akashiwo (Chromophytic_alga) (Heterosigma_carterae)	Protein_kinases [01001]	DNA-binding_transcription_factor_activity [GO:0003700]	GO:0003700	GO:0003700~sequence-specific_DNA_binding_transcription_factor_activity	NA	NA
gene6054	17353744	CHLNCDRAFT_24990	435.413	229.639	0.527406	-0.923014	0.000980609	0.00867941	DOWN	Protein_kinase:ABC1_family	Esi_0028_0072	Ectocarpus_siliculosus (Brown_alga) (Conferva_siliculosa)	Protein_kinases [01001]	kinase_activity [GO:0016301]	GO:0016301	GO:0016301~kinase_activity	NA	NA
gene4002	17355851	CHLNCDRAFT_30865	2552.28	1094.59	0.428866	-1.2214	5.22466e-05	0.000708272	DOWN	LRR-GTPase_of_the_ROCO_family	Esi_0264_0029	Ectocarpus_siliculosus (Brown_alga) (Conferva_siliculosa)	Protein_kinases [01001]; MAPK_signaling_pathway - plant [04016]	NA	NA	NA	NA	NA
gene7159	17352412	CHLNCDRAFT_36647	2097.49	1017.18	0.48495	-1.04409	0.000399564	0.00407395	DOWN	Non-specific_serine/threonine_protein_kinase (EC_2.7.11.1)	S6K_Esi_0003_0265	Ectocarpus_siliculosus (Brown_alga) (Conferva_siliculosa)	Protein_kinases [01001]; Membrane_trafficking [04131]	ATP_binding [GO:0005524]; protein_serine/threonine_kinase_activity [GO:0004674]	GO:0004674; GO:0005524	GO:0004674~protein_serine/threonine_kinase_activity;GO:0005524~ATP_binding	NA	NA
gene5418	17354419	CHLNCDRAFT_135009	1210.43	641.789	0.530214	-0.915355	0.000884208	0.00802878	DOWN	Protein_phospatase_2C	EMTp03	Eudorina_sp. NIES-3984	Protein_phosphatases_and_associated_proteins [01009]	catalytic_activity [GO:0003824]	GO:0003824	GO:0003824~catalytic_activity	NA	NA
gene7362	17352326	CHLNCDRAFT_58743	1172.35	696.983	0.594517	-0.75021	0.00607659	0.0381025	DOWN	Catalytic/ hydrolase/ phosphoglycolate_phosphatase/ phosphoric_monoester_hydrolase	Esi_0130_0079	Ectocarpus_siliculosus (Brown_alga) (Conferva_siliculosa)	Protein_phosphatases_and_associated_proteins [01009]; Glyoxylate_and_dicarboxylate_metabolism [00630]	phosphatase_activity [GO:0016791]	GO:0016791	GO:0016791~phosphatase_activity	NA	NA
gene2910	17356565	CHLNCDRAFT_143495	1884.53	677.401	0.359454	-1.47612	3.74733e-07	8.7121e-06	DOWN	Guanosine_polyphosphate_pyrophosphohydrolases/synthetases	Esi_0112_0026	Ectocarpus_siliculosus (Brown_alga) (Conferva_siliculosa)	Purine_metabolism [00230]	chloroplast [GO:0009507]; hydrolase_activity [GO:0016787]; guanosine_tetraphosphate_metabolic_process [GO:0015969]	GO:0009507; GO:0015969; GO:0016787	GO:0016787~hydrolase_activity	GO:0015969~guanosine_tetraphosphate_metabolic_process	GO:0009507~chloroplast
gene9300	17350361	CHLNCDRAFT_141713	1138.79	656.874	0.576818	-0.793812	0.00343022	0.024348	DOWN	UMP-CMP_kinase (EC_2.7.4.14) (Deoxycytidylate_kinase) (CK) (dCMP_kinase) (Uridine_monophosphate/cytidine_monophosphate_kinase) (UMP/CMP_kinase) (UMP/CMPK)	Esi_0189_0070	Ectocarpus_siliculosus (Brown_alga) (Conferva_siliculosa)	Pyrimidine_metabolism [00240]	cytoplasm [GO:0005737]; nucleus [GO:0005634]; ATP_binding [GO:0005524]; calmodulin_binding [GO:0005516]; calmodulin-dependent_protein_kinase_activity [GO:0004683]; cytidylate_kinase_activity [GO:0004127]; uridylate_kinase_activity [GO:0009041]; 'de_novo' pyrimidine_nucleobase_biosynthetic_process [GO:0006207]; pyrimidine_nucleotide_biosynthetic_process [GO:0006221]	GO:0004127; GO:0004683; GO:0005516; GO:0005524; GO:0005634; GO:0005737; GO:0006207; GO:0006221; GO:0009041	GO:0004127~cytidylate_kinase_activity;GO:0004683~calmodulin-dependent_protein_kinase_activity;GO:0005516~calmodulin_binding;GO:0005524~ATP_binding;GO:0009041~uridylate_kinase_activity	GO:0006207~'de_novo' pyrimidine_nucleobase_biosynthetic_process;GO:0006221~pyrimidine_nucleotide_biosynthetic_process	GO:0005634~nucleus;GO:0005737~cytoplasm
gene1249	17358133	CHLNCDRAFT_59566	4757.6	2300.3	0.4835	-1.04841	0.00154421	0.0125004	DOWN	Malate_dehydrogenase (EC_1.1.1.37)	mdh_BFS86_18560	Shewanella_algae	Pyruvate_metabolism [00620]; Glyoxylate_and_dicarboxylate_metabolism [00630]; Cysteine_and_methionine_metabolism [00270]; Carbon_fixation_in_photosynthetic_organisms [00710]; Citrate_cycle (TCA_cycle) [00020]	L-malate_dehydrogenase_activity [GO:0030060]; carbohydrate_metabolic_process [GO:0005975]; malate_metabolic_process [GO:0006108]; tricarboxylic_acid_cycle [GO:0006099]	GO:0005975; GO:0006099; GO:0006108; GO:0030060	GO:0030060~L-malate_dehydrogenase_activity	GO:0005975~carbohydrate_metabolic_process;GO:0006099~tricarboxylic_acid_cycle;GO:0006108~malate_metabolic_process	NA
gene4623	17354890	CHLNCDRAFT_23377	1052.93	553.858	0.526018	-0.926815	0.000705103	0.00661463	DOWN	Putative_phosphatase_YqaB	yqaB_REIFOR_01875	Reinekea_forsetii	Riboflavin_metabolism [00740]	hydrolase_activity [GO:0016787]	GO:0016787	GO:0016787~hydrolase_activity	NA	NA
gene7195	17352408	CHLNCDRAFT_137429	1013.29	551.532	0.544295	-0.877538	0.00119	0.0100472	DOWN	GTPase_HflX (GTP-binding_protein_HflX)	hlfX_hflX_REIFOR_00906	Reinekea_forsetii	Ribosome_biogenesis [03009]	cytoplasm [GO:0005737]; GTP_binding [GO:0005525]; GTPase_activity [GO:0003924]	GO:0003924; GO:0005525; GO:0005737	GO:0003924~GTPase_activity;GO:0005525~GTP_binding	NA	GO:0005737~cytoplasm
gene7200	17352427	CHLNCDRAFT_137436	4695.13	2502.97	0.533099	-0.907524	0.00637103	0.039562	DOWN	Heat_shock_protein_70	Hsp_Esi_0010_0066	Ectocarpus_siliculosus (Brown_alga) (Conferva_siliculosa)	RNA_degradation [03018]; Mitochondrial_biogenesis [03029]; Exosome [04147]; Messenger_RNA_biogenesis [03019]; Chaperones_and_folding_catalysts [03110]	ATP_binding [GO:0005524]; unfolded_protein_binding [GO:0051082]; protein_folding [GO:0006457]	GO:0005524; GO:0006457; GO:0051082	GO:0005524~ATP_binding;GO:0051082~unfolded_protein_binding	GO:0006457~protein_folding	NA
gene8134	17351623	CHLNCDRAFT_139411	803.453	426.723	0.531111	-0.912914	0.000680846	0.00641208	DOWN	Signal_recognition_particle_receptor_FtsY (SRP_receptor)	ftsY_LX95_02284	Mesonia_algae	Secretion_system [02044]; Protein_export [03060]	cytoplasm [GO:0005737]; intrinsic_component_of_plasma_membrane [GO:0031226]; GTP_binding [GO:0005525]; GTPase_activity [GO:0003924]; SRP-dependent_cotranslational_protein_targeting_to_membrane [GO:0006614]	GO:0003924; GO:0005525; GO:0005737; GO:0006614; GO:0031226	GO:0003924~GTPase_activity;GO:0005525~GTP_binding	GO:0006614~SRP-dependent_cotranslational_protein_targeting_to_membrane	GO:0005737~cytoplasm;GO:0031226~intrinsic_component_of_plasma_membrane
gene3625	17356238	CHLNCDRAFT_21935	1760.74	939.934	0.533827	-0.905555	0.00159355	0.0128458	DOWN	SRP101, alpha_subunit_of_the_signal_recognition_particle_receptor	SRP101_Esi_0208_0009	Ectocarpus_siliculosus (Brown_alga) (Conferva_siliculosa)	Secretion_system [02044]; Protein_export [03060]	signal_recognition_particle_receptor_complex [GO:0005785]; GTP_binding [GO:0005525]; GTPase_activity [GO:0003924]; signal_recognition_particle_binding [GO:0005047]; SRP-dependent_cotranslational_protein_targeting_to_membrane [GO:0006614]	GO:0003924; GO:0005047; GO:0005525; GO:0005785; GO:0006614	GO:0003924~GTPase_activity;GO:0005047~signal_recognition_particle_binding;GO:0005525~GTP_binding	GO:0006614~SRP-dependent_cotranslational_protein_targeting_to_membrane	GO:0005785~signal_recognition_particle_receptor_complex
gene1571	17357985	CHLNCDRAFT_48545	1463.39	772.117	0.527621	-0.922426	0.000982013	0.00867941	DOWN	Cystathionine_beta-lyase (EC_4.4.1.8)	CBL1_Esi_0153_0045	Ectocarpus_siliculosus (Brown_alga) (Conferva_siliculosa)	Selenocompound_metabolism [00450]; Cysteine_and_methionine_metabolism [00270]	cystathionine_beta-lyase_activity [GO:0004121]; pyridoxal_phosphate_binding [GO:0030170]	GO:0004121; GO:0030170	GO:0004121~cystathionine_beta-lyase_activity;GO:0030170~pyridoxal_phosphate_binding	NA	NA
gene5141	17354249	CHLNCDRAFT_134697	2145.86	1105.32	0.515096	-0.957087	0.00126332	0.0105551	DOWN	Uncharacterized_protein	Esi_0504_0007	Ectocarpus_siliculosus (Brown_alga) (Conferva_siliculosa)	Spliceosome [03040]; Messenger_RNA_biogenesis [03019]; Spliceosome [03041]	RNA_processing [GO:0006396]	GO:0006396	NA	GO:0006396~RNA_processing	NA
gene697	17358781	CHLNCDRAFT_137613	3350.83	1667.72	0.497702	-1.00665	0.00148212	0.0120791	DOWN	Uncharacterized_protein	Esi_0427_0015	Ectocarpus_siliculosus (Brown_alga) (Conferva_siliculosa)	Spliceosome [03040]; Spliceosome [03041]	ATP_binding [GO:0005524]; helicase_activity [GO:0004386]	GO:0004386; GO:0005524	GO:0004386~helicase_activity;GO:0005524~ATP_binding	NA	NA
gene1285	17357899	CHLNCDRAFT_20050	148.23	57.2801	0.386427	-1.37173	0.000815939	0.00752708	DOWN	Uncharacterized_protein	Esi_0003_0226	Ectocarpus_siliculosus (Brown_alga) (Conferva_siliculosa)	Spliceosome [03041]	RNA_binding [GO:0003723]	GO:0003723	GO:0003723~RNA_binding	NA	NA
gene9437	17350167	CHLNCDRAFT_59438	1045.55	602.993	0.576724	-0.794048	0.00304212	0.0222318	DOWN	Conserved_C2H2_zinc_finger_protein	Esi_0059_0117	Ectocarpus_siliculosus (Brown_alga) (Conferva_siliculosa)	Spliceosome [03041]; Spliceosome [03040]	spliceosomal_complex [GO:0005681]; nucleic_acid_binding [GO:0003676]; zinc_ion_binding [GO:0008270]; mRNA_splicing, via_spliceosome [GO:0000398]	GO:0000398; GO:0003676; GO:0005681; GO:0008270	GO:0003676~nucleic_acid_binding;GO:0008270~zinc_ion_binding	GO:0000398~mRNA_splicing, via_spliceosome	GO:0005681~spliceosomal_complex
gene6777	17352996	ADHE2	2147.13	1123.6	0.523305	-0.934275	0.00168839	0.0135085	DOWN	Aldehyde-alcohol_dehydrogenase	EEY24_13550	Shewanella_algae	Starch_and_sucrose_metabolism [00500]	acetaldehyde_dehydrogenase (acetylating) activity [GO:0008774]; alcohol_dehydrogenase (NAD) activity [GO:0004022]	GO:0004022; GO:0008774	GO:0004022~alcohol_dehydrogenase (NAD) activity;GO:0008774~acetaldehyde_dehydrogenase (acetylating) activity	NA	NA
gene5230	17354538	CHLNCDRAFT_31463	186744	44967.9	0.2408	-2.0541	2.1855e-11	1.13705e-09	DOWN	Elongation_factor_EF-3	Esi_0003_0273	Ectocarpus_siliculosus (Brown_alga) (Conferva_siliculosa)	Translation_factors [03012]	ATP_binding [GO:0005524]; ATPase_activity [GO:0016887]; translation_elongation_factor_activity [GO:0003746]	GO:0003746; GO:0005524; GO:0016887	GO:0003746~translation_elongation_factor_activity;GO:0005524~ATP_binding;GO:0016887~ATPase_activity	NA	NA
gene3461	17356340	CHLNCDRAFT_21860	42.5001	10.0513	0.236501	-2.08008	0.00101134	0.00882512	DOWN	Uncharacterized_protein	BKP44_14320	Formosa_algae	Transporters [02000]	integral_component_of_membrane [GO:0016021]	GO:0016021	NA	NA	GO:0016021~integral_component_of_membrane
gene5946	17353620	CHLNCDRAFT_36096	5395	2644.65	0.490203	-1.02855	0.00231849	0.0176967	DOWN	Ammonium_transporter	Amt1;4_Esi_0526_0006	Ectocarpus_siliculosus (Brown_alga) (Conferva_siliculosa)	Transporters [02000]	integral_component_of_membrane [GO:0016021]; ammonium_transmembrane_transporter_activity [GO:0008519]	GO:0008519; GO:0016021	GO:0008519~ammonium_transmembrane_transporter_activity	NA	GO:0016021~integral_component_of_membrane
gene513	17359490	CHLNCDRAFT_56592	3715.53	1090.8	0.293579	-1.76818	3.40518e-08	1.01157e-06	DOWN	Ammonium_transporter	Esi_0047_0002	Ectocarpus_siliculosus (Brown_alga) (Conferva_siliculosa)	Transporters [02000]	integral_component_of_membrane [GO:0016021]; ammonium_transmembrane_transporter_activity [GO:0008519]	GO:0008519; GO:0016021	GO:0008519~ammonium_transmembrane_transporter_activity	NA	GO:0016021~integral_component_of_membrane
gene2966	17356652	CHLNCDRAFT_143568	1333.25	481.001	0.360772	-1.47084	1.14855e-07	3.01221e-06	DOWN	Vacuolar-type_H-translocating_inorganic_pyrophosphatase	Esi_0008_0113	Ectocarpus_siliculosus (Brown_alga) (Conferva_siliculosa)	Transporters [02000]	integral_component_of_membrane [GO:0016021]; hydrogen-translocating_pyrophosphatase_activity [GO:0009678]; inorganic_diphosphatase_activity [GO:0004427]; proton_transmembrane_transport [GO:1902600]	GO:0004427; GO:0009678; GO:0016021; GO:1902600	GO:0004427~inorganic_diphosphatase_activity;GO:0009678~hydrogen-translocating_pyrophosphatase_activity	GO:1902600~hydrogen_ion_transmembrane_transport	GO:0016021~integral_component_of_membrane
gene7455	17352237	CHLNCDRAFT_58775	3131.87	1523.45	0.486435	-1.03968	0.000936975	0.0083814	DOWN	Uncharacterized_protein	Esi_0455_0017	Ectocarpus_siliculosus (Brown_alga) (Conferva_siliculosa)	Transporters [02000]; ABC_transporters [02010]	integral_component_of_membrane [GO:0016021]; ATP_binding [GO:0005524]; ATPase_activity, coupled_to_transmembrane_movement_of_substances [GO:0042626]	GO:0005524; GO:0016021; GO:0042626	GO:0005524~ATP_binding;GO:0042626~ATPase_activity, coupled_to_transmembrane_movement_of_substances	NA	GO:0016021~integral_component_of_membrane
gene4355	17355438	CHLNCDRAFT_52158	1949.11	705.103	0.361756	-1.46691	4.94957e-07	1.13158e-05	DOWN	Multidrug_resistance-associated_protein	NA	Yamagishiella_unicocca	Transporters [02000]; ABC_transporters [02010]	integral_component_of_membrane [GO:0016021]; ATP_binding [GO:0005524]; ATPase_activity, coupled_to_transmembrane_movement_of_substances [GO:0042626]	GO:0005524; GO:0016021; GO:0042626	GO:0005524~ATP_binding;GO:0042626~ATPase_activity, coupled_to_transmembrane_movement_of_substances	NA	GO:0016021~integral_component_of_membrane
gene834	17358739	CHLNCDRAFT_137782	781.92	472.897	0.604789	-0.725496	0.00681031	0.0415922	DOWN	Protein_PHYLLO, chloroplastic [Includes: Inactive_isochorismate_synthase (MENF); 2-succinyl-5-enolpyruvyl-6-hydroxy-3-cyclohexene-1-carboxylate_synthase (EC_2.2.1.9) (MEND); o-succinylbenzoate_synthase (EC_4.2.1.113) (MENC); 2-succinyl-6-hydroxy-2,4-cyclohexadiene-1-carboxylate_synthase (EC_4.2.99.20) (MENH)]	PHYLLO_At1g68890/At1g68900_T6L1.7/T6L1.8	Arabidopsis_thaliana (Mouse-ear_cress)	Ubiquinone_and_other_terpenoid-quinone_biosynthesis [00130]	chloroplast_membrane [GO:0031969]; integral_component_of_membrane [GO:0016021]; 2-succinyl-5-enolpyruvyl-6-hydroxy-3-cyclohexene-1-carboxylic-acid_synthase_activity [GO:0070204]; 2-succinyl-6-hydroxy-2,4-cyclohexadiene-1-carboxylate_synthase_activity [GO:0070205]; metal_ion_binding [GO:0046872]; thiamine_pyrophosphate_binding [GO:0030976]; cellular_amino_acid_catabolic_process [GO:0009063]; menaq…	GO:0009063; GO:0009234; GO:0016021; GO:0030976; GO:0031969; GO:0042372; GO:0042550; GO:0046872; GO:0070204; GO:0070205	GO:0030976~thiamine_pyrophosphate_binding;GO:0046872~metal_ion_binding;GO:0070204~2-succinyl-5-enolpyruvyl-6-hydroxy-3-cyclohexene-1-carboxylic-acid_synthase_activity;GO:0070205~2-succinyl-6-hydroxy-2,4-cyclohexadiene-1-carboxylate_synthase_activity	GO:0009063~cellular_amino_acid_catabolic_process;GO:0009234~menaquinone_biosynthetic_process;GO:0042372~phylloquinone_biosynthetic_process;GO:0042550~photosystem_I_stabilization	GO:0016021~integral_component_of_membrane;GO:0031969~chloroplast_membrane
gene7738	17351913	CHLNCDRAFT_10657	981.715	592.45	0.603484	-0.728612	0.0077933	0.0464298	DOWN	Uncharacterized_protein	Esi_0064_0017	Ectocarpus_siliculosus (Brown_alga) (Conferva_siliculosa)	Ubiquitin_mediated_proteolysis [04120]; Membrane_trafficking [04131]; Ubiquitin_system [04121]	NA	NA	NA	NA	NA
gene2691	17357006	CHLNCDRAFT_10671	533.789	197.795	0.37055	-1.43226	3.50164e-07	8.16061e-06	DOWN	Uncharacterized_protein	Esi_0168_0072	Ectocarpus_siliculosus (Brown_alga) (Conferva_siliculosa)	Ubiquitin_mediated_proteolysis [04120]; Ubiquitin_system [04121]	NA	NA	NA	NA	NA
gene2690	17356866	CHLNCDRAFT_21324	913.111	313.283	0.343094	-1.54332	1.69349e-08	5.26636e-07	DOWN	Uncharacterized_protein	Esi_0302_0017	Ectocarpus_siliculosus (Brown_alga) (Conferva_siliculosa)	Ubiquitin_mediated_proteolysis [04120]; Ubiquitin_system [04121]	ubiquitin-protein_transferase_activity [GO:0004842]	GO:0004842	GO:0004842~ubiquitin-protein_transferase_activity	NA	NA
gene2807	17356992	CHLNCDRAFT_12197	238.646	130.321	0.546087	-0.872797	0.00724015	0.0437729	DOWN	Uncharacterized_protein	Esi_0096_0018	Ectocarpus_siliculosus (Brown_alga) (Conferva_siliculosa)	Ubiquitin_mediated_proteolysis [04120]; Ubiquitin_system [04121]; Protein_processing_in_endoplasmic_reticulum [04141]	NA	NA	NA	NA	NA
gene640	17358725	CHLNCDRAFT_137543	6382.33	2841.67	0.445239	-1.16735	0.00066437	0.00630627	DOWN	RBR-type_E3_ubiquitin_transferase (EC_2.3.2.31)	Esi_0100_0096	Ectocarpus_siliculosus (Brown_alga) (Conferva_siliculosa)	Ubiquitin_system [04121]	metal_ion_binding [GO:0046872]; ubiquitin-protein_transferase_activity [GO:0004842]	GO:0004842; GO:0046872	GO:0004842~ubiquitin-protein_transferase_activity;GO:0046872~metal_ion_binding	NA	NA
gene7545	17352145	CHLNCDRAFT_138627	2438.3	876.611	0.359518	-1.47586	8.95018e-07	1.93151e-05	DOWN	Uncharacterized_protein	Esi_0280_0033	Ectocarpus_siliculosus (Brown_alga) (Conferva_siliculosa)	Ubiquitin_system [04121]	zinc_ion_binding [GO:0008270]	GO:0008270	GO:0008270~zinc_ion_binding	NA	NA
