# Supplementary material for: Exploring the Role of a Cytokinin-Activating Enzyme LONELY GUY in Unicellular Microalga Chlorella variabilis
Source: Front Plant Sci. 2021 Jan 29;11:611871. doi: 10.3389/fpls.2020.611871 (PMC7891180; doi:10.3389/fpls.2020.611871)
Supplement: Supplementary Table 3 — Major upregulated pathways in LOG OX1 as determined by RNA-Seq, 1.5-fold change, adjusted p-value (q-values) ≤ 0.05. [file Table_3.xlsx]

## Sheet: Sheet1
Table S3- Major upregulated pathways in LOG OX, 1.5-fold, adjusted p-value (q-values) ≤0.05
CvarLOG1
Gene_ID	Gene_ID	Name	CC Expression	CT Expression	FoldChange	log2FoldChange	P Value	Adjusted P Value	Regulation	Protein_name	Gene_Symbol	Organism_name	Pathway
gene8835	17350793	CHLNCDRAFT_28106	238.792	434.979	1.82158	0.865191	0.00186752	0.0146974	UP	Cytokinin_riboside_5'-monophosphate_phosphoribohydrolase (EC_3.2.2.n1)	BKP44_17915	Formosa_algae	Enzymes_with_EC_numbers[99980]
Chromosome associated
Gene_ID	Gene_ID	Name	CC Expression	CT Expression	FoldChange	log2FoldChange	P Value	Adjusted P Value	Regulation	Protein_name	Gene_Symbol	Organism_name	Pathway
gene2131	17357431	CHLNCDRAFT_142244	460.441	805.803	1.75007	0.807409	0.00287571	0.0212851	UP	Protein_arginine_N-methyltransferase	SKB1_Esi_0006_0115	Ectocarpus_siliculosus (Brown_alga) (Conferva_siliculosa)	Spliceosome [03041]; Chromosome_and_associated_proteins [03036]; RNA_transport [03013]
gene7937	17351701	CHLNCDRAFT_139139	347.515	648.073	1.86488	0.89908	0.000718787	0.00672335	UP	Origin_recognition_complex_subunit_1	Esi_0035_0148	Ectocarpus_siliculosus (Brown_alga) (Conferva_siliculosa)	Chromosome_and_associated_proteins [03036]; DNA_replication_proteins [03032]
gene8637	17350987	CHLNCDRAFT_140078	781.485	1493.96	1.91169	0.934849	0.000859216	0.00784187	UP	Caltractin (Centrin) (Fragment)	NA	Tetraselmis_striata (Green_microalga)	Chromosome_and_associated_proteins [03036]
gene5844	17353635	CHLNCDRAFT_36044	113.534	217.755	1.91798	0.939587	0.00540759	0.0348381	UP	Uncharacterized_protein (Fragment)	Esi_0128_0037	Ectocarpus_siliculosus (Brown_alga) (Conferva_siliculosa)	Cytoskeleton_proteins [04812]; Chromosome_and_associated_proteins [03036]
gene8743	17350924	CHLNCDRAFT_59234	764.043	1606.67	2.10286	1.07235	0.000141092	0.00165409	UP	SMC2 (STRUCTURAL_MAINTENANCE_OF_CHROMOSOMES_2)	Esi_0101_0095	Ectocarpus_siliculosus (Brown_alga) (Conferva_siliculosa)	Chromosome_and_associated_proteins [03036]
gene2975	17356605	CHLNCDRAFT_143580	418.107	880.75	2.10652	1.07486	7.56961e-05	0.000981907	UP	Uncharacterized_protein	Esi_0010_0177	Ectocarpus_siliculosus (Brown_alga) (Conferva_siliculosa)	Prokaryotic_defense_system [02048]; Chromosome_and_associated_proteins [03036]; Cytoskeleton_proteins [04812]
gene8349	17351226	CHLNCDRAFT_37179	17968.8	38602	2.14828	1.10319	0.00137298	0.011353	UP	Fructose-bisphosphate_aldolase, class_I	NA	Chlamydomonas_sp. (strain_W80)	Exosome [04147]; Pentose_phosphate_pathway [00030]; Glycolysis / Gluconeogenesis [00010]; Membrane_trafficking [04131]; Fructose_and_mannose_metabolism [00051]; Chromosome_and_associated_proteins [03036]; Carbon_fixation_in_photosynthetic_organisms [00710]
gene4991	17354762	CHLNCDRAFT_56178	1117.75	2434.49	2.17803	1.12302	0.000191322	0.00216135	UP	Obg-like_ATPase_1	OLA1_Esi_0072_0060	Ectocarpus_siliculosus (Brown_alga) (Conferva_siliculosa)	Chromosome_and_associated_proteins [03036]
gene1966	17357738	CHLNCDRAFT_10568	184.203	418.238	2.27053	1.18303	3.89316e-05	0.000547832	UP	Cyclin_B2	cycB2_Esi_0295_0026	Ectocarpus_siliculosus (Brown_alga) (Conferva_siliculosa)	Chromosome_and_associated_proteins [03036]; DNA_replication_proteins [03032]
gene2270	17357361	CHLNCDRAFT_142415	261.533	643.595	2.46085	1.29916	1.95522e-06	3.84847e-05	UP	Uncharacterized_protein	Esi_0153_0004	Ectocarpus_siliculosus (Brown_alga) (Conferva_siliculosa)	Chromosome_and_associated_proteins [03036]
gene5492	17353996	CHLNCDRAFT_135132	140.437	370.86	2.64075	1.40095	3.28296e-06	6.08834e-05	UP	Uncharacterized_protein	Esi_0114_0045	Ectocarpus_siliculosus (Brown_alga) (Conferva_siliculosa)	Chromosome_and_associated_proteins [03036]
gene4225	17355330	CHLNCDRAFT_145362	183.401	488.512	2.66362	1.41339	6.10072e-07	1.36875e-05	UP	Putative_microtubule-associated_protein_EB1	Esi_0107_0056	Ectocarpus_siliculosus (Brown_alga) (Conferva_siliculosa)	Chromosome_and_associated_proteins [03036]; Cytoskeleton_proteins [04812]
gene1640	17358343	CHLNCDRAFT_34202	244.411	684.782	2.80177	1.48634	5.5686e-08	1.56262e-06	UP	DNA_helicase (EC_3.6.4.12)	Esi_0063_0095	Ectocarpus_siliculosus (Brown_alga) (Conferva_siliculosa)	Chromosome_and_associated_proteins [03036]; DNA_replication [03030]; DNA_replication_proteins [03032]
gene7208	17352435	CHLNCDRAFT_10750	40.8813	133.578	3.26747	1.70817	8.21313e-05	0.00104771	UP	Possibly_a_dual-specificity_PK	PK_Esi_0045_0049	Ectocarpus_siliculosus (Brown_alga) (Conferva_siliculosa)	Chromosome_and_associated_proteins [03036]; Protein_kinases [01001]
gene835	17358677	CHLNCDRAFT_137783	264.582	954.848	3.60889	1.85156	1.74865e-11	9.19714e-10	UP	DNA_topoisomerase_II (EC_5.99.1.3)	TOP2_Esi_0042_0095	Ectocarpus_siliculosus (Brown_alga) (Conferva_siliculosa)	Chromosome_and_associated_proteins [03036]; DNA_replication_proteins [03032]
gene5089	17354550	CHLNCDRAFT_134635	235.82	879.487	3.72948	1.89897	4.57895e-12	2.65497e-10	UP	Structural_maintenance_of_chromosomes_protein	Esi_0056_0090	Ectocarpus_siliculosus (Brown_alga) (Conferva_siliculosa)	Chromosome_and_associated_proteins [03036]
gene7289	17352162	CHLNCDRAFT_9136	33.6778	140.468	4.17093	2.06037	2.68152e-06	5.09065e-05	UP	Kinesin-like_protein	Esi_0037_0124	Ectocarpus_siliculosus (Brown_alga) (Conferva_siliculosa)	Cytoskeleton_proteins [04812]; Chromosome_and_associated_proteins [03036]
gene6636	17352872	CHLNCDRAFT_25737	131	619.117	4.72609	2.24065	5.71383e-15	5.04547e-13	UP	DNA_helicase (EC_3.6.4.12)	Esi_0029_0091	Ectocarpus_siliculosus (Brown_alga) (Conferva_siliculosa)	Chromosome_and_associated_proteins [03036]; DNA_replication [03030]; DNA_replication_proteins [03032]
gene2872	17356517	CHLNCDRAFT_21604	3.12147	24.4656	7.83785	2.97046	0.000226254	0.00249449	UP	Kinesin-like_protein	Esi_0063_0039	Ectocarpus_siliculosus (Brown_alga) (Conferva_siliculosa)	Protein_phosphatases_and_associated_proteins [01009]; Chromosome_and_associated_proteins [03036]
DNA replication
Gene_ID	Gene_ID	Name	CC Expression	CT Expression	FoldChange	log2FoldChange	P Value	Adjusted P Value	Regulation	Protein_name	Gene_Symbol	Organism_name	Pathway
gene7819	17351808	CHLNCDRAFT_26745	574.369	1047.44	1.82364	0.866823	0.00137985	0.0113736	UP	DNA_polymerase_epsilon_catalytic_subunit (EC_2.7.7.7)	Esi_0006_0016	Ectocarpus_siliculosus (Brown_alga) (Conferva_siliculosa)	DNA_replication [03030]; Base_excision_repair [03410]; DNA_replication_proteins [03032]; Nucleotide_excision_repair [03420]; DNA_repair_and_recombination_proteins [03400]
gene7937	17351701	CHLNCDRAFT_139139	347.515	648.073	1.86488	0.89908	0.000718787	0.00672335	UP	Origin_recognition_complex_subunit_1	Esi_0035_0148	Ectocarpus_siliculosus (Brown_alga) (Conferva_siliculosa)	Chromosome_and_associated_proteins [03036]; DNA_replication_proteins [03032]
gene6712	17352930	CHLNCDRAFT_8099	216.455	430.937	1.99088	0.993407	0.000456978	0.00456266	UP	DNA_primase_large_subunit (EC_2.7.7.-)	Esi_0192_0018	Ectocarpus_siliculosus (Brown_alga) (Conferva_siliculosa)	DNA_replication [03030]; DNA_replication_proteins [03032]
gene3399	17356122	CHLNCDRAFT_21830	561.323	1121.94	1.99874	0.999091	0.000245561	0.00267065	UP	Uncharacterized_protein	Esi_0236_0008	Ectocarpus_siliculosus (Brown_alga) (Conferva_siliculosa)	Ribosome_biogenesis [03009]; Ribosome_biogenesis_in_eukaryotes [03008]; DNA_replication_proteins [03032]
gene2275	17357444	CHLNCDRAFT_142420	65.193	140.941	2.1619	1.1123	0.0048981	0.0321804	UP	DEAD_box_helicase	Esi_0088_0014	Ectocarpus_siliculosus (Brown_alga) (Conferva_siliculosa)	DNA_replication_proteins [03032]; DNA_repair_and_recombination_proteins [03400]
gene1270	17357848	CHLNCDRAFT_10114	157.152	342.736	2.18092	1.12494	0.000183348	0.00208843	UP	DNA_polymerase_alpha_subunit_B	Esi_0090_0069	Ectocarpus_siliculosus (Brown_alga) (Conferva_siliculosa)	DNA_replication [03030]; DNA_replication_proteins [03032]
gene1966	17357738	CHLNCDRAFT_10568	184.203	418.238	2.27053	1.18303	3.89316e-05	0.000547832	UP	Cyclin_B2	cycB2_Esi_0295_0026	Ectocarpus_siliculosus (Brown_alga) (Conferva_siliculosa)	Chromosome_and_associated_proteins [03036]; DNA_replication_proteins [03032]
gene8879	17350677	CHLNCDRAFT_28165	347.595	800.593	2.30323	1.20366	8.47022e-06	0.000142279	UP	DNA_helicase (EC_3.6.4.12)	Esi_0246_0019	Ectocarpus_siliculosus (Brown_alga) (Conferva_siliculosa)	DNA_replication [03030]; DNA_replication_proteins [03032]
gene1640	17358343	CHLNCDRAFT_34202	244.411	684.782	2.80177	1.48634	5.5686e-08	1.56262e-06	UP	DNA_helicase (EC_3.6.4.12)	Esi_0063_0095	Ectocarpus_siliculosus (Brown_alga) (Conferva_siliculosa)	Chromosome_and_associated_proteins [03036]; DNA_replication [03030]; DNA_replication_proteins [03032]
gene7242	17352470	CHLNCDRAFT_59751	751.876	2202.26	2.92901	1.55042	1.39062e-07	3.55977e-06	UP	Proliferating_cell_nuclear_antigen	Esi_0003_0098	Ectocarpus_siliculosus (Brown_alga) (Conferva_siliculosa)	Base_excision_repair [03410]; Nucleotide_excision_repair [03420]; DNA_replication_proteins [03032]; Mismatch_repair [03430]; DNA_replication [03030]; DNA_repair_and_recombination_proteins [03400]
gene835	17358677	CHLNCDRAFT_137783	264.582	954.848	3.60889	1.85156	1.74865e-11	9.19714e-10	UP	DNA_topoisomerase_II (EC_5.99.1.3)	TOP2_Esi_0042_0095	Ectocarpus_siliculosus (Brown_alga) (Conferva_siliculosa)	Chromosome_and_associated_proteins [03036]; DNA_replication_proteins [03032]
gene7844	17351740	CHLNCDRAFT_139024	198.258	769.321	3.88041	1.95621	2.35053e-12	1.45652e-10	UP	DNA_polymerase (EC_2.7.7.7)	Esi_0115_0081	Ectocarpus_siliculosus (Brown_alga) (Conferva_siliculosa)	DNA_replication [03030]; DNA_replication_proteins [03032]
gene6636	17352872	CHLNCDRAFT_25737	131	619.117	4.72609	2.24065	5.71383e-15	5.04547e-13	UP	DNA_helicase (EC_3.6.4.12)	Esi_0029_0091	Ectocarpus_siliculosus (Brown_alga) (Conferva_siliculosa)	Chromosome_and_associated_proteins [03036]; DNA_replication [03030]; DNA_replication_proteins [03032]
gene5830	17353652	CHLNCDRAFT_17561	11.5989	55.38	4.77459	2.25538	0.000188459	0.00213955	UP	Uncharacterized_protein	Esi_0071_0051	Ectocarpus_siliculosus (Brown_alga) (Conferva_siliculosa)	DNA_replication_proteins [03032]
Transporter
Gene_ID	Gene_ID	Name	CC Expression	CT Expression	FoldChange	log2FoldChange	P Value	Adjusted P Value	Regulation	Protein_name	Gene_Symbol	Organism_name	Pathway
gene8326	17351250	CHLNCDRAFT_27595	528.576	871.675	1.6491	0.72168	0.0069649	0.0424555	UP	N/a	Esi_0019_0103	Ectocarpus_siliculosus (Brown_alga) (Conferva_siliculosa)	Transporters [02000]
gene2098	17357408	CHLNCDRAFT_34403	585.051	998.425	1.70656	0.771092	0.00418766	0.0285253	UP	Sugar-phosphate:phosphate_translocator, DMT_family (Triosephosphate/phosphate_translocator)	Gasu_21660_Gs21660.1	Galdieria_sulphuraria (Red_alga)	Transporters [02000]
gene4545	17355079	CHLNCDRAFT_35424	518.007	933.476	1.80205	0.84964	0.00177453	0.0140806	UP	Sulfate_permease_2, chloroplastic	SULP2_CHLREDRAFT_116547	Chlamydomonas_reinhardtii (Chlamydomonas_smithii)	ABC_transporters [02010]; Sulfur_metabolism [00920]; Transporters [02000]
gene1357	17357827	CHLNCDRAFT_34049	66.2456	220.177	3.32364	1.73276	1.69858e-06	3.42744e-05	UP	Putative_sulfate_transporter_of_the_SLC26A11_family	AtSym-01	Acropora_tenuis (Purple_tipped_acropora)	Transporters [02000]
gene9467	17350157	CHLNCDRAFT_142571	346.103	1619.04	4.67792	2.22587	7.41859e-15	6.49126e-13	UP	ATP-binding_cassette_superfamily	Esi_0049_0023	Ectocarpus_siliculosus (Brown_alga) (Conferva_siliculosa)	Transporters [02000]; Exosome [04147]; ABC_transporters [02010]; CD_molecules [04090]
gene4570	17354877	CHLNCDRAFT_133898	186.694	1638.27	8.77516	3.13343	3.39863e-26	9.0866e-24	UP	Putative_sulfate_transporter_of_the_SLC26A11_family	AtSym-01	Acropora_tenuis (Purple_tipped_acropora)	Transporters [02000]
gene595	17359216	CHLNCDRAFT_133646	9.63485	95.3454	9.89588	3.30683	2.5004e-09	9.15069e-08	UP	Proline/betaine_transporter	phytr_3150	Candidatus_Phycorickettsia_trachydisci	Transporters [02000]
Light reaction
Gene_ID	Gene_ID	Name	CC Expression	CT Expression	FoldChange	log2FoldChange	P Value	Adjusted P Value	Regulation	Protein_name	Gene_Symbol	Organism_name	Pathway
gene1613	17358241	CHLNCDRAFT_29874	8885.88	17930.1	2.01782	1.0128	0.00404811	0.0278307	UP	Photosystem_I_reaction_center_subunit_III, chloroplastic (Light-harvesting_complex_I_17_kDa_protein) (P21_protein) (PSI-F)	PSAF	Chlamydomonas_reinhardtii (Chlamydomonas_smithii)	Photosynthesis [00195]; Photosynthesis_proteins [00194]
gene7356	17352340	CHLNCDRAFT_48299	11439.5	28405.1	2.48307	1.31212	0.000193621	0.00217965	UP	Plastocyanin	NA	Ulva_pertusa (Sea_lettuce)	Photosynthesis_proteins [00194]; Photosynthesis [00195]
gene7721	17351965	CHLNCDRAFT_138861	6029.11	15603.1	2.58796	1.37181	0.000118254	0.0014257	UP	Ferredoxin	petF	Guillardia_theta (Cryptophyte) (Cryptomonas_phi)	Photosynthesis_proteins [00194]; Photosynthesis [00195]
gene4072	17355657	CHLNCDRAFT_48761	1307.38	3636.86	2.7818	1.47602	3.69142e-06	6.79349e-05	UP	Chlorophyll_a/b-binding_protein_isoform_4 (Fragment)	NA	Karlodinium_veneficum (Dinoflagellate) (Karlodinium_micrum)	Photosynthesis - antenna_proteins [00196]; Photosynthesis_proteins [00194]
gene8356	17351286	CHLNCDRAFT_32868	19301.2	62412.5	3.23361	1.69315	7.70962e-07	1.69032e-05	UP	Oxygen-evolving_enhancer_protein	psbO	Porphyridium_purpureum (Red_alga) (Porphyridium_cruentum)	Photosynthesis_proteins [00194]; Photosynthesis [00195]
gene1602	17358156	CHLNCDRAFT_59584	4102.61	23427.9	5.71048	2.51361	9.77867e-12	5.34771e-10	UP	Light-harvesting_complex_protein_LHCC10 (Fragment)	NA	Rhodomonas_sp. CCMP768	Photosynthesis - antenna_proteins [00196]; Photosynthesis_proteins [00194]
Dark Reaction
Gene_ID	Gene_ID	Name	CC Expression	CT Expression	FoldChange	log2FoldChange	P Value	Adjusted P Value	Regulation	Protein_name	Gene_Symbol	Organism_name	Pathway
gene1808	17358038	CHLNCDRAFT_19601	1546.63	2783.91	1.79999	0.847988	0.00582847	0.0369559	UP	Chloroplast_sedoheptulose-1,7-bisphosphatase (EC_3.1.3.37)	SBP	Euglena_gracilis	Carbon_fixation_in_photosynthetic_organisms [00710]
gene4757	17355085	CHLNCDRAFT_31168	3357.08	6278.51	1.87023	0.903214	0.00788823	0.0467657	UP	Phosphoribulokinase (EC_2.7.1.19)	PRK_Esi_0000_0466	Ectocarpus_siliculosus (Brown_alga) (Conferva_siliculosa)	Carbon_fixation_in_photosynthetic_organisms [00710]
gene6329	17353357	CHLNCDRAFT_56246	736.009	1535.76	2.0866	1.06116	0.000161032	0.00185621	UP	Triosephosphate_isomerase/glyceraldehyde-3-phosphate_dehydrogenase (EC_5.3.1.1)	GAP_TPI_Esi_0187_0027	Ectocarpus_siliculosus (Brown_alga) (Conferva_siliculosa)	Exosome [04147]; Inositol_phosphate_metabolism [00562]; Fructose_and_mannose_metabolism [00051]; Glycolysis / Gluconeogenesis [00010]; Carbon_fixation_in_photosynthetic_organisms [00710]
gene8349	17351226	CHLNCDRAFT_37179	17968.8	38602	2.14828	1.10319	0.00137298	0.011353	UP	Fructose-bisphosphate_aldolase, class_I	NA	Chlamydomonas_sp. (strain_W80)	Exosome [04147]; Pentose_phosphate_pathway [00030]; Glycolysis / Gluconeogenesis [00010]; Membrane_trafficking [04131]; Fructose_and_mannose_metabolism [00051]; Chromosome_and_associated_proteins [03036]; Carbon_fixation_in_photosynthetic_organisms [00710]
gene714	17358404	CHLNCDRAFT_48457	1966.63	4551.7	2.31446	1.21068	0.000223973	0.00247501	UP	Phosphoglycerate_kinase (EC_2.7.2.3) (Fragment)	PGK	Cyanidioschyzon_merolae (Red_alga)	PATHWAY: Carbohydrate_degradation; glycolysis; pyruvate_from_D-glyceraldehyde_3-phosphate: step_2/5. {ECO:0000256|RuleBase:RU000532}.; Carbon_fixation_in_photosynthetic_organisms [00710]; Exosome [04147]; Glycolysis / Gluconeogenesis [00010]
gene537	17359576	CHLNCDRAFT_59545	12978.3	31747.7	2.44622	1.29056	0.000238062	0.00261569	UP	Ribulose_bisphosphate_carboxylase_small_chain_1, chloroplastic (RuBisCO_small_subunit_1) (EC_4.1.1.39)	RBCS-1_CHLRE_02g120100v5_CHLREDRAFT_82986	Chlamydomonas_reinhardtii (Chlamydomonas_smithii)	Glyoxylate_and_dicarboxylate_metabolism [00630]; Carbon_fixation_in_photosynthetic_organisms [00710]
gene1864	17357562	CHLNCDRAFT_34303	438.126	1077.45	2.45923	1.29821	2.18714e-06	4.23566e-05	UP	Ribose-5-phosphate_isomerase (EC_5.3.1.6)	RPI_Esi_0126_0081	Ectocarpus_siliculosus (Brown_alga) (Conferva_siliculosa)	Carbon_fixation_in_photosynthetic_organisms [00710]; Pentose_phosphate_pathway [00030]
gene538	17359197	CHLNCDRAFT_29368	14163.2	40445.4	2.85567	1.51383	1.48681e-05	0.00023693	UP	Ribulose_bisphosphate_carboxylase_small_chain_1, chloroplastic (RuBisCO_small_subunit_1) (EC_4.1.1.39)	RBCS-1_CHLRE_02g120100v5_CHLREDRAFT_82986	Chlamydomonas_reinhardtii (Chlamydomonas_smithii)	Glyoxylate_and_dicarboxylate_metabolism [00630]; Carbon_fixation_in_photosynthetic_organisms [00710]
gene4237	17355452	CHLNCDRAFT_145382	35.5823	293.998	8.26247	3.04657	1.94489e-16	1.97048e-14	UP	Glyceraldehyde-3-phosphate_dehydrogenase (EC_1.2.1.12)	Esi_0090_0074	Ectocarpus_siliculosus (Brown_alga) (Conferva_siliculosa)	PATHWAY: Carbohydrate_degradation; glycolysis; pyruvate_from_D-glyceraldehyde_3-phosphate: step_1/5. {ECO:0000256|RuleBase:RU361160}.; Exosome [04147]; Glycolysis / Gluconeogenesis [00010]; Carbon_fixation_in_photosynthetic_organisms [00710]; Membrane_trafficking [04131]
Ribosome and Ribosome biogenesis
Gene_ID	Gene_ID	Name	CC Expression	CT Expression	FoldChange	log2FoldChange	P Value	Adjusted P Value	Regulation	Protein_name	Gene_Symbol	Organism_name	Pathway
gene1500	17358143	CHLNCDRAFT_19454	263.965	437.418	1.6571	0.728663	0.00841925	0.0493516	UP	Heat_shock_protein_70	Hsp_Esi_0536_0011	Ectocarpus_siliculosus (Brown_alga) (Conferva_siliculosa)	Protein_processing_in_endoplasmic_reticulum [04141]; Membrane_trafficking [04131]; Mitochondrial_biogenesis [03029]; Spliceosome [03041]; Chaperones_and_folding_catalysts [03110]; Protein_phosphatases_and_associated_proteins [01009]; Endocytosis [04144]; Spliceosome [03040]; Exosome [04147]; Ribosome_biogenesis [03009]; Proteasome [03051]
gene4552	17355083	CHLNCDRAFT_23258	518.248	865.892	1.67081	0.740545	0.0056825	0.0362692	UP	DEAD_box_helicase	Esi_0179_0060	Ectocarpus_siliculosus (Brown_alga) (Conferva_siliculosa)	Ribosome_biogenesis [03009]
gene5794	17353880	CHLNCDRAFT_36029	1048.26	1773.71	1.69206	0.758779	0.00844128	0.0494148	UP	Uncharacterized_protein	Esi_0070_0009	Ectocarpus_siliculosus (Brown_alga) (Conferva_siliculosa)	Ribosome_biogenesis [03009]; Ribosome_biogenesis_in_eukaryotes [03008]
gene5305	17354456	CHLNCDRAFT_134882	311.782	528.6	1.69541	0.761638	0.00495574	0.0324483	UP	Uncharacterized_protein	Esi_0076_0077	Ectocarpus_siliculosus (Brown_alga) (Conferva_siliculosa)	Ribosome_biogenesis_in_eukaryotes [03008]; Ribosome_biogenesis [03009]
gene9066	17350561	CHLNCDRAFT_141384	238.386	437.718	1.83617	0.876702	0.00174808	0.0138937	UP	Ribosome_biogenesis_protein_WDR12_homolog	Esi_0201_0039	Ectocarpus_siliculosus (Brown_alga) (Conferva_siliculosa)	Ribosome_biogenesis [03009]
gene8132	17351580	CHLNCDRAFT_139408	583.418	1089.3	1.8671	0.900802	0.000955873	0.00852667	UP	60S_ribosome_subunit_biogenesis_protein_NIP7_homolog	Esi_0000_0389	Ectocarpus_siliculosus (Brown_alga) (Conferva_siliculosa)	Ribosome_biogenesis [03009]
gene2015	17357321	CHLNCDRAFT_142104	404.6	762.172	1.88377	0.913621	0.000654877	0.00623461	UP	Uncharacterized_protein	Esi_0513_0011	Ectocarpus_siliculosus (Brown_alga) (Conferva_siliculosa)	Ribosome_biogenesis [03009]
gene4681	17354921	CHLNCDRAFT_31142	2176.73	4110.98	1.8886	0.917318	0.00478072	0.0316033	UP	Probable_30S_ribosomal_protein_3, chloroplastic (PSRP-3)	ycf65	Chlorokybus_atmophyticus (Soil_alga)	Ribosome [03011]
gene6286	17353528	CHLNCDRAFT_56243	1396.54	2647.72	1.89592	0.922895	0.00246016	0.0185718	UP	Uncharacterized_protein	Esi_0063_0061	Ectocarpus_siliculosus (Brown_alga) (Conferva_siliculosa)	Ribosome [03011]; Ribosome [03010]
gene4366	17355338	CHLNCDRAFT_22955	3059.6	5905.48	1.93015	0.948713	0.00529213	0.0342778	UP	50S_ribosomal_protein_L13, chloroplastic	rpl13	Guillardia_theta (Cryptophyte) (Cryptomonas_phi)	Ribosome [03011]; Ribosome [03010]
gene9400	17350192	CHLNCDRAFT_142475	210.003	410.939	1.95682	0.968512	0.000629224	0.00606234	UP	Uncharacterized_protein	Esi_0414_0006	Ectocarpus_siliculosus (Brown_alga) (Conferva_siliculosa)	Ribosome_biogenesis [03009]
gene5682	17353898	CHLNCDRAFT_135382	5600.87	11146.4	1.99012	0.992858	0.00492573	0.0323177	UP	40S_ribosomal_protein_S12	Esi_0108_0011	Ectocarpus_siliculosus (Brown_alga) (Conferva_siliculosa)	Ribosome [03010]; Ribosome [03011]
gene3399	17356122	CHLNCDRAFT_21830	561.323	1121.94	1.99874	0.999091	0.000245561	0.00267065	UP	Uncharacterized_protein	Esi_0236_0008	Ectocarpus_siliculosus (Brown_alga) (Conferva_siliculosa)	Ribosome_biogenesis [03009]; Ribosome_biogenesis_in_eukaryotes [03008]; DNA_replication_proteins [03032]
gene830	17358643	CHLNCDRAFT_137775	206.574	425.387	2.05925	1.04212	0.000219004	0.00242847	UP	Uncharacterized_protein	Esi_0013_0075	Ectocarpus_siliculosus (Brown_alga) (Conferva_siliculosa)	Ribosome_biogenesis [03009]
gene8965	17350704	CHLNCDRAFT_28229	332.354	694.09	2.0884	1.0624	8.21838e-05	0.00104771	UP	RNA_helicase (EC_3.6.4.13)	Esi_0019_0085	Ectocarpus_siliculosus (Brown_alga) (Conferva_siliculosa)	Ribosome_biogenesis [03009]
gene7322	17352333	CHLNCDRAFT_26393	67.0722	141.546	2.11035	1.07748	0.00617397	0.0386069	UP	ATP-dependent_RNA_helicase (EC_3.6.4.13)	Esi_0216_0004	Ectocarpus_siliculosus (Brown_alga) (Conferva_siliculosa)	Ribosome_biogenesis [03009]
gene438	17359252	CHLNCDRAFT_133426	512.759	1149.56	2.24192	1.16473	1.82092e-05	0.000284981	UP	Midasin	Esi_0153_0013	Ectocarpus_siliculosus (Brown_alga) (Conferva_siliculosa)	Ribosome_biogenesis [03009]; Ribosome_biogenesis_in_eukaryotes [03008]
gene8789	17350838	CHLNCDRAFT_141018	384.499	920.272	2.39343	1.25908	3.73766e-06	6.83935e-05	UP	Uncharacterized_protein	Esi_0119_0026	Ectocarpus_siliculosus (Brown_alga) (Conferva_siliculosa)	Ribosome_biogenesis [03009]
gene439	17359253	CHLNCDRAFT_133427	190.784	461.032	2.41651	1.27292	5.17669e-06	9.20992e-05	UP	Midasin	Esi_0153_0013	Ectocarpus_siliculosus (Brown_alga) (Conferva_siliculosa)	Ribosome_biogenesis [03009]; Ribosome_biogenesis_in_eukaryotes [03008]
gene6843	17352831	CHLNCDRAFT_25981	156.919	391.813	2.49692	1.32015	7.01064e-06	0.000120281	UP	DEAD_box_helicase	Esi_0046_0082	Ectocarpus_siliculosus (Brown_alga) (Conferva_siliculosa)	Ribosome_biogenesis [03009]
gene5716	17354070	CHLNCDRAFT_135424	190.457	488.252	2.56358	1.35816	1.6127e-06	3.29559e-05	UP	DEAD_box_helicase	Esi_0135_0024	Ectocarpus_siliculosus (Brown_alga) (Conferva_siliculosa)	Ribosome_biogenesis [03009]; Spliceosome [03041]
gene8362	17351289	CHLNCDRAFT_27453	1283.66	3538.56	2.75661	1.46289	3.79732e-06	6.93534e-05	UP	Uncharacterized_protein	Esi_0062_0109	Ectocarpus_siliculosus (Brown_alga) (Conferva_siliculosa)	Ribosome_biogenesis [03009]; Protein_kinases [01001]; Ribosome_biogenesis_in_eukaryotes [03008]
gene8363	17351284	CHLNCDRAFT_56362	1552.11	4569.2	2.94387	1.55771	2.22221e-06	4.28632e-05	UP	Uncharacterized_protein	Esi_0347_0016	Ectocarpus_siliculosus (Brown_alga) (Conferva_siliculosa)	Ribosome_biogenesis [03009]
gene8177	17351414	CHLNCDRAFT_27284	135.203	658.041	4.86706	2.28305	1.54043e-15	1.48266e-13	UP	Protein_SDA1	Esi_0145_0073	Ectocarpus_siliculosus (Brown_alga) (Conferva_siliculosa)	Ribosome_biogenesis [03009]
